# Supplementary material for: Machine learning with new functional structure descriptors for design and screening of ionic liquids in CO 2 efficient capture
Source: Royal Society of Chemistry journal article supplement (doi:10.1039/d5cp01972a), 2025-01-01
Supplement: d5cp01972a2.xlsx [file d5cp01972a2.xlsx]

## Sheet: First page
								Machine learning with new functional structure descriptors for design and screening of ionic liquids in CO2 efficient capture
								Ranran Geng a, Wenjuan Deng a, Zhiqiang Hu a, Jianlei Wang a,
								Yuanyuan Zhao b, Baichuan Zhou b, Guocai Tiana, b, *
a Faculty of Metallurgical and Energy Engineering, Kunming University of Science and Technology, Kunming 650093, China
b State Key Laboratory of Complex Non-Ferrous Metal Resource Clean Utilization, Kunming University of Science and Technology, Kunming 650093, China
				* Corresponding author: tiangc@kust.edu.cn (Guocai Tian)

## Sheet: Table S1
Table S1.Database details (ref)
Ref[39]							Ref[40-42]
IL	cation	anion	T(K)	P(bar)	x_CO2		ILs	cation	anion	T(K)	P(bar)	x_CO2
[BMIM][BF4]	[BMIM]	[BF4]	363.15	246	0.61		[EMIM][MeSO3]	[EMIM]	[MeSO3]	273.15	3.56	0.0849
[BMIM][BF4]	[BMIM]	[BF4]	383.15	235	0.5		[EMIM][MeSO3]	[EMIM]	[MeSO3]	273.15	10.52	0.2124
[BMIM][BF4]	[BMIM]	[BF4]	353.15	223.3	0.61		[EMIM][MeSO3]	[EMIM]	[MeSO3]	273.15	22	0.3862
[BMIM][BF4]	[BMIM]	[BF4]	373.15	198	0.5		[BMMIM][BF4]	[BMMIM]	[BF4]	283.15	0.0072	0.001
[BMIM][BF4]	[BMIM]	[BF4]	343.15	188.5	0.61		[BMMIM][BF4]	[BMMIM]	[BF4]	283.15	0.0486	0.0015
[BMIM][BF4]	[BMIM]	[BF4]	382.95	185	0.458		[BMMIM][BF4]	[BMMIM]	[BF4]	283.15	0.0037	0.0021
[BMIM][BF4]	[BMIM]	[BF4]	363.15	171	0.5		[BMMIM][BF4]	[BMMIM]	[BF4]	283.15	0.197	0.0042
[BMIM][BF4]	[BMIM]	[BF4]	333.15	162	0.61		[BMMIM][BF4]	[BMMIM]	[BF4]	283.15	0.0955	0.005
[BMIM][BF4]	[BMIM]	[BF4]	373.15	160	0.458		[BMMIM][BF4]	[BMMIM]	[BF4]	283.15	0.597	0.0115
[BMIM][BF4]	[BMIM]	[BF4]	357.15	154	0.5		[BMMIM][BF4]	[BMMIM]	[BF4]	283.15	0.499	0.0126
[BMIM][BF4]	[BMIM]	[BF4]	352.05	145	0.5		[BMMIM][BF4]	[BMMIM]	[BF4]	283.15	0.999	0.0195
[BMIM][BF4]	[BMIM]	[BF4]	362.85	141.5	0.458		[BMMIM][BF4]	[BMMIM]	[BF4]	283.15	1.5	0.0357
[BMIM][BF4]	[BMIM]	[BF4]	323.55	141	0.61		[BMMIM][BF4]	[BMMIM]	[BF4]	283.15	2	0.0378
[BMIM][BF4]	[BMIM]	[BF4]	343.45	125.7	0.5		[BMMIM][BF4]	[BMMIM]	[BF4]	283.15	2.5	0.0561
[BMIM][BF4]	[BMIM]	[BF4]	354.25	125	0.458		[BMMIM][BF4]	[BMMIM]	[BF4]	283.15	3	0.0568
[BMIM][BF4]	[BMIM]	[BF4]	383.15	117	0.35		[BMMIM][BF4]	[BMMIM]	[BF4]	283.15	3.5	0.0751
[BMIM][BF4]	[BMIM]	[BF4]	333.35	105.9	0.5		[BMMIM][BF4]	[BMMIM]	[BF4]	283.15	4	0.0759
[BMIM][BF4]	[BMIM]	[BF4]	313.35	105	0.61		[BMMIM][BF4]	[BMMIM]	[BF4]	283.15	4.5	0.0929
[BMIM][BF4]	[BMIM]	[BF4]	343.75	104.9	0.458		[BMMIM][BF4]	[BMMIM]	[BF4]	283.15	5	0.0944
[BMIM][BF4]	[BMIM]	[BF4]	373.15	98	0.35		[BMMIM][BF4]	[BMMIM]	[BF4]	283.15	5.5	0.11
[BMIM][BF4]	[BMIM]	[BF4]	333.95	91	0.458		[BMMIM][BF4]	[BMMIM]	[BF4]	283.15	6	0.112
[BMIM][BF4]	[BMIM]	[BF4]	363.15	90	0.35		[BMMIM][BF4]	[BMMIM]	[BF4]	283.15	6.5	0.126
[BMIM][BF4]	[BMIM]	[BF4]	324.15	89.7	0.5		[BMMIM][BF4]	[BMMIM]	[BF4]	283.15	7	0.129
[BMIM][BF4]	[BMIM]	[BF4]	303.15	81	0.61		[BMMIM][BF4]	[BMMIM]	[BF4]	283.15	7.5	0.142
[BMIM][BF4]	[BMIM]	[BF4]	383.15	80.5	0.266		[BMMIM][BF4]	[BMMIM]	[BF4]	283.15	8	0.145
[BMIM][BF4]	[BMIM]	[BF4]	352.25	79.1	0.35		[BMMIM][BF4]	[BMMIM]	[BF4]	283.15	8.5	0.157
[BMIM][BF4]	[BMIM]	[BF4]	322.95	75.3	0.458		[BMMIM][BF4]	[BMMIM]	[BF4]	283.15	9	0.161
[BMIM][BF4]	[BMIM]	[BF4]	313.85	74.3	0.5		[BMMIM][BF4]	[BMMIM]	[BF4]	283.15	9.5	0.172
[BMIM][BF4]	[BMIM]	[BF4]	293.25	73	0.61		[BMMIM][BF4]	[BMMIM]	[BF4]	283.15	10	0.175
[BMIM][BF4]	[BMIM]	[BF4]	373.45	71.5	0.266		[BMMIM][BF4]	[BMMIM]	[BF4]	283.15	10.5	0.185
[BMIM][BF4]	[BMIM]	[BF4]	342.75	64.3	0.35		[BMMIM][BF4]	[BMMIM]	[BF4]	283.15	11	0.189
[BMIM][BF4]	[BMIM]	[BF4]	314.05	63.5	0.458		[BMMIM][BF4]	[BMMIM]	[BF4]	283.15	11.5	0.199
[BMIM][BF4]	[BMIM]	[BF4]	362.95	62.1	0.266		[BMMIM][BF4]	[BMMIM]	[BF4]	283.15	12	0.203
[BMIM][BF4]	[BMIM]	[BF4]	303.85	59.8	0.5		[BMMIM][BF4]	[BMMIM]	[BF4]	283.15	12.5	0.211
[BMIM][BF4]	[BMIM]	[BF4]	332.85	56.1	0.35		[BMMIM][PF6]	[BMMIM]	[PF6]	283.15	0.0003	7.1e-06
[BMIM][BF4]	[BMIM]	[BF4]	353.15	54.2	0.266		[BMMIM][PF6]	[BMMIM]	[PF6]	283.15	0.198	0.0018
[BMIM][BF4]	[BMIM]	[BF4]	303.15	49.3	0.458		[BMMIM][PF6]	[BMMIM]	[PF6]	283.15	0.0033	0.0054
[BMIM][BF4]	[BMIM]	[BF4]	293.15	47.2	0.5		[BMMIM][PF6]	[BMMIM]	[PF6]	283.15	0.598	0.0082
[BMIM][BF4]	[BMIM]	[BF4]	322.65	47.2	0.35		[BMMIM][PF6]	[BMMIM]	[PF6]	283.15	0.0965	0.0103
[BMIM][BF4]	[BMIM]	[BF4]	343.15	46.9	0.266		[BMMIM][PF6]	[BMMIM]	[PF6]	283.15	1	0.0157
[BMIM][BF4]	[BMIM]	[BF4]	293.65	41	0.458		[BMMIM][PF6]	[BMMIM]	[PF6]	283.15	0.5	0.0215
[BMIM][BF4]	[BMIM]	[BF4]	333.05	40	0.266		[BMMIM][PF6]	[BMMIM]	[PF6]	283.15	2	0.0325
[BMIM][BF4]	[BMIM]	[BF4]	313.45	38.9	0.35		[BMMIM][PF6]	[BMMIM]	[PF6]	283.15	1.5	0.0409
[BMIM][BF4]	[BMIM]	[BF4]	383.15	38	0.141		[BMMIM][PF6]	[BMMIM]	[PF6]	283.15	3	0.0511
[BMIM][BF4]	[BMIM]	[BF4]	323.05	34	0.266		[BMMIM][PF6]	[BMMIM]	[PF6]	283.15	2.5	0.0593
[BMIM][BF4]	[BMIM]	[BF4]	303.75	32	0.35		[BMMIM][PF6]	[BMMIM]	[PF6]	283.15	4	0.07
[BMIM][BF4]	[BMIM]	[BF4]	373.15	30.3	0.141		[BMMIM][PF6]	[BMMIM]	[PF6]	283.15	3.5	0.077
[BMIM][BF4]	[BMIM]	[BF4]	313.25	28.2	0.266		[BMMIM][PF6]	[BMMIM]	[PF6]	283.15	5	0.089
[BMIM][BF4]	[BMIM]	[BF4]	363.15	27.2	0.141		[BMMIM][PF6]	[BMMIM]	[PF6]	283.15	4.5	0.095
[BMIM][BF4]	[BMIM]	[BF4]	293.45	25.2	0.35		[BMMIM][PF6]	[BMMIM]	[PF6]	283.15	6	0.107
[BMIM][BF4]	[BMIM]	[BF4]	353.25	24.1	0.141		[BMMIM][PF6]	[BMMIM]	[PF6]	283.15	5.5	0.111
[BMIM][BF4]	[BMIM]	[BF4]	303.45	23.3	0.266		[BMMIM][PF6]	[BMMIM]	[PF6]	283.15	7	0.125
[BMIM][BF4]	[BMIM]	[BF4]	343.15	20.3	0.141		[BMMIM][PF6]	[BMMIM]	[PF6]	283.15	6.5	0.128
[BMIM][BF4]	[BMIM]	[BF4]	293.75	19	0.266		[BMMIM][PF6]	[BMMIM]	[PF6]	283.15	8	0.142
[BMIM][BF4]	[BMIM]	[BF4]	333.15	17.8	0.141		[BMMIM][PF6]	[BMMIM]	[PF6]	283.15	7.5	0.143
[BMIM][BF4]	[BMIM]	[BF4]	323.15	15.8	0.141		[BMMIM][PF6]	[BMMIM]	[PF6]	283.15	8.5	0.159
[BMIM][BF4]	[BMIM]	[BF4]	313.25	13.9	0.141		[BMMIM][PF6]	[BMMIM]	[PF6]	283.15	9	0.159
[BMIM][BF4]	[BMIM]	[BF4]	303.35	12	0.141		[BMMIM][PF6]	[BMMIM]	[PF6]	283.15	9.5	0.174
[BMIM][BF4]	[BMIM]	[BF4]	293.25	10.5	0.141		[BMMIM][PF6]	[BMMIM]	[PF6]	283.15	10	0.174
[BMIM][SCN]	[BMIM]	[SCN]	373.15	315	0.43		[BMMIM][PF6]	[BMMIM]	[PF6]	283.15	10.5	0.188
[BMIM][SCN]	[BMIM]	[SCN]	361.45	275	0.43		[BMMIM][PF6]	[BMMIM]	[PF6]	283.15	11	0.19
[BMIM][SCN]	[BMIM]	[SCN]	353.15	242	0.43		[BMMIM][PF6]	[BMMIM]	[PF6]	283.15	11.5	0.202
[BMIM][SCN]	[BMIM]	[SCN]	344.15	205	0.43		[BMMIM][PF6]	[BMMIM]	[PF6]	283.15	12	0.205
[BMIM][SCN]	[BMIM]	[SCN]	333.15	167	0.43		[BMMIM][PF6]	[BMMIM]	[PF6]	283.15	12.5	0.215
[BMIM][SCN]	[BMIM]	[SCN]	323.15	128	0.43		[BMMIM][PF6]	[BMMIM]	[PF6]	283.15	13	0.219
[BMIM][SCN]	[BMIM]	[SCN]	384.15	121.1	0.337		[EMIM][MeSO3]	[EMIM]	[MeSO3]	293.15	3.83	0.0548
[BMIM][SCN]	[BMIM]	[SCN]	373.15	106.7	0.337		[EMIM][MeSO3]	[EMIM]	[MeSO3]	293.15	11.36	0.1388
[BMIM][SCN]	[BMIM]	[SCN]	383.15	104	0.296		[EMIM][MeSO3]	[EMIM]	[MeSO3]	293.15	23.96	0.2547
[BMIM][SCN]	[BMIM]	[SCN]	313.65	99	0.43		[EMIM][MeSO3]	[EMIM]	[MeSO3]	293.15	45.77	0.4049
[BMIM][SCN]	[BMIM]	[SCN]	361.45	96.7	0.337		[BMMIM][BF4]	[BMMIM]	[BF4]	298.15	0.0035	0.00066
[BMIM][SCN]	[BMIM]	[SCN]	372.55	96	0.296		[BMMIM][BF4]	[BMMIM]	[BF4]	298.15	0.0105	0.0012
[BMIM][SCN]	[BMIM]	[SCN]	362.45	88	0.296		[BMMIM][BF4]	[BMMIM]	[BF4]	298.15	0.0481	0.0019
[BMIM][SCN]	[BMIM]	[SCN]	353.15	88	0.337		[BMMIM][BF4]	[BMMIM]	[BF4]	298.15	0.0965	0.0024
[BMIM][SCN]	[BMIM]	[SCN]	344.15	80	0.337		[BMMIM][BF4]	[BMMIM]	[BF4]	298.15	0.197	0.0041
[BMIM][SCN]	[BMIM]	[SCN]	381.95	79.8	0.254		[BMMIM][BF4]	[BMMIM]	[BF4]	298.15	0.499	0.0087
[BMIM][SCN]	[BMIM]	[SCN]	353.15	78	0.296		[BMMIM][BF4]	[BMMIM]	[BF4]	298.15	0.598	0.0101
[BMIM][SCN]	[BMIM]	[SCN]	373.15	74	0.254		[BMMIM][BF4]	[BMMIM]	[BF4]	298.15	0.999	0.0162
[BMIM][SCN]	[BMIM]	[SCN]	332.95	73	0.337		[BMMIM][BF4]	[BMMIM]	[BF4]	298.15	1.5	0.0247
[BMIM][SCN]	[BMIM]	[SCN]	343.45	71	0.296		[BMMIM][BF4]	[BMMIM]	[BF4]	298.15	2	0.0308
[BMIM][SCN]	[BMIM]	[SCN]	363.15	68.5	0.254		[BMMIM][BF4]	[BMMIM]	[BF4]	298.15	2.5	0.0393
[BMIM][SCN]	[BMIM]	[SCN]	322.75	65	0.337		[BMMIM][BF4]	[BMMIM]	[BF4]	298.15	3	0.0453
[BMIM][SCN]	[BMIM]	[SCN]	333.55	64	0.296		[BMMIM][BF4]	[BMMIM]	[BF4]	298.15	3.5	0.0534
[BMIM][SCN]	[BMIM]	[SCN]	352.95	62	0.254		[BMMIM][BF4]	[BMMIM]	[BF4]	298.15	4	0.0592
[BMIM][SCN]	[BMIM]	[SCN]	382.65	61.7	0.199		[BMMIM][BF4]	[BMMIM]	[BF4]	298.15	4.5	0.067
[BMIM][SCN]	[BMIM]	[SCN]	312.75	59	0.337		[BMMIM][BF4]	[BMMIM]	[BF4]	298.15	5	0.0729
[BMIM][SCN]	[BMIM]	[SCN]	323.65	58	0.296		[BMMIM][BF4]	[BMMIM]	[BF4]	298.15	5.5	0.08
[BMIM][SCN]	[BMIM]	[SCN]	343.75	56.1	0.254		[BMMIM][BF4]	[BMMIM]	[BF4]	298.15	6	0.0858
[BMIM][SCN]	[BMIM]	[SCN]	373.35	56	0.199		[BMMIM][BF4]	[BMMIM]	[BF4]	298.15	6.5	0.0927
[BMIM][SCN]	[BMIM]	[SCN]	302.95	55	0.337		[BMMIM][BF4]	[BMMIM]	[BF4]	298.15	7	0.0984
[BMIM][SCN]	[BMIM]	[SCN]	313.15	52.5	0.296		[BMMIM][BF4]	[BMMIM]	[BF4]	298.15	7.5	0.1049
[BMIM][SCN]	[BMIM]	[SCN]	363.15	49.9	0.199		[BMMIM][BF4]	[BMMIM]	[BF4]	298.15	8	0.1106
[BMIM][SCN]	[BMIM]	[SCN]	333.65	49.5	0.254		[BMMIM][BF4]	[BMMIM]	[BF4]	298.15	8.5	0.1166
[BMIM][SCN]	[BMIM]	[SCN]	303.35	48	0.296		[BMMIM][BF4]	[BMMIM]	[BF4]	298.15	9	0.1223
[BMIM][SCN]	[BMIM]	[SCN]	381.75	44.6	0.126		[BMMIM][BF4]	[BMMIM]	[BF4]	298.15	9.5	0.1281
[BMIM][SCN]	[BMIM]	[SCN]	352.85	44.5	0.199		[BMMIM][BF4]	[BMMIM]	[BF4]	298.15	10	0.1337
[BMIM][SCN]	[BMIM]	[SCN]	324.65	43.8	0.254		[BMMIM][BF4]	[BMMIM]	[BF4]	298.15	10.5	0.1391
[BMIM][SCN]	[BMIM]	[SCN]	293.35	43.5	0.296		[BMMIM][BF4]	[BMMIM]	[BF4]	298.15	11	0.1448
[BMIM][SCN]	[BMIM]	[SCN]	372.95	40.8	0.126		[BMMIM][BF4]	[BMMIM]	[BF4]	298.15	11.5	0.1499
[BMIM][SCN]	[BMIM]	[SCN]	342.55	39.9	0.199		[BMMIM][BF4]	[BMMIM]	[BF4]	298.15	12	0.1548
[BMIM][SCN]	[BMIM]	[SCN]	312.45	37	0.254		[BMMIM][BF4]	[BMMIM]	[BF4]	298.15	12.5	0.1603
[BMIM][SCN]	[BMIM]	[SCN]	333.15	36.1	0.199		[BMMIM][PF6]	[BMMIM]	[PF6]	298.15	0.0108	3.8e-06
[BMIM][SCN]	[BMIM]	[SCN]	363.35	35.5	0.126		[BMMIM][PF6]	[BMMIM]	[PF6]	298.15	0.047	0.0003
[BMIM][SCN]	[BMIM]	[SCN]	302.55	32.5	0.254		[BMMIM][PF6]	[BMMIM]	[PF6]	298.15	0.0003	0.00087
[BMIM][SCN]	[BMIM]	[SCN]	323.15	32	0.199		[BMMIM][PF6]	[BMMIM]	[PF6]	298.15	0.0033	0.0013
[BMIM][SCN]	[BMIM]	[SCN]	353.55	30.5	0.126		[BMMIM][PF6]	[BMMIM]	[PF6]	298.15	0.198	0.0013
[BMIM][SCN]	[BMIM]	[SCN]	312.75	28.6	0.199		[BMMIM][PF6]	[BMMIM]	[PF6]	298.15	0.0031	0.0016
[BMIM][SCN]	[BMIM]	[SCN]	293.05	28.5	0.254		[BMMIM][PF6]	[BMMIM]	[PF6]	298.15	0.199	0.0025
[BMIM][SCN]	[BMIM]	[SCN]	343.55	26.8	0.126		[BMMIM][PF6]	[BMMIM]	[PF6]	298.15	0.0968	0.0032
[BMIM][SCN]	[BMIM]	[SCN]	303.15	24.5	0.199		[BMMIM][PF6]	[BMMIM]	[PF6]	298.15	0.0968	0.0035
[BMIM][SCN]	[BMIM]	[SCN]	333.75	23.1	0.126		[BMMIM][PF6]	[BMMIM]	[PF6]	298.15	0.599	0.0071
[BMIM][SCN]	[BMIM]	[SCN]	293.65	20	0.199		[BMMIM][PF6]	[BMMIM]	[PF6]	298.15	0.6	0.0083
[BMIM][SCN]	[BMIM]	[SCN]	323.15	19.2	0.126		[BMMIM][PF6]	[BMMIM]	[PF6]	298.15	0.501	0.0106
[BMIM][SCN]	[BMIM]	[SCN]	312.95	16	0.126		[BMMIM][PF6]	[BMMIM]	[PF6]	298.15	0.501	0.011
[BMIM][SCN]	[BMIM]	[SCN]	303.25	13.1	0.126		[BMMIM][PF6]	[BMMIM]	[PF6]	298.15	1	0.0133
[BMIM][SCN]	[BMIM]	[SCN]	292.35	10.5	0.126		[BMMIM][PF6]	[BMMIM]	[PF6]	298.15	1	0.0144
[(ETO)2IM][Tf2N]	[(ETO)2IM]	[Tf2N]	322.15	328.6	0.812		[BMMIM][PF6]	[BMMIM]	[PF6]	298.15	1.5	0.0257
[(ETO)2IM][Tf2N]	[(ETO)2IM]	[Tf2N]	343.55	312.4	0.778		[BMMIM][PF6]	[BMMIM]	[PF6]	298.15	1.5	0.0262
[(ETO)2IM][Tf2N]	[(ETO)2IM]	[Tf2N]	313.05	282.6	0.812		[BMMIM][PF6]	[BMMIM]	[PF6]	298.15	2	0.0278
[(ETO)2IM][Tf2N]	[(ETO)2IM]	[Tf2N]	333.85	271.6	0.778		[BMMIM][PF6]	[BMMIM]	[PF6]	298.15	2	0.0288
[(ETO)2IM][Tf2N]	[(ETO)2IM]	[Tf2N]	362.85	224.2	0.712		[BMMIM][PF6]	[BMMIM]	[PF6]	298.15	2.5	0.0403
[(ETO)2IM][Tf2N]	[(ETO)2IM]	[Tf2N]	323.85	223.3	0.778		[BMMIM][PF6]	[BMMIM]	[PF6]	298.15	2.5	0.0406
[(ETO)2IM][Tf2N]	[(ETO)2IM]	[Tf2N]	303.15	213.4	0.812		[BMMIM][PF6]	[BMMIM]	[PF6]	298.15	3	0.0427
[(ETO)2IM][Tf2N]	[(ETO)2IM]	[Tf2N]	352.85	193.3	0.712		[BMMIM][PF6]	[BMMIM]	[PF6]	298.15	3	0.0435
[(ETO)2IM][Tf2N]	[(ETO)2IM]	[Tf2N]	312.95	166.6	0.778		[BMMIM][PF6]	[BMMIM]	[PF6]	298.15	3.5	0.0545
[(ETO)2IM][Tf2N]	[(ETO)2IM]	[Tf2N]	343.25	163.2	0.712		[BMMIM][PF6]	[BMMIM]	[PF6]	298.15	3.5	0.0548
[(ETO)2IM][Tf2N]	[(ETO)2IM]	[Tf2N]	362.95	132.4	0.626		[BMMIM][PF6]	[BMMIM]	[PF6]	298.15	4	0.0571
[(ETO)2IM][Tf2N]	[(ETO)2IM]	[Tf2N]	333.55	131.7	0.712		[BMMIM][PF6]	[BMMIM]	[PF6]	298.15	4	0.0579
[(ETO)2IM][Tf2N]	[(ETO)2IM]	[Tf2N]	353.25	115.1	0.626		[BMMIM][PF6]	[BMMIM]	[PF6]	298.15	4.5	0.0683
[(ETO)2IM][Tf2N]	[(ETO)2IM]	[Tf2N]	302.95	107.8	0.778		[BMMIM][PF6]	[BMMIM]	[PF6]	298.15	4.5	0.0687
[(ETO)2IM][Tf2N]	[(ETO)2IM]	[Tf2N]	323.95	103.4	0.712		[BMMIM][PF6]	[BMMIM]	[PF6]	298.15	5	0.0712
[(ETO)2IM][Tf2N]	[(ETO)2IM]	[Tf2N]	343.85	99.8	0.626		[BMMIM][PF6]	[BMMIM]	[PF6]	298.15	5	0.0719
[(ETO)2IM][Tf2N]	[(ETO)2IM]	[Tf2N]	363.05	97.7	0.554		[BMMIM][PF6]	[BMMIM]	[PF6]	298.15	5.5	0.0816
[(ETO)2IM][Tf2N]	[(ETO)2IM]	[Tf2N]	353.25	85.9	0.554		[BMMIM][PF6]	[BMMIM]	[PF6]	298.15	5.5	0.0819
[(ETO)2IM][Tf2N]	[(ETO)2IM]	[Tf2N]	333.85	84.5	0.626		[BMMIM][PF6]	[BMMIM]	[PF6]	298.15	6	0.0847
[(ETO)2IM][Tf2N]	[(ETO)2IM]	[Tf2N]	313.25	79	0.712		[BMMIM][PF6]	[BMMIM]	[PF6]	298.15	6	0.0853
[(ETO)2IM][Tf2N]	[(ETO)2IM]	[Tf2N]	343.55	75.1	0.554		[BMMIM][PF6]	[BMMIM]	[PF6]	298.15	6.5	0.0946
[(ETO)2IM][Tf2N]	[(ETO)2IM]	[Tf2N]	324.15	71.1	0.626		[BMMIM][PF6]	[BMMIM]	[PF6]	298.15	6.5	0.0949
[(ETO)2IM][Tf2N]	[(ETO)2IM]	[Tf2N]	334.05	64.8	0.554		[BMMIM][PF6]	[BMMIM]	[PF6]	298.15	7	0.0979
[(ETO)2IM][Tf2N]	[(ETO)2IM]	[Tf2N]	302.95	60.7	0.712		[BMMIM][PF6]	[BMMIM]	[PF6]	298.15	7	0.0986
[(ETO)2IM][Tf2N]	[(ETO)2IM]	[Tf2N]	313.35	57.7	0.626		[BMMIM][PF6]	[BMMIM]	[PF6]	298.15	7.5	0.1072
[(ETO)2IM][Tf2N]	[(ETO)2IM]	[Tf2N]	324.15	54.6	0.554		[BMMIM][PF6]	[BMMIM]	[PF6]	298.15	7.5	0.1075
[(ETO)2IM][Tf2N]	[(ETO)2IM]	[Tf2N]	363.15	52.5	0.396		[BMMIM][PF6]	[BMMIM]	[PF6]	298.15	8	0.1107
[(ETO)2IM][Tf2N]	[(ETO)2IM]	[Tf2N]	302.95	46.7	0.626		[BMMIM][PF6]	[BMMIM]	[PF6]	298.15	8	0.1115
[(ETO)2IM][Tf2N]	[(ETO)2IM]	[Tf2N]	353.25	46.6	0.396		[BMMIM][PF6]	[BMMIM]	[PF6]	298.15	8.5	0.1195
[(ETO)2IM][Tf2N]	[(ETO)2IM]	[Tf2N]	313.35	44.7	0.554		[BMMIM][PF6]	[BMMIM]	[PF6]	298.15	8.5	0.1197
[(ETO)2IM][Tf2N]	[(ETO)2IM]	[Tf2N]	343.65	41.1	0.396		[BMMIM][PF6]	[BMMIM]	[PF6]	298.15	9	0.1234
[(ETO)2IM][Tf2N]	[(ETO)2IM]	[Tf2N]	302.85	36	0.554		[BMMIM][PF6]	[BMMIM]	[PF6]	298.15	9	0.1238
[(ETO)2IM][Tf2N]	[(ETO)2IM]	[Tf2N]	333.85	36	0.396		[BMMIM][PF6]	[BMMIM]	[PF6]	298.15	9.5	0.1314
[(ETO)2IM][Tf2N]	[(ETO)2IM]	[Tf2N]	324.15	31.2	0.396		[BMMIM][PF6]	[BMMIM]	[PF6]	298.15	9.5	0.1317
[(ETO)2IM][Tf2N]	[(ETO)2IM]	[Tf2N]	313.35	25.7	0.396		[BMMIM][PF6]	[BMMIM]	[PF6]	298.15	10	0.1356
[(ETO)2IM][Tf2N]	[(ETO)2IM]	[Tf2N]	303.65	21.5	0.396		[BMMIM][PF6]	[BMMIM]	[PF6]	298.15	10	0.1358
[BBIM][MeSO3]	[BBIM]	[MeSO3]	343.15	342	0.7738		[BMMIM][PF6]	[BMMIM]	[PF6]	298.15	10.5	0.143
[BBIM][MeSO3]	[BBIM]	[MeSO3]	332.85	307.5	0.7738		[BMMIM][PF6]	[BMMIM]	[PF6]	298.15	10.5	0.1432
[BBIM][MeSO3]	[BBIM]	[MeSO3]	342.45	300.5	0.7631		[BMMIM][PF6]	[BMMIM]	[PF6]	298.15	11	0.1476
[BBIM][MeSO3]	[BBIM]	[MeSO3]	322.95	271.5	0.7738		[BMMIM][PF6]	[BMMIM]	[PF6]	298.15	11	0.1478
[BBIM][MeSO3]	[BBIM]	[MeSO3]	332.45	267.5	0.7631		[BMMIM][PF6]	[BMMIM]	[PF6]	298.15	12	0.159
[BBIM][MeSO3]	[BBIM]	[MeSO3]	313.95	237	0.7738		[BMMIM][PF6]	[BMMIM]	[PF6]	298.15	12.5	0.165
[BBIM][MeSO3]	[BBIM]	[MeSO3]	322.65	231.5	0.7631		[BMMIM][PF6]	[BMMIM]	[PF6]	298.15	13	0.17
[BBIM][MeSO3]	[BBIM]	[MeSO3]	341.75	217.5	0.7322		[C3OHMIM][Tf2N]	[C3OHMIM]	[Tf2N]	298.15	0.93	0.0227
[BBIM][MeSO3]	[BBIM]	[MeSO3]	312.95	193.5	0.7631		[C3OHMIM][Tf2N]	[C3OHMIM]	[Tf2N]	298.15	1.94	0.0468
[BBIM][MeSO3]	[BBIM]	[MeSO3]	302.45	189	0.7738		[C3OHMIM][Tf2N]	[C3OHMIM]	[Tf2N]	298.15	2.94	0.0709
[BBIM][MeSO3]	[BBIM]	[MeSO3]	331.25	183.5	0.7322		[C3OHMIM][Tf2N]	[C3OHMIM]	[Tf2N]	298.15	3.93	0.0929
[BBIM][MeSO3]	[BBIM]	[MeSO3]	299.15	175.5	0.7738		[C3OHMIM][Tf2N]	[C3OHMIM]	[Tf2N]	298.15	4.93	0.1151
[BBIM][MeSO3]	[BBIM]	[MeSO3]	343.15	175.5	0.7084		[C3OHMIM][Tf2N]	[C3OHMIM]	[Tf2N]	298.15	5.93	0.1351
[BBIM][MeSO3]	[BBIM]	[MeSO3]	303.85	156	0.7631		[C3OHMIM][Tf2N]	[C3OHMIM]	[Tf2N]	298.15	6.92	0.155
[BBIM][MeSO3]	[BBIM]	[MeSO3]	322.05	151.5	0.7322		[C3OHMIM][Tf2N]	[C3OHMIM]	[Tf2N]	298.15	7.93	0.1739
[BBIM][MeSO3]	[BBIM]	[MeSO3]	341.55	144	0.6814		[C3OHMIM][Tf2N]	[C3OHMIM]	[Tf2N]	298.15	8.92	0.1926
[BBIM][MeSO3]	[BBIM]	[MeSO3]	331.55	141.5	0.7084		[C3OHMIM][Tf2N]	[C3OHMIM]	[Tf2N]	298.15	9.93	0.2103
[BBIM][MeSO3]	[BBIM]	[MeSO3]	299.15	137	0.7631		[C3OHMIM][Tf2N]	[C3OHMIM]	[Tf2N]	298.15	10.93	0.2278
[BBIM][MeSO3]	[BBIM]	[MeSO3]	342.95	127.5	0.6494		[C3OHMIM][Tf2N]	[C3OHMIM]	[Tf2N]	298.15	11.93	0.2443
[BBIM][MeSO3]	[BBIM]	[MeSO3]	331.85	120.5	0.6814		[C3OHMIM][Tf2N]	[C3OHMIM]	[Tf2N]	298.15	12.92	0.2599
[BBIM][MeSO3]	[BBIM]	[MeSO3]	312.85	117	0.7322		[C3OHMIM][Tf2N]	[C3OHMIM]	[Tf2N]	298.15	13.92	0.275
[BBIM][MeSO3]	[BBIM]	[MeSO3]	322.45	114	0.7084		[C3OHMIM][Tf2N]	[C3OHMIM]	[Tf2N]	298.15	14.93	0.2895
[BBIM][MeSO3]	[BBIM]	[MeSO3]	342.85	113	0.6161		[C3OHMIM][Tf2N]	[C3OHMIM]	[Tf2N]	298.15	15.93	0.3046
[BBIM][MeSO3]	[BBIM]	[MeSO3]	332.55	107.5	0.6494		[C3OHMIM][Tf2N]	[C3OHMIM]	[Tf2N]	298.15	16.93	0.3189
[BBIM][MeSO3]	[BBIM]	[MeSO3]	321.85	97.5	0.6814		[C3OHMIM][Tf2N]	[C3OHMIM]	[Tf2N]	298.15	17.93	0.3318
[BBIM][MeSO3]	[BBIM]	[MeSO3]	332.75	97	0.6161		[C3OHMIM][Tf2N]	[C3OHMIM]	[Tf2N]	298.15	18.92	0.3451
[BBIM][MeSO3]	[BBIM]	[MeSO3]	341.45	95.5	0.5695		[C3OHMIM][Tf2N]	[C3OHMIM]	[Tf2N]	298.15	19.92	0.3577
[BBIM][MeSO3]	[BBIM]	[MeSO3]	323.05	90.5	0.6494		[AIM][Tf2N]	[AIM]	[Tf2N]	303.15	0.199	0.006
[BBIM][MeSO3]	[BBIM]	[MeSO3]	313.15	87.5	0.7084		[AIM][Tf2N]	[AIM]	[Tf2N]	303.15	0.497	0.013
[BBIM][MeSO3]	[BBIM]	[MeSO3]	333.15	84.5	0.5695		[AIM][Tf2N]	[AIM]	[Tf2N]	303.15	0.998	0.025
[BBIM][MeSO3]	[BBIM]	[MeSO3]	323.55	83	0.6161		[AIM][Tf2N]	[AIM]	[Tf2N]	303.15	2.007	0.048
[BBIM][MeSO3]	[BBIM]	[MeSO3]	303.15	81.5	0.7322		[AIM][Tf2N]	[AIM]	[Tf2N]	303.15	3.998	0.093
[BBIM][MeSO3]	[BBIM]	[MeSO3]	312.95	80.5	0.6814		[AIM][Tf2N]	[AIM]	[Tf2N]	303.15	5.998	0.134
[BBIM][MeSO3]	[BBIM]	[MeSO3]	342.05	79.5	0.5112		[AIM][Tf2N]	[AIM]	[Tf2N]	303.15	7.999	0.172
[BBIM][MeSO3]	[BBIM]	[MeSO3]	312.95	74	0.6494		[AIM][Tf2N]	[AIM]	[Tf2N]	303.15	9.999	0.206
[BBIM][MeSO3]	[BBIM]	[MeSO3]	322.95	72.5	0.5695		[AIM][Tf2N]	[AIM]	[Tf2N]	303.15	11.996	0.239
[BBIM][MeSO3]	[BBIM]	[MeSO3]	304.15	70	0.7084		[AIM][Tf2N]	[AIM]	[Tf2N]	303.15	13.999	0.269
[BBIM][MeSO3]	[BBIM]	[MeSO3]	332.85	70	0.5112		[AIM][Tf2N]	[AIM]	[Tf2N]	303.15	15	0.283
[BBIM][MeSO3]	[BBIM]	[MeSO3]	313.65	69.5	0.6161		[C3OHMIM][Tf2N]	[C3OHMIM]	[Tf2N]	303.15	0.199	0.005
[BBIM][MeSO3]	[BBIM]	[MeSO3]	305.25	67.5	0.6814		[C3OHMIM][Tf2N]	[C3OHMIM]	[Tf2N]	303.15	0.499	0.011
[BBIM][MeSO3]	[BBIM]	[MeSO3]	305.25	63.5	0.6494		[C3OHMIM][Tf2N]	[C3OHMIM]	[Tf2N]	303.15	0.997	0.022
[BBIM][MeSO3]	[BBIM]	[MeSO3]	297.95	62.5	0.7322		[C3OHMIM][Tf2N]	[C3OHMIM]	[Tf2N]	303.15	1.996	0.045
[BBIM][MeSO3]	[BBIM]	[MeSO3]	313.55	61.5	0.5695		[C3OHMIM][Tf2N]	[C3OHMIM]	[Tf2N]	303.15	4.001	0.087
[BBIM][MeSO3]	[BBIM]	[MeSO3]	323.45	61	0.5112		[C3OHMIM][Tf2N]	[C3OHMIM]	[Tf2N]	303.15	6.007	0.126
[BBIM][MeSO3]	[BBIM]	[MeSO3]	297.55	59.5	0.7084		[C3OHMIM][Tf2N]	[C3OHMIM]	[Tf2N]	303.15	7.989	0.162
[BBIM][MeSO3]	[BBIM]	[MeSO3]	343.35	58.5	0.4085		[C3OHMIM][Tf2N]	[C3OHMIM]	[Tf2N]	303.15	9.987	0.195
[BBIM][MeSO3]	[BBIM]	[MeSO3]	303.75	57.5	0.6161		[C3OHMIM][Tf2N]	[C3OHMIM]	[Tf2N]	303.15	10.998	0.211
[BBIM][MeSO3]	[BBIM]	[MeSO3]	297.75	57	0.6814		[C4PY][NO3]	[C4PY]	[NO3]	303.15	2.3	0.025
[BBIM][MeSO3]	[BBIM]	[MeSO3]	297.75	54	0.6494		[C4PY][NO3]	[C4PY]	[NO3]	303.15	3.99	0.045
[BBIM][MeSO3]	[BBIM]	[MeSO3]	314.15	53	0.5112		[C4PY][NO3]	[C4PY]	[NO3]	303.15	6.85	0.078
[BBIM][MeSO3]	[BBIM]	[MeSO3]	334.15	53	0.4085		[C4PY][NO3]	[C4PY]	[NO3]	303.15	8.54	0.095
[BBIM][MeSO3]	[BBIM]	[MeSO3]	304.05	52	0.5695		[C4PY][NO3]	[C4PY]	[NO3]	303.15	10.94	0.119
[BBIM][MeSO3]	[BBIM]	[MeSO3]	298.15	51	0.6161		[C4PY][NO3]	[C4PY]	[NO3]	303.15	13.71	0.143
[BBIM][MeSO3]	[BBIM]	[MeSO3]	323.75	46	0.4085		[C4PY][NO3]	[C4PY]	[NO3]	303.15	15.81	0.161
[BBIM][MeSO3]	[BBIM]	[MeSO3]	297.65	45.5	0.5695		[C4PY][SCN]	[C4PY]	[SCN]	303.15	4.68	0.031
[BBIM][MeSO3]	[BBIM]	[MeSO3]	304.25	44.5	0.5112		[C4PY][SCN]	[C4PY]	[SCN]	303.15	8.06	0.063
[BBIM][MeSO3]	[BBIM]	[MeSO3]	313.95	40	0.4085		[C4PY][SCN]	[C4PY]	[SCN]	303.15	11.11	0.094
[BBIM][MeSO3]	[BBIM]	[MeSO3]	343.35	39.5	0.2861		[C4PY][SCN]	[C4PY]	[SCN]	303.15	14.64	0.126
[BBIM][MeSO3]	[BBIM]	[MeSO3]	297.25	39	0.5112		[C4PY][SCN]	[C4PY]	[SCN]	303.15	17.55	0.153
[BBIM][MeSO3]	[BBIM]	[MeSO3]	333.05	35.5	0.2861		[C4PY][SCN]	[C4PY]	[SCN]	303.15	20.99	0.18
[BBIM][MeSO3]	[BBIM]	[MeSO3]	304.45	34.5	0.4085		[BVIM][Tf2N]	[BVIM]	[Tf2N]	303.2	7.4	0.125
[BBIM][MeSO3]	[BBIM]	[MeSO3]	323.45	32	0.2861		[BVIM][Tf2N]	[BVIM]	[Tf2N]	303.2	12.9	0.286
[BBIM][MeSO3]	[BBIM]	[MeSO3]	297.25	31	0.4085		[BVIM][Tf2N]	[BVIM]	[Tf2N]	303.2	17.5	0.354
[BBIM][MeSO3]	[BBIM]	[MeSO3]	313.85	28.5	0.2861		[BVIM][Tf2N]	[BVIM]	[Tf2N]	303.2	22.8	0.418
[BBIM][MeSO3]	[BBIM]	[MeSO3]	304.15	25	0.2861		[BVIM][Tf2N]	[BVIM]	[Tf2N]	303.2	30.2	0.495
[BBIM][MeSO3]	[BBIM]	[MeSO3]	297.05	22.5	0.2861		[BVIM][Tf2N]	[BVIM]	[Tf2N]	303.2	37.8	0.562
[BBIM][MeSO3]	[BBIM]	[MeSO3]	342.25	21.5	0.1389		[BVIM][Tf2N]	[BVIM]	[Tf2N]	303.2	48.9	0.64
[BBIM][MeSO3]	[BBIM]	[MeSO3]	332.65	20	0.1389		[BVIM][Tf2N]	[BVIM]	[Tf2N]	303.2	71.1	0.73
[BBIM][MeSO3]	[BBIM]	[MeSO3]	322.95	18.5	0.1389		[EMIM][BETI]	[EMIM]	[BETA]	303.2	4.8	0.124
[BBIM][MeSO3]	[BBIM]	[MeSO3]	312.55	17	0.1389		[EMIM][BETI]	[EMIM]	[BETA]	303.2	11.3	0.235
[BBIM][MeSO3]	[BBIM]	[MeSO3]	304.95	16	0.1389		[EMIM][BETI]	[EMIM]	[BETA]	303.2	19.1	0.338
[BBIM][MeSO3]	[BBIM]	[MeSO3]	296.95	15	0.1389		[EMIM][BETI]	[EMIM]	[BETA]	303.2	24	0.401
[BMIM][MeSO3]	[BMIM]	[MeSO3]	343.15	357	0.5219		[EMIM][BETI]	[EMIM]	[BETA]	303.2	35.9	0.505
[BMIM][MeSO3]	[BMIM]	[MeSO3]	333.55	317.5	0.5219		[EMIM][BETI]	[EMIM]	[BETA]	303.2	43.9	0.571
[BMIM][MeSO3]	[BMIM]	[MeSO3]	342.95	307.5	0.4974		[EMIM][BETI]	[EMIM]	[BETA]	303.2	61.1	0.679
[BMIM][MeSO3]	[BMIM]	[MeSO3]	323.75	266.5	0.5219		[EMIM][BETI]	[EMIM]	[BETA]	303.2	83	0.733
[BMIM][MeSO3]	[BMIM]	[MeSO3]	333.15	263.5	0.4974		[HMIM][BETI]	[HMIM]	[BETA]	303.2	6.3	0.226
[BMIM][MeSO3]	[BMIM]	[MeSO3]	313.75	216	0.5219		[HMIM][BETI]	[HMIM]	[BETA]	303.2	11	0.321
[BMIM][MeSO3]	[BMIM]	[MeSO3]	323.25	214	0.4974		[HMIM][BETI]	[HMIM]	[BETA]	303.2	17.6	0.419
[BMIM][MeSO3]	[BMIM]	[MeSO3]	342.95	196	0.4576		[HMIM][BETI]	[HMIM]	[BETA]	303.2	23.9	0.493
[BMIM][MeSO3]	[BMIM]	[MeSO3]	313.35	160	0.4974		[HMIM][BETI]	[HMIM]	[BETA]	303.2	26.9	0.522
[BMIM][MeSO3]	[BMIM]	[MeSO3]	304.45	158	0.5219		[HMIM][BETI]	[HMIM]	[BETA]	303.2	35.6	0.601
[BMIM][MeSO3]	[BMIM]	[MeSO3]	333.15	156	0.4576		[HMIM][BETI]	[HMIM]	[BETA]	303.2	43.7	0.647
[BMIM][MeSO3]	[BMIM]	[MeSO3]	343.15	120.5	0.3971		[HMIM][BETI]	[HMIM]	[BETA]	303.2	50.1	0.689
[BMIM][MeSO3]	[BMIM]	[MeSO3]	323.35	116.5	0.4576		[HMIM][BETI]	[HMIM]	[BETA]	303.2	59.3	0.749
[BMIM][MeSO3]	[BMIM]	[MeSO3]	332.95	98	0.3971		[C4PY][NO3]	[C4PY]	[NO3]	313.15	2.4	0.024
[BMIM][MeSO3]	[BMIM]	[MeSO3]	302.45	97	0.4974		[C4PY][NO3]	[C4PY]	[NO3]	313.15	4.43	0.045
[BMIM][MeSO3]	[BMIM]	[MeSO3]	342.75	96.5	0.3547		[C4PY][NO3]	[C4PY]	[NO3]	313.15	7.95	0.078
[BMIM][MeSO3]	[BMIM]	[MeSO3]	313.25	82.5	0.4576		[C4PY][NO3]	[C4PY]	[NO3]	313.15	11.15	0.109
[BMIM][MeSO3]	[BMIM]	[MeSO3]	332.95	80.5	0.3547		[C4PY][NO3]	[C4PY]	[NO3]	313.15	13.97	0.139
[BMIM][MeSO3]	[BMIM]	[MeSO3]	323.05	78.5	0.3971		[C4PY][NO3]	[C4PY]	[NO3]	313.15	17.61	0.166
[BMIM][MeSO3]	[BMIM]	[MeSO3]	342.75	72	0.2941		[C4PY][NO3]	[C4PY]	[NO3]	313.15	21.06	0.19
[BMIM][MeSO3]	[BMIM]	[MeSO3]	322.95	65.5	0.3547		[C4PY][SCN]	[C4PY]	[SCN]	313.15	3.86	0.03
[BMIM][MeSO3]	[BMIM]	[MeSO3]	303.35	62	0.4576		[C4PY][SCN]	[C4PY]	[SCN]	313.15	6.81	0.054
[BMIM][MeSO3]	[BMIM]	[MeSO3]	312.45	61.5	0.3971		[C4PY][SCN]	[C4PY]	[SCN]	313.15	9.84	0.081
[BMIM][MeSO3]	[BMIM]	[MeSO3]	332.75	60.5	0.2941		[C4PY][SCN]	[C4PY]	[SCN]	313.15	13.06	0.106
[BMIM][MeSO3]	[BMIM]	[MeSO3]	342.75	57.5	0.2482		[C4PY][SCN]	[C4PY]	[SCN]	313.15	16.1	0.129
[BMIM][MeSO3]	[BMIM]	[MeSO3]	313.25	53	0.3547		[C4PY][SCN]	[C4PY]	[SCN]	313.15	20.02	0.155
[BMIM][MeSO3]	[BMIM]	[MeSO3]	323.05	50.5	0.2941		[EMIM][MeSO3]	[EMIM]	[MeSO3]	313.15	4.01	0.0367
[BMIM][MeSO3]	[BMIM]	[MeSO3]	302.65	49.5	0.3971		[EMIM][MeSO3]	[EMIM]	[MeSO3]	313.15	11.82	0.0993
[BMIM][MeSO3]	[BMIM]	[MeSO3]	333.85	49	0.2482		[EMIM][MeSO3]	[EMIM]	[MeSO3]	313.15	24.83	0.1948
[BMIM][MeSO3]	[BMIM]	[MeSO3]	303.05	42	0.3547		[EMIM][MeSO3]	[EMIM]	[MeSO3]	313.15	47.49	0.3077
[BMIM][MeSO3]	[BMIM]	[MeSO3]	312.95	41	0.2941		[BVIM][Tf2N]	[BVIM]	[Tf2N]	313.2	8.6	0.125
[BMIM][MeSO3]	[BMIM]	[MeSO3]	323.65	40.5	0.2482		[BVIM][Tf2N]	[BVIM]	[Tf2N]	313.2	15	0.286
[BMIM][MeSO3]	[BMIM]	[MeSO3]	342.35	39.5	0.1835		[BVIM][Tf2N]	[BVIM]	[Tf2N]	313.2	20.8	0.354
[BMIM][MeSO3]	[BMIM]	[MeSO3]	332.55	33.5	0.1835		[BVIM][Tf2N]	[BVIM]	[Tf2N]	313.2	26.9	0.418
[BMIM][MeSO3]	[BMIM]	[MeSO3]	313.45	33	0.2482		[BVIM][Tf2N]	[BVIM]	[Tf2N]	313.2	36.1	0.495
[BMIM][MeSO3]	[BMIM]	[MeSO3]	302.75	32.5	0.2941		[BVIM][Tf2N]	[BVIM]	[Tf2N]	313.2	46.6	0.562
[BMIM][MeSO3]	[BMIM]	[MeSO3]	343.05	31.5	0.1467		[BVIM][Tf2N]	[BVIM]	[Tf2N]	313.2	61.1	0.64
[BMIM][MeSO3]	[BMIM]	[MeSO3]	342.85	28.5	0.13		[BVIM][Tf2N]	[BVIM]	[Tf2N]	313.2	92.4	0.73
[BMIM][MeSO3]	[BMIM]	[MeSO3]	322.85	28	0.1835		[EMIM][BETI]	[EMIM]	[BETA]	313.2	5.3	0.124
[BMIM][MeSO3]	[BMIM]	[MeSO3]	332.85	26.5	0.1467		[EMIM][BETI]	[EMIM]	[BETA]	313.2	12.5	0.235
[BMIM][MeSO3]	[BMIM]	[MeSO3]	302.45	26	0.2482		[EMIM][BETI]	[EMIM]	[BETA]	313.2	20.7	0.338
[BMIM][MeSO3]	[BMIM]	[MeSO3]	332.85	24.5	0.13		[EMIM][BETI]	[EMIM]	[BETA]	313.2	26.8	0.401
[BMIM][MeSO3]	[BMIM]	[MeSO3]	313.35	23.5	0.1835		[EMIM][BETI]	[EMIM]	[BETA]	313.2	39.1	0.505
[BMIM][MeSO3]	[BMIM]	[MeSO3]	324.05	22.5	0.1467		[EMIM][BETI]	[EMIM]	[BETA]	313.2	49.8	0.571
[BMIM][MeSO3]	[BMIM]	[MeSO3]	342.35	20.5	0.0904		[EMIM][BETI]	[EMIM]	[BETA]	313.2	77.5	0.679
[BMIM][MeSO3]	[BMIM]	[MeSO3]	323.15	20.5	0.13		[EMIM][BETI]	[EMIM]	[BETA]	313.2	115	0.733
[BMIM][MeSO3]	[BMIM]	[MeSO3]	314.45	19	0.1467		[HMIM][BETI]	[HMIM]	[BETA]	313.2	7.6	0.226
[BMIM][MeSO3]	[BMIM]	[MeSO3]	302.35	18.5	0.1835		[HMIM][BETI]	[HMIM]	[BETA]	313.2	13.1	0.321
[BMIM][MeSO3]	[BMIM]	[MeSO3]	332.95	17.5	0.0904		[HMIM][BETI]	[HMIM]	[BETA]	313.2	21	0.419
[BMIM][MeSO3]	[BMIM]	[MeSO3]	313.85	17	0.13		[HMIM][BETI]	[HMIM]	[BETA]	313.2	28.5	0.493
[BMIM][MeSO3]	[BMIM]	[MeSO3]	303.95	15	0.1467		[HMIM][BETI]	[HMIM]	[BETA]	313.2	31.9	0.522
[BMIM][MeSO3]	[BMIM]	[MeSO3]	323.15	14.5	0.0904		[HMIM][BETI]	[HMIM]	[BETA]	313.2	43	0.601
[BMIM][MeSO3]	[BMIM]	[MeSO3]	303.85	14	0.13		[HMIM][BETI]	[HMIM]	[BETA]	313.2	52.8	0.647
[BMIM][MeSO3]	[BMIM]	[MeSO3]	342.75	13	0.0517		[HMIM][BETI]	[HMIM]	[BETA]	313.2	60.3	0.689
[BMIM][MeSO3]	[BMIM]	[MeSO3]	314.55	12.5	0.0904		[HMIM][BETI]	[HMIM]	[BETA]	313.2	72.8	0.749
[BMIM][MeSO3]	[BMIM]	[MeSO3]	333.05	10.5	0.0517		[AIM][Tf2N]	[AIM]	[Tf2N]	323.15	0.199	0.004
[BMIM][MeSO3]	[BMIM]	[MeSO3]	304.55	10	0.0904		[AIM][Tf2N]	[AIM]	[Tf2N]	323.15	0.496	0.009
[BMIM][MeSO3]	[BMIM]	[MeSO3]	323.65	9	0.0517		[AIM][Tf2N]	[AIM]	[Tf2N]	323.15	1.005	0.017
[BMIM][MeSO3]	[BMIM]	[MeSO3]	314.05	7	0.0517		[AIM][Tf2N]	[AIM]	[Tf2N]	323.15	1.996	0.036
[BMIM][MeSO3]	[BMIM]	[MeSO3]	303.35	5.5	0.0517		[AIM][Tf2N]	[AIM]	[Tf2N]	323.15	4.003	0.069
[EMIM][MeSO3]	[EMIM]	[MeSO3]	332.75	461.5	0.4518		[AIM][Tf2N]	[AIM]	[Tf2N]	323.15	5.999	0.099
[EMIM][MeSO3]	[EMIM]	[MeSO3]	323.15	396	0.4518		[AIM][Tf2N]	[AIM]	[Tf2N]	323.15	8.004	0.128
[EMIM][MeSO3]	[EMIM]	[MeSO3]	342.65	382	0.4349		[AIM][Tf2N]	[AIM]	[Tf2N]	323.15	9.999	0.155
[EMIM][MeSO3]	[EMIM]	[MeSO3]	313.65	327	0.4518		[AIM][Tf2N]	[AIM]	[Tf2N]	323.15	11.996	0.181
[EMIM][MeSO3]	[EMIM]	[MeSO3]	332.55	325	0.4349		[AIM][Tf2N]	[AIM]	[Tf2N]	323.15	13.997	0.206
[EMIM][MeSO3]	[EMIM]	[MeSO3]	342.55	318	0.4153		[AIM][Tf2N]	[AIM]	[Tf2N]	323.15	14.998	0.219
[EMIM][MeSO3]	[EMIM]	[MeSO3]	332.95	266.5	0.4153		[BMMIM][BF4]	[BMMIM]	[BF4]	323.15	0.0003	6.3e-06
[EMIM][MeSO3]	[EMIM]	[MeSO3]	322.55	262.5	0.4349		[BMMIM][BF4]	[BMMIM]	[BF4]	323.15	0.0957	3.2e-05
[EMIM][MeSO3]	[EMIM]	[MeSO3]	303.95	247.5	0.4518		[BMMIM][BF4]	[BMMIM]	[BF4]	323.15	0.0486	0.00019
[EMIM][MeSO3]	[EMIM]	[MeSO3]	323.15	209.5	0.4153		[BMMIM][BF4]	[BMMIM]	[BF4]	323.15	0.197	0.0018
[EMIM][MeSO3]	[EMIM]	[MeSO3]	313.65	203.5	0.4349		[BMMIM][BF4]	[BMMIM]	[BF4]	323.15	0.499	0.0043
[EMIM][MeSO3]	[EMIM]	[MeSO3]	342.85	190.5	0.3741		[BMMIM][BF4]	[BMMIM]	[BF4]	323.15	0.598	0.0058
[EMIM][MeSO3]	[EMIM]	[MeSO3]	314.25	156.5	0.4153		[BMMIM][BF4]	[BMMIM]	[BF4]	323.15	0.999	0.01
[EMIM][MeSO3]	[EMIM]	[MeSO3]	332.75	147.5	0.3741		[BMMIM][BF4]	[BMMIM]	[BF4]	323.15	1.5	0.0138
[EMIM][MeSO3]	[EMIM]	[MeSO3]	303.55	133	0.4349		[BMMIM][BF4]	[BMMIM]	[BF4]	323.15	2	0.0205
[EMIM][MeSO3]	[EMIM]	[MeSO3]	342.25	117.5	0.3243		[BMMIM][BF4]	[BMMIM]	[BF4]	323.15	2.5	0.0257
[EMIM][MeSO3]	[EMIM]	[MeSO3]	323.15	107	0.3741		[BMMIM][BF4]	[BMMIM]	[BF4]	323.15	3	0.0299
[EMIM][MeSO3]	[EMIM]	[MeSO3]	304.65	95.5	0.4153		[BMMIM][BF4]	[BMMIM]	[BF4]	323.15	3.5	0.0344
[EMIM][MeSO3]	[EMIM]	[MeSO3]	332.55	95	0.3243		[BMMIM][BF4]	[BMMIM]	[BF4]	323.15	4	0.0395
[EMIM][MeSO3]	[EMIM]	[MeSO3]	342.55	79	0.2654		[BMMIM][BF4]	[BMMIM]	[BF4]	323.15	4.5	0.0432
[EMIM][MeSO3]	[EMIM]	[MeSO3]	313.15	78	0.3741		[BMMIM][BF4]	[BMMIM]	[BF4]	323.15	5	0.0484
[EMIM][MeSO3]	[EMIM]	[MeSO3]	323.05	76.5	0.3243		[BMMIM][BF4]	[BMMIM]	[BF4]	323.15	5.5	0.0522
[EMIM][MeSO3]	[EMIM]	[MeSO3]	332.35	66.5	0.2654		[BMMIM][BF4]	[BMMIM]	[BF4]	323.15	6	0.0571
[EMIM][MeSO3]	[EMIM]	[MeSO3]	313.45	61.5	0.3243		[BMMIM][BF4]	[BMMIM]	[BF4]	323.15	6.5	0.0608
[EMIM][MeSO3]	[EMIM]	[MeSO3]	303.05	58.5	0.3741		[BMMIM][BF4]	[BMMIM]	[BF4]	323.15	7	0.0657
[EMIM][MeSO3]	[EMIM]	[MeSO3]	322.85	55	0.2654		[BMMIM][BF4]	[BMMIM]	[BF4]	323.15	7.5	0.0695
[EMIM][MeSO3]	[EMIM]	[MeSO3]	342.45	50.5	0.1973		[BMMIM][BF4]	[BMMIM]	[BF4]	323.15	8	0.0738
[EMIM][MeSO3]	[EMIM]	[MeSO3]	303.55	48.5	0.3243		[BMMIM][BF4]	[BMMIM]	[BF4]	323.15	8.5	0.0774
[EMIM][MeSO3]	[EMIM]	[MeSO3]	313.45	45.5	0.2654		[BMMIM][BF4]	[BMMIM]	[BF4]	323.15	9	0.0819
[EMIM][MeSO3]	[EMIM]	[MeSO3]	332.65	42.5	0.1973		[BMMIM][BF4]	[BMMIM]	[BF4]	323.15	9.5	0.0858
[EMIM][MeSO3]	[EMIM]	[MeSO3]	342.25	37	0.1536		[BMMIM][BF4]	[BMMIM]	[BF4]	323.15	10	0.0891
[EMIM][MeSO3]	[EMIM]	[MeSO3]	303.35	36	0.2654		[BMMIM][BF4]	[BMMIM]	[BF4]	323.15	10.5	0.0926
[EMIM][MeSO3]	[EMIM]	[MeSO3]	323.05	35.5	0.1973		[BMMIM][BF4]	[BMMIM]	[BF4]	323.15	11	0.0982
[EMIM][MeSO3]	[EMIM]	[MeSO3]	332.55	31.5	0.1536		[BMMIM][BF4]	[BMMIM]	[BF4]	323.15	11.5	0.0984
[EMIM][MeSO3]	[EMIM]	[MeSO3]	313.15	29	0.1973		[BMMIM][BF4]	[BMMIM]	[BF4]	323.15	12	0.1036
[EMIM][MeSO3]	[EMIM]	[MeSO3]	322.25	26	0.1536		[BMMIM][BF4]	[BMMIM]	[BF4]	323.15	12.5	0.1072
[EMIM][MeSO3]	[EMIM]	[MeSO3]	342.45	24	0.1076		[BMMIM][BF4]	[BMMIM]	[BF4]	323.15	13	0.1098
[EMIM][MeSO3]	[EMIM]	[MeSO3]	302.25	23	0.1973		[BMMIM][BF4]	[BMMIM]	[BF4]	323.15	13	0.1101
[EMIM][MeSO3]	[EMIM]	[MeSO3]	312.45	21.5	0.1536		[BMMIM][PF6]	[BMMIM]	[PF6]	323.15	0.0038	0.0008
[EMIM][MeSO3]	[EMIM]	[MeSO3]	332.55	20.5	0.1076		[BMMIM][PF6]	[BMMIM]	[PF6]	323.15	0.199	0.00088
[EMIM][MeSO3]	[EMIM]	[MeSO3]	303.55	18	0.1536		[BMMIM][PF6]	[BMMIM]	[PF6]	323.15	0.097	0.0019
[EMIM][MeSO3]	[EMIM]	[MeSO3]	323.05	17	0.1076		[BMMIM][PF6]	[BMMIM]	[PF6]	323.15	0.6	0.0049
[EMIM][MeSO3]	[EMIM]	[MeSO3]	313.15	13.5	0.1076		[BMMIM][PF6]	[BMMIM]	[PF6]	323.15	0.501	0.0064
[EMIM][MeSO3]	[EMIM]	[MeSO3]	304.45	11	0.1076		[BMMIM][PF6]	[BMMIM]	[PF6]	323.15	1	0.0093
[EMIM][MeSO3]	[EMIM]	[MeSO3]	342.35	10	0.0556		[BMMIM][PF6]	[BMMIM]	[PF6]	323.15	1.5	0.0164
[EMIM][MeSO3]	[EMIM]	[MeSO3]	332.45	8	0.0556		[BMMIM][PF6]	[BMMIM]	[PF6]	323.15	2	0.0197
[EMIM][MeSO3]	[EMIM]	[MeSO3]	322.65	6.5	0.0556		[BMMIM][PF6]	[BMMIM]	[PF6]	323.15	2.5	0.0278
[EMIM][MeSO3]	[EMIM]	[MeSO3]	313.45	5	0.0556		[BMMIM][PF6]	[BMMIM]	[PF6]	323.15	3	0.0302
[EMIM][MeSO3]	[EMIM]	[MeSO3]	303.35	4	0.0556		[BMMIM][PF6]	[BMMIM]	[PF6]	323.15	3.5	0.0373
[MMIM][MeSO3]	[MMIM]	[MeSO3]	362.35	431	0.369		[BMMIM][PF6]	[BMMIM]	[PF6]	323.15	4	0.0401
[MMIM][MeSO3]	[MMIM]	[MeSO3]	352.45	403	0.369		[BMMIM][PF6]	[BMMIM]	[PF6]	323.15	4.5	0.0461
[MMIM][MeSO3]	[MMIM]	[MeSO3]	343.45	377	0.369		[BMMIM][PF6]	[BMMIM]	[PF6]	323.15	5	0.0495
[MMIM][MeSO3]	[MMIM]	[MeSO3]	362.25	352	0.3493		[BMMIM][PF6]	[BMMIM]	[PF6]	323.15	5.5	0.0559
[MMIM][MeSO3]	[MMIM]	[MeSO3]	333.65	341	0.369		[BMMIM][PF6]	[BMMIM]	[PF6]	323.15	6	0.0594
[MMIM][MeSO3]	[MMIM]	[MeSO3]	352.35	324.5	0.3493		[BMMIM][PF6]	[BMMIM]	[PF6]	323.15	6.5	0.0651
[MMIM][MeSO3]	[MMIM]	[MeSO3]	363.55	298.5	0.32		[BMMIM][PF6]	[BMMIM]	[PF6]	323.15	7	0.0684
[MMIM][MeSO3]	[MMIM]	[MeSO3]	342.85	295.5	0.3493		[BMMIM][PF6]	[BMMIM]	[PF6]	323.15	7.5	0.0734
[MMIM][MeSO3]	[MMIM]	[MeSO3]	353.15	269.5	0.32		[BMMIM][PF6]	[BMMIM]	[PF6]	323.15	8	0.0783
[MMIM][MeSO3]	[MMIM]	[MeSO3]	334.55	263.5	0.3493		[BMMIM][PF6]	[BMMIM]	[PF6]	323.15	8.5	0.0825
[MMIM][MeSO3]	[MMIM]	[MeSO3]	362.85	252	0.2929		[BMMIM][PF6]	[BMMIM]	[PF6]	323.15	9	0.0856
[MMIM][MeSO3]	[MMIM]	[MeSO3]	343.45	238.5	0.32		[BMMIM][PF6]	[BMMIM]	[PF6]	323.15	9.5	0.0912
[MMIM][MeSO3]	[MMIM]	[MeSO3]	353.55	224.5	0.2929		[BMMIM][PF6]	[BMMIM]	[PF6]	323.15	10	0.0964
[MMIM][MeSO3]	[MMIM]	[MeSO3]	335.25	208.5	0.32		[BMMIM][PF6]	[BMMIM]	[PF6]	323.15	10.5	0.0996
[MMIM][MeSO3]	[MMIM]	[MeSO3]	362.65	203	0.2608		[BMMIM][PF6]	[BMMIM]	[PF6]	323.15	11	0.1032
[MMIM][MeSO3]	[MMIM]	[MeSO3]	343.45	194	0.2929		[BMMIM][PF6]	[BMMIM]	[PF6]	323.15	11.5	0.1079
[MMIM][MeSO3]	[MMIM]	[MeSO3]	352.85	179	0.2608		[BMMIM][PF6]	[BMMIM]	[PF6]	323.15	12	0.1106
[MMIM][MeSO3]	[MMIM]	[MeSO3]	333.15	157	0.2929		[BMMIM][PF6]	[BMMIM]	[PF6]	323.15	12.5	0.1144
[MMIM][MeSO3]	[MMIM]	[MeSO3]	342.45	151	0.2608		[BMMIM][PF6]	[BMMIM]	[PF6]	323.15	13	0.119
[MMIM][MeSO3]	[MMIM]	[MeSO3]	362.35	143.5	0.2289		[BMMIM][PF6]	[BMMIM]	[PF6]	323.15	13	0.1191
[MMIM][MeSO3]	[MMIM]	[MeSO3]	353.25	124.5	0.2289		[C3OHMIM][Tf2N]	[C3OHMIM]	[Tf2N]	323.15	0.199	0.004
[MMIM][MeSO3]	[MMIM]	[MeSO3]	332.85	120	0.2608		[C3OHMIM][Tf2N]	[C3OHMIM]	[Tf2N]	323.15	0.503	0.008
[MMIM][MeSO3]	[MMIM]	[MeSO3]	362.35	107.5	0.2035		[C3OHMIM][Tf2N]	[C3OHMIM]	[Tf2N]	323.15	0.93	0.0145
[MMIM][MeSO3]	[MMIM]	[MeSO3]	343.55	107	0.2289		[C3OHMIM][Tf2N]	[C3OHMIM]	[Tf2N]	323.15	0.997	0.015
[MMIM][MeSO3]	[MMIM]	[MeSO3]	352.55	93	0.2035		[C3OHMIM][Tf2N]	[C3OHMIM]	[Tf2N]	323.15	1.95	0.0302
[MMIM][MeSO3]	[MMIM]	[MeSO3]	333.75	89.5	0.2289		[C3OHMIM][Tf2N]	[C3OHMIM]	[Tf2N]	323.15	1.998	0.031
[MMIM][MeSO3]	[MMIM]	[MeSO3]	363.65	82.5	0.1667		[C3OHMIM][Tf2N]	[C3OHMIM]	[Tf2N]	323.15	2.93	0.0449
[MMIM][MeSO3]	[MMIM]	[MeSO3]	342.75	81	0.2035		[C3OHMIM][Tf2N]	[C3OHMIM]	[Tf2N]	323.15	3.93	0.0602
[MMIM][MeSO3]	[MMIM]	[MeSO3]	352.05	71.5	0.1667		[C3OHMIM][Tf2N]	[C3OHMIM]	[Tf2N]	323.15	3.998	0.062
[MMIM][MeSO3]	[MMIM]	[MeSO3]	334.05	69	0.2035		[C3OHMIM][Tf2N]	[C3OHMIM]	[Tf2N]	323.15	4.93	0.0749
[MMIM][MeSO3]	[MMIM]	[MeSO3]	342.45	62.5	0.1667		[C3OHMIM][Tf2N]	[C3OHMIM]	[Tf2N]	323.15	5.94	0.0893
[MMIM][MeSO3]	[MMIM]	[MeSO3]	333.25	53.5	0.1667		[C3OHMIM][Tf2N]	[C3OHMIM]	[Tf2N]	323.15	5.991	0.091
[MMIM][MeSO3]	[MMIM]	[MeSO3]	362.35	51	0.1166		[C3OHMIM][Tf2N]	[C3OHMIM]	[Tf2N]	323.15	6.92	0.1025
[MMIM][MeSO3]	[MMIM]	[MeSO3]	353.35	45.5	0.1166		[C3OHMIM][Tf2N]	[C3OHMIM]	[Tf2N]	323.15	7.93	0.1159
[MMIM][MeSO3]	[MMIM]	[MeSO3]	342.85	39.5	0.1166		[C3OHMIM][Tf2N]	[C3OHMIM]	[Tf2N]	323.15	7.997	0.119
[MMIM][MeSO3]	[MMIM]	[MeSO3]	333.65	34	0.1166		[C3OHMIM][Tf2N]	[C3OHMIM]	[Tf2N]	323.15	8.92	0.1292
[MMIM][MeSO3]	[MMIM]	[MeSO3]	362.95	23	0.0629		[C3OHMIM][Tf2N]	[C3OHMIM]	[Tf2N]	323.15	9.92	0.1425
[MMIM][MeSO3]	[MMIM]	[MeSO3]	354.25	20.5	0.0629		[C3OHMIM][Tf2N]	[C3OHMIM]	[Tf2N]	323.15	10.011	0.145
[MMIM][MeSO3]	[MMIM]	[MeSO3]	344.25	18	0.0629		[C3OHMIM][Tf2N]	[C3OHMIM]	[Tf2N]	323.15	10.92	0.1547
[MMIM][MeSO3]	[MMIM]	[MeSO3]	334.45	16.5	0.0629		[C3OHMIM][Tf2N]	[C3OHMIM]	[Tf2N]	323.15	11.92	0.1663
[BMIM][BF4]	[BMIM]	[BF4]	344.49	0.8443	0.00971		[C3OHMIM][Tf2N]	[C3OHMIM]	[Tf2N]	323.15	12.92	0.1782
[BMIM][BF4]	[BMIM]	[BF4]	334.38	0.8188	0.00977		[C3OHMIM][Tf2N]	[C3OHMIM]	[Tf2N]	323.15	13.92	0.1896
[BMIM][BF4]	[BMIM]	[BF4]	324.12	0.7847	0.011		[C3OHMIM][Tf2N]	[C3OHMIM]	[Tf2N]	323.15	14.92	0.2013
[BMIM][BF4]	[BMIM]	[BF4]	303.72	0.7724	0.0127		[C3OHMIM][Tf2N]	[C3OHMIM]	[Tf2N]	323.15	15.93	0.2123
[BMIM][BF4]	[BMIM]	[BF4]	313.89	0.756	0.0122		[C3OHMIM][Tf2N]	[C3OHMIM]	[Tf2N]	323.15	16.93	0.2235
[BMIM][BF4]	[BMIM]	[BF4]	303.72	0.726	0.0133		[C3OHMIM][Tf2N]	[C3OHMIM]	[Tf2N]	323.15	17.92	0.2339
[BMIM][BF4]	[BMIM]	[BF4]	344.49	0.4497	0.00511		[C3OHMIM][Tf2N]	[C3OHMIM]	[Tf2N]	323.15	18.92	0.2444
[BMIM][BF4]	[BMIM]	[BF4]	334.38	0.4355	0.00536		[C3OHMIM][Tf2N]	[C3OHMIM]	[Tf2N]	323.15	19.93	0.254
[BMIM][BF4]	[BMIM]	[BF4]	344.49	0.4267	0.00474		[C4PY][NO3]	[C4PY]	[NO3]	323.15	2.8	0.024
[BMIM][BF4]	[BMIM]	[BF4]	324.12	0.4212	0.00559		[C4PY][NO3]	[C4PY]	[NO3]	323.15	4.92	0.042
[BMIM][BF4]	[BMIM]	[BF4]	334.38	0.4134	0.00489		[C4PY][NO3]	[C4PY]	[NO3]	323.15	6.84	0.06
[BMIM][BF4]	[BMIM]	[BF4]	313.89	0.4065	0.00594		[C4PY][NO3]	[C4PY]	[NO3]	323.15	9.06	0.079
[BMIM][BF4]	[BMIM]	[BF4]	324.12	0.3999	0.00508		[C4PY][NO3]	[C4PY]	[NO3]	323.15	11.95	0.102
[BMIM][BF4]	[BMIM]	[BF4]	303.72	0.3914	0.00652		[C4PY][NO3]	[C4PY]	[NO3]	323.15	14.83	0.125
[BMIM][BF4]	[BMIM]	[BF4]	313.89	0.386	0.00543		[C4PY][NO3]	[C4PY]	[NO3]	323.15	19.58	0.161
[BMIM][BF4]	[BMIM]	[BF4]	303.72	0.3721	0.00581		[C4PY][SCN]	[C4PY]	[SCN]	323.15	4.1	0.031
[BMIM][BF4]	[BMIM]	[BF4]	344.49	0.2033	0.00236		[C4PY][SCN]	[C4PY]	[SCN]	323.15	6.84	0.05
[BMIM][BF4]	[BMIM]	[BF4]	334.38	0.197	0.00243		[C4PY][SCN]	[C4PY]	[SCN]	323.15	10.42	0.075
[BMIM][BF4]	[BMIM]	[BF4]	324.12	0.1906	0.00255		[C4PY][SCN]	[C4PY]	[SCN]	323.15	12.95	0.094
[BMIM][BF4]	[BMIM]	[BF4]	313.89	0.184	0.00271		[C4PY][SCN]	[C4PY]	[SCN]	323.15	16.13	0.115
[BMIM][BF4]	[BMIM]	[BF4]	303.72	0.1773	0.00295		[C4PY][SCN]	[C4PY]	[SCN]	323.15	20.64	0.145
[BMIM][BF4]	[BMIM]	[BF4]	333.3	85	0.4483		[BVIM][Tf2N]	[BVIM]	[Tf2N]	323.2	9.1	0.125
[BMIM][BF4]	[BMIM]	[BF4]	313.3	84.02	0.5289		[BVIM][Tf2N]	[BVIM]	[Tf2N]	323.2	17.4	0.286
[BMIM][BF4]	[BMIM]	[BF4]	313.3	74.24	0.4826		[BVIM][Tf2N]	[BVIM]	[Tf2N]	323.2	24.1	0.354
[BMIM][BF4]	[BMIM]	[BF4]	333.3	72.32	0.3765		[BVIM][Tf2N]	[BVIM]	[Tf2N]	323.2	31.5	0.418
[BMIM][BF4]	[BMIM]	[BF4]	313.3	63.17	0.4475		[BVIM][Tf2N]	[BVIM]	[Tf2N]	323.2	42.9	0.495
[BMIM][BF4]	[BMIM]	[BF4]	333.3	60.96	0.3173		[BVIM][Tf2N]	[BVIM]	[Tf2N]	323.2	56.2	0.562
[BMIM][BF4]	[BMIM]	[BF4]	313.3	52.78	0.4004		[BVIM][Tf2N]	[BVIM]	[Tf2N]	323.2	75.7	0.64
[BMIM][BF4]	[BMIM]	[BF4]	298.2	51.21	0.5138		[BVIM][Tf2N]	[BVIM]	[Tf2N]	323.2	122.2	0.73
[BMIM][BF4]	[BMIM]	[BF4]	333.3	48.6	0.266		[EMIM][BETI]	[EMIM]	[BETA]	323.2	5.9	0.124
[BMIM][BF4]	[BMIM]	[BF4]	298.2	42.1	0.4902		[EMIM][BETI]	[EMIM]	[BETA]	323.2	14.3	0.235
[BMIM][BF4]	[BMIM]	[BF4]	313.3	41.7	0.3489		[EMIM][BETI]	[EMIM]	[BETA]	323.2	24.6	0.338
[BMIM][BF4]	[BMIM]	[BF4]	333.3	35.01	0.2045		[EMIM][BETI]	[EMIM]	[BETA]	323.2	31.5	0.401
[BMIM][BF4]	[BMIM]	[BF4]	298.2	31.83	0.4112		[EMIM][BETI]	[EMIM]	[BETA]	323.2	48.8	0.505
[BMIM][BF4]	[BMIM]	[BF4]	313.3	31.44	0.2863		[EMIM][BETI]	[EMIM]	[BETA]	323.2	61.1	0.571
[BMIM][BF4]	[BMIM]	[BF4]	333.3	24.56	0.1456		[EMIM][BETI]	[EMIM]	[BETA]	323.2	95.6	0.679
[BMIM][BF4]	[BMIM]	[BF4]	298.2	22.25	0.3188		[EMIM][BETI]	[EMIM]	[BETA]	323.2	148	0.733
[BMIM][BF4]	[BMIM]	[BF4]	313.3	22.05	0.2226		[HMIM][BETI]	[HMIM]	[BETA]	323.2	9	0.226
[BMIM][BF4]	[BMIM]	[BF4]	333.3	14.22	0.0928		[HMIM][BETI]	[HMIM]	[BETA]	323.2	15.4	0.321
[BMIM][BF4]	[BMIM]	[BF4]	313.3	12.74	0.137		[HMIM][BETI]	[HMIM]	[BETA]	323.2	24.5	0.419
[BMIM][BF4]	[BMIM]	[BF4]	298.2	12.09	0.1928		[HMIM][BETI]	[HMIM]	[BETA]	323.2	33.7	0.493
[BMIM][DCA]	[BMIM]	[DCA]	313.3	115.29	0.5636		[HMIM][BETI]	[HMIM]	[BETA]	323.2	37.7	0.522
[BMIM][DCA]	[BMIM]	[DCA]	333.3	114.84	0.5264		[HMIM][BETI]	[HMIM]	[BETA]	323.2	50.6	0.601
[BMIM][DCA]	[BMIM]	[DCA]	333.3	97.45	0.4976		[HMIM][BETI]	[HMIM]	[BETA]	323.2	61.2	0.647
[BMIM][DCA]	[BMIM]	[DCA]	313.3	95.34	0.5565		[HMIM][BETI]	[HMIM]	[BETA]	323.2	70.3	0.689
[BMIM][DCA]	[BMIM]	[DCA]	333.3	83.9	0.458		[HMIM][BETI]	[HMIM]	[BETA]	323.2	87.6	0.749
[BMIM][DCA]	[BMIM]	[DCA]	313.3	83.68	0.5207		[C4PY][NO3]	[C4PY]	[NO3]	333.15	2.53	0.023
[BMIM][DCA]	[BMIM]	[DCA]	313.3	70.17	0.474		[C4PY][NO3]	[C4PY]	[NO3]	333.15	4.06	0.038
[BMIM][DCA]	[BMIM]	[DCA]	333.3	69.96	0.3984		[C4PY][NO3]	[C4PY]	[NO3]	333.15	7.01	0.062
[BMIM][DCA]	[BMIM]	[DCA]	298.2	59.43	0.5149		[C4PY][NO3]	[C4PY]	[NO3]	333.15	11.52	0.096
[BMIM][DCA]	[BMIM]	[DCA]	333.3	56.45	0.3466		[C4PY][NO3]	[C4PY]	[NO3]	333.15	14.77	0.119
[BMIM][DCA]	[BMIM]	[DCA]	313.3	56.32	0.4117		[C4PY][NO3]	[C4PY]	[NO3]	333.15	16.87	0.135
[BMIM][DCA]	[BMIM]	[DCA]	298.2	44.29	0.4365		[C4PY][NO3]	[C4PY]	[NO3]	333.15	19.88	0.157
[BMIM][DCA]	[BMIM]	[DCA]	313.2	42.86	0.3532		[C4PY][SCN]	[C4PY]	[SCN]	333.15	2.65	0.019
[BMIM][DCA]	[BMIM]	[DCA]	333.3	42.17	0.2849		[C4PY][SCN]	[C4PY]	[SCN]	333.15	4.16	0.03
[BMIM][DCA]	[BMIM]	[DCA]	298.2	34.84	0.3781		[C4PY][SCN]	[C4PY]	[SCN]	333.15	7.42	0.054
[BMIM][DCA]	[BMIM]	[DCA]	333.2	28.88	0.2181		[C4PY][SCN]	[C4PY]	[SCN]	333.15	9.12	0.067
[BMIM][DCA]	[BMIM]	[DCA]	313.3	28.29	0.2575		[C4PY][SCN]	[C4PY]	[SCN]	333.15	12.12	0.086
[BMIM][DCA]	[BMIM]	[DCA]	298.2	24.86	0.2886		[C4PY][SCN]	[C4PY]	[SCN]	333.15	15.15	0.106
[BMIM][DCA]	[BMIM]	[DCA]	333.3	18.3	0.1543		[C4PY][SCN]	[C4PY]	[SCN]	333.15	19.6	0.133
[BMIM][DCA]	[BMIM]	[DCA]	313.3	14.16	0.1582		[EMIM][MeSO3]	[EMIM]	[MeSO3]	333.15	4.11	0.0284
[BMIM][DCA]	[BMIM]	[DCA]	298.2	12.71	0.1598		[EMIM][MeSO3]	[EMIM]	[MeSO3]	333.15	12.08	0.081
[BMIM][methide]	[BMIM]	[methide]	313.3	114.27	0.774		[EMIM][MeSO3]	[EMIM]	[MeSO3]	333.15	25.39	0.1587
[BMIM][methide]	[BMIM]	[methide]	333.3	111.16	0.7401		[EMIM][MeSO3]	[EMIM]	[MeSO3]	333.15	48.47	0.2462
[BMIM][methide]	[BMIM]	[methide]	333.3	99.01	0.7067		[BVIM][Tf2N]	[BVIM]	[Tf2N]	333.2	9.8	0.125
[BMIM][methide]	[BMIM]	[methide]	313.2	98.26	0.7652		[BVIM][Tf2N]	[BVIM]	[Tf2N]	333.2	20.3	0.286
[BMIM][methide]	[BMIM]	[methide]	333.3	83.8	0.6702		[BVIM][Tf2N]	[BVIM]	[Tf2N]	333.2	28	0.354
[BMIM][methide]	[BMIM]	[methide]	313.2	83.66	0.7379		[BVIM][Tf2N]	[BVIM]	[Tf2N]	333.2	36.5	0.418
[BMIM][methide]	[BMIM]	[methide]	333.3	70.47	0.624		[BVIM][Tf2N]	[BVIM]	[Tf2N]	333.2	50.8	0.495
[BMIM][methide]	[BMIM]	[methide]	313.2	70.29	0.6946		[BVIM][Tf2N]	[BVIM]	[Tf2N]	333.2	66.6	0.562
[BMIM][methide]	[BMIM]	[methide]	298.3	61.73	0.741		[BVIM][Tf2N]	[BVIM]	[Tf2N]	333.2	88	0.64
[BMIM][methide]	[BMIM]	[methide]	333.3	58.12	0.5706		[BVIM][Tf2N]	[BVIM]	[Tf2N]	333.2	163	0.73
[BMIM][methide]	[BMIM]	[methide]	313.2	57.58	0.6387		[EMIM][BETI]	[EMIM]	[BETA]	333.2	6.5	0.124
[BMIM][methide]	[BMIM]	[methide]	333.3	46.49	0.5015		[EMIM][BETI]	[EMIM]	[BETA]	333.2	15.8	0.235
[BMIM][methide]	[BMIM]	[methide]	313.2	44.62	0.5648		[EMIM][BETI]	[EMIM]	[BETA]	333.2	27.8	0.338
[BMIM][methide]	[BMIM]	[methide]	298.2	41.98	0.6485		[EMIM][BETI]	[EMIM]	[BETA]	333.2	35.8	0.401
[BMIM][methide]	[BMIM]	[methide]	313.2	32.76	0.4828		[EMIM][BETI]	[EMIM]	[BETA]	333.2	55.3	0.505
[BMIM][methide]	[BMIM]	[methide]	333.3	32.32	0.4106		[EMIM][BETI]	[EMIM]	[BETA]	333.2	71.3	0.571
[BMIM][methide]	[BMIM]	[methide]	298.2	31.36	0.5665		[EMIM][BETI]	[EMIM]	[BETA]	333.2	119.6	0.679
[BMIM][methide]	[BMIM]	[methide]	298.2	20.72	0.4844		[EMIM][BETI]	[EMIM]	[BETA]	333.2	185.1	0.733
[BMIM][methide]	[BMIM]	[methide]	313.2	18.75	0.3153		[HMIM][BETI]	[HMIM]	[BETA]	333.2	10.4	0.226
[BMIM][methide]	[BMIM]	[methide]	333.3	17.12	0.277		[HMIM][BETI]	[HMIM]	[BETA]	333.2	17.8	0.321
[BMIM][methide]	[BMIM]	[methide]	298.2	12.58	0.3672		[HMIM][BETI]	[HMIM]	[BETA]	333.2	28.3	0.419
[BMIM][NO3]	[BMIM]	[NO3]	313.2	93.16	0.4704		[HMIM][BETI]	[HMIM]	[BETA]	333.2	39.9	0.493
[BMIM][NO3]	[BMIM]	[NO3]	333.1	88.92	0.4163		[HMIM][BETI]	[HMIM]	[BETA]	333.2	44.2	0.522
[BMIM][NO3]	[BMIM]	[NO3]	313.3	70.99	0.3902		[HMIM][BETI]	[HMIM]	[BETA]	333.2	58.6	0.601
[BMIM][NO3]	[BMIM]	[NO3]	333.1	70.27	0.3224		[HMIM][BETI]	[HMIM]	[BETA]	333.2	71.1	0.647
[BMIM][NO3]	[BMIM]	[NO3]	333.1	56.43	0.267		[HMIM][BETI]	[HMIM]	[BETA]	333.2	82.7	0.689
[BMIM][NO3]	[BMIM]	[NO3]	313.3	56.23	0.3295		[HMIM][BETI]	[HMIM]	[BETA]	333.2	108	0.749
[BMIM][NO3]	[BMIM]	[NO3]	298.2	56.21	0.4073		[AIM][Tf2N]	[AIM]	[Tf2N]	343.15	0.195	0.003
[BMIM][NO3]	[BMIM]	[NO3]	298.2	42	0.331		[AIM][Tf2N]	[AIM]	[Tf2N]	343.15	0.497	0.006
[BMIM][NO3]	[BMIM]	[NO3]	333.1	41.53	0.2058		[AIM][Tf2N]	[AIM]	[Tf2N]	343.15	0.998	0.014
[BMIM][NO3]	[BMIM]	[NO3]	313.3	40.69	0.2595		[AIM][Tf2N]	[AIM]	[Tf2N]	343.15	1.999	0.028
[BMIM][NO3]	[BMIM]	[NO3]	298.2	29.51	0.2479		[AIM][Tf2N]	[AIM]	[Tf2N]	343.15	4.003	0.052
[BMIM][NO3]	[BMIM]	[NO3]	313.3	26.98	0.1868		[AIM][Tf2N]	[AIM]	[Tf2N]	343.15	5.997	0.077
[BMIM][NO3]	[BMIM]	[NO3]	333.2	26.92	0.133		[AIM][Tf2N]	[AIM]	[Tf2N]	343.15	7.999	0.101
[BMIM][NO3]	[BMIM]	[NO3]	298.2	19.62	0.1807		[AIM][Tf2N]	[AIM]	[Tf2N]	343.15	9.999	0.122
[BMIM][NO3]	[BMIM]	[NO3]	333.1	13.11	0.0692		[AIM][Tf2N]	[AIM]	[Tf2N]	343.15	11.996	0.146
[BMIM][NO3]	[BMIM]	[NO3]	313.3	12.8	0.1038		[AIM][Tf2N]	[AIM]	[Tf2N]	343.15	13.985	0.164
[BMIM][NO3]	[BMIM]	[NO3]	298.2	10.31	0.0992		[AIM][Tf2N]	[AIM]	[Tf2N]	343.15	14.994	0.174
[BMIM][PF6]	[BMIM]	[PF6]	313.3	146.39	0.6503		[C3OHMIM][Tf2N]	[C3OHMIM]	[Tf2N]	343.15	0.199	0.003
[BMIM][PF6]	[BMIM]	[PF6]	333.3	132.37	0.5552		[C3OHMIM][Tf2N]	[C3OHMIM]	[Tf2N]	343.15	0.502	0.005
[BMIM][PF6]	[BMIM]	[PF6]	313.3	128.15	0.6466		[C3OHMIM][Tf2N]	[C3OHMIM]	[Tf2N]	343.15	0.998	0.011
[BMIM][PF6]	[BMIM]	[PF6]	333.3	121.97	0.5331		[C3OHMIM][Tf2N]	[C3OHMIM]	[Tf2N]	343.15	1.996	0.023
[BMIM][PF6]	[BMIM]	[PF6]	313.3	112.19	0.6314		[C3OHMIM][Tf2N]	[C3OHMIM]	[Tf2N]	343.15	3.993	0.045
[BMIM][PF6]	[BMIM]	[PF6]	333.3	104.5	0.513		[C3OHMIM][Tf2N]	[C3OHMIM]	[Tf2N]	343.15	6.004	0.067
[BMIM][PF6]	[BMIM]	[PF6]	313.3	95.47	0.5991		[C3OHMIM][Tf2N]	[C3OHMIM]	[Tf2N]	343.15	8.004	0.088
[BMIM][PF6]	[BMIM]	[PF6]	313.3	87.4	0.6265		[C3OHMIM][Tf2N]	[C3OHMIM]	[Tf2N]	343.15	10.003	0.108
[BMIM][PF6]	[BMIM]	[PF6]	333.3	87.18	0.4838		[C3OHMIM][Tf2N]	[C3OHMIM]	[Tf2N]	343.15	11.007	0.117
[BMIM][PF6]	[BMIM]	[PF6]	313.3	87.13	0.6359		[C3OHMIM][Tf2N]	[C3OHMIM]	[Tf2N]	343.15	12.01	0.121
[BMIM][PF6]	[BMIM]	[PF6]	313.3	85.19	0.6113		[BVIM][Tf2N]	[BVIM]	[Tf2N]	343.2	10.5	0.125
[BMIM][PF6]	[BMIM]	[PF6]	313.3	84.01	0.5941		[BVIM][Tf2N]	[BVIM]	[Tf2N]	343.2	23.8	0.286
[BMIM][PF6]	[BMIM]	[PF6]	313.3	80.31	0.5799		[BVIM][Tf2N]	[BVIM]	[Tf2N]	343.2	32.4	0.354
[BMIM][PF6]	[BMIM]	[PF6]	333.4	76.74	0.4405		[BVIM][Tf2N]	[BVIM]	[Tf2N]	343.2	41.7	0.418
[BMIM][PF6]	[BMIM]	[PF6]	333.3	76.26	0.4883		[BVIM][Tf2N]	[BVIM]	[Tf2N]	343.2	59.1	0.495
[BMIM][PF6]	[BMIM]	[PF6]	313.3	75.09	0.558		[BVIM][Tf2N]	[BVIM]	[Tf2N]	343.2	77.7	0.562
[BMIM][PF6]	[BMIM]	[PF6]	333.3	75.05	0.4583		[BVIM][Tf2N]	[BVIM]	[Tf2N]	343.2	104.9	0.64
[BMIM][PF6]	[BMIM]	[PF6]	313.3	73.3	0.5691		[BVIM][Tf2N]	[BVIM]	[Tf2N]	343.2	195.9	0.73
[BMIM][PF6]	[BMIM]	[PF6]	333.2	72.7	0.4586		[EMIM][BETI]	[EMIM]	[BETA]	343.2	7.2	0.124
[BMIM][PF6]	[BMIM]	[PF6]	313.3	72.15	0.5555		[EMIM][BETI]	[EMIM]	[BETA]	343.2	17.3	0.235
[BMIM][PF6]	[BMIM]	[PF6]	333.3	70.24	0.4273		[EMIM][BETI]	[EMIM]	[BETA]	343.2	31.2	0.338
[BMIM][PF6]	[BMIM]	[PF6]	313.3	69.81	0.5463		[EMIM][BETI]	[EMIM]	[BETA]	343.2	40.5	0.401
[BMIM][PF6]	[BMIM]	[PF6]	312.9	64.61	0.5179		[EMIM][BETI]	[EMIM]	[BETA]	343.2	62.7	0.505
[BMIM][PF6]	[BMIM]	[PF6]	333.3	63.69	0.4305		[EMIM][BETI]	[EMIM]	[BETA]	343.2	82.7	0.571
[BMIM][PF6]	[BMIM]	[PF6]	313.3	63.12	0.5172		[EMIM][BETI]	[EMIM]	[BETA]	343.2	141.7	0.679
[BMIM][PF6]	[BMIM]	[PF6]	333.3	62.77	0.3806		[EMIM][BETI]	[EMIM]	[BETA]	343.2	225	0.733
[BMIM][PF6]	[BMIM]	[PF6]	313.3	61.1	0.5176		[HMIM][BETI]	[HMIM]	[BETA]	343.2	12.3	0.226
[BMIM][PF6]	[BMIM]	[PF6]	333.3	59.88	0.4038		[HMIM][BETI]	[HMIM]	[BETA]	343.2	20.9	0.321
[BMIM][PF6]	[BMIM]	[PF6]	313.3	57.33	0.4962		[HMIM][BETI]	[HMIM]	[BETA]	343.2	33	0.419
[BMIM][PF6]	[BMIM]	[PF6]	333.2	57.33	0.3989		[HMIM][BETI]	[HMIM]	[BETA]	343.2	46.2	0.493
[BMIM][PF6]	[BMIM]	[PF6]	313.3	54.29	0.477		[HMIM][BETI]	[HMIM]	[BETA]	343.2	51.1	0.522
[BMIM][PF6]	[BMIM]	[PF6]	333.3	54.21	0.391		[HMIM][BETI]	[HMIM]	[BETA]	343.2	68.2	0.601
[BMIM][PF6]	[BMIM]	[PF6]	298.2	53.71	0.5667		[HMIM][BETI]	[HMIM]	[BETA]	343.2	82.7	0.647
[BMIM][PF6]	[BMIM]	[PF6]	313.3	52.05	0.4728		[HMIM][BETI]	[HMIM]	[BETA]	343.2	95.4	0.689
[BMIM][PF6]	[BMIM]	[PF6]	333.3	51.57	0.3564		[HMIM][BETI]	[HMIM]	[BETA]	343.2	131	0.749
[BMIM][PF6]	[BMIM]	[PF6]	313.3	50.2	0.4647		[EMIM][MeSO3]	[EMIM]	[MeSO3]	353.15	4.18	0.0235
[BMIM][PF6]	[BMIM]	[PF6]	333.3	47.47	0.3156		[EMIM][MeSO3]	[EMIM]	[MeSO3]	353.15	12.28	0.0682
[BMIM][PF6]	[BMIM]	[PF6]	313.3	44.76	0.4405		[EMIM][MeSO3]	[EMIM]	[MeSO3]	353.15	25.81	0.1328
[BMIM][PF6]	[BMIM]	[PF6]	333.3	44.11	0.3425		[EMIM][MeSO3]	[EMIM]	[MeSO3]	353.15	49.13	0.2028
[BMIM][PF6]	[BMIM]	[PF6]	333.3	44.1	0.3419		[BVIM][Tf2N]	[BVIM]	[Tf2N]	353.2	11.2	0.125
[BMIM][PF6]	[BMIM]	[PF6]	313.3	42.44	0.4294		[BVIM][Tf2N]	[BVIM]	[Tf2N]	353.2	26.9	0.286
[BMIM][PF6]	[BMIM]	[PF6]	313.3	42.16	0.4371		[BVIM][Tf2N]	[BVIM]	[Tf2N]	353.2	37.1	0.354
[BMIM][PF6]	[BMIM]	[PF6]	298.2	42	0.4905		[BVIM][Tf2N]	[BVIM]	[Tf2N]	353.2	48.1	0.418
[BMIM][PF6]	[BMIM]	[PF6]	333.3	39.49	0.3231		[BVIM][Tf2N]	[BVIM]	[Tf2N]	353.2	68.2	0.495
[BMIM][PF6]	[BMIM]	[PF6]	313.3	39.45	0.3985		[BVIM][Tf2N]	[BVIM]	[Tf2N]	353.2	89.2	0.562
[BMIM][PF6]	[BMIM]	[PF6]	313.3	35.76	0.4018		[BVIM][Tf2N]	[BVIM]	[Tf2N]	353.2	123	0.64
[BMIM][PF6]	[BMIM]	[PF6]	333.3	33.61	0.2794		[BVIM][Tf2N]	[BVIM]	[Tf2N]	353.2	231.2	0.73
[BMIM][PF6]	[BMIM]	[PF6]	333.3	32.53	0.2342		[EMIM][BETI]	[EMIM]	[BETA]	353.2	7.9	0.124
[BMIM][PF6]	[BMIM]	[PF6]	333.3	32.11	0.3037		[EMIM][BETI]	[EMIM]	[BETA]	353.2	19.1	0.235
[BMIM][PF6]	[BMIM]	[PF6]	298.2	31.84	0.4235		[EMIM][BETI]	[EMIM]	[BETA]	353.2	34.5	0.338
[BMIM][PF6]	[BMIM]	[PF6]	313.3	31.52	0.3615		[EMIM][BETI]	[EMIM]	[BETA]	353.2	45.7	0.401
[BMIM][PF6]	[BMIM]	[PF6]	333.3	28.85	0.2627		[EMIM][BETI]	[EMIM]	[BETA]	353.2	72.5	0.505
[BMIM][PF6]	[BMIM]	[PF6]	313.3	28.59	0.3131		[EMIM][BETI]	[EMIM]	[BETA]	353.2	94.9	0.571
[BMIM][PF6]	[BMIM]	[PF6]	313.3	28.06	0.3642		[EMIM][BETI]	[EMIM]	[BETA]	353.2	168.8	0.679
[BMIM][PF6]	[BMIM]	[PF6]	313.3	24.65	0.3031		[EMIM][BETI]	[EMIM]	[BETA]	353.2	262	0.733
[BMIM][PF6]	[BMIM]	[PF6]	333.3	24.52	0.2221		[HMIM][BETI]	[HMIM]	[BETA]	353.2	14	0.226
[BMIM][PF6]	[BMIM]	[PF6]	333.3	21.52	0.2423		[HMIM][BETI]	[HMIM]	[BETA]	353.2	24.2	0.321
[BMIM][PF6]	[BMIM]	[PF6]	313.2	21.17	0.2879		[HMIM][BETI]	[HMIM]	[BETA]	353.2	37.8	0.419
[BMIM][PF6]	[BMIM]	[PF6]	298.2	20.98	0.3188		[HMIM][BETI]	[HMIM]	[BETA]	353.2	51.9	0.493
[BMIM][PF6]	[BMIM]	[PF6]	313.3	19.66	0.3125		[HMIM][BETI]	[HMIM]	[BETA]	353.2	58.5	0.522
[BMIM][PF6]	[BMIM]	[PF6]	333.3	17.41	0.1716		[HMIM][BETI]	[HMIM]	[BETA]	353.2	78.9	0.601
[BMIM][PF6]	[BMIM]	[PF6]	313.3	15.68	0.1845		[HMIM][BETI]	[HMIM]	[BETA]	353.2	94.5	0.647
[BMIM][PF6]	[BMIM]	[PF6]	333.3	14.65	0.1451		[HMIM][BETI]	[HMIM]	[BETA]	353.2	112	0.689
[BMIM][PF6]	[BMIM]	[PF6]	333.3	14.48	0.1279		[HMIM][BETI]	[HMIM]	[BETA]	353.2	155	0.749
[BMIM][PF6]	[BMIM]	[PF6]	313.3	13.97	0.2126		[BVIM][Tf2N]	[BVIM]	[Tf2N]	363.2	11.9	0.125
[BMIM][PF6]	[BMIM]	[PF6]	313.3	13.95	0.1988		[BVIM][Tf2N]	[BVIM]	[Tf2N]	363.2	30.4	0.286
[BMIM][PF6]	[BMIM]	[PF6]	298.2	13.31	0.2073		[BVIM][Tf2N]	[BVIM]	[Tf2N]	363.2	42	0.354
[BMIM][PF6]	[BMIM]	[PF6]	313.3	11.09	0.1978		[BVIM][Tf2N]	[BVIM]	[Tf2N]	363.2	53.8	0.418
[BMIM][PF6]	[BMIM]	[PF6]	333.3	10.95	0.1342		[BVIM][Tf2N]	[BVIM]	[Tf2N]	363.2	77	0.495
[BMIM][PF6]	[BMIM]	[PF6]	313.3	5.6	0.0897		[BVIM][Tf2N]	[BVIM]	[Tf2N]	363.2	102	0.562
[BMIM][Tf2N]	[BMIM]	[Tf2N]	313.3	132.43	0.7521		[BVIM][Tf2N]	[BVIM]	[Tf2N]	363.2	141.3	0.64
[BMIM][Tf2N]	[BMIM]	[Tf2N]	333.3	130.19	0.7189		[BVIM][Tf2N]	[BVIM]	[Tf2N]	363.2	261.9	0.73
[BMIM][Tf2N]	[BMIM]	[Tf2N]	333.3	111.12	0.6894		[EMIM][BETI]	[EMIM]	[BETA]	363.2	8.5	0.124
[BMIM][Tf2N]	[BMIM]	[Tf2N]	313.3	110.25	0.742		[EMIM][BETI]	[EMIM]	[BETA]	363.2	20.8	0.235
[BMIM][Tf2N]	[BMIM]	[Tf2N]	333.3	94.44	0.6609		[EMIM][BETI]	[EMIM]	[BETA]	363.2	38	0.338
[BMIM][Tf2N]	[BMIM]	[Tf2N]	313.3	89.97	0.7072		[EMIM][BETI]	[EMIM]	[BETA]	363.2	51.2	0.401
[BMIM][Tf2N]	[BMIM]	[Tf2N]	333.3	87.14	0.6487		[EMIM][BETI]	[EMIM]	[BETA]	363.2	81.1	0.505
[BMIM][Tf2N]	[BMIM]	[Tf2N]	333.3	80.97	0.6194		[EMIM][BETI]	[EMIM]	[BETA]	363.2	108.6	0.571
[BMIM][Tf2N]	[BMIM]	[Tf2N]	313.2	78.45	0.7128		[EMIM][BETI]	[EMIM]	[BETA]	363.2	198.9	0.679
[BMIM][Tf2N]	[BMIM]	[Tf2N]	333.3	77.2	0.5859		[EMIM][BETI]	[EMIM]	[BETA]	363.2	291.5	0.733
[BMIM][Tf2N]	[BMIM]	[Tf2N]	313.3	76.73	0.6823		[HMIM][BETI]	[HMIM]	[BETA]	363.2	16	0.226
[BMIM][Tf2N]	[BMIM]	[Tf2N]	313.3	71.29	0.663		[HMIM][BETI]	[HMIM]	[BETA]	363.2	27.5	0.321
[BMIM][Tf2N]	[BMIM]	[Tf2N]	333.3	70.81	0.5723		[HMIM][BETI]	[HMIM]	[BETA]	363.2	42.9	0.419
[BMIM][Tf2N]	[BMIM]	[Tf2N]	333.3	66.8	0.5425		[HMIM][BETI]	[HMIM]	[BETA]	363.2	58	0.493
[BMIM][Tf2N]	[BMIM]	[Tf2N]	313.3	64.8	0.6473		[HMIM][BETI]	[HMIM]	[BETA]	363.2	65.8	0.522
[BMIM][Tf2N]	[BMIM]	[Tf2N]	313.2	63.59	0.6335		[HMIM][BETI]	[HMIM]	[BETA]	363.2	89.1	0.601
[BMIM][Tf2N]	[BMIM]	[Tf2N]	333.3	63.18	0.534		[HMIM][BETI]	[HMIM]	[BETA]	363.2	107	0.647
[BMIM][Tf2N]	[BMIM]	[Tf2N]	298.2	60.35	0.7168		[HMIM][BETI]	[HMIM]	[BETA]	363.2	127	0.689
[BMIM][Tf2N]	[BMIM]	[Tf2N]	298.1	59.2	0.7188		[HMIM][BETI]	[HMIM]	[BETA]	363.2	176	0.749
[BMIM][Tf2N]	[BMIM]	[Tf2N]	298.2	58.76	0.706		[EMIM][MeSO3]	[EMIM]	[MeSO3]	373.15	4.23	0.0209
[BMIM][Tf2N]	[BMIM]	[Tf2N]	333.3	56.01	0.5066		[EMIM][MeSO3]	[EMIM]	[MeSO3]	373.15	12.44	0.059
[BMIM][Tf2N]	[BMIM]	[Tf2N]	313.3	52.73	0.5773		[EMIM][MeSO3]	[EMIM]	[MeSO3]	373.15	26.12	0.1164
[BMIM][Tf2N]	[BMIM]	[Tf2N]	333.3	52.62	0.4876		[EMIM][MeSO3]	[EMIM]	[MeSO3]	373.15	49.57	0.1791
[BMIM][Tf2N]	[BMIM]	[Tf2N]	333.3	49.5	0.4752		[BVIM][Tf2N]	[BVIM]	[Tf2N]	373.2	12.8	0.125
[BMIM][Tf2N]	[BMIM]	[Tf2N]	313.3	48.21	0.5539		[BVIM][Tf2N]	[BVIM]	[Tf2N]	373.2	34.2	0.286
[BMIM][Tf2N]	[BMIM]	[Tf2N]	313.2	47.45	0.543		[BVIM][Tf2N]	[BVIM]	[Tf2N]	373.2	47.1	0.354
[BMIM][Tf2N]	[BMIM]	[Tf2N]	298.2	46.94	0.6491		[BVIM][Tf2N]	[BVIM]	[Tf2N]	373.2	59.7	0.418
[BMIM][Tf2N]	[BMIM]	[Tf2N]	298.2	46.67	0.6356		[BVIM][Tf2N]	[BVIM]	[Tf2N]	373.2	85.9	0.495
[BMIM][Tf2N]	[BMIM]	[Tf2N]	298.2	44.27	0.6181		[BVIM][Tf2N]	[BVIM]	[Tf2N]	373.2	115.1	0.562
[BMIM][Tf2N]	[BMIM]	[Tf2N]	298.2	42.72	0.6198		[BVIM][Tf2N]	[BVIM]	[Tf2N]	373.2	161	0.64
[BMIM][Tf2N]	[BMIM]	[Tf2N]	313.3	40.19	0.5194		[BVIM][Tf2N]	[BVIM]	[Tf2N]	373.2	294.8	0.73
[BMIM][Tf2N]	[BMIM]	[Tf2N]	333.3	39.67	0.4218		[EMIM][BETI]	[EMIM]	[BETA]	373.2	9.2	0.124
[BMIM][Tf2N]	[BMIM]	[Tf2N]	333.3	38.84	0.4105		[EMIM][BETI]	[EMIM]	[BETA]	373.2	22.9	0.235
[BMIM][Tf2N]	[BMIM]	[Tf2N]	333.3	34.23	0.4128		[EMIM][BETI]	[EMIM]	[BETA]	373.2	41.6	0.338
[BMIM][Tf2N]	[BMIM]	[Tf2N]	298.2	33.96	0.534		[EMIM][BETI]	[EMIM]	[BETA]	373.2	56.4	0.401
[BMIM][Tf2N]	[BMIM]	[Tf2N]	298.2	33.59	0.5307		[EMIM][BETI]	[EMIM]	[BETA]	373.2	92.4	0.505
[BMIM][Tf2N]	[BMIM]	[Tf2N]	313.3	32.76	0.4384		[EMIM][BETI]	[EMIM]	[BETA]	373.2	124	0.571
[BMIM][Tf2N]	[BMIM]	[Tf2N]	313.2	32.48	0.4274		[EMIM][BETI]	[EMIM]	[BETA]	373.2	221.3	0.679
[BMIM][Tf2N]	[BMIM]	[Tf2N]	298.2	31.69	0.5245		[EMIM][BETI]	[EMIM]	[BETA]	373.2	336	0.733
[BMIM][Tf2N]	[BMIM]	[Tf2N]	298.2	29.5	0.5138		[HMIM][BETI]	[HMIM]	[BETA]	373.2	18.1	0.226
[BMIM][Tf2N]	[BMIM]	[Tf2N]	333.3	25.08	0.3109		[HMIM][BETI]	[HMIM]	[BETA]	373.2	31	0.321
[BMIM][Tf2N]	[BMIM]	[Tf2N]	313.3	24.29	0.3728		[HMIM][BETI]	[HMIM]	[BETA]	373.2	48.2	0.419
[BMIM][Tf2N]	[BMIM]	[Tf2N]	298.2	22.28	0.4034		[HMIM][BETI]	[HMIM]	[BETA]	373.2	65.2	0.493
[BMIM][Tf2N]	[BMIM]	[Tf2N]	298.2	22.24	0.4218		[HMIM][BETI]	[HMIM]	[BETA]	373.2	73.4	0.522
[BMIM][Tf2N]	[BMIM]	[Tf2N]	298.2	20.84	0.4114		[HMIM][BETI]	[HMIM]	[BETA]	373.2	99.8	0.601
[BMIM][Tf2N]	[BMIM]	[Tf2N]	333.3	20.48	0.2579		[HMIM][BETI]	[HMIM]	[BETA]	373.2	120	0.647
[BMIM][Tf2N]	[BMIM]	[Tf2N]	298.2	18.68	0.3624		[HMIM][BETI]	[HMIM]	[BETA]	373.2	141	0.689
[BMIM][Tf2N]	[BMIM]	[Tf2N]	333.3	18.12	0.2498		[HMIM][BETI]	[HMIM]	[BETA]	373.2	197	0.749
[BMIM][Tf2N]	[BMIM]	[Tf2N]	313.3	17.21	0.2687		[EMIM][MeSO3]	[EMIM]	[MeSO3]	393.15	4.28	0.018
[BMIM][Tf2N]	[BMIM]	[Tf2N]	313.2	16.1	0.2383		[EMIM][MeSO3]	[EMIM]	[MeSO3]	393.15	12.57	0.0525
[BMIM][Tf2N]	[BMIM]	[Tf2N]	313.3	13.89	0.2586		[EMIM][MeSO3]	[EMIM]	[MeSO3]	393.15	26.36	0.1059
[BMIM][Tf2N]	[BMIM]	[Tf2N]	333.3	13.64	0.1759		[EMIM][MeSO3]	[EMIM]	[MeSO3]	393.15	49.88	0.1679
[BMIM][Tf2N]	[BMIM]	[Tf2N]	298.2	11.65	0.2525		[EMIM][MeSO3]	[EMIM]	[MeSO3]	413.15	4.32	0.016
[BMIM][Tf2N]	[BMIM]	[Tf2N]	298.2	11.63	0.2715		[EMIM][MeSO3]	[EMIM]	[MeSO3]	413.15	12.69	0.0462
[BMIM][Tf2N]	[BMIM]	[Tf2N]	298.2	11.38	0.2682		[EMIM][MeSO3]	[EMIM]	[MeSO3]	413.15	26.56	0.0982
[HMIM][Tf2N]	[HMIM]	[Tf2N]	313.3	115.58	0.7586		[EMIM][MeSO3]	[EMIM]	[MeSO3]	413.15	50.14	0.158
[HMIM][Tf2N]	[HMIM]	[Tf2N]	333.3	111.45	0.7192
[HMIM][Tf2N]	[HMIM]	[Tf2N]	313.3	97.92	0.7478
[HMIM][Tf2N]	[HMIM]	[Tf2N]	333.3	97.44	0.6932
[HMIM][Tf2N]	[HMIM]	[Tf2N]	313.3	83.73	0.723
[HMIM][Tf2N]	[HMIM]	[Tf2N]	333.3	83.6	0.6446
[HMIM][Tf2N]	[HMIM]	[Tf2N]	313.3	83.56	0.7321
[HMIM][Tf2N]	[HMIM]	[Tf2N]	333.3	70.39	0.5867
[HMIM][Tf2N]	[HMIM]	[Tf2N]	313.3	70.02	0.678
[HMIM][Tf2N]	[HMIM]	[Tf2N]	313.3	69.91	0.6852
[HMIM][Tf2N]	[HMIM]	[Tf2N]	298.2	60.91	0.7396
[HMIM][Tf2N]	[HMIM]	[Tf2N]	313.3	57.46	0.6253
[HMIM][Tf2N]	[HMIM]	[Tf2N]	333.3	56.21	0.5028
[HMIM][Tf2N]	[HMIM]	[Tf2N]	313.3	55.8	0.6195
[HMIM][Tf2N]	[HMIM]	[Tf2N]	298.2	51.56	0.6889
[HMIM][Tf2N]	[HMIM]	[Tf2N]	333.3	43.97	0.4329
[HMIM][Tf2N]	[HMIM]	[Tf2N]	313.3	42.53	0.5434
[HMIM][Tf2N]	[HMIM]	[Tf2N]	298.2	42.34	0.6282
[HMIM][Tf2N]	[HMIM]	[Tf2N]	313.3	41.55	0.5386
[HMIM][Tf2N]	[HMIM]	[Tf2N]	333.3	31.91	0.3613
[HMIM][Tf2N]	[HMIM]	[Tf2N]	298.1	31.88	0.5446
[HMIM][Tf2N]	[HMIM]	[Tf2N]	313.3	28.19	0.4255
[HMIM][Tf2N]	[HMIM]	[Tf2N]	313.3	28.16	0.427
[HMIM][Tf2N]	[HMIM]	[Tf2N]	298.1	21.95	0.4354
[HMIM][Tf2N]	[HMIM]	[Tf2N]	333.3	17.15	0.1993
[HMIM][Tf2N]	[HMIM]	[Tf2N]	313.3	15.37	0.298
[HMIM][Tf2N]	[HMIM]	[Tf2N]	313.2	13.71	0.2535
[HMIM][Tf2N]	[HMIM]	[Tf2N]	298.2	13.15	0.2706
[HMMIM][Tf2N]	[HMMIM]	[Tf2N]	333.3	118.04	0.7447
[HMMIM][Tf2N]	[HMMIM]	[Tf2N]	313.3	111.02	0.7105
[HMMIM][Tf2N]	[HMMIM]	[Tf2N]	333.3	104.72	0.7231
[HMMIM][Tf2N]	[HMMIM]	[Tf2N]	313.3	97.76	0.6963
[HMMIM][Tf2N]	[HMMIM]	[Tf2N]	333.3	91.67	0.6793
[HMMIM][Tf2N]	[HMMIM]	[Tf2N]	333.3	90.66	0.6869
[HMMIM][Tf2N]	[HMMIM]	[Tf2N]	313.3	87.22	0.6931
[HMMIM][Tf2N]	[HMMIM]	[Tf2N]	313.3	83.84	0.6807
[HMMIM][Tf2N]	[HMMIM]	[Tf2N]	313.3	77.14	0.6696
[HMMIM][Tf2N]	[HMMIM]	[Tf2N]	333.3	76.95	0.6215
[HMMIM][Tf2N]	[HMMIM]	[Tf2N]	333.3	71.52	0.584
[HMMIM][Tf2N]	[HMMIM]	[Tf2N]	313.3	70.35	0.6612
[HMMIM][Tf2N]	[HMMIM]	[Tf2N]	313.3	63.45	0.611
[HMMIM][Tf2N]	[HMMIM]	[Tf2N]	333.3	63.41	0.5479
[HMMIM][Tf2N]	[HMMIM]	[Tf2N]	333.3	58.22	0.5237
[HMMIM][Tf2N]	[HMMIM]	[Tf2N]	298.2	56.56	0.6845
[HMMIM][Tf2N]	[HMMIM]	[Tf2N]	313.3	55.25	0.5663
[HMMIM][Tf2N]	[HMMIM]	[Tf2N]	313.3	53.14	0.5837
[HMMIM][Tf2N]	[HMMIM]	[Tf2N]	333.3	49.22	0.473
[HMMIM][Tf2N]	[HMMIM]	[Tf2N]	298.2	43.08	0.6018
[HMMIM][Tf2N]	[HMMIM]	[Tf2N]	333.3	42.22	0.4354
[HMMIM][Tf2N]	[HMMIM]	[Tf2N]	313.3	35.76	0.463
[HMMIM][Tf2N]	[HMMIM]	[Tf2N]	333.3	34.55	0.3529
[HMMIM][Tf2N]	[HMMIM]	[Tf2N]	298.2	29.71	0.4956
[HMMIM][Tf2N]	[HMMIM]	[Tf2N]	333.3	27.81	0.3339
[HMMIM][Tf2N]	[HMMIM]	[Tf2N]	333.3	18.37	0.2102
[HMMIM][Tf2N]	[HMMIM]	[Tf2N]	313.3	18.33	0.2924
[HMMIM][Tf2N]	[HMMIM]	[Tf2N]	298.2	14.97	0.3017
[HMMIM][Tf2N]	[HMMIM]	[Tf2N]	333.3	14.79	0.1991
[OMIM][Tf2N]	[OMIM]	[Tf2N]	313.3	114.76	0.7918
[OMIM][Tf2N]	[OMIM]	[Tf2N]	333.3	114.69	0.7521
[OMIM][Tf2N]	[OMIM]	[Tf2N]	333.3	97.52	0.7178
[OMIM][Tf2N]	[OMIM]	[Tf2N]	313.3	96.87	0.7795
[OMIM][Tf2N]	[OMIM]	[Tf2N]	333.3	83.97	0.6886
[OMIM][Tf2N]	[OMIM]	[Tf2N]	313.3	83.6	0.7627
[OMIM][Tf2N]	[OMIM]	[Tf2N]	313.3	70.05	0.7099
[OMIM][Tf2N]	[OMIM]	[Tf2N]	333.3	70.04	0.6293
[OMIM][Tf2N]	[OMIM]	[Tf2N]	298.2	60.13	0.7516
[OMIM][Tf2N]	[OMIM]	[Tf2N]	313.3	56.76	0.6556
[OMIM][Tf2N]	[OMIM]	[Tf2N]	333.3	55.99	0.5746
[OMIM][Tf2N]	[OMIM]	[Tf2N]	298.2	50.96	0.7043
[OMIM][Tf2N]	[OMIM]	[Tf2N]	313.3	42.96	0.575
[OMIM][Tf2N]	[OMIM]	[Tf2N]	333.3	42.56	0.4937
[OMIM][Tf2N]	[OMIM]	[Tf2N]	298.2	41.67	0.6423
[OMIM][Tf2N]	[OMIM]	[Tf2N]	313.3	28.88	0.4508
[OMIM][Tf2N]	[OMIM]	[Tf2N]	333.3	28.59	0.3822
[OMIM][Tf2N]	[OMIM]	[Tf2N]	298.2	22.74	0.4519
[OMIM][Tf2N]	[OMIM]	[Tf2N]	333.3	16.23	0.2467
[OMIM][Tf2N]	[OMIM]	[Tf2N]	313.3	14.96	0.2775
[OMIM][Tf2N]	[OMIM]	[Tf2N]	298.2	13.26	0.3021
[BMIM][TfO]	[BMIM]	[TfO]	333.3	114.77	0.5624
[BMIM][TfO]	[BMIM]	[TfO]	333.3	97.52	0.5371
[BMIM][TfO]	[BMIM]	[TfO]	313.2	88.28	0.5833
[BMIM][TfO]	[BMIM]	[TfO]	333.3	83.94	0.4991
[BMIM][TfO]	[BMIM]	[TfO]	313.2	78.77	0.54
[BMIM][TfO]	[BMIM]	[TfO]	333.3	70.55	0.422
[BMIM][TfO]	[BMIM]	[TfO]	313.2	67.26	0.5012
[BMIM][TfO]	[BMIM]	[TfO]	298.2	63.2	0.6363
[BMIM][TfO]	[BMIM]	[TfO]	298.2	60.08	0.6087
[BMIM][TfO]	[BMIM]	[TfO]	333.3	56.49	0.3521
[BMIM][TfO]	[BMIM]	[TfO]	313.2	54.38	0.4346
[BMIM][TfO]	[BMIM]	[TfO]	298.2	52.32	0.5874
[BMIM][TfO]	[BMIM]	[TfO]	298.2	45.24	0.5337
[BMIM][TfO]	[BMIM]	[TfO]	313.3	43.78	0.3766
[BMIM][TfO]	[BMIM]	[TfO]	333.3	42.29	0.2813
[BMIM][TfO]	[BMIM]	[TfO]	298.2	41.55	0.529
[BMIM][TfO]	[BMIM]	[TfO]	298.2	32.54	0.4396
[BMIM][TfO]	[BMIM]	[TfO]	298.2	32.02	0.4523
[BMIM][TfO]	[BMIM]	[TfO]	313.3	31.82	0.309
[BMIM][TfO]	[BMIM]	[TfO]	333.3	28.71	0.2215
[BMIM][TfO]	[BMIM]	[TfO]	298.2	21.44	0.3512
[BMIM][TfO]	[BMIM]	[TfO]	313.3	20.94	0.2172
[BMIM][TfO]	[BMIM]	[TfO]	298.2	20.73	0.3434
[BMIM][TfO]	[BMIM]	[TfO]	333.3	15.14	0.1188
[BMIM][TfO]	[BMIM]	[TfO]	298.2	11.95	0.2471
[BMIM][TfO]	[BMIM]	[TfO]	298.2	10.44	0.1878
[BMIM][TfO]	[BMIM]	[TfO]	313.2	10.39	0.1088
[BMIM][BF4]	[BMIM]	[BF4]	283.15	13	0.243
[BMIM][BF4]	[BMIM]	[BF4]	283.15	13	0.243
[BMIM][BF4]	[BMIM]	[BF4]	298.15	13	0.182
[BMIM][BF4]	[BMIM]	[BF4]	298.15	13	0.182
[BMIM][BF4]	[BMIM]	[BF4]	298.15	13	0.185
[BMIM][BF4]	[BMIM]	[BF4]	298.15	13	0.185
[BMIM][BF4]	[BMIM]	[BF4]	323.15	13	0.123
[BMIM][BF4]	[BMIM]	[BF4]	323.15	13	0.123
[BMIM][BF4]	[BMIM]	[BF4]	323.15	13	0.125
[BMIM][BF4]	[BMIM]	[BF4]	323.15	13	0.125
[BMIM][BF4]	[BMIM]	[BF4]	283.15	12	0.228
[BMIM][BF4]	[BMIM]	[BF4]	298.15	12	0.17
[BMIM][BF4]	[BMIM]	[BF4]	298.15	12	0.173
[BMIM][BF4]	[BMIM]	[BF4]	323.15	12	0.116
[BMIM][BF4]	[BMIM]	[BF4]	323.15	12	0.117
[BMIM][BF4]	[BMIM]	[BF4]	283.15	11	0.213
[BMIM][BF4]	[BMIM]	[BF4]	283.15	11	0.22
[BMIM][BF4]	[BMIM]	[BF4]	298.15	11	0.158
[BMIM][BF4]	[BMIM]	[BF4]	298.15	11	0.161
[BMIM][BF4]	[BMIM]	[BF4]	298.15	11	0.164
[BMIM][BF4]	[BMIM]	[BF4]	298.15	11	0.167
[BMIM][BF4]	[BMIM]	[BF4]	323.15	11	0.105
[BMIM][BF4]	[BMIM]	[BF4]	323.15	11	0.107
[BMIM][BF4]	[BMIM]	[BF4]	323.15	11	0.108
[BMIM][BF4]	[BMIM]	[BF4]	323.15	11	0.11
[BMIM][BF4]	[BMIM]	[BF4]	283.15	10	0.196
[BMIM][BF4]	[BMIM]	[BF4]	298.15	10	0.145
[BMIM][BF4]	[BMIM]	[BF4]	298.15	10	0.149
[BMIM][BF4]	[BMIM]	[BF4]	323.15	10	0.101
[BMIM][BF4]	[BMIM]	[BF4]	323.15	9.99	0.0992
[BMIM][BF4]	[BMIM]	[BF4]	283.15	9	0.19
[BMIM][BF4]	[BMIM]	[BF4]	298.15	9	0.139
[BMIM][BF4]	[BMIM]	[BF4]	323.15	9	0.0901
[BMIM][BF4]	[BMIM]	[BF4]	283.15	8.5	0.171
[BMIM][BF4]	[BMIM]	[BF4]	298.15	8.5	0.125
[BMIM][BF4]	[BMIM]	[BF4]	298.15	8.5	0.13
[BMIM][BF4]	[BMIM]	[BF4]	323.15	8.5	0.0847
[BMIM][BF4]	[BMIM]	[BF4]	323.15	8.49	0.0867
[BMIM][BF4]	[BMIM]	[BF4]	283.15	7	0.144
[BMIM][BF4]	[BMIM]	[BF4]	298.15	7	0.104
[BMIM][BF4]	[BMIM]	[BF4]	298.15	7	0.11
[BMIM][BF4]	[BMIM]	[BF4]	323.15	7	0.0722
[BMIM][BF4]	[BMIM]	[BF4]	323.15	7	0.0738
[BMIM][BF4]	[BMIM]	[BF4]	283.15	6	0.14
[BMIM][BF4]	[BMIM]	[BF4]	323.15	6	0.0627
[BMIM][BF4]	[BMIM]	[BF4]	298.15	6	0.108
[BMIM][BF4]	[BMIM]	[BF4]	323.15	6	0.0664
[BMIM][BF4]	[BMIM]	[BF4]	283.15	5.5	0.115
[BMIM][BF4]	[BMIM]	[BF4]	298.15	5.5	0.0818
[BMIM][BF4]	[BMIM]	[BF4]	298.15	5.5	0.0877
[BMIM][BF4]	[BMIM]	[BF4]	323.15	5.5	0.0573
[BMIM][BF4]	[BMIM]	[BF4]	323.15	5.5	0.0577
[BMIM][BF4]	[BMIM]	[BF4]	283.15	5	0.117
[BMIM][BF4]	[BMIM]	[BF4]	283.15	4	0.0831
[BMIM][BF4]	[BMIM]	[BF4]	298.15	4	0.0588
[BMIM][BF4]	[BMIM]	[BF4]	298.15	4	0.0649
[BMIM][BF4]	[BMIM]	[BF4]	323.15	4	0.041
[BMIM][BF4]	[BMIM]	[BF4]	323.15	4	0.0443
[BMIM][BF4]	[BMIM]	[BF4]	298.15	2.5	0.035
[BMIM][BF4]	[BMIM]	[BF4]	283.15	2.5	0.0506
[BMIM][BF4]	[BMIM]	[BF4]	298.15	2.5	0.0405
[BMIM][BF4]	[BMIM]	[BF4]	323.15	2.5	0.0256
[BMIM][BF4]	[BMIM]	[BF4]	323.15	2.5	0.0261
[BMIM][BF4]	[BMIM]	[BF4]	298.15	0.999	0.0134
[BMIM][BF4]	[BMIM]	[BF4]	283.15	0.999	0.0197
[BMIM][BF4]	[BMIM]	[BF4]	298.15	0.999	0.0161
[BMIM][BF4]	[BMIM]	[BF4]	323.15	0.999	0.0104
[BMIM][BF4]	[BMIM]	[BF4]	323.15	0.999	0.0117
[BMIM][BF4]	[BMIM]	[BF4]	298.15	0.502	0.00567
[BMIM][BF4]	[BMIM]	[BF4]	323.15	0.5	0.00496
[BMIM][BF4]	[BMIM]	[BF4]	283.15	0.499	0.00893
[BMIM][BF4]	[BMIM]	[BF4]	298.15	0.499	0.00774
[BMIM][BF4]	[BMIM]	[BF4]	323.15	0.499	0.00587
[BMIM][BF4]	[BMIM]	[BF4]	298.15	0.1	0.000995
[BMIM][BF4]	[BMIM]	[BF4]	298.15	0.0995	0.00124
[BMIM][BF4]	[BMIM]	[BF4]	323.15	0.0993	0.00133
[BMIM][BF4]	[BMIM]	[BF4]	283.15	0.0992	0.00165
[BMIM][BF4]	[BMIM]	[BF4]	323.15	0.0991	0.000776
[BMIM][BF4]	[BMIM]	[BF4]	298.15	0.0495	0.000374
[BMIM][BF4]	[BMIM]	[BF4]	323.15	0.0493	0.000275
[BMIM][BF4]	[BMIM]	[BF4]	298.15	0.0482	0.00018
[BMIM][BF4]	[BMIM]	[BF4]	323.15	0.0481	0.000683
[BMIM][BF4]	[BMIM]	[BF4]	283.15	0.048	0.000574
[BMIM][BF4]	[BMIM]	[BF4]	298.15	0.0153	0.000472
[BMIM][BF4]	[BMIM]	[BF4]	298.15	0.0114	0.000319
[BMIM][BF4]	[BMIM]	[BF4]	323.15	0.0111	7.28e-05
[BMIM][BF4]	[BMIM]	[BF4]	323.15	0.01	0.000197
[BMIM][BF4]	[BMIM]	[BF4]	283.15	0.00991	0.000142
[BMIM][PF6]	[BMIM]	[PF6]	283.15	13	0.262
[BMIM][PF6]	[BMIM]	[PF6]	283.15	13	0.262
[BMIM][PF6]	[BMIM]	[PF6]	298.15	13	0.2
[BMIM][PF6]	[BMIM]	[PF6]	298.15	13	0.2
[BMIM][PF6]	[BMIM]	[PF6]	323.15	13	0.134
[BMIM][PF6]	[BMIM]	[PF6]	323.15	13	0.134
[BMIM][PF6]	[BMIM]	[PF6]	283.15	12.5	0.254
[BMIM][PF6]	[BMIM]	[PF6]	283.15	12.5	0.254
[BMIM][PF6]	[BMIM]	[PF6]	298.15	12.5	0.193
[BMIM][PF6]	[BMIM]	[PF6]	298.15	12.5	0.194
[BMIM][PF6]	[BMIM]	[PF6]	323.15	12.5	0.129
[BMIM][PF6]	[BMIM]	[PF6]	323.15	12.5	0.13
[BMIM][PF6]	[BMIM]	[PF6]	283.15	12	0.246
[BMIM][PF6]	[BMIM]	[PF6]	283.15	12	0.246
[BMIM][PF6]	[BMIM]	[PF6]	298.15	12	0.186
[BMIM][PF6]	[BMIM]	[PF6]	298.15	12	0.187
[BMIM][PF6]	[BMIM]	[PF6]	323.15	12	0.125
[BMIM][PF6]	[BMIM]	[PF6]	323.15	12	0.126
[BMIM][PF6]	[BMIM]	[PF6]	283.15	11.5	0.238
[BMIM][PF6]	[BMIM]	[PF6]	283.15	11.5	0.238
[BMIM][PF6]	[BMIM]	[PF6]	298.15	11.5	0.181
[BMIM][PF6]	[BMIM]	[PF6]	298.15	11.5	0.181
[BMIM][PF6]	[BMIM]	[PF6]	323.15	11.5	0.121
[BMIM][PF6]	[BMIM]	[PF6]	323.15	11.5	0.121
[BMIM][PF6]	[BMIM]	[PF6]	283.15	11	0.23
[BMIM][PF6]	[BMIM]	[PF6]	283.15	11	0.23
[BMIM][PF6]	[BMIM]	[PF6]	298.15	11	0.174
[BMIM][PF6]	[BMIM]	[PF6]	298.15	11	0.175
[BMIM][PF6]	[BMIM]	[PF6]	323.15	11	0.117
[BMIM][PF6]	[BMIM]	[PF6]	323.15	11	0.117
[BMIM][PF6]	[BMIM]	[PF6]	283.15	10.5	0.221
[BMIM][PF6]	[BMIM]	[PF6]	283.15	10.5	0.222
[BMIM][PF6]	[BMIM]	[PF6]	298.15	10.5	0.167
[BMIM][PF6]	[BMIM]	[PF6]	298.15	10.5	0.168
[BMIM][PF6]	[BMIM]	[PF6]	323.15	10.5	0.112
[BMIM][PF6]	[BMIM]	[PF6]	323.15	10.5	0.113
[BMIM][PF6]	[BMIM]	[PF6]	283.15	10	0.213
[BMIM][PF6]	[BMIM]	[PF6]	283.15	10	0.214
[BMIM][PF6]	[BMIM]	[PF6]	298.15	10	0.16
[BMIM][PF6]	[BMIM]	[PF6]	298.15	10	0.161
[BMIM][PF6]	[BMIM]	[PF6]	323.15	10	0.108
[BMIM][PF6]	[BMIM]	[PF6]	323.15	9.99	0.108
[BMIM][PF6]	[BMIM]	[PF6]	283.15	9.5	0.205
[BMIM][PF6]	[BMIM]	[PF6]	298.15	9.5	0.154
[BMIM][PF6]	[BMIM]	[PF6]	298.15	9.5	0.154
[BMIM][PF6]	[BMIM]	[PF6]	323.15	9.5	0.103
[BMIM][PF6]	[BMIM]	[PF6]	323.15	9.5	0.104
[BMIM][PF6]	[BMIM]	[PF6]	283.15	9.49	0.205
[BMIM][PF6]	[BMIM]	[PF6]	283.15	9	0.196
[BMIM][PF6]	[BMIM]	[PF6]	283.15	9	0.196
[BMIM][PF6]	[BMIM]	[PF6]	298.15	9	0.147
[BMIM][PF6]	[BMIM]	[PF6]	298.15	9	0.147
[BMIM][PF6]	[BMIM]	[PF6]	323.15	9	0.0983
[BMIM][PF6]	[BMIM]	[PF6]	323.15	9	0.0988
[BMIM][PF6]	[BMIM]	[PF6]	283.15	8.5	0.187
[BMIM][PF6]	[BMIM]	[PF6]	298.15	8.5	0.14
[BMIM][PF6]	[BMIM]	[PF6]	298.15	8.5	0.141
[BMIM][PF6]	[BMIM]	[PF6]	323.15	8.5	0.0934
[BMIM][PF6]	[BMIM]	[PF6]	323.15	8.5	0.0942
[BMIM][PF6]	[BMIM]	[PF6]	283.15	8.49	0.186
[BMIM][PF6]	[BMIM]	[PF6]	283.15	8	0.178
[BMIM][PF6]	[BMIM]	[PF6]	298.15	8	0.133
[BMIM][PF6]	[BMIM]	[PF6]	323.15	8	0.0886
[BMIM][PF6]	[BMIM]	[PF6]	323.15	8	0.0895
[BMIM][PF6]	[BMIM]	[PF6]	283.15	7.99	0.177
[BMIM][PF6]	[BMIM]	[PF6]	298.15	7.99	0.134
[BMIM][PF6]	[BMIM]	[PF6]	298.15	7.51	0.125
[BMIM][PF6]	[BMIM]	[PF6]	323.15	7.51	0.0833
[BMIM][PF6]	[BMIM]	[PF6]	283.15	7.5	0.168
[BMIM][PF6]	[BMIM]	[PF6]	283.15	7.5	0.168
[BMIM][PF6]	[BMIM]	[PF6]	298.15	7.5	0.126
[BMIM][PF6]	[BMIM]	[PF6]	323.15	7.5	0.0845
[BMIM][PF6]	[BMIM]	[PF6]	298.15	7.01	0.118
[BMIM][PF6]	[BMIM]	[PF6]	323.15	7.01	0.0787
[BMIM][PF6]	[BMIM]	[PF6]	283.15	7	0.158
[BMIM][PF6]	[BMIM]	[PF6]	283.15	7	0.159
[BMIM][PF6]	[BMIM]	[PF6]	298.15	7	0.119
[BMIM][PF6]	[BMIM]	[PF6]	323.15	6.99	0.0798
[BMIM][PF6]	[BMIM]	[PF6]	298.15	6.51	0.11
[BMIM][PF6]	[BMIM]	[PF6]	323.15	6.51	0.0737
[BMIM][PF6]	[BMIM]	[PF6]	283.15	6.5	0.148
[BMIM][PF6]	[BMIM]	[PF6]	283.15	6.5	0.149
[BMIM][PF6]	[BMIM]	[PF6]	298.15	6.5	0.11
[BMIM][PF6]	[BMIM]	[PF6]	323.15	6.5	0.0747
[BMIM][PF6]	[BMIM]	[PF6]	298.15	6.01	0.103
[BMIM][PF6]	[BMIM]	[PF6]	323.15	6.01	0.0685
[BMIM][PF6]	[BMIM]	[PF6]	283.15	6	0.139
[BMIM][PF6]	[BMIM]	[PF6]	283.15	6	0.139
[BMIM][PF6]	[BMIM]	[PF6]	298.15	6	0.103
[BMIM][PF6]	[BMIM]	[PF6]	323.15	6	0.0689
[BMIM][PF6]	[BMIM]	[PF6]	298.15	5.51	0.0951
[BMIM][PF6]	[BMIM]	[PF6]	323.15	5.51	0.0626
[BMIM][PF6]	[BMIM]	[PF6]	283.15	5.5	0.128
[BMIM][PF6]	[BMIM]	[PF6]	283.15	5.5	0.129
[BMIM][PF6]	[BMIM]	[PF6]	298.15	5.5	0.0958
[BMIM][PF6]	[BMIM]	[PF6]	323.15	5.5	0.0643
[BMIM][PF6]	[BMIM]	[PF6]	298.15	5.01	0.0874
[BMIM][PF6]	[BMIM]	[PF6]	323.15	5.01	0.0577
[BMIM][PF6]	[BMIM]	[PF6]	283.15	5	0.118
[BMIM][PF6]	[BMIM]	[PF6]	298.15	5	0.0878
[BMIM][PF6]	[BMIM]	[PF6]	323.15	5	0.0583
[BMIM][PF6]	[BMIM]	[PF6]	283.15	4.99	0.118
[BMIM][PF6]	[BMIM]	[PF6]	298.15	4.51	0.0794
[BMIM][PF6]	[BMIM]	[PF6]	323.15	4.51	0.0522
[BMIM][PF6]	[BMIM]	[PF6]	283.15	4.5	0.107
[BMIM][PF6]	[BMIM]	[PF6]	283.15	4.5	0.108
[BMIM][PF6]	[BMIM]	[PF6]	298.15	4.5	0.0794
[BMIM][PF6]	[BMIM]	[PF6]	323.15	4.5	0.0528
[BMIM][PF6]	[BMIM]	[PF6]	298.15	4.01	0.0711
[BMIM][PF6]	[BMIM]	[PF6]	323.15	4.01	0.0456
[BMIM][PF6]	[BMIM]	[PF6]	283.15	4	0.0962
[BMIM][PF6]	[BMIM]	[PF6]	283.15	4	0.0971
[BMIM][PF6]	[BMIM]	[PF6]	298.15	4	0.0703
[BMIM][PF6]	[BMIM]	[PF6]	323.15	4	0.0468
[BMIM][PF6]	[BMIM]	[PF6]	298.15	3.51	0.0628
[BMIM][PF6]	[BMIM]	[PF6]	323.15	3.51	0.0401
[BMIM][PF6]	[BMIM]	[PF6]	283.15	3.5	0.0851
[BMIM][PF6]	[BMIM]	[PF6]	283.15	3.5	0.086
[BMIM][PF6]	[BMIM]	[PF6]	298.15	3.5	0.0619
[BMIM][PF6]	[BMIM]	[PF6]	323.15	3.5	0.0412
[BMIM][PF6]	[BMIM]	[PF6]	298.15	3.01	0.0545
[BMIM][PF6]	[BMIM]	[PF6]	323.15	3.01	0.034
[BMIM][PF6]	[BMIM]	[PF6]	283.15	3	0.0737
[BMIM][PF6]	[BMIM]	[PF6]	283.15	3	0.0747
[BMIM][PF6]	[BMIM]	[PF6]	298.15	3	0.0534
[BMIM][PF6]	[BMIM]	[PF6]	323.15	3	0.0352
[BMIM][PF6]	[BMIM]	[PF6]	298.15	2.51	0.0458
[BMIM][PF6]	[BMIM]	[PF6]	323.15	2.51	0.0293
[BMIM][PF6]	[BMIM]	[PF6]	283.15	2.5	0.0618
[BMIM][PF6]	[BMIM]	[PF6]	283.15	2.5	0.0631
[BMIM][PF6]	[BMIM]	[PF6]	298.15	2.5	0.0446
[BMIM][PF6]	[BMIM]	[PF6]	323.15	2.5	0.0299
[BMIM][PF6]	[BMIM]	[PF6]	298.15	2.01	0.0369
[BMIM][PF6]	[BMIM]	[PF6]	323.15	2.01	0.0241
[BMIM][PF6]	[BMIM]	[PF6]	283.15	2	0.0496
[BMIM][PF6]	[BMIM]	[PF6]	298.15	2	0.0355
[BMIM][PF6]	[BMIM]	[PF6]	283.15	2	0.0512
[BMIM][PF6]	[BMIM]	[PF6]	323.15	2	0.0222
[BMIM][PF6]	[BMIM]	[PF6]	298.15	1.51	0.028
[BMIM][PF6]	[BMIM]	[PF6]	323.15	1.51	0.0175
[BMIM][PF6]	[BMIM]	[PF6]	283.15	1.5	0.0371
[BMIM][PF6]	[BMIM]	[PF6]	298.15	1.5	0.0265
[BMIM][PF6]	[BMIM]	[PF6]	283.15	1.5	0.0393
[BMIM][PF6]	[BMIM]	[PF6]	323.15	1.5	0.0173
[BMIM][PF6]	[BMIM]	[PF6]	298.15	1.01	0.0189
[BMIM][PF6]	[BMIM]	[PF6]	298.15	1	0.0168
[BMIM][PF6]	[BMIM]	[PF6]	323.15	1	0.0101
[BMIM][PF6]	[BMIM]	[PF6]	283.15	1	0.0244
[BMIM][PF6]	[BMIM]	[PF6]	323.15	1	0.0112
[BMIM][PF6]	[BMIM]	[PF6]	283.15	0.999	0.0267
[BMIM][PF6]	[BMIM]	[PF6]	323.15	0.505	0.00545
[BMIM][PF6]	[BMIM]	[PF6]	298.15	0.505	0.00982
[BMIM][PF6]	[BMIM]	[PF6]	298.15	0.503	0.00756
[BMIM][PF6]	[BMIM]	[PF6]	323.15	0.499	0.00409
[BMIM][PF6]	[BMIM]	[PF6]	283.15	0.499	0.0116
[BMIM][PF6]	[BMIM]	[PF6]	283.15	0.499	0.0139
[BMIM][PF6]	[BMIM]	[PF6]	323.15	0.0378	0.00036
[BMIM][PF6]	[BMIM]	[PF6]	298.15	0.0333	0.000701
[BMIM][PF6]	[BMIM]	[PF6]	283.15	0.0317	0.00179
[BMIM][Tf2N]	[BMIM]	[Tf2N]	283.15	13	0.366
[BMIM][Tf2N]	[BMIM]	[Tf2N]	283.15	13	0.366
[BMIM][Tf2N]	[BMIM]	[Tf2N]	283.15	13	0.372
[BMIM][Tf2N]	[BMIM]	[Tf2N]	283.15	13	0.372
[BMIM][Tf2N]	[BMIM]	[Tf2N]	298.15	13	0.292
[BMIM][Tf2N]	[BMIM]	[Tf2N]	298.15	13	0.292
[BMIM][Tf2N]	[BMIM]	[Tf2N]	298.15	13	0.296
[BMIM][Tf2N]	[BMIM]	[Tf2N]	298.15	13	0.296
[BMIM][Tf2N]	[BMIM]	[Tf2N]	323.15	13	0.208
[BMIM][Tf2N]	[BMIM]	[Tf2N]	323.15	13	0.208
[BMIM][Tf2N]	[BMIM]	[Tf2N]	283.15	12	0.347
[BMIM][Tf2N]	[BMIM]	[Tf2N]	283.15	12	0.352
[BMIM][Tf2N]	[BMIM]	[Tf2N]	298.15	12	0.276
[BMIM][Tf2N]	[BMIM]	[Tf2N]	298.15	12	0.279
[BMIM][Tf2N]	[BMIM]	[Tf2N]	323.15	12	0.196
[BMIM][Tf2N]	[BMIM]	[Tf2N]	283.15	11	0.327
[BMIM][Tf2N]	[BMIM]	[Tf2N]	283.15	11	0.327
[BMIM][Tf2N]	[BMIM]	[Tf2N]	283.15	11	0.331
[BMIM][Tf2N]	[BMIM]	[Tf2N]	283.15	11	0.332
[BMIM][Tf2N]	[BMIM]	[Tf2N]	298.15	11	0.259
[BMIM][Tf2N]	[BMIM]	[Tf2N]	298.15	11	0.26
[BMIM][Tf2N]	[BMIM]	[Tf2N]	298.15	11	0.262
[BMIM][Tf2N]	[BMIM]	[Tf2N]	298.15	11	0.262
[BMIM][Tf2N]	[BMIM]	[Tf2N]	323.15	11	0.183
[BMIM][Tf2N]	[BMIM]	[Tf2N]	323.15	11	0.183
[BMIM][Tf2N]	[BMIM]	[Tf2N]	283.15	10	0.305
[BMIM][Tf2N]	[BMIM]	[Tf2N]	283.15	10	0.309
[BMIM][Tf2N]	[BMIM]	[Tf2N]	298.15	10	0.242
[BMIM][Tf2N]	[BMIM]	[Tf2N]	298.15	10	0.244
[BMIM][Tf2N]	[BMIM]	[Tf2N]	323.15	10	0.169
[BMIM][Tf2N]	[BMIM]	[Tf2N]	283.15	8.5	0.27
[BMIM][Tf2N]	[BMIM]	[Tf2N]	283.15	8.5	0.274
[BMIM][Tf2N]	[BMIM]	[Tf2N]	298.15	8.5	0.214
[BMIM][Tf2N]	[BMIM]	[Tf2N]	298.15	8.5	0.214
[BMIM][Tf2N]	[BMIM]	[Tf2N]	323.15	8.5	0.149
[BMIM][Tf2N]	[BMIM]	[Tf2N]	283.15	7	0.232
[BMIM][Tf2N]	[BMIM]	[Tf2N]	283.15	7	0.235
[BMIM][Tf2N]	[BMIM]	[Tf2N]	298.15	7	0.182
[BMIM][Tf2N]	[BMIM]	[Tf2N]	298.15	7	0.183
[BMIM][Tf2N]	[BMIM]	[Tf2N]	323.15	7	0.128
[BMIM][Tf2N]	[BMIM]	[Tf2N]	283.15	6	0.208
[BMIM][Tf2N]	[BMIM]	[Tf2N]	283.15	6	0.21
[BMIM][Tf2N]	[BMIM]	[Tf2N]	298.15	6	0.159
[BMIM][Tf2N]	[BMIM]	[Tf2N]	298.15	6	0.161
[BMIM][Tf2N]	[BMIM]	[Tf2N]	323.15	6	0.11
[BMIM][Tf2N]	[BMIM]	[Tf2N]	283.15	5.51	0.189
[BMIM][Tf2N]	[BMIM]	[Tf2N]	283.15	5.5	0.193
[BMIM][Tf2N]	[BMIM]	[Tf2N]	298.15	5.5	0.149
[BMIM][Tf2N]	[BMIM]	[Tf2N]	298.15	5.5	0.149
[BMIM][Tf2N]	[BMIM]	[Tf2N]	323.15	5.5	0.104
[BMIM][Tf2N]	[BMIM]	[Tf2N]	283.15	4	0.142
[BMIM][Tf2N]	[BMIM]	[Tf2N]	283.15	4	0.146
[BMIM][Tf2N]	[BMIM]	[Tf2N]	298.15	4	0.111
[BMIM][Tf2N]	[BMIM]	[Tf2N]	298.15	4	0.113
[BMIM][Tf2N]	[BMIM]	[Tf2N]	323.15	4	0.0781
[BMIM][Tf2N]	[BMIM]	[Tf2N]	283.15	2.5	0.0901
[BMIM][Tf2N]	[BMIM]	[Tf2N]	283.15	2.5	0.0941
[BMIM][Tf2N]	[BMIM]	[Tf2N]	298.15	2.5	0.072
[BMIM][Tf2N]	[BMIM]	[Tf2N]	298.15	2.5	0.0734
[BMIM][Tf2N]	[BMIM]	[Tf2N]	323.15	2.5	0.0483
[BMIM][Tf2N]	[BMIM]	[Tf2N]	283.15	2	0.0818
[BMIM][Tf2N]	[BMIM]	[Tf2N]	283.15	2	0.0823
[BMIM][Tf2N]	[BMIM]	[Tf2N]	298.15	2	0.0601
[BMIM][Tf2N]	[BMIM]	[Tf2N]	298.15	2	0.0602
[BMIM][Tf2N]	[BMIM]	[Tf2N]	323.15	2	0.0378
[BMIM][Tf2N]	[BMIM]	[Tf2N]	283.15	1	0.0373
[BMIM][Tf2N]	[BMIM]	[Tf2N]	283.15	1	0.0397
[BMIM][Tf2N]	[BMIM]	[Tf2N]	298.15	0.999	0.0299
[BMIM][Tf2N]	[BMIM]	[Tf2N]	298.15	0.999	0.0308
[BMIM][Tf2N]	[BMIM]	[Tf2N]	323.15	0.999	0.0204
[BMIM][Tf2N]	[BMIM]	[Tf2N]	298.15	0.5	0.0149
[BMIM][Tf2N]	[BMIM]	[Tf2N]	283.15	0.499	0.0179
[BMIM][Tf2N]	[BMIM]	[Tf2N]	283.15	0.499	0.0196
[BMIM][Tf2N]	[BMIM]	[Tf2N]	323.15	0.499	0.0101
[BMIM][Tf2N]	[BMIM]	[Tf2N]	298.15	0.498	0.0155
[BMIM][Tf2N]	[BMIM]	[Tf2N]	298.15	0.199	0.00809
[BMIM][Tf2N]	[BMIM]	[Tf2N]	283.15	0.199	0.0135
[BMIM][Tf2N]	[BMIM]	[Tf2N]	323.15	0.198	0.00182
[BMIM][Tf2N]	[BMIM]	[Tf2N]	298.15	0.198	0.00637
[BMIM][Tf2N]	[BMIM]	[Tf2N]	283.15	0.198	0.0113
[BMIM][Tf2N]	[BMIM]	[Tf2N]	298.15	0.102	0.00319
[BMIM][Tf2N]	[BMIM]	[Tf2N]	283.15	0.0991	0.00348
[BMIM][Tf2N]	[BMIM]	[Tf2N]	298.15	0.0991	0.00288
[BMIM][Tf2N]	[BMIM]	[Tf2N]	323.15	0.0987	0.00172
[BMIM][Tf2N]	[BMIM]	[Tf2N]	283.15	0.0981	0.00435
[BMIM][Tf2N]	[BMIM]	[Tf2N]	298.15	0.075	0.00181
[BMIM][Tf2N]	[BMIM]	[Tf2N]	283.15	0.0734	0.00378
[BMIM][Tf2N]	[BMIM]	[Tf2N]	323.15	0.0731	0.00111
[BMIM][Tf2N]	[BMIM]	[Tf2N]	283.15	0.073	0.00281
[BMIM][Tf2N]	[BMIM]	[Tf2N]	298.15	0.073	0.00281
[BMIM][Tf2N]	[BMIM]	[Tf2N]	298.15	0.05	0.00139
[BMIM][Tf2N]	[BMIM]	[Tf2N]	323.15	0.0482	0.000558
[BMIM][Tf2N]	[BMIM]	[Tf2N]	298.15	0.0478	0.0012
[BMIM][Tf2N]	[BMIM]	[Tf2N]	283.15	0.0476	0.00208
[BMIM][Tf2N]	[BMIM]	[Tf2N]	283.15	0.0466	0.00146
[BMIM][Tf2N]	[BMIM]	[Tf2N]	323.15	0.0241	6.93e-05
[BMIM][Tf2N]	[BMIM]	[Tf2N]	298.15	0.0235	0.00168
[BMIM][Tf2N]	[BMIM]	[Tf2N]	298.15	0.0225	0.000341
[BMIM][Tf2N]	[BMIM]	[Tf2N]	323.15	0.0213	0.0019
[BMIM][Tf2N]	[BMIM]	[Tf2N]	283.15	0.0208	0.000149
[BMIM][Tf2N]	[BMIM]	[Tf2N]	298.15	0.0127	0.000105
[BMIM][Tf2N]	[BMIM]	[Tf2N]	283.15	0.0102	0.000358
[BMPYR][Tf2N]	[BMPYR]	[Tf2N]	283.15	13	0.337
[BMPYR][Tf2N]	[BMPYR]	[Tf2N]	283.15	13	0.337
[BMPYR][Tf2N]	[BMPYR]	[Tf2N]	298.15	13	0.267
[BMPYR][Tf2N]	[BMPYR]	[Tf2N]	298.15	13	0.267
[BMPYR][Tf2N]	[BMPYR]	[Tf2N]	323.15	13	0.193
[BMPYR][Tf2N]	[BMPYR]	[Tf2N]	323.15	13	0.193
[BMPYR][Tf2N]	[BMPYR]	[Tf2N]	283.15	12	0.324
[BMPYR][Tf2N]	[BMPYR]	[Tf2N]	298.15	12	0.252
[BMPYR][Tf2N]	[BMPYR]	[Tf2N]	323.15	12	0.179
[BMPYR][Tf2N]	[BMPYR]	[Tf2N]	283.15	11	0.296
[BMPYR][Tf2N]	[BMPYR]	[Tf2N]	283.15	11	0.307
[BMPYR][Tf2N]	[BMPYR]	[Tf2N]	298.15	11	0.235
[BMPYR][Tf2N]	[BMPYR]	[Tf2N]	298.15	11	0.239
[BMPYR][Tf2N]	[BMPYR]	[Tf2N]	323.15	11	0.167
[BMPYR][Tf2N]	[BMPYR]	[Tf2N]	323.15	11	0.168
[BMPYR][Tf2N]	[BMPYR]	[Tf2N]	283.15	10	0.273
[BMPYR][Tf2N]	[BMPYR]	[Tf2N]	298.15	10	0.217
[BMPYR][Tf2N]	[BMPYR]	[Tf2N]	323.15	10	0.155
[BMPYR][Tf2N]	[BMPYR]	[Tf2N]	283.15	8.5	0.238
[BMPYR][Tf2N]	[BMPYR]	[Tf2N]	298.15	8.5	0.189
[BMPYR][Tf2N]	[BMPYR]	[Tf2N]	323.15	8.5	0.134
[BMPYR][Tf2N]	[BMPYR]	[Tf2N]	283.15	7	0.2
[BMPYR][Tf2N]	[BMPYR]	[Tf2N]	298.15	7	0.159
[BMPYR][Tf2N]	[BMPYR]	[Tf2N]	323.15	7	0.113
[BMPYR][Tf2N]	[BMPYR]	[Tf2N]	283.15	6	0.198
[BMPYR][Tf2N]	[BMPYR]	[Tf2N]	298.15	6	0.148
[BMPYR][Tf2N]	[BMPYR]	[Tf2N]	323.15	6	0.1
[BMPYR][Tf2N]	[BMPYR]	[Tf2N]	283.15	5.5	0.158
[BMPYR][Tf2N]	[BMPYR]	[Tf2N]	298.15	5.5	0.128
[BMPYR][Tf2N]	[BMPYR]	[Tf2N]	323.15	5.5	0.0908
[BMPYR][Tf2N]	[BMPYR]	[Tf2N]	283.15	4	0.114
[BMPYR][Tf2N]	[BMPYR]	[Tf2N]	298.15	4	0.0935
[BMPYR][Tf2N]	[BMPYR]	[Tf2N]	323.15	4	0.0673
[BMPYR][Tf2N]	[BMPYR]	[Tf2N]	283.15	2.5	0.0673
[BMPYR][Tf2N]	[BMPYR]	[Tf2N]	298.15	2.5	0.0576
[BMPYR][Tf2N]	[BMPYR]	[Tf2N]	323.15	2.5	0.041
[BMPYR][Tf2N]	[BMPYR]	[Tf2N]	298.15	2	0.0585
[BMPYR][Tf2N]	[BMPYR]	[Tf2N]	323.15	2	0.0362
[BMPYR][Tf2N]	[BMPYR]	[Tf2N]	283.15	2	0.0874
[BMPYR][Tf2N]	[BMPYR]	[Tf2N]	283.15	1	0.0267
[BMPYR][Tf2N]	[BMPYR]	[Tf2N]	298.15	0.999	0.0233
[BMPYR][Tf2N]	[BMPYR]	[Tf2N]	323.15	0.999	0.0168
[BMPYR][Tf2N]	[BMPYR]	[Tf2N]	323.15	0.5	0.00777
[BMPYR][Tf2N]	[BMPYR]	[Tf2N]	283.15	0.499	0.0118
[BMPYR][Tf2N]	[BMPYR]	[Tf2N]	298.15	0.499	0.0108
[BMPYR][Tf2N]	[BMPYR]	[Tf2N]	323.15	0.199	0.00343
[BMPYR][Tf2N]	[BMPYR]	[Tf2N]	298.15	0.199	0.0101
[BMPYR][Tf2N]	[BMPYR]	[Tf2N]	283.15	0.198	0.0264
[BMPYR][Tf2N]	[BMPYR]	[Tf2N]	323.15	0.0992	0.000802
[BMPYR][Tf2N]	[BMPYR]	[Tf2N]	283.15	0.0989	0.00194
[BMPYR][Tf2N]	[BMPYR]	[Tf2N]	298.15	0.0989	0.00198
[BMPYR][Tf2N]	[BMPYR]	[Tf2N]	298.15	0.0731	0.00273
[BMPYR][Tf2N]	[BMPYR]	[Tf2N]	283.15	0.0731	0.0128
[BMPYR][Tf2N]	[BMPYR]	[Tf2N]	283.15	0.0518	0.000527
[BMPYR][Tf2N]	[BMPYR]	[Tf2N]	298.15	0.0481	0.000689
[BMPYR][Tf2N]	[BMPYR]	[Tf2N]	323.15	0.048	0.000111
[BMPYR][Tf2N]	[BMPYR]	[Tf2N]	323.15	0.0241	0.00011
[BMPYR][Tf2N]	[BMPYR]	[Tf2N]	283.15	0.0235	0.00708
[BMPYR][Tf2N]	[BMPYR]	[Tf2N]	283.15	0.0225	0.000107
[BMPYR][Tf2N]	[BMPYR]	[Tf2N]	323.15	0.0225	0.000868
[BMPYR][Tf2N]	[BMPYR]	[Tf2N]	298.15	0.0124	0.000161
[N1,4,4,4][Tf2N]	[N1,4,4,4]	[Tf2N]	298.15	5.5	0.114
[N1,4,4,4][Tf2N]	[N1,4,4,4]	[Tf2N]	298.15	5.5	0.114
[N1,4,4,4][Tf2N]	[N1,4,4,4]	[Tf2N]	298.15	4.99	0.105
[N1,4,4,4][Tf2N]	[N1,4,4,4]	[Tf2N]	298.15	4	0.0855
[N1,4,4,4][Tf2N]	[N1,4,4,4]	[Tf2N]	298.15	2.5	0.0547
[N1,4,4,4][Tf2N]	[N1,4,4,4]	[Tf2N]	298.15	2	0.0444
[N1,4,4,4][Tf2N]	[N1,4,4,4]	[Tf2N]	298.15	0.998	0.0227
[N1,4,4,4][Tf2N]	[N1,4,4,4]	[Tf2N]	298.15	0.498	0.0112
[N1,4,4,4][Tf2N]	[N1,4,4,4]	[Tf2N]	298.15	0.198	0.00373
[N1,4,4,4][Tf2N]	[N1,4,4,4]	[Tf2N]	298.15	0.0989	0.00212
[N1,4,4,4][Tf2N]	[N1,4,4,4]	[Tf2N]	298.15	0.0756	0.000397
[N1,4,4,4][Tf2N]	[N1,4,4,4]	[Tf2N]	298.15	0.0473	0.000883
[P1,4,4,4][TOS]	[P1,4,4,4]	[TOS]	323.15	13	0.121
[P1,4,4,4][TOS]	[P1,4,4,4]	[TOS]	323.15	13	0.121
[P1,4,4,4][TOS]	[P1,4,4,4]	[TOS]	323.15	12.5	0.116
[P1,4,4,4][TOS]	[P1,4,4,4]	[TOS]	323.15	12	0.112
[P1,4,4,4][TOS]	[P1,4,4,4]	[TOS]	323.15	11.5	0.108
[P1,4,4,4][TOS]	[P1,4,4,4]	[TOS]	323.15	11	0.105
[P1,4,4,4][TOS]	[P1,4,4,4]	[TOS]	323.15	10.5	0.101
[P1,4,4,4][TOS]	[P1,4,4,4]	[TOS]	323.15	10	0.0977
[P1,4,4,4][TOS]	[P1,4,4,4]	[TOS]	323.15	9.5	0.0926
[P1,4,4,4][TOS]	[P1,4,4,4]	[TOS]	323.15	9	0.0889
[P1,4,4,4][TOS]	[P1,4,4,4]	[TOS]	323.15	8.5	0.0832
[P1,4,4,4][TOS]	[P1,4,4,4]	[TOS]	323.15	8	0.0808
[P1,4,4,4][TOS]	[P1,4,4,4]	[TOS]	323.15	7.5	0.0748
[P1,4,4,4][TOS]	[P1,4,4,4]	[TOS]	323.15	7	0.0713
[P1,4,4,4][TOS]	[P1,4,4,4]	[TOS]	323.15	6.5	0.0655
[P1,4,4,4][TOS]	[P1,4,4,4]	[TOS]	323.15	6	0.0613
[P1,4,4,4][TOS]	[P1,4,4,4]	[TOS]	323.15	5.5	0.0559
[P1,4,4,4][TOS]	[P1,4,4,4]	[TOS]	323.15	5	0.0504
[P1,4,4,4][TOS]	[P1,4,4,4]	[TOS]	323.15	4.5	0.0467
[P1,4,4,4][TOS]	[P1,4,4,4]	[TOS]	323.15	4	0.0411
[P1,4,4,4][TOS]	[P1,4,4,4]	[TOS]	323.15	3.5	0.038
[P1,4,4,4][TOS]	[P1,4,4,4]	[TOS]	323.15	3	0.0329
[P1,4,4,4][TOS]	[P1,4,4,4]	[TOS]	323.15	2.5	0.0282
[P1,4,4,4][TOS]	[P1,4,4,4]	[TOS]	323.15	2	0.0222
[P1,4,4,4][TOS]	[P1,4,4,4]	[TOS]	323.15	1.5	0.0173
[P1,4,4,4][TOS]	[P1,4,4,4]	[TOS]	323.15	0.599	0.00611
[P1,4,4,4][TOS]	[P1,4,4,4]	[TOS]	323.15	0.5	0.00614
[P1,4,4,4][TOS]	[P1,4,4,4]	[TOS]	323.15	0.198	0.002
[P1,4,4,4][TOS]	[P1,4,4,4]	[TOS]	323.15	0.096	0.00173
[P1,4,4,4][TOS]	[P1,4,4,4]	[TOS]	323.15	0.0111	0.000122
[BMIM][BF4]	[BMIM]	[BF4]	327.91	467.2	0.6017
[BMIM][BF4]	[BMIM]	[BF4]	322.94	432.4	0.6017
[BMIM][BF4]	[BMIM]	[BF4]	318.08	396.6	0.6017
[BMIM][BF4]	[BMIM]	[BF4]	357.9	388.6	0.5507
[BMIM][BF4]	[BMIM]	[BF4]	313.12	365.8	0.6017
[BMIM][BF4]	[BMIM]	[BF4]	352.69	365.8	0.5507
[BMIM][BF4]	[BMIM]	[BF4]	347.66	338.2	0.5507
[BMIM][BF4]	[BMIM]	[BF4]	342.78	311.2	0.5507
[BMIM][BF4]	[BMIM]	[BF4]	337.86	284.6	0.5507
[BMIM][BF4]	[BMIM]	[BF4]	332.94	261.2	0.5507
[BMIM][BF4]	[BMIM]	[BF4]	327.96	230.6	0.5507
[BMIM][BF4]	[BMIM]	[BF4]	322.95	202.2	0.5507
[BMIM][BF4]	[BMIM]	[BF4]	318.07	174.6	0.5507
[BMIM][BF4]	[BMIM]	[BF4]	313.12	144.4	0.5507
[BMIM][BF4]	[BMIM]	[BF4]	367.92	128.88	0.4005
[BMIM][BF4]	[BMIM]	[BF4]	338.17	128.56	0.4825
[BMIM][BF4]	[BMIM]	[BF4]	363.02	119.68	0.4005
[BMIM][BF4]	[BMIM]	[BF4]	333.1	114.06	0.4825
[BMIM][BF4]	[BMIM]	[BF4]	357.69	110.63	0.4005
[BMIM][BF4]	[BMIM]	[BF4]	352.82	102.33	0.4005
[BMIM][BF4]	[BMIM]	[BF4]	327.99	100.71	0.4825
[BMIM][BF4]	[BMIM]	[BF4]	348.08	94.73	0.4005
[BMIM][BF4]	[BMIM]	[BF4]	323.1	89.21	0.4825
[BMIM][BF4]	[BMIM]	[BF4]	343.12	87.48	0.4005
[BMIM][BF4]	[BMIM]	[BF4]	338.28	80.53	0.4005
[BMIM][BF4]	[BMIM]	[BF4]	367.96	80.47	0.3035
[BMIM][BF4]	[BMIM]	[BF4]	318.16	79.31	0.4825
[BMIM][BF4]	[BMIM]	[BF4]	362.91	75.22	0.3035
[BMIM][BF4]	[BMIM]	[BF4]	333.19	73.43	0.4005
[BMIM][BF4]	[BMIM]	[BF4]	313.27	70.46	0.4825
[BMIM][BF4]	[BMIM]	[BF4]	357.96	70.12	0.3035
[BMIM][BF4]	[BMIM]	[BF4]	328.12	67.03	0.4005
[BMIM][BF4]	[BMIM]	[BF4]	353.11	65.12	0.3035
[BMIM][BF4]	[BMIM]	[BF4]	308.16	62.06	0.4825
[BMIM][BF4]	[BMIM]	[BF4]	323.22	60.98	0.4005
[BMIM][BF4]	[BMIM]	[BF4]	347.95	60.27	0.3035
[BMIM][BF4]	[BMIM]	[BF4]	342.73	55.77	0.3035
[BMIM][BF4]	[BMIM]	[BF4]	318.13	55.13	0.4005
[BMIM][BF4]	[BMIM]	[BF4]	303.16	54.96	0.4825
[BMIM][BF4]	[BMIM]	[BF4]	337.75	51.57	0.3035
[BMIM][BF4]	[BMIM]	[BF4]	313	49.53	0.4005
[BMIM][BF4]	[BMIM]	[BF4]	298.28	48.61	0.4825
[BMIM][BF4]	[BMIM]	[BF4]	332.82	47.57	0.3035
[BMIM][BF4]	[BMIM]	[BF4]	308.1	44.58	0.4005
[BMIM][BF4]	[BMIM]	[BF4]	368.22	44.18	0.1998
[BMIM][BF4]	[BMIM]	[BF4]	328.12	43.67	0.3035
[BMIM][BF4]	[BMIM]	[BF4]	293.32	43.01	0.4825
[BMIM][BF4]	[BMIM]	[BF4]	363.16	41.5	0.1998
[BMIM][BF4]	[BMIM]	[BF4]	323.16	40.02	0.3035
[BMIM][BF4]	[BMIM]	[BF4]	303.11	39.93	0.4005
[BMIM][BF4]	[BMIM]	[BF4]	358.16	38.84	0.1998
[BMIM][BF4]	[BMIM]	[BF4]	288.55	38.01	0.4825
[BMIM][BF4]	[BMIM]	[BF4]	318.28	36.67	0.3035
[BMIM][BF4]	[BMIM]	[BF4]	353.16	36.29	0.1998
[BMIM][BF4]	[BMIM]	[BF4]	298.15	35.73	0.4005
[BMIM][BF4]	[BMIM]	[BF4]	348.15	33.78	0.1998
[BMIM][BF4]	[BMIM]	[BF4]	283.39	33.46	0.4825
[BMIM][BF4]	[BMIM]	[BF4]	313.39	33.32	0.3035
[BMIM][BF4]	[BMIM]	[BF4]	293.33	31.98	0.4005
[BMIM][BF4]	[BMIM]	[BF4]	343.13	31.37	0.1998
[BMIM][BF4]	[BMIM]	[BF4]	308.36	30.12	0.3035
[BMIM][BF4]	[BMIM]	[BF4]	278.47	29.26	0.4825
[BMIM][BF4]	[BMIM]	[BF4]	338.12	29.09	0.1998
[BMIM][BF4]	[BMIM]	[BF4]	288.51	28.38	0.4005
[BMIM][BF4]	[BMIM]	[BF4]	303.4	27.22	0.3035
[BMIM][BF4]	[BMIM]	[BF4]	333.18	26.86	0.1998
[BMIM][BF4]	[BMIM]	[BF4]	283.52	25.08	0.4005
[BMIM][BF4]	[BMIM]	[BF4]	328.12	24.66	0.1998
[BMIM][BF4]	[BMIM]	[BF4]	298.47	24.47	0.3035
[BMIM][BF4]	[BMIM]	[BF4]	323.15	22.69	0.1998
[BMIM][BF4]	[BMIM]	[BF4]	278.68	22.33	0.4005
[BMIM][BF4]	[BMIM]	[BF4]	293.5	21.92	0.3035
[BMIM][BF4]	[BMIM]	[BF4]	318.12	20.74	0.1998
[BMIM][BF4]	[BMIM]	[BF4]	368.14	19.89	0.1022
[BMIM][BF4]	[BMIM]	[BF4]	288.47	19.57	0.3035
[BMIM][BF4]	[BMIM]	[BF4]	313.15	18.86	0.1998
[BMIM][BF4]	[BMIM]	[BF4]	363.16	18.75	0.1022
[BMIM][BF4]	[BMIM]	[BF4]	358.17	17.69	0.1022
[BMIM][BF4]	[BMIM]	[BF4]	283.61	17.42	0.3035
[BMIM][BF4]	[BMIM]	[BF4]	308.19	17.1	0.1998
[BMIM][BF4]	[BMIM]	[BF4]	353.16	16.64	0.1022
[BMIM][BF4]	[BMIM]	[BF4]	278.53	15.47	0.3035
[BMIM][BF4]	[BMIM]	[BF4]	303.19	15.42	0.1998
[BMIM][BF4]	[BMIM]	[BF4]	348.12	15.39	0.1022
[BMIM][BF4]	[BMIM]	[BF4]	343.14	14.38	0.1022
[BMIM][BF4]	[BMIM]	[BF4]	298.17	13.88	0.1998
[BMIM][BF4]	[BMIM]	[BF4]	338.16	13.44	0.1022
[BMIM][BF4]	[BMIM]	[BF4]	293.17	12.43	0.1998
[BMIM][BF4]	[BMIM]	[BF4]	333.16	12.39	0.1022
[BMIM][BF4]	[BMIM]	[BF4]	328.14	11.43	0.1022
[BMIM][BF4]	[BMIM]	[BF4]	323.11	10.44	0.1022
[BMIM][BF4]	[BMIM]	[BF4]	318.11	9.68	0.1022
[BMIM][BF4]	[BMIM]	[BF4]	313.19	8.85	0.1022
[BMIM][BF4]	[BMIM]	[BF4]	308.15	8.03	0.1022
[BMIM][BF4]	[BMIM]	[BF4]	303.15	7.4	0.1022
[BMIM][BF4]	[BMIM]	[BF4]	298.14	6.59	0.1022
[BMIM][BF4]	[BMIM]	[BF4]	293.13	5.87	0.1022
[BMIM][BF4]	[BMIM]	[BF4]	298.05	20.002	0.277
[BMIM][BF4]	[BMIM]	[BF4]	283.05	20.0019	0.364
[BMIM][BF4]	[BMIM]	[BF4]	323.15	20	0.182
[BMIM][BF4]	[BMIM]	[BF4]	348.05	19.999	0.133
[BMIM][BF4]	[BMIM]	[BF4]	348.15	15.0024	0.103
[BMIM][BF4]	[BMIM]	[BF4]	323.15	15.0011	0.143
[BMIM][BF4]	[BMIM]	[BF4]	297.95	15.0008	0.221
[BMIM][BF4]	[BMIM]	[BF4]	283.15	15.0006	0.295
[BMIM][BF4]	[BMIM]	[BF4]	298.15	13.0022	0.197
[BMIM][BF4]	[BMIM]	[BF4]	283.05	13.0019	0.265
[BMIM][BF4]	[BMIM]	[BF4]	348.15	13	0.089
[BMIM][BF4]	[BMIM]	[BF4]	323.15	12.9965	0.127
[BMIM][BF4]	[BMIM]	[BF4]	347.95	10.0027	0.071
[BMIM][BF4]	[BMIM]	[BF4]	323.15	10.002	0.1
[BMIM][BF4]	[BMIM]	[BF4]	283.05	9.9967	0.216
[BMIM][BF4]	[BMIM]	[BF4]	297.95	9.9967	0.158
[BMIM][BF4]	[BMIM]	[BF4]	298.15	7.0022	0.116
[BMIM][BF4]	[BMIM]	[BF4]	283.25	6.9962	0.159
[BMIM][BF4]	[BMIM]	[BF4]	323.15	6.9962	0.073
[BMIM][BF4]	[BMIM]	[BF4]	348.15	6.9956	0.051
[BMIM][BF4]	[BMIM]	[BF4]	348.05	4.0018	0.03
[BMIM][BF4]	[BMIM]	[BF4]	283.05	4.001	0.096
[BMIM][BF4]	[BMIM]	[BF4]	323.15	3.997	0.044
[BMIM][BF4]	[BMIM]	[BF4]	298.15	3.9956	0.069
[BMIM][BF4]	[BMIM]	[BF4]	348.05	1.0018	0.007
[BMIM][BF4]	[BMIM]	[BF4]	323.15	1.0014	0.012
[BMIM][BF4]	[BMIM]	[BF4]	298.05	1.0013	0.019
[BMIM][BF4]	[BMIM]	[BF4]	283.05	1.001	0.026
[BMIM][BF4]	[BMIM]	[BF4]	282.95	0.5015	0.013
[BMIM][BF4]	[BMIM]	[BF4]	348.15	0.5013	0.003
[BMIM][BF4]	[BMIM]	[BF4]	323.15	0.5011	0.006
[BMIM][BF4]	[BMIM]	[BF4]	298.15	0.5002	0.01
[BMIM][BF4]	[BMIM]	[BF4]	348.15	0.102	0.002
[BMIM][BF4]	[BMIM]	[BF4]	282.75	0.1017	0.002
[BMIM][BF4]	[BMIM]	[BF4]	323.25	0.1015	0.003
[BMIM][BF4]	[BMIM]	[BF4]	297.95	0.0973	0.002
[BMIM][PF6]	[BMIM]	[PF6]	323.25	19.9978	0.197
[BMIM][PF6]	[BMIM]	[PF6]	283.05	19.9975	0.379
[BMIM][PF6]	[BMIM]	[PF6]	348.25	19.9951	0.149
[BMIM][PF6]	[BMIM]	[PF6]	298.05	19.9919	0.291
[BMIM][PF6]	[BMIM]	[PF6]	323.25	15.0027	0.155
[BMIM][PF6]	[BMIM]	[PF6]	348.05	14.9985	0.113
[BMIM][PF6]	[BMIM]	[PF6]	283.05	14.998	0.309
[BMIM][PF6]	[BMIM]	[PF6]	298.05	14.9942	0.233
[BMIM][PF6]	[BMIM]	[PF6]	348.15	13.0032	0.099
[BMIM][PF6]	[BMIM]	[PF6]	282.05	13.0027	0.284
[BMIM][PF6]	[BMIM]	[PF6]	323.15	13.0023	0.136
[BMIM][PF6]	[BMIM]	[PF6]	298.05	12.999	0.208
[BMIM][PF6]	[BMIM]	[PF6]	347.95	10.0023	0.078
[BMIM][PF6]	[BMIM]	[PF6]	283.65	9.9996	0.224
[BMIM][PF6]	[BMIM]	[PF6]	323.15	9.9979	0.109
[BMIM][PF6]	[BMIM]	[PF6]	298.05	9.9941	0.167
[BMIM][PF6]	[BMIM]	[PF6]	323.15	7.0004	0.079
[BMIM][PF6]	[BMIM]	[PF6]	348.05	7.0001	0.056
[BMIM][PF6]	[BMIM]	[PF6]	298.15	7	0.122
[BMIM][PF6]	[BMIM]	[PF6]	283.75	6.9959	0.167
[BMIM][PF6]	[BMIM]	[PF6]	348.05	3.9969	0.032
[BMIM][PF6]	[BMIM]	[PF6]	298.15	3.9963	0.072
[BMIM][PF6]	[BMIM]	[PF6]	323.25	3.9961	0.047
[BMIM][PF6]	[BMIM]	[PF6]	283.55	3.9956	0.102
[BMIM][PF6]	[BMIM]	[PF6]	298.05	1.002	0.018
[BMIM][PF6]	[BMIM]	[PF6]	323.15	1.002	0.012
[BMIM][PF6]	[BMIM]	[PF6]	283.05	1.0018	0.029
[BMIM][PF6]	[BMIM]	[PF6]	348.05	1.0003	0.007
[BMIM][PF6]	[BMIM]	[PF6]	323.15	0.5026	0.006
[BMIM][PF6]	[BMIM]	[PF6]	298.05	0.5015	0.009
[BMIM][PF6]	[BMIM]	[PF6]	283.05	0.5009	0.016
[BMIM][PF6]	[BMIM]	[PF6]	348.05	0.5008	0.002
[BMIM][PF6]	[BMIM]	[PF6]	348.15	0.1021	0.001
[BMIM][PF6]	[BMIM]	[PF6]	323.25	0.102	0.002
[BMIM][PF6]	[BMIM]	[PF6]	298.05	0.1015	0.001
[BMIM][PF6]	[BMIM]	[PF6]	283.05	0.0969	0.004
[BMIM][BF4]	[BMIM]	[BF4]	344.27	0.92	0.008101
[BMIM][BF4]	[BMIM]	[BF4]	342.96	0.91046	0.008173
[BMIM][BF4]	[BMIM]	[BF4]	334.15	0.89028	0.009546
[BMIM][BF4]	[BMIM]	[BF4]	324.06	0.86092	0.01104
[BMIM][BF4]	[BMIM]	[BF4]	323.19	0.84666	0.01126
[BMIM][BF4]	[BMIM]	[BF4]	324.18	0.8247	0.01104
[BMIM][BF4]	[BMIM]	[BF4]	313.99	0.79791	0.01332
[BMIM][BF4]	[BMIM]	[BF4]	303.38	0.77797	0.01623
[BMIM][BF4]	[BMIM]	[BF4]	303.9	0.76576	0.016
[BMIM][BF4]	[BMIM]	[BF4]	343.83	0.26387	0.007948
[BMIM][BF4]	[BMIM]	[BF4]	303.93	0.21588	0.01591
[BMIM][BF4]	[BMIM]	[BF4]	322.15	90	0.431633
[BMIM][BF4]	[BMIM]	[BF4]	317.45	86.2	0.444479
[BMIM][BF4]	[BMIM]	[BF4]	312.45	81.8	0.453401
[BMIM][BF4]	[BMIM]	[BF4]	322.15	81	0.410427
[BMIM][BF4]	[BMIM]	[BF4]	307.55	78.3	0.467223
[BMIM][BF4]	[BMIM]	[BF4]	317.45	77.5	0.421224
[BMIM][BF4]	[BMIM]	[BF4]	322.15	75.6	0.401656
[BMIM][BF4]	[BMIM]	[BF4]	312.45	73.5	0.436699
[BMIM][BF4]	[BMIM]	[BF4]	317.45	72.4	0.410427
[BMIM][BF4]	[BMIM]	[BF4]	307.55	69.8	0.448632
[BMIM][BF4]	[BMIM]	[BF4]	312.45	69.1	0.424237
[BMIM][BF4]	[BMIM]	[BF4]	322.15	67.2	0.372818
[BMIM][BF4]	[BMIM]	[BF4]	307.55	65.5	0.433815
[BMIM][BF4]	[BMIM]	[BF4]	317.45	63.9	0.385876
[BMIM][BF4]	[BMIM]	[BF4]	322.15	61.4	0.35733
[BMIM][BF4]	[BMIM]	[BF4]	312.45	61	0.399219
[BMIM][BF4]	[BMIM]	[BF4]	317.45	58.7	0.366532
[BMIM][BF4]	[BMIM]	[BF4]	307.55	57.7	0.40964
[BMIM][BF4]	[BMIM]	[BF4]	312.45	56.1	0.378107
[BMIM][BF4]	[BMIM]	[BF4]	307.55	53.3	0.386727
[BMIM][BF4]	[BMIM]	[BF4]	322.15	50.6	0.308083
[BMIM][BF4]	[BMIM]	[BF4]	317.45	48.3	0.329068
[BMIM][BF4]	[BMIM]	[BF4]	312.45	46.3	0.340076
[BMIM][BF4]	[BMIM]	[BF4]	322.15	46	0.290325
[BMIM][BF4]	[BMIM]	[BF4]	307.55	44	0.350729
[BMIM][BF4]	[BMIM]	[BF4]	317.45	44	0.308083
[BMIM][BF4]	[BMIM]	[BF4]	312.45	42	0.319784
[BMIM][BF4]	[BMIM]	[BF4]	322.15	40.5	0.269226
[BMIM][BF4]	[BMIM]	[BF4]	307.55	40	0.329068
[BMIM][BF4]	[BMIM]	[BF4]	317.45	38.4	0.284588
[BMIM][BF4]	[BMIM]	[BF4]	312.45	36.3	0.293724
[BMIM][BF4]	[BMIM]	[BF4]	307.55	34.3	0.299316
[BMIM][BF4]	[BMIM]	[BF4]	322.15	32.5	0.228446
[BMIM][BF4]	[BMIM]	[BF4]	317.45	30.8	0.236436
[BMIM][BF4]	[BMIM]	[BF4]	312.45	29.1	0.24939
[BMIM][BF4]	[BMIM]	[BF4]	307.55	27.4	0.259441
[BMIM][BF4]	[BMIM]	[BF4]	322.15	20.8	0.1659
[BMIM][BF4]	[BMIM]	[BF4]	317.45	19.7	0.170591
[BMIM][BF4]	[BMIM]	[BF4]	312.45	18.5	0.173689
[BMIM][BF4]	[BMIM]	[BF4]	307.55	17.5	0.182846
[HMIM][BF4]	[HMIM]	[BF4]	322.15	86.4	0.458087
[HMIM][BF4]	[HMIM]	[BF4]	317.45	82.3	0.476056
[HMIM][BF4]	[HMIM]	[BF4]	322.15	79.2	0.436699
[HMIM][BF4]	[HMIM]	[BF4]	312.45	78.3	0.489948
[HMIM][BF4]	[HMIM]	[BF4]	322.15	77	0.433815
[HMIM][BF4]	[HMIM]	[BF4]	317.45	75.4	0.448632
[HMIM][BF4]	[HMIM]	[BF4]	322.15	74.7	0.424237
[HMIM][BF4]	[HMIM]	[BF4]	307.55	74.1	0.505345
[HMIM][BF4]	[HMIM]	[BF4]	317.45	73.2	0.445175
[HMIM][BF4]	[HMIM]	[BF4]	312.45	71.1	0.465291
[HMIM][BF4]	[HMIM]	[BF4]	317.45	70.8	0.437415
[HMIM][BF4]	[HMIM]	[BF4]	312.45	69.3	0.460729
[HMIM][BF4]	[HMIM]	[BF4]	322.15	67.2	0.405675
[HMIM][BF4]	[HMIM]	[BF4]	307.55	67	0.477294
[HMIM][BF4]	[HMIM]	[BF4]	312.45	67	0.454075
[HMIM][BF4]	[HMIM]	[BF4]	307.55	65.2	0.463346
[HMIM][BF4]	[HMIM]	[BF4]	317.45	63.9	0.420466
[HMIM][BF4]	[HMIM]	[BF4]	307.55	63.2	0.44378
[HMIM][BF4]	[HMIM]	[BF4]	322.15	61.5	0.380718
[HMIM][BF4]	[HMIM]	[BF4]	312.45	60.5	0.430902
[HMIM][BF4]	[HMIM]	[BF4]	317.45	58.5	0.390948
[HMIM][BF4]	[HMIM]	[BF4]	307.55	57.1	0.415103
[HMIM][BF4]	[HMIM]	[BF4]	322.15	56.3	0.362883
[HMIM][BF4]	[HMIM]	[BF4]	312.45	55.4	0.404875
[HMIM][BF4]	[HMIM]	[BF4]	317.45	53.6	0.371927
[HMIM][BF4]	[HMIM]	[BF4]	307.55	52.2	0.395938
[HMIM][BF4]	[HMIM]	[BF4]	312.45	50.7	0.385876
[HMIM][BF4]	[HMIM]	[BF4]	322.15	48.9	0.322907
[HMIM][BF4]	[HMIM]	[BF4]	307.55	47.9	0.361043
[HMIM][BF4]	[HMIM]	[BF4]	317.45	46.4	0.336115
[HMIM][BF4]	[HMIM]	[BF4]	312.45	43.9	0.352629
[HMIM][BF4]	[HMIM]	[BF4]	322.15	43.1	0.31024
[HMIM][BF4]	[HMIM]	[BF4]	307.55	41.5	0.33909
[HMIM][BF4]	[HMIM]	[BF4]	317.45	41	0.318737
[HMIM][BF4]	[HMIM]	[BF4]	312.45	38.7	0.336115
[HMIM][BF4]	[HMIM]	[BF4]	322.15	36.6	0.274023
[HMIM][BF4]	[HMIM]	[BF4]	307.55	36.4	0.304821
[HMIM][BF4]	[HMIM]	[BF4]	317.45	34.5	0.284588
[HMIM][BF4]	[HMIM]	[BF4]	312.45	32.7	0.300424
[HMIM][BF4]	[HMIM]	[BF4]	307.55	30.8	0.231128
[HMIM][BF4]	[HMIM]	[BF4]	322.15	25.3	0.202006
[HMIM][BF4]	[HMIM]	[BF4]	317.45	24	0.207722
[HMIM][BF4]	[HMIM]	[BF4]	312.45	22.6	0.216144
[HMIM][BF4]	[HMIM]	[BF4]	307.55	21.3	0.477294
[OMIM][BF4]	[OMIM]	[BF4]	322.15	87.2	0.47914
[OMIM][BF4]	[OMIM]	[BF4]	322.15	87	0.465937
[OMIM][BF4]	[OMIM]	[BF4]	317.45	82.7	0.497479
[OMIM][BF4]	[OMIM]	[BF4]	317.45	82.5	0.492871
[OMIM][BF4]	[OMIM]	[BF4]	322.15	81.7	0.438129
[OMIM][BF4]	[OMIM]	[BF4]	312.45	78.2	0.506448
[OMIM][BF4]	[OMIM]	[BF4]	312.45	77.7	0.505897
[OMIM][BF4]	[OMIM]	[BF4]	317.45	77.7	0.476056
[OMIM][BF4]	[OMIM]	[BF4]	322.15	75.1	0.427218
[OMIM][BF4]	[OMIM]	[BF4]	307.55	73.9	0.515103
[OMIM][BF4]	[OMIM]	[BF4]	307.55	73.5	0.511354
[OMIM][BF4]	[OMIM]	[BF4]	312.45	73.5	0.483397
[OMIM][BF4]	[OMIM]	[BF4]	317.45	71.4	0.453401
[OMIM][BF4]	[OMIM]	[BF4]	307.55	69.2	0.500317
[OMIM][BF4]	[OMIM]	[BF4]	312.45	67.4	0.462694
[OMIM][BF4]	[OMIM]	[BF4]	317.45	66	0.436699
[OMIM][BF4]	[OMIM]	[BF4]	307.55	63.5	0.481581
[OMIM][BF4]	[OMIM]	[BF4]	322.15	63.4	0.400033
[OMIM][BF4]	[OMIM]	[BF4]	312.45	62.4	0.447255
[OMIM][BF4]	[OMIM]	[BF4]	317.45	60.2	0.416645
[OMIM][BF4]	[OMIM]	[BF4]	307.55	59.1	0.461386
[OMIM][BF4]	[OMIM]	[BF4]	312.45	57	0.424237
[OMIM][BF4]	[OMIM]	[BF4]	322.15	56.1	0.372818
[OMIM][BF4]	[OMIM]	[BF4]	307.55	53.8	0.436699
[OMIM][BF4]	[OMIM]	[BF4]	317.45	53.3	0.387576
[OMIM][BF4]	[OMIM]	[BF4]	312.45	50.5	0.395112
[OMIM][BF4]	[OMIM]	[BF4]	322.15	49	0.347858
[OMIM][BF4]	[OMIM]	[BF4]	307.55	47.7	0.40964
[OMIM][BF4]	[OMIM]	[BF4]	317.45	46.6	0.480363
[OMIM][BF4]	[OMIM]	[BF4]	312.45	44.1	0.372818
[OMIM][BF4]	[OMIM]	[BF4]	307.55	41.7	0.383308
[BMIM][BF4]	[BMIM]	[BF4]	298.1	20.002	0.277
[BMIM][BF4]	[BMIM]	[BF4]	298	15.001	0.221
[BMIM][BF4]	[BMIM]	[BF4]	298.2	13.002	0.197
[BMIM][BF4]	[BMIM]	[BF4]	298	9.997	0.158
[BMIM][BF4]	[BMIM]	[BF4]	298.2	7.002	0.115
[BMIM][BF4]	[BMIM]	[BF4]	298.2	3.996	0.069
[BMIM][BF4]	[BMIM]	[BF4]	298.1	1.001	0.019
[BMIM][BF4]	[BMIM]	[BF4]	298.2	0.5	0.01
[BMIM][BF4]	[BMIM]	[BF4]	298.2	0.1	0.001
[P4,4,4,4][FOR]	[P4,4,4,4]	[FOR]	298.1	19.996	0.348
[P4,4,4,4][FOR]	[P4,4,4,4]	[FOR]	298.1	12.997	0.251
[P4,4,4,4][FOR]	[P4,4,4,4]	[FOR]	298.2	9.999	0.203
[P4,4,4,4][FOR]	[P4,4,4,4]	[FOR]	298.1	7.004	0.151
[P4,4,4,4][FOR]	[P4,4,4,4]	[FOR]	298.1	1.004	0.034
[P4,4,4,4][FOR]	[P4,4,4,4]	[FOR]	298.2	0.502	0.024
[P4,4,4,4][FOR]	[P4,4,4,4]	[FOR]	298	0.1	0.008
[BMIM][PF6]	[BMIM]	[PF6]	298.1	19.997	0.286
[BMIM][PF6]	[BMIM]	[PF6]	298.1	15.003	0.229
[BMIM][PF6]	[BMIM]	[PF6]	298.1	12.996	0.202
[BMIM][PF6]	[BMIM]	[PF6]	298.1	9.997	0.161
[BMIM][PF6]	[BMIM]	[PF6]	298	7.003	0.118
[BMIM][PF6]	[BMIM]	[PF6]	298	3.998	0.07
[BMIM][PF6]	[BMIM]	[PF6]	298.2	1.004	0.019
[BMIM][PF6]	[BMIM]	[PF6]	298.1	0.504	0.009
[BMIM][PF6]	[BMIM]	[PF6]	298	0.105	0.001
[EMIM][Tf2N]	[EMIM]	[Tf2N]	298.1	19.998	0.39
[EMIM][Tf2N]	[EMIM]	[Tf2N]	298.1	14.995	0.317
[EMIM][Tf2N]	[EMIM]	[Tf2N]	298.1	12.999	0.287
[EMIM][Tf2N]	[EMIM]	[Tf2N]	298.2	9.997	0.234
[EMIM][Tf2N]	[EMIM]	[Tf2N]	298.2	6.998	0.174
[EMIM][Tf2N]	[EMIM]	[Tf2N]	297.9	3.998	0.107
[EMIM][Tf2N]	[EMIM]	[Tf2N]	298	0.998	0.03
[EMIM][Tf2N]	[EMIM]	[Tf2N]	298.1	0.5	0.015
[EMIM][Tf2N]	[EMIM]	[Tf2N]	298.2	0.1	0.004
[HMIM][Tf2N]	[HMIM]	[Tf2N]	297.3	19.748	0.433
[HMIM][Tf2N]	[HMIM]	[Tf2N]	297.3	14.82	0.36
[HMIM][Tf2N]	[HMIM]	[Tf2N]	297.4	12.848	0.326
[HMIM][Tf2N]	[HMIM]	[Tf2N]	297.4	9.89	0.27
[HMIM][Tf2N]	[HMIM]	[Tf2N]	297.3	6.922	0.203
[HMIM][Tf2N]	[HMIM]	[Tf2N]	297.4	3.943	0.126
[HMIM][Tf2N]	[HMIM]	[Tf2N]	297.3	0.983	0.037
[HMIM][Tf2N]	[HMIM]	[Tf2N]	297.4	0.487	0.02
[HMIM][Tf2N]	[HMIM]	[Tf2N]	297.4	0.091	0.006
[BMIM][TFA]	[BMIM]	[TFA]	298.1	19.996	0.301
[BMIM][TFA]	[BMIM]	[TFA]	298.1	14.996	0.239
[BMIM][TFA]	[BMIM]	[TFA]	298.1	13.004	0.213
[BMIM][TFA]	[BMIM]	[TFA]	298.1	9.996	0.172
[BMIM][TFA]	[BMIM]	[TFA]	298.2	6.992	0.123
[BMIM][TFA]	[BMIM]	[TFA]	298	3.999	0.075
[BMIM][TFA]	[BMIM]	[TFA]	298.1	1.001	0.022
[BMIM][TFA]	[BMIM]	[TFA]	298.1	0.504	0.013
[BMIM][TFA]	[BMIM]	[TFA]	298.1	0.105	0.005
[EMIM][TFA]	[EMIM]	[TFA]	298.1	19.996	0.282
[EMIM][TFA]	[EMIM]	[TFA]	298.1	14.998	0.226
[EMIM][TFA]	[EMIM]	[TFA]	298.1	12.997	0.201
[EMIM][TFA]	[EMIM]	[TFA]	298.1	9.999	0.16
[EMIM][TFA]	[EMIM]	[TFA]	298.1	6.997	0.115
[EMIM][TFA]	[EMIM]	[TFA]	298.1	3.999	0.068
[EMIM][TFA]	[EMIM]	[TFA]	298.1	0.998	0.018
[EMIM][TFA]	[EMIM]	[TFA]	298.1	0.498	0.009
[EMIM][TFA]	[EMIM]	[TFA]	298.1	0.1	0.001
[BMIM][BF4]	[BMIM]	[BF4]	298.15	60.7	0.528048
[BMIM][BF4]	[BMIM]	[BF4]	298.15	51.7	0.492797
[BMIM][BF4]	[BMIM]	[BF4]	298.15	40.6	0.427826
[BMIM][BF4]	[BMIM]	[BF4]	298.15	31.4	0.36175
[BMIM][BF4]	[BMIM]	[BF4]	298.15	21.3	0.270041
[BMIM][BF4]	[BMIM]	[BF4]	298.15	13	0.175877
[BMIM][BF4]	[BMIM]	[BF4]	298.15	6.5	0.104854
[BMIM][BF4]	[BMIM]	[BF4]	313.2	59.8	0.466
[BMIM][BF4]	[BMIM]	[BF4]	333.2	59.5	0.362
[BMIM][BF4]	[BMIM]	[BF4]	313.2	55.3	0.4402
[BMIM][BF4]	[BMIM]	[BF4]	298.2	55	0.49
[BMIM][BF4]	[BMIM]	[BF4]	333.2	54.3	0.324
[BMIM][BF4]	[BMIM]	[BF4]	333.2	53.9	0.36
[BMIM][BF4]	[BMIM]	[BF4]	298.2	49.3	0.477
[BMIM][BF4]	[BMIM]	[BF4]	313.2	49.1	0.4106
[BMIM][BF4]	[BMIM]	[BF4]	313.2	48.1	0.38
[BMIM][BF4]	[BMIM]	[BF4]	333.2	44.2	0.3167
[BMIM][BF4]	[BMIM]	[BF4]	298.2	43.3	0.435
[BMIM][BF4]	[BMIM]	[BF4]	313.2	42.9	0.35
[BMIM][BF4]	[BMIM]	[BF4]	333.2	41.7	0.284
[BMIM][BF4]	[BMIM]	[BF4]	313.2	38.4	0.325
[BMIM][BF4]	[BMIM]	[BF4]	313.2	38.3	0.337
[BMIM][BF4]	[BMIM]	[BF4]	333.2	37.6	0.244
[BMIM][BF4]	[BMIM]	[BF4]	298.2	36.9	0.393
[BMIM][BF4]	[BMIM]	[BF4]	333.2	34.1	0.2615
[BMIM][BF4]	[BMIM]	[BF4]	298.2	32.9	0.331
[BMIM][BF4]	[BMIM]	[BF4]	313.2	32.6	0.285
[BMIM][BF4]	[BMIM]	[BF4]	333.2	29.6	0.2
[BMIM][BF4]	[BMIM]	[BF4]	313.2	28.6	0.2849
[BMIM][BF4]	[BMIM]	[BF4]	333.2	24.4	0.169
[BMIM][BF4]	[BMIM]	[BF4]	333.2	24.2	0.2077
[BMIM][BF4]	[BMIM]	[BF4]	298.2	23.1	0.264
[BMIM][BF4]	[BMIM]	[BF4]	313.2	22.7	0.197
[BMIM][BF4]	[BMIM]	[BF4]	313.2	19.4	0.2055
[BMIM][BF4]	[BMIM]	[BF4]	313.2	16.5	0.154
[BMIM][BF4]	[BMIM]	[BF4]	333.2	16.5	0.119
[BMIM][BF4]	[BMIM]	[BF4]	333.2	14.8	0.1304
[BMIM][BF4]	[BMIM]	[BF4]	298.2	12.4	0.137
[BMIM][BF4]	[BMIM]	[BF4]	333.2	11.3	0.093
[BMIM][BF4]	[BMIM]	[BF4]	313.2	11.2	0.1158
[BMIM][BF4]	[BMIM]	[BF4]	333.2	9.8	0.072
[BMIM][BF4]	[BMIM]	[BF4]	313.2	8.6	0.082
[BMIM][BF4]	[BMIM]	[BF4]	323.1	1.92	0.0208
[BMIM][BF4]	[BMIM]	[BF4]	352.4	1.9	0.0131
[BMIM][BF4]	[BMIM]	[BF4]	342.9	1.81	0.014
[BMIM][BF4]	[BMIM]	[BF4]	313.3	1.79	0.0227
[BMIM][BF4]	[BMIM]	[BF4]	332.9	1.71	0.0152
[BMIM][BF4]	[BMIM]	[BF4]	298.6	1.59	0.0261
[BMIM][BF4]	[BMIM]	[BF4]	352	1.2	0.0078
[BMIM][BF4]	[BMIM]	[BF4]	298.6	1.18	0.0196
[BMIM][BF4]	[BMIM]	[BF4]	333.8	1.07	0.0094
[BMIM][BF4]	[BMIM]	[BF4]	324.5	1.01	0.0102
[BMIM][BF4]	[BMIM]	[BF4]	313.1	0.92	0.012
[BMIM][BF4]	[BMIM]	[BF4]	298.4	0.81	0.014
[BMIM][BF4]	[BMIM]	[BF4]	354.2	0.65	0.004
[BMIM][BF4]	[BMIM]	[BF4]	298.6	0.61	0.0101
[BMIM][BF4]	[BMIM]	[BF4]	324.7	0.46	0.0043
[BMIM][PF6]	[BMIM]	[PF6]	323.6	1.86	0.0223
[BMIM][PF6]	[BMIM]	[PF6]	353.8	1.81	0.0145
[BMIM][PF6]	[BMIM]	[PF6]	334.3	1.8	0.0186
[BMIM][PF6]	[BMIM]	[PF6]	313.6	1.71	0.0239
[BMIM][PF6]	[BMIM]	[PF6]	352.5	1.71	0.0136
[BMIM][PF6]	[BMIM]	[PF6]	342.4	1.69	0.0157
[BMIM][PF6]	[BMIM]	[PF6]	344.7	1.63	0.0144
[BMIM][PF6]	[BMIM]	[PF6]	322.7	1.62	0.0189
[BMIM][PF6]	[BMIM]	[PF6]	332.3	1.58	0.0168
[BMIM][PF6]	[BMIM]	[PF6]	354.9	1.56	0.0123
[BMIM][PF6]	[BMIM]	[PF6]	334	1.53	0.0166
[BMIM][PF6]	[BMIM]	[PF6]	298.8	1.49	0.0271
[BMIM][PF6]	[BMIM]	[PF6]	313	1.49	0.0203
[BMIM][PF6]	[BMIM]	[PF6]	332.7	1.46	0.0151
[BMIM][PF6]	[BMIM]	[PF6]	298.3	1.09	0.0197
[BMIM][PF6]	[BMIM]	[PF6]	313.3	1.03	0.0162
[BMIM][PF6]	[BMIM]	[PF6]	312.3	0.97	0.0133
[BMIM][PF6]	[BMIM]	[PF6]	334.4	0.78	0.0077
[BMIM][PF6]	[BMIM]	[PF6]	354.7	0.73	0.0056
[BMIM][PF6]	[BMIM]	[PF6]	313.5	0.64	0.01
[BMIM][Cl]	[BMIM]	[Cl]	373.15	369.46	0.406
[BMIM][Cl]	[BMIM]	[Cl]	368.15	349.47	0.406
[BMIM][Cl]	[BMIM]	[Cl]	363.15	330.17	0.406
[BMIM][Cl]	[BMIM]	[Cl]	358.15	311.9	0.406
[BMIM][Cl]	[BMIM]	[Cl]	353.15	293.64	0.406
[BMIM][Cl]	[BMIM]	[Cl]	373.15	282.26	0.3777
[BMIM][Cl]	[BMIM]	[Cl]	368.15	269.97	0.3777
[BMIM][Cl]	[BMIM]	[Cl]	363.15	255.73	0.3777
[BMIM][Cl]	[BMIM]	[Cl]	358.15	233.5	0.3777
[BMIM][Cl]	[BMIM]	[Cl]	353.15	212.99	0.3777
[BMIM][Cl]	[BMIM]	[Cl]	373.15	184.73	0.343
[BMIM][Cl]	[BMIM]	[Cl]	368.15	171.86	0.343
[BMIM][Cl]	[BMIM]	[Cl]	363.15	157.73	0.343
[BMIM][Cl]	[BMIM]	[Cl]	373.15	149.95	0.3021
[BMIM][Cl]	[BMIM]	[Cl]	358.15	145.27	0.343
[BMIM][Cl]	[BMIM]	[Cl]	368.15	142.39	0.3021
[BMIM][Cl]	[BMIM]	[Cl]	353.15	136.25	0.343
[BMIM][Cl]	[BMIM]	[Cl]	363.15	133.64	0.3021
[BMIM][Cl]	[BMIM]	[Cl]	358.15	121.76	0.3021
[BMIM][Cl]	[BMIM]	[Cl]	373.15	116.68	0.2652
[BMIM][Cl]	[BMIM]	[Cl]	353.15	111.67	0.3021
[BMIM][Cl]	[BMIM]	[Cl]	368.15	109.15	0.2652
[BMIM][Cl]	[BMIM]	[Cl]	363.15	100.04	0.2652
[BMIM][Cl]	[BMIM]	[Cl]	358.15	94.77	0.2652
[BMIM][Cl]	[BMIM]	[Cl]	353.15	90.14	0.2652
[BMIM][Cl]	[BMIM]	[Cl]	373.15	83.89	0.2375
[BMIM][Cl]	[BMIM]	[Cl]	368.15	80.95	0.2375
[BMIM][Cl]	[BMIM]	[Cl]	363.15	75.62	0.2375
[BMIM][Cl]	[BMIM]	[Cl]	358.15	71.52	0.2375
[BMIM][Cl]	[BMIM]	[Cl]	353.15	66.64	0.2375
[BMIM][Cl]	[BMIM]	[Cl]	373.15	56.01	0.1786
[BMIM][Cl]	[BMIM]	[Cl]	368.15	52.98	0.1786
[BMIM][Cl]	[BMIM]	[Cl]	363.15	49.15	0.1786
[BMIM][Cl]	[BMIM]	[Cl]	358.15	46.29	0.1786
[BMIM][Cl]	[BMIM]	[Cl]	353.15	43.38	0.1786
[BMIM][Cl]	[BMIM]	[Cl]	373.15	40.51	0.1522
[BMIM][Cl]	[BMIM]	[Cl]	368.15	38.48	0.1522
[BMIM][Cl]	[BMIM]	[Cl]	363.15	35.82	0.1522
[BMIM][Cl]	[BMIM]	[Cl]	358.15	33.8	0.1522
[BMIM][Cl]	[BMIM]	[Cl]	353.15	31.42	0.1522
[BMIM][Cl]	[BMIM]	[Cl]	373.15	29.69	0.1306
[BMIM][Cl]	[BMIM]	[Cl]	368.15	28.09	0.1306
[BMIM][Cl]	[BMIM]	[Cl]	363.15	26.67	0.1306
[BMIM][Cl]	[BMIM]	[Cl]	358.15	25.25	0.1306
[BMIM][Cl]	[BMIM]	[Cl]	353.15	24.54	0.1306
[BMIM][DBPO4]	[BMIM]	[DBPO4]	313.15	1.754	0.03529
[BMIM][DBPO4]	[BMIM]	[DBPO4]	323.15	1.732	0.02984
[BMIM][DBPO4]	[BMIM]	[DBPO4]	333.15	1.6871	0.02471
[BMIM][DBPO4]	[BMIM]	[DBPO4]	313.15	1.4996	0.02979
[BMIM][DBPO4]	[BMIM]	[DBPO4]	323.15	1.45	0.02519
[BMIM][DBPO4]	[BMIM]	[DBPO4]	333.15	1.3617	0.01965
[BMIM][DBPO4]	[BMIM]	[DBPO4]	313.15	1.0398	0.02056
[BMIM][DBPO4]	[BMIM]	[DBPO4]	323.15	1.0384	0.01782
[BMIM][DBPO4]	[BMIM]	[DBPO4]	333.15	1.0315	0.01497
[BMIM][DBPO4]	[BMIM]	[DBPO4]	323.15	0.7253	0.01255
[BMIM][DBPO4]	[BMIM]	[DBPO4]	333.15	0.7205	0.01049
[BMIM][DBPO4]	[BMIM]	[DBPO4]	313.15	0.7198	0.01412
[BMIM][DBPO4]	[BMIM]	[DBPO4]	323.15	0.4488	0.00773
[BMIM][DBPO4]	[BMIM]	[DBPO4]	333.15	0.4426	0.00619
[BMIM][DBPO4]	[BMIM]	[DBPO4]	313.15	0.4357	0.00849
[BMIM][DBPO4]	[BMIM]	[DBPO4]	333.15	0.2303	0.00317
[BMIM][DBPO4]	[BMIM]	[DBPO4]	323.15	0.2241	0.00372
[BMIM][DBPO4]	[BMIM]	[DBPO4]	313.15	0.2234	0.00426
[EMIM][DEPO4]	[EMIM]	[DEPO4]	333.15	1.9884	0.02041
[EMIM][DEPO4]	[EMIM]	[DEPO4]	333.15	1.9209	0.01962
[EMIM][DEPO4]	[EMIM]	[DEPO4]	323.15	1.8912	0.0234
[EMIM][DEPO4]	[EMIM]	[DEPO4]	313.15	1.8905	0.02666
[EMIM][DEPO4]	[EMIM]	[DEPO4]	333.15	1.7995	0.01852
[EMIM][DEPO4]	[EMIM]	[DEPO4]	323.15	1.752	0.0213
[EMIM][DEPO4]	[EMIM]	[DEPO4]	313.15	1.7464	0.02475
[EMIM][DEPO4]	[EMIM]	[DEPO4]	333.15	1.5775	0.01619
[EMIM][DEPO4]	[EMIM]	[DEPO4]	323.15	1.4879	0.01833
[EMIM][DEPO4]	[EMIM]	[DEPO4]	313.15	1.4796	0.02138
[EMIM][DEPO4]	[EMIM]	[DEPO4]	333.15	1.3141	0.0137
[EMIM][DEPO4]	[EMIM]	[DEPO4]	333.15	1.1114	0.01156
[EMIM][DEPO4]	[EMIM]	[DEPO4]	323.15	1.0363	0.01241
[EMIM][DEPO4]	[EMIM]	[DEPO4]	313.15	1.0259	0.01457
[EMIM][DEPO4]	[EMIM]	[DEPO4]	333.15	0.8632	0.00896
[EMIM][DEPO4]	[EMIM]	[DEPO4]	323.15	0.7253	0.00865
[EMIM][DEPO4]	[EMIM]	[DEPO4]	313.15	0.7171	0.01025
[EMIM][DEPO4]	[EMIM]	[DEPO4]	323.15	0.4613	0.00563
[EMIM][DEPO4]	[EMIM]	[DEPO4]	313.15	0.4447	0.00631
[EMIM][DEPO4]	[EMIM]	[DEPO4]	333.15	0.4123	0.00422
[EMIM][DEPO4]	[EMIM]	[DEPO4]	323.15	0.2572	0.00307
[EMIM][DEPO4]	[EMIM]	[DEPO4]	313.15	0.2379	0.00328
[MMIM][DMPO4]	[MMIM]	[DMPO4]	333.15	1.7464	0.01148
[MMIM][DMPO4]	[MMIM]	[DMPO4]	323.15	1.7395	0.01361
[MMIM][DMPO4]	[MMIM]	[DMPO4]	313.15	1.7313	0.01597
[MMIM][DMPO4]	[MMIM]	[DMPO4]	333.15	1.4831	0.00977
[MMIM][DMPO4]	[MMIM]	[DMPO4]	323.15	1.4671	0.01142
[MMIM][DMPO4]	[MMIM]	[DMPO4]	313.15	1.4486	0.01347
[MMIM][DMPO4]	[MMIM]	[DMPO4]	333.15	0.9791	0.00629
[MMIM][DMPO4]	[MMIM]	[DMPO4]	323.15	0.946	0.00741
[MMIM][DMPO4]	[MMIM]	[DMPO4]	313.15	0.9294	0.00913
[MMIM][DMPO4]	[MMIM]	[DMPO4]	333.15	0.5626	0.00346
[MMIM][DMPO4]	[MMIM]	[DMPO4]	323.15	0.5185	0.004
[MMIM][DMPO4]	[MMIM]	[DMPO4]	313.15	0.4881	0.00459
[BMIM][Tf2N]	[BMIM]	[Tf2N]	373.15	142.61	0.5852
[BMIM][Tf2N]	[BMIM]	[Tf2N]	400.59	140.99	0.5257
[BMIM][Tf2N]	[BMIM]	[Tf2N]	415.25	140.23	0.4866
[BMIM][Tf2N]	[BMIM]	[Tf2N]	371.59	139.59	0.5852
[BMIM][Tf2N]	[BMIM]	[Tf2N]	413.15	137.82	0.4866
[BMIM][Tf2N]	[BMIM]	[Tf2N]	410.37	134.73	0.4866
[BMIM][Tf2N]	[BMIM]	[Tf2N]	393.15	131.51	0.5257
[BMIM][Tf2N]	[BMIM]	[Tf2N]	390.95	128.74	0.5257
[BMIM][Tf2N]	[BMIM]	[Tf2N]	361.93	123.04	0.5852
[BMIM][Tf2N]	[BMIM]	[Tf2N]	381.11	116.25	0.5257
[BMIM][Tf2N]	[BMIM]	[Tf2N]	393.15	115.58	0.4866
[BMIM][Tf2N]	[BMIM]	[Tf2N]	390.87	112.73	0.4866
[BMIM][Tf2N]	[BMIM]	[Tf2N]	453.15	110.73	0.3818
[BMIM][Tf2N]	[BMIM]	[Tf2N]	353.15	108.49	0.5852
[BMIM][Tf2N]	[BMIM]	[Tf2N]	449.41	108.33	0.3818
[BMIM][Tf2N]	[BMIM]	[Tf2N]	352.11	107.13	0.5852
[BMIM][Tf2N]	[BMIM]	[Tf2N]	373.15	106.32	0.5257
[BMIM][Tf2N]	[BMIM]	[Tf2N]	371.43	104.25	0.5257
[BMIM][Tf2N]	[BMIM]	[Tf2N]	439.65	101.98	0.3818
[BMIM][Tf2N]	[BMIM]	[Tf2N]	433.15	97.74	0.3818
[BMIM][Tf2N]	[BMIM]	[Tf2N]	429.86	95.48	0.3818
[BMIM][Tf2N]	[BMIM]	[Tf2N]	373.15	93.41	0.4866
[BMIM][Tf2N]	[BMIM]	[Tf2N]	361.76	92.5	0.5257
[BMIM][Tf2N]	[BMIM]	[Tf2N]	342.43	92.13	0.5852
[BMIM][Tf2N]	[BMIM]	[Tf2N]	371.46	91.72	0.4866
[BMIM][Tf2N]	[BMIM]	[Tf2N]	420.12	89.33	0.3818
[BMIM][Tf2N]	[BMIM]	[Tf2N]	413.15	84.35	0.3818
[BMIM][Tf2N]	[BMIM]	[Tf2N]	353.15	82.54	0.5257
[BMIM][Tf2N]	[BMIM]	[Tf2N]	410.52	82.48	0.3818
[BMIM][Tf2N]	[BMIM]	[Tf2N]	352.11	81.24	0.5257
[BMIM][Tf2N]	[BMIM]	[Tf2N]	333.15	79.07	0.5852
[BMIM][Tf2N]	[BMIM]	[Tf2N]	332.73	78.28	0.5852
[BMIM][Tf2N]	[BMIM]	[Tf2N]	400.63	75.93	0.3818
[BMIM][Tf2N]	[BMIM]	[Tf2N]	453.15	74.83	0.2926
[BMIM][Tf2N]	[BMIM]	[Tf2N]	449.36	73.25	0.2926
[BMIM][Tf2N]	[BMIM]	[Tf2N]	353.15	72.34	0.4866
[BMIM][Tf2N]	[BMIM]	[Tf2N]	352.1	71.97	0.4866
[BMIM][Tf2N]	[BMIM]	[Tf2N]	393.15	70.94	0.3818
[BMIM][Tf2N]	[BMIM]	[Tf2N]	342.45	70.74	0.5257
[BMIM][Tf2N]	[BMIM]	[Tf2N]	390.91	69.43	0.3818
[BMIM][Tf2N]	[BMIM]	[Tf2N]	439.6	69	0.2926
[BMIM][Tf2N]	[BMIM]	[Tf2N]	433.15	66.17	0.2926
[BMIM][Tf2N]	[BMIM]	[Tf2N]	323.13	65.88	0.5852
[BMIM][Tf2N]	[BMIM]	[Tf2N]	429.87	64.75	0.2926
[BMIM][Tf2N]	[BMIM]	[Tf2N]	381.25	63.03	0.3818
[BMIM][Tf2N]	[BMIM]	[Tf2N]	342.53	61.37	0.4866
[BMIM][Tf2N]	[BMIM]	[Tf2N]	333.15	61.19	0.5257
[BMIM][Tf2N]	[BMIM]	[Tf2N]	332.79	60.99	0.5257
[BMIM][Tf2N]	[BMIM]	[Tf2N]	420.21	60.35	0.2926
[BMIM][Tf2N]	[BMIM]	[Tf2N]	373.15	57.89	0.3818
[BMIM][Tf2N]	[BMIM]	[Tf2N]	413.15	57.24	0.2926
[BMIM][Tf2N]	[BMIM]	[Tf2N]	371.5	56.82	0.3818
[BMIM][Tf2N]	[BMIM]	[Tf2N]	410.37	56	0.2926
[BMIM][Tf2N]	[BMIM]	[Tf2N]	313.65	55.27	0.5852
[BMIM][Tf2N]	[BMIM]	[Tf2N]	313.65	54.83	0.5852
[BMIM][Tf2N]	[BMIM]	[Tf2N]	313.15	54.37	0.5852
[BMIM][Tf2N]	[BMIM]	[Tf2N]	333.15	53.39	0.4866
[BMIM][Tf2N]	[BMIM]	[Tf2N]	332.76	52.89	0.4866
[BMIM][Tf2N]	[BMIM]	[Tf2N]	323.15	51.74	0.5257
[BMIM][Tf2N]	[BMIM]	[Tf2N]	400.62	51.5	0.2926
[BMIM][Tf2N]	[BMIM]	[Tf2N]	361.86	50.82	0.3818
[BMIM][Tf2N]	[BMIM]	[Tf2N]	393.15	48.29	0.2926
[BMIM][Tf2N]	[BMIM]	[Tf2N]	390.88	47.29	0.2926
[BMIM][Tf2N]	[BMIM]	[Tf2N]	353.15	45.57	0.3818
[BMIM][Tf2N]	[BMIM]	[Tf2N]	352.12	44.97	0.3818
[BMIM][Tf2N]	[BMIM]	[Tf2N]	314.65	44.48	0.5257
[BMIM][Tf2N]	[BMIM]	[Tf2N]	313.15	43.31	0.5257
[BMIM][Tf2N]	[BMIM]	[Tf2N]	381.22	43.04	0.2926
[BMIM][Tf2N]	[BMIM]	[Tf2N]	453.15	42.24	0.1886
[BMIM][Tf2N]	[BMIM]	[Tf2N]	449.38	41.33	0.1886
[BMIM][Tf2N]	[BMIM]	[Tf2N]	373.15	39.57	0.2926
[BMIM][Tf2N]	[BMIM]	[Tf2N]	342.47	39.43	0.3818
[BMIM][Tf2N]	[BMIM]	[Tf2N]	371.56	39	0.2926
[BMIM][Tf2N]	[BMIM]	[Tf2N]	439.64	38.88	0.1886
[BMIM][Tf2N]	[BMIM]	[Tf2N]	313.57	37.99	0.4866
[BMIM][Tf2N]	[BMIM]	[Tf2N]	313.15	37.58	0.4866
[BMIM][Tf2N]	[BMIM]	[Tf2N]	433.15	37.29	0.1886
[BMIM][Tf2N]	[BMIM]	[Tf2N]	429.89	36.48	0.1886
[BMIM][Tf2N]	[BMIM]	[Tf2N]	361.77	35	0.2926
[BMIM][Tf2N]	[BMIM]	[Tf2N]	333.15	34.37	0.3818
[BMIM][Tf2N]	[BMIM]	[Tf2N]	332.77	34.23	0.3818
[BMIM][Tf2N]	[BMIM]	[Tf2N]	420.16	33.98	0.1886
[BMIM][Tf2N]	[BMIM]	[Tf2N]	413.15	32.25	0.1886
[BMIM][Tf2N]	[BMIM]	[Tf2N]	410.37	31.58	0.1886
[BMIM][Tf2N]	[BMIM]	[Tf2N]	353.15	31.32	0.2926
[BMIM][Tf2N]	[BMIM]	[Tf2N]	352.1	31.05	0.2926
[BMIM][Tf2N]	[BMIM]	[Tf2N]	323.08	29.38	0.3818
[BMIM][Tf2N]	[BMIM]	[Tf2N]	400.64	29.12	0.1886
[BMIM][Tf2N]	[BMIM]	[Tf2N]	393.15	27.25	0.1886
[BMIM][Tf2N]	[BMIM]	[Tf2N]	342.55	27	0.2926
[BMIM][Tf2N]	[BMIM]	[Tf2N]	390.86	26.68	0.1886
[BMIM][Tf2N]	[BMIM]	[Tf2N]	313.5	24.73	0.3818
[BMIM][Tf2N]	[BMIM]	[Tf2N]	313.15	24.67	0.3818
[BMIM][Tf2N]	[BMIM]	[Tf2N]	380.99	24.33	0.1886
[BMIM][Tf2N]	[BMIM]	[Tf2N]	333.15	23.79	0.2926
[BMIM][Tf2N]	[BMIM]	[Tf2N]	332.75	23.5	0.2926
[BMIM][Tf2N]	[BMIM]	[Tf2N]	373.15	22.41	0.1886
[BMIM][Tf2N]	[BMIM]	[Tf2N]	371.43	22.02	0.1886
[BMIM][Tf2N]	[BMIM]	[Tf2N]	323.08	20.24	0.2926
[BMIM][Tf2N]	[BMIM]	[Tf2N]	361.76	19.72	0.1886
[BMIM][Tf2N]	[BMIM]	[Tf2N]	353.15	17.83	0.1886
[BMIM][Tf2N]	[BMIM]	[Tf2N]	352.11	17.57	0.1886
[BMIM][Tf2N]	[BMIM]	[Tf2N]	453.15	17.41	0.0847
[BMIM][Tf2N]	[BMIM]	[Tf2N]	313.58	17.24	0.2926
[BMIM][Tf2N]	[BMIM]	[Tf2N]	313.15	17.23	0.2926
[BMIM][Tf2N]	[BMIM]	[Tf2N]	449.29	17.03	0.0847
[BMIM][Tf2N]	[BMIM]	[Tf2N]	439.54	16.03	0.0847
[BMIM][Tf2N]	[BMIM]	[Tf2N]	342.42	15.52	0.1886
[BMIM][Tf2N]	[BMIM]	[Tf2N]	433.15	15.39	0.0847
[BMIM][Tf2N]	[BMIM]	[Tf2N]	429.98	15.03	0.0847
[BMIM][Tf2N]	[BMIM]	[Tf2N]	420.12	14.08	0.0847
[BMIM][Tf2N]	[BMIM]	[Tf2N]	333.15	13.63	0.1886
[BMIM][Tf2N]	[BMIM]	[Tf2N]	332.74	13.57	0.1886
[BMIM][Tf2N]	[BMIM]	[Tf2N]	413.15	13.31	0.0847
[BMIM][Tf2N]	[BMIM]	[Tf2N]	410.32	13.03	0.0847
[BMIM][Tf2N]	[BMIM]	[Tf2N]	400.58	11.98	0.0847
[BMIM][Tf2N]	[BMIM]	[Tf2N]	323.08	11.72	0.1886
[BMIM][Tf2N]	[BMIM]	[Tf2N]	393.15	11.23	0.0847
[BMIM][Tf2N]	[BMIM]	[Tf2N]	390.67	10.98	0.0847
[BMIM][Tf2N]	[BMIM]	[Tf2N]	381.17	10.03	0.0847
[BMIM][Tf2N]	[BMIM]	[Tf2N]	313.6	10.02	0.1886
[BMIM][Tf2N]	[BMIM]	[Tf2N]	313.15	9.94	0.1886
[BMIM][Tf2N]	[BMIM]	[Tf2N]	373.15	9.22	0.0847
[BMIM][Tf2N]	[BMIM]	[Tf2N]	371.5	9.03	0.0847
[BMIM][Tf2N]	[BMIM]	[Tf2N]	361.82	8.13	0.0847
[BMIM][Tf2N]	[BMIM]	[Tf2N]	353.15	7.34	0.0847
[BMIM][Tf2N]	[BMIM]	[Tf2N]	352.13	7.23	0.0847
[BMIM][Tf2N]	[BMIM]	[Tf2N]	342.43	6.48	0.0847
[BMIM][Tf2N]	[BMIM]	[Tf2N]	333.15	5.64	0.0847
[BMIM][Tf2N]	[BMIM]	[Tf2N]	332.73	5.58	0.0847
[BMIM][Tf2N]	[BMIM]	[Tf2N]	323.08	4.88	0.0847
[BMIM][Tf2N]	[BMIM]	[Tf2N]	313.55	4.22	0.0847
[BMIM][Tf2N]	[BMIM]	[Tf2N]	313.15	4.2	0.0847
[BMIM][DCA]	[BMIM]	[DCA]	313.17	467.49	0.601
[BMIM][DCA]	[BMIM]	[DCA]	303.14	398.66	0.601
[BMIM][DCA]	[BMIM]	[DCA]	293.41	326.06	0.601
[BMIM][DCA]	[BMIM]	[DCA]	363.2	295.83	0.507
[BMIM][DCA]	[BMIM]	[DCA]	353.01	257.59	0.507
[BMIM][DCA]	[BMIM]	[DCA]	343.12	217.5	0.507
[BMIM][DCA]	[BMIM]	[DCA]	333.21	175.66	0.507
[BMIM][DCA]	[BMIM]	[DCA]	322.93	131.84	0.507
[BMIM][DCA]	[BMIM]	[DCA]	363.18	131.06	0.41
[BMIM][DCA]	[BMIM]	[DCA]	353.13	111.66	0.41
[BMIM][DCA]	[BMIM]	[DCA]	343.01	94.52	0.41
[BMIM][DCA]	[BMIM]	[DCA]	313.03	88.56	0.507
[BMIM][DCA]	[BMIM]	[DCA]	363.11	77.76	0.3
[BMIM][DCA]	[BMIM]	[DCA]	333.13	77.43	0.41
[BMIM][DCA]	[BMIM]	[DCA]	353.1	67.22	0.3
[BMIM][DCA]	[BMIM]	[DCA]	323.47	63.95	0.41
[BMIM][DCA]	[BMIM]	[DCA]	302.91	60.56	0.507
[BMIM][DCA]	[BMIM]	[DCA]	343.34	57.76	0.3
[BMIM][DCA]	[BMIM]	[DCA]	313.32	50.88	0.41
[BMIM][DCA]	[BMIM]	[DCA]	333.28	48.6	0.3
[BMIM][DCA]	[BMIM]	[DCA]	293.44	44.96	0.507
[BMIM][DCA]	[BMIM]	[DCA]	363.25	43.28	0.2
[BMIM][DCA]	[BMIM]	[DCA]	323.04	40.05	0.3
[BMIM][DCA]	[BMIM]	[DCA]	303.45	39.5	0.41
[BMIM][DCA]	[BMIM]	[DCA]	353.09	37.45	0.2
[BMIM][DCA]	[BMIM]	[DCA]	313.06	32.3	0.3
[BMIM][DCA]	[BMIM]	[DCA]	343.12	31.08	0.2
[BMIM][DCA]	[BMIM]	[DCA]	293.38	30.15	0.41
[BMIM][DCA]	[BMIM]	[DCA]	332.72	26.44	0.2
[BMIM][DCA]	[BMIM]	[DCA]	303.4	25.9	0.3
[BMIM][DCA]	[BMIM]	[DCA]	322.94	22.6	0.2
[BMIM][DCA]	[BMIM]	[DCA]	293.5	19.8	0.3
[BMIM][DCA]	[BMIM]	[DCA]	313.36	17.71	0.2
[BMIM][DCA]	[BMIM]	[DCA]	303.45	13.6	0.2
[BMIM][DCA]	[BMIM]	[DCA]	293.36	10.18	0.2
[BMIM][Tf2N]	[BMIM]	[Tf2N]	323.3	499.9	0.801
[BMIM][Tf2N]	[BMIM]	[Tf2N]	363.25	460.1	0.771
[BMIM][Tf2N]	[BMIM]	[Tf2N]	313.25	447.4	0.801
[BMIM][Tf2N]	[BMIM]	[Tf2N]	353.22	420.3	0.771
[BMIM][Tf2N]	[BMIM]	[Tf2N]	303.19	393.73	0.801
[BMIM][Tf2N]	[BMIM]	[Tf2N]	343.08	380.81	0.771
[BMIM][Tf2N]	[BMIM]	[Tf2N]	363.18	363.65	0.749
[BMIM][Tf2N]	[BMIM]	[Tf2N]	333.28	336.93	0.771
[BMIM][Tf2N]	[BMIM]	[Tf2N]	293.26	332.63	0.801
[BMIM][Tf2N]	[BMIM]	[Tf2N]	353.09	332.19	0.749
[BMIM][Tf2N]	[BMIM]	[Tf2N]	343.2	292.05	0.749
[BMIM][Tf2N]	[BMIM]	[Tf2N]	323.13	289.6	0.771
[BMIM][Tf2N]	[BMIM]	[Tf2N]	333.17	251.24	0.749
[BMIM][Tf2N]	[BMIM]	[Tf2N]	313.23	239.43	0.771
[BMIM][Tf2N]	[BMIM]	[Tf2N]	362.99	224.68	0.701
[BMIM][Tf2N]	[BMIM]	[Tf2N]	323.11	205.43	0.749
[BMIM][Tf2N]	[BMIM]	[Tf2N]	353.14	194.37	0.701
[BMIM][Tf2N]	[BMIM]	[Tf2N]	303.31	187.26	0.771
[BMIM][Tf2N]	[BMIM]	[Tf2N]	343.25	161.44	0.701
[BMIM][Tf2N]	[BMIM]	[Tf2N]	313.12	158.1	0.749
[BMIM][Tf2N]	[BMIM]	[Tf2N]	333.1	131.5	0.701
[BMIM][Tf2N]	[BMIM]	[Tf2N]	293.42	128.29	0.771
[BMIM][Tf2N]	[BMIM]	[Tf2N]	363.23	117.76	0.602
[BMIM][Tf2N]	[BMIM]	[Tf2N]	303.19	108.12	0.749
[BMIM][Tf2N]	[BMIM]	[Tf2N]	323.09	102.15	0.701
[BMIM][Tf2N]	[BMIM]	[Tf2N]	353.2	101.96	0.602
[BMIM][Tf2N]	[BMIM]	[Tf2N]	343.02	86.75	0.602
[BMIM][Tf2N]	[BMIM]	[Tf2N]	313.11	78.6	0.701
[BMIM][Tf2N]	[BMIM]	[Tf2N]	363.18	73.72	0.503
[BMIM][Tf2N]	[BMIM]	[Tf2N]	333.2	72.69	0.602
[BMIM][Tf2N]	[BMIM]	[Tf2N]	353.17	64.12	0.503
[BMIM][Tf2N]	[BMIM]	[Tf2N]	323.13	60.15	0.602
[BMIM][Tf2N]	[BMIM]	[Tf2N]	293.32	59.07	0.749
[BMIM][Tf2N]	[BMIM]	[Tf2N]	303.19	58.8	0.701
[BMIM][Tf2N]	[BMIM]	[Tf2N]	343.24	54.99	0.503
[BMIM][Tf2N]	[BMIM]	[Tf2N]	363.17	51.56	0.404
[BMIM][Tf2N]	[BMIM]	[Tf2N]	313.13	49.12	0.602
[BMIM][Tf2N]	[BMIM]	[Tf2N]	333.12	46.7	0.503
[BMIM][Tf2N]	[BMIM]	[Tf2N]	353.12	45.12	0.404
[BMIM][Tf2N]	[BMIM]	[Tf2N]	293.37	44.33	0.701
[BMIM][Tf2N]	[BMIM]	[Tf2N]	303.31	39.62	0.602
[BMIM][Tf2N]	[BMIM]	[Tf2N]	323.2	39.09	0.503
[BMIM][Tf2N]	[BMIM]	[Tf2N]	343.11	38.97	0.404
[BMIM][Tf2N]	[BMIM]	[Tf2N]	363.19	35.79	0.319
[BMIM][Tf2N]	[BMIM]	[Tf2N]	333.23	33.16	0.404
[BMIM][Tf2N]	[BMIM]	[Tf2N]	313.1	31.96	0.503
[BMIM][Tf2N]	[BMIM]	[Tf2N]	353.09	31.21	0.319
[BMIM][Tf2N]	[BMIM]	[Tf2N]	293.27	30.52	0.602
[BMIM][Tf2N]	[BMIM]	[Tf2N]	323.26	27.87	0.404
[BMIM][Tf2N]	[BMIM]	[Tf2N]	342.87	26.82	0.319
[BMIM][Tf2N]	[BMIM]	[Tf2N]	303.12	25.68	0.503
[BMIM][Tf2N]	[BMIM]	[Tf2N]	363.26	24.85	0.231
[BMIM][Tf2N]	[BMIM]	[Tf2N]	333.17	22.83	0.319
[BMIM][Tf2N]	[BMIM]	[Tf2N]	313.17	22.73	0.404
[BMIM][Tf2N]	[BMIM]	[Tf2N]	353.2	21.79	0.231
[BMIM][Tf2N]	[BMIM]	[Tf2N]	293.22	19.97	0.503
[BMIM][Tf2N]	[BMIM]	[Tf2N]	323.27	18.92	0.319
[BMIM][Tf2N]	[BMIM]	[Tf2N]	343	18.74	0.231
[BMIM][Tf2N]	[BMIM]	[Tf2N]	303.1	18.12	0.404
[BMIM][Tf2N]	[BMIM]	[Tf2N]	333.19	15.74	0.231
[BMIM][Tf2N]	[BMIM]	[Tf2N]	313.19	15.4	0.319
[BMIM][Tf2N]	[BMIM]	[Tf2N]	293.53	14.1	0.404
[BMIM][Tf2N]	[BMIM]	[Tf2N]	323.22	13.03	0.231
[BMIM][Tf2N]	[BMIM]	[Tf2N]	303.05	12.23	0.319
[BMIM][Tf2N]	[BMIM]	[Tf2N]	313.32	10.5	0.231
[BMIM][Tf2N]	[BMIM]	[Tf2N]	293.21	9.15	0.319
[BMIM][Tf2N]	[BMIM]	[Tf2N]	303.18	7.86	0.231
[BMIM][Tf2N]	[BMIM]	[Tf2N]	292.65	6.29	0.231
[BMIM][MDEGSO4]	[BMIM]	[MDEGSO4]	333.36	91.2	0.494
[BMIM][MDEGSO4]	[BMIM]	[MDEGSO4]	313.31	84	0.46
[BMIM][MDEGSO4]	[BMIM]	[MDEGSO4]	333.36	78	0.406
[BMIM][MDEGSO4]	[BMIM]	[MDEGSO4]	333.36	66.9	0.35
[BMIM][MDEGSO4]	[BMIM]	[MDEGSO4]	313.31	63.9	0.345
[BMIM][MDEGSO4]	[BMIM]	[MDEGSO4]	333.36	56.5	0.308
[BMIM][MDEGSO4]	[BMIM]	[MDEGSO4]	313.31	44.1	0.206
[BMIM][MDEGSO4]	[BMIM]	[MDEGSO4]	333.36	41.4	0.216
[BMIM][MDEGSO4]	[BMIM]	[MDEGSO4]	313.31	26.5	0.121
[BMIM][MDEGSO4]	[BMIM]	[MDEGSO4]	333.36	20.9	0.0932
[BMIM][MDEGSO4]	[BMIM]	[MDEGSO4]	313.31	14.3	0.0962
[C6F9MIM][Tf2N]	[C6F9MIM]	[Tf2N]	313.22	92.3	0.853
[C6F9MIM][Tf2N]	[C6F9MIM]	[Tf2N]	333.3	90.9	0.761
[C6F9MIM][Tf2N]	[C6F9MIM]	[Tf2N]	333.3	77.2	0.699
[C6F9MIM][Tf2N]	[C6F9MIM]	[Tf2N]	313.22	70.3	0.781
[C6F9MIM][Tf2N]	[C6F9MIM]	[Tf2N]	333.3	66.9	0.668
[C6F9MIM][Tf2N]	[C6F9MIM]	[Tf2N]	333.3	56.9	0.617
[C6F9MIM][Tf2N]	[C6F9MIM]	[Tf2N]	313.22	56.6	0.735
[C6F9MIM][Tf2N]	[C6F9MIM]	[Tf2N]	298.13	51.9	0.762
[C6F9MIM][Tf2N]	[C6F9MIM]	[Tf2N]	313.22	46.4	0.668
[C6F9MIM][Tf2N]	[C6F9MIM]	[Tf2N]	333.3	42.9	0.557
[C6F9MIM][Tf2N]	[C6F9MIM]	[Tf2N]	298.13	36	0.683
[C6F9MIM][Tf2N]	[C6F9MIM]	[Tf2N]	313.22	35.6	0.627
[C6F9MIM][Tf2N]	[C6F9MIM]	[Tf2N]	333.3	32.2	0.479
[C6F9MIM][Tf2N]	[C6F9MIM]	[Tf2N]	313.22	27.1	0.562
[C6F9MIM][Tf2N]	[C6F9MIM]	[Tf2N]	298.13	25.9	0.554
[C6F9MIM][Tf2N]	[C6F9MIM]	[Tf2N]	333.3	20.4	0.377
[C6F9MIM][Tf2N]	[C6F9MIM]	[Tf2N]	313.22	17.3	0.394
[C6F9MIM][Tf2N]	[C6F9MIM]	[Tf2N]	298.13	16.9	0.473
[C6F9MIM][Tf2N]	[C6F9MIM]	[Tf2N]	298.16	13	0.337
[C6F9MIM][Tf2N]	[C6F9MIM]	[Tf2N]	298.16	13	0.337
[C6F9MIM][Tf2N]	[C6F9MIM]	[Tf2N]	333.13	13	0.22
[C6F9MIM][Tf2N]	[C6F9MIM]	[Tf2N]	333.13	13	0.22
[C6F9MIM][Tf2N]	[C6F9MIM]	[Tf2N]	298.16	12	0.319
[C6F9MIM][Tf2N]	[C6F9MIM]	[Tf2N]	333.13	12	0.208
[C6F9MIM][Tf2N]	[C6F9MIM]	[Tf2N]	298.13	11.1	0.242
[C6F9MIM][Tf2N]	[C6F9MIM]	[Tf2N]	298.16	11	0.299
[C6F9MIM][Tf2N]	[C6F9MIM]	[Tf2N]	298.16	11	0.301
[C6F9MIM][Tf2N]	[C6F9MIM]	[Tf2N]	333.13	11	0.194
[C6F9MIM][Tf2N]	[C6F9MIM]	[Tf2N]	333.13	11	0.194
[C6F9MIM][Tf2N]	[C6F9MIM]	[Tf2N]	333.3	10.1	0.24
[C6F9MIM][Tf2N]	[C6F9MIM]	[Tf2N]	298.16	10	0.279
[C6F9MIM][Tf2N]	[C6F9MIM]	[Tf2N]	333.13	9.97	0.179
[C6F9MIM][Tf2N]	[C6F9MIM]	[Tf2N]	298.16	8.5	0.245
[C6F9MIM][Tf2N]	[C6F9MIM]	[Tf2N]	333.13	8.5	0.156
[C6F9MIM][Tf2N]	[C6F9MIM]	[Tf2N]	298.16	6.99	0.21
[C6F9MIM][Tf2N]	[C6F9MIM]	[Tf2N]	333.13	6.99	0.133
[C6F9MIM][Tf2N]	[C6F9MIM]	[Tf2N]	333.13	6.01	0.113
[C6F9MIM][Tf2N]	[C6F9MIM]	[Tf2N]	298.16	6	0.188
[C6F9MIM][Tf2N]	[C6F9MIM]	[Tf2N]	298.16	5.5	0.171
[C6F9MIM][Tf2N]	[C6F9MIM]	[Tf2N]	333.13	5.49	0.106
[C6F9MIM][Tf2N]	[C6F9MIM]	[Tf2N]	333.13	4.01	0.0767
[C6F9MIM][Tf2N]	[C6F9MIM]	[Tf2N]	298.16	4	0.128
[C6F9MIM][Tf2N]	[C6F9MIM]	[Tf2N]	298.16	2.5	0.0821
[C6F9MIM][Tf2N]	[C6F9MIM]	[Tf2N]	333.13	2.49	0.0488
[C6F9MIM][Tf2N]	[C6F9MIM]	[Tf2N]	333.13	2	0.0352
[C6F9MIM][Tf2N]	[C6F9MIM]	[Tf2N]	298.16	2	0.074
[C6F9MIM][Tf2N]	[C6F9MIM]	[Tf2N]	298.16	0.999	0.0342
[C6F9MIM][Tf2N]	[C6F9MIM]	[Tf2N]	333.13	0.998	0.0215
[C6F9MIM][Tf2N]	[C6F9MIM]	[Tf2N]	298.16	0.5	0.0168
[C6F9MIM][Tf2N]	[C6F9MIM]	[Tf2N]	333.13	0.494	0.0106
[C6F9MIM][Tf2N]	[C6F9MIM]	[Tf2N]	333.13	0.206	0.000823
[C6F9MIM][Tf2N]	[C6F9MIM]	[Tf2N]	298.16	0.198	0.0117
[C6F9MIM][Tf2N]	[C6F9MIM]	[Tf2N]	298.16	0.0987	0.00354
[C6F9MIM][Tf2N]	[C6F9MIM]	[Tf2N]	333.13	0.0947	0.00195
[C6F9MIM][Tf2N]	[C6F9MIM]	[Tf2N]	298.16	0.073	0.00277
[C6F9MIM][Tf2N]	[C6F9MIM]	[Tf2N]	333.13	0.0693	0.00235
[C6F9MIM][Tf2N]	[C6F9MIM]	[Tf2N]	298.16	0.0476	0.0016
[C6F9MIM][Tf2N]	[C6F9MIM]	[Tf2N]	333.13	0.0426	0.000774
[C6F9MIM][Tf2N]	[C6F9MIM]	[Tf2N]	298.16	0.0157	0.000243
[C8F13MIM][Tf2N]	[C8F13MIM]	[Tf2N]	298.16	36.2	0.655
[C8F13MIM][Tf2N]	[C8F13MIM]	[Tf2N]	298.16	22.1	0.548
[C8F13MIM][Tf2N]	[C8F13MIM]	[Tf2N]	298.16	13.1	0.455
[C8F13MIM][Tf2N]	[C8F13MIM]	[Tf2N]	298.16	13	0.351
[C8F13MIM][Tf2N]	[C8F13MIM]	[Tf2N]	298.16	13	0.351
[C8F13MIM][Tf2N]	[C8F13MIM]	[Tf2N]	333.05	13	0.232
[C8F13MIM][Tf2N]	[C8F13MIM]	[Tf2N]	333.05	13	0.232
[truncated: 8,119 more rows]

## Sheet: Table S2
Table S2 Performance of each model with different dataset divisions and random seeds
Adaboost
Split	Seed	Train_MAE	Train_MSE	Train_R2	Test_MAE	Test_MSE	Test_R2	Total_MSE	Total_MAE	Total_R2
0.1	39	0.066223	0.006268	0.887426	0.063494	0.005928	0.89503	0.006234	0.06595	0.888223
0.2	39	0.066345	0.006268	0.887446	0.064401	0.006026	0.892454	0.00622	0.065956	0.888476
0.3	40	0.066944	0.006262	0.886419	0.065802	0.006157	0.892435	0.00623	0.066601	0.888291
0.1	40	0.067725	0.006473	0.883322	0.066639	0.006288	0.892381	0.006454	0.067616	0.884278
0.3	39	0.065659	0.006178	0.888373	0.065062	0.00611	0.892255	0.006158	0.065479	0.889585
0.2	40	0.068464	0.006621	0.880903	0.066592	0.006358	0.887443	0.006568	0.068089	0.882229
0.2	41	0.06823	0.00656	0.881769	0.067719	0.006485	0.886087	0.006545	0.068128	0.882653
0.3	41	0.067395	0.006415	0.885135	0.06715	0.006419	0.884509	0.006417	0.067322	0.88495
0.1	41	0.068163	0.006566	0.88205	0.068433	0.006601	0.883594	0.00657	0.06819	0.882207
0.2	38	0.066984	0.006339	0.887058	0.06661	0.006368	0.882837	0.006345	0.066909	0.88624
0.1	38	0.066452	0.00624	0.888339	0.068385	0.006658	0.878388	0.006281	0.066645	0.887372
0.3	38	0.069378	0.006739	0.879574	0.069362	0.006779	0.877475	0.006751	0.069373	0.878951
CatBoost
Split	Seed	Train_MAE	Train_MSE	Train_R2	Test_MAE	Test_MSE	Test_R2	Total_MSE	Total_MAE	Total_R2
0.2	39	0.005377	7.1e-05	0.998724	0.010956	0.000306	0.99454	0.000118	0.006493	0.997883
0.1	41	0.005568	7.7e-05	0.998622	0.010885	0.000316	0.994431	0.000101	0.0061	0.998196
0.1	39	0.005624	7.8e-05	0.998605	0.011131	0.000333	0.994097	0.000103	0.006175	0.998149
0.2	41	0.005466	7.4e-05	0.99866	0.010976	0.000339	0.994036	0.000127	0.006568	0.997715
0.3	41	0.005236	6.8e-05	0.998775	0.011279	0.000349	0.993715	0.000153	0.007049	0.997262
0.3	39	0.005204	6.8e-05	0.99877	0.011445	0.000362	0.993618	0.000156	0.007077	0.997199
0.1	40	0.005611	7.9e-05	0.998578	0.011487	0.00039	0.993333	0.00011	0.006199	0.998028
0.3	40	0.005136	6.8e-05	0.998768	0.012008	0.000413	0.992786	0.000171	0.007198	0.996926
0.2	40	0.005392	7.3e-05	0.99869	0.012221	0.000419	0.99258	0.000142	0.006758	0.997452
0.3	38	0.005059	6.2e-05	0.998885	0.012157	0.000421	0.992389	0.00017	0.007189	0.996951
0.1	38	0.00543	7.4e-05	0.99868	0.012124	0.000449	0.991797	0.000111	0.0061	0.998004
0.2	38	0.005315	6.9e-05	0.998768	0.012313	0.000447	0.991781	0.000145	0.006715	0.997406
GBDT
Split	Seed	Train_MAE	Train_MSE	Train_R2	Test_MAE	Test_MSE	Test_R2	Total_MSE	Total_MAE	Total_R2
0.1	39	0.005398	7.3e-05	0.998694	0.013586	0.00043	0.992384	0.000108	0.006217	0.998055
0.1	41	0.005316	7e-05	0.998735	0.013641	0.000436	0.992308	0.000107	0.006149	0.998081
0.2	39	0.005107	6.5e-05	0.99884	0.013693	0.000434	0.992261	0.000138	0.006825	0.997518
0.1	40	0.005277	6.9e-05	0.99876	0.013415	0.000467	0.99201	0.000109	0.006091	0.998053
0.2	41	0.004912	5.9e-05	0.998929	0.013395	0.000466	0.991811	0.000141	0.006609	0.997476
0.3	41	0.004588	5.2e-05	0.999064	0.014156	0.000492	0.991152	0.000184	0.007458	0.996699
0.3	39	0.00451	4.9e-05	0.999119	0.01436	0.000502	0.991142	0.000185	0.007465	0.996685
0.2	40	0.004949	6e-05	0.998913	0.013926	0.000502	0.991112	0.000149	0.006745	0.997332
0.3	40	0.004531	5.1e-05	0.999079	0.014742	0.00054	0.990558	0.000198	0.007594	0.996455
0.3	38	0.004402	4.6e-05	0.999174	0.014197	0.000531	0.990397	0.000192	0.007341	0.996562
0.2	38	0.004871	5.7e-05	0.998977	0.014169	0.000529	0.990273	0.000152	0.006732	0.99728
0.1	38	0.005204	6.6e-05	0.998812	0.014326	0.000533	0.990267	0.000113	0.006117	0.997973
LightGBM
Split	Seed	Train_MAE	Train_MSE	Train_R2	Test_MAE	Test_MSE	Test_R2	Total_MSE	Total_MAE	Total_R2
0.1	41	0.008336	0.000176	0.996845	0.013032	0.000395	0.993042	0.000198	0.008806	0.996458
0.1	39	0.008422	0.000178	0.996802	0.013173	0.0004	0.992925	0.0002	0.008898	0.99641
0.2	39	0.008256	0.000176	0.996844	0.013246	0.000399	0.992881	0.00022	0.009254	0.996048
0.2	41	0.00856	0.000184	0.996685	0.013119	0.000425	0.992535	0.000232	0.009472	0.995838
0.3	39	0.008305	0.000174	0.996859	0.013838	0.000451	0.992047	0.000257	0.009965	0.995392
0.3	41	0.008346	0.000174	0.996884	0.013864	0.000454	0.991828	0.000258	0.010002	0.995373
0.1	40	0.008362	0.000178	0.996793	0.013853	0.000482	0.99175	0.000208	0.008911	0.996265
0.2	40	0.008272	0.000174	0.996864	0.014298	0.000512	0.990938	0.000242	0.009478	0.995663
0.3	40	0.00831	0.000171	0.99689	0.014569	0.000529	0.990755	0.000279	0.010188	0.995001
0.1	38	0.008311	0.000173	0.996898	0.014203	0.000515	0.9906	0.000207	0.0089	0.99628
0.2	38	0.008246	0.00017	0.996965	0.014565	0.000552	0.989845	0.000247	0.009511	0.995577
0.3	38	0.008065	0.000157	0.997189	0.014868	0.000584	0.989445	0.000285	0.010106	0.994884
RF
Split	Seed	Train_MAE	Train_MSE	Train_R2	Test_MAE	Test_MSE	Test_R2	Total_MSE	Total_MAE	Total_R2
0.1	39	0.007937	0.000163	0.997069	0.019747	0.000949	0.983198	0.000242	0.009119	0.995665
0.2	39	0.008266	0.000179	0.996787	0.020538	0.001031	0.981603	0.000349	0.010721	0.993736
0.1	40	0.007833	0.000158	0.99716	0.02021	0.001076	0.981581	0.000249	0.009071	0.995527
0.2	40	0.008062	0.000163	0.99706	0.020712	0.001127	0.980041	0.000356	0.010593	0.993611
0.2	41	0.008109	0.000165	0.997021	0.021028	0.001148	0.97984	0.000362	0.010694	0.993512
0.3	40	0.008459	0.000178	0.99678	0.021692	0.001187	0.979259	0.00048	0.012429	0.991386
0.2	38	0.007988	0.000161	0.997128	0.021524	0.001139	0.979042	0.000357	0.010697	0.993602
0.1	38	0.007665	0.000154	0.997246	0.021841	0.001149	0.979021	0.000253	0.009083	0.995457
0.3	38	0.008304	0.000171	0.99694	0.021957	0.001168	0.978895	0.00047	0.012401	0.991569
0.3	41	0.008447	0.000179	0.996801	0.021831	0.001189	0.978606	0.000482	0.012462	0.991361
0.3	39	0.008563	0.000188	0.99661	0.021744	0.001217	0.97854	0.000496	0.012517	0.991098
0.1	41	0.007774	0.000153	0.997247	0.021299	0.001304	0.977001	0.000268	0.009127	0.995188
XGBoost
Split	Seed	Train_MAE	Train_MSE	Train_R2	Test_MAE	Test_MSE	Test_R2	Total_MSE	Total_MAE	Total_R2
0.1	39	0.005787	9.2e-05	0.998345	0.012983	0.0004	0.992915	0.000123	0.006506	0.997796
0.2	39	0.005494	8.3e-05	0.998502	0.013215	0.000423	0.992449	0.000151	0.007039	0.997286
0.1	41	0.005793	9.4e-05	0.998309	0.013179	0.000429	0.99244	0.000128	0.006532	0.997712
0.2	41	0.005552	8.8e-05	0.99842	0.013187	0.000444	0.992199	0.000159	0.007079	0.99715
0.1	40	0.005902	9.7e-05	0.998258	0.013198	0.000469	0.991968	0.000134	0.006632	0.997599
0.3	39	0.005289	8e-05	0.998549	0.013738	0.000471	0.991687	0.000198	0.007824	0.996456
0.3	40	0.005224	8.2e-05	0.998519	0.013995	0.000502	0.991231	0.000208	0.007856	0.996275
0.2	40	0.005365	8e-05	0.998562	0.013736	0.000496	0.991216	0.000163	0.00704	0.997073
0.3	41	0.005241	7.7e-05	0.998625	0.014069	0.000492	0.991152	0.000201	0.00789	0.996391
0.1	38	0.005752	9.3e-05	0.99834	0.013772	0.000515	0.990601	0.000135	0.006554	0.99758
0.3	38	0.005009	7e-05	0.998755	0.014075	0.000524	0.990526	0.000206	0.007729	0.996306
0.2	38	0.005482	8.4e-05	0.998505	0.014156	0.000541	0.990042	0.000175	0.007217	0.996855

## Sheet: Table S3
Table S3.The structure of anions and cations in ionic liquids
Abbreviation	Cation Full Name	Structure			Abbreviation	Anion Full Name	Structure
[MMIM]	1,3-dimethyl-imidazolium				[BF4]	tetrafluoroborate
[EMIM]	1-ethyl-3-methyl-imidazolium				[Cl]	chloride	Cl-
[PMIM]	1-propyl-3-methylimidazolium				[DCA]	dicyanamide
[BMIM]	1-butyl-3-methyl-imidazolium				[NO3]	nitrate
[C5MIM]	1-pentyl-3-methyl-imidazolium				[PF6]	hexafluorophosphate
[HMIM]	1-hexyl-3-methyl-imidazolium				[SCN]	thiocyanate
[C7MIM]	1-heptyl-3-methylimidazolium				[TCB]	tetracyanoborate
[OMIM]	1-octyl-3-methyl-imidazolium				[C(CN)3]	tricyanomethanide
[NMIM]	1-nonyl-3-methylimidazolium				[HSO4]	hydrogen sulfate
[DMIM]	1-decyl-3-methyl-imidazolium				[FSA]	bis(fluorosulfonyl)amide
[C12MIM]	1-dodecyl-3-methylimidazolium				[Tf2N]	bis(trifluoromethylsulfonyl)amide
[C6F9MIM]	1-(3,3,4,4,5,5,6,6,6-nonafluorohexyl)-3-methyl-imidazolium				[BETA]	bis(pentafluoroethanesulfonyl)amide
[C8F13MIM]	1-(3,3,4,4,5,5,6,6,7,7,8,8,8-tridecafluorooctyl)-3-methyl-imidazolium				[FOR]	formate
[HOC2MIM]	1-(2-hydroxyethyl)-3-methyl-imidazolium				[TFA]	trifluoroacetate
[HOC3MIM]	1-hydroxypropyl-3-methylimidazolium				[C3F7CO2]	heptafluorobutyrate
[C3OMIM]	1-(2-methoxyethyl)-3-methylimidazolium				[MeSO4]	methylsulfate
[C5O2MIM]	1-[2-(2-methoxyethoxy)ethyl]-3-methylimidazolium				[EtSO4]	ethylsulfate
[aMIM]	1-allyl-3-methylimidazolium				[MDEGSO4]	2-(2-methoxyethoxy)ethylsulfate
[oleyl-MIM]	1-(Z-octadec-9-enyl)-3-methylimidazolium				[MeSO3]	methanesulfonate
[BBIM]	1,3-dibutylimidazolium				[TfO]	trifuoromethanesulfonate
[(ETO)2IM]	1,3-diethoxyimidazolium				[NfO]	nonafluorobutylsulfonate
[BMMIM]	1-butyl-2,3-dimethylimidazolium				[TDfO]	tridecafluorohexylsulfonate
[HMMIM]	1-hexyl-2,3-dimethylimidazolium				[TOS]	p-toluenesulfonate
[C3MPYR]	1-propyl-1-methylpyrrolidinium				[C12PhSO3]	dodecylbenzenesulfonate
[BMPYR]	1-butyl-1-methyl-pyrrolidinium				[DMPO4]	dimethylphosphate
[C5MPYR]	1-pentyl-1-methylpyrrolidinium				[DEPO4]	diethylphosphate
[HMPYR]	1-hexyl-1-methylpyrrolidinium				[DBPO4]	dibutylphosphate
[C7MPYR]	1-heptyl-1-methylpyrrolidinium				[methide]	tris(trifluoromethylsulfonyl)methide
[OMPYR]	1-octyl-1-methyl-pyrrolidinium
[C9MPYR]	1-nonyl-1-methylpyrrolidinium
[COCMPYR]	1-methoxymethyl-1-methylpyrrolidinium
[C4PY]	1-butylpyridinium
[HOEPY]	1-(2-hydroxyethyl)pyridinium
[PMPY]	1-propyl-3-methylpyridinium
[C4MPY]	1-butyl-3-methylpyridinium
[HMPY]	1-hexyl-3-methylpyridinium
[PMPip]	1-propyl-1-methyl-piperidinium
[he]	2-hydroxyethylammonium
[hea]	2-(2-hydroxyethoxy)-ammonium
[thma]	tri-(2-hydroxyethyl)-methyl-ammonium
[deme]	diethylmethyl(2-methoxyethyl)-ammonium
[MDEA]	2-[2-hydroxyethyl (methyl) amino] ethanol
[m-2-HEA]	N-methyl-2-hydroxyethylammonium
[N1,1,1,2-OH]	choline
[N1,1,3,2-OH]	propylcholinium
[N1,8,8,8]	methyltrioctylammonium
[N2,1,1,3]	ethyldimethylpropylammonium
[N4,1,1,1]	trimethylbutylammonium
[N1,4,4,4]	methyl-tributylammonium
[N4,4,4,4]	tetrabutylammonium
[N6,1,1,1]	trimethyl(hexyl)ammonium
[P1,4,4,4]	triisobutyl-methyl-phosphonium
[P2,4,4,4]	ethyl(tributyl)phosphonium
[P4,4,4,4]	tetrabutylphosphonium
[P6,6,6,14]	trihexyl(tetradecyl)phosphonium
[S222]	triethylsulfonium
[AIM]	Allylimidazolium
[BVIM]	1-Butyl-3-Vinylimidazolium

## Sheet: Table S4
Table S4.Molecular feature descriptor details
FSD descriptors				CORE descriptors
No.	Feature	Explanation		No.	Feature	Explanation
1	T (K)	Temperature		1	T (K)	Temperature
2	P (bar)	Pressure		2	P (bar)	Pressure
3	[CH3]	Methyl		3	[CH3]	Methyl
4	[CnH(2n+1)]	Number of alkyl groups		4	[CnH(2n+1)]	Number of alkyl groups
5	[N_ch]	C number on alkyl group		5	[N_ch]	C number on alkyl group
6	Ncation_substituent	Cationic substituent		6	Ncation_substituent	Cationic substituent
7	[CnF(2n+1)]	Perfluoroalkyl group		7	[CnH2nOH]	Alcoholic groups
8	[N_cf]	C number on perfluoroalkyl group		8	[N_(ch)OH]	C number on alcoholic groups
9	[CnH2nOH]	Alcoholic groups		9	[Pyrrolidinum]	Pyrrole ring cation
10	[N_(ch)OH]	C number on alcoholic groups		10	[Imidazole]	Imidazole ring cation
11	[ether]	Ether group		11	[Pyridine]	Pyridine ring cation
12	[Nc_CnH(2n+1)O]	The value of the [CnH(2n+1)O] group n in the cationic branch chain		12	[C]	Central carbon anion
13	[Nc_CnH(2n+1)O2]	The value of the [CnH(2n+1)O2] group n in the cationic branch chain		13	[N(SO2)2]	Disulfide nitrogen anion
14	[Nc_CnH(2n-1)]	The value of the [CnH(2n-1)] group n in the cationic branch chain		14	[SO3]	Sulfite ion
15	[C14H29]	C14H29 group		15	[F]	The number of the [F] group in the anionic branch chain
16	[C2H5]	C2H5 group		16	[Nitrile]	The number of the [Nitrile] group in the anionic branch chain
17	[Ammonium]	Amine cation		17	Nanion_substituent	Anionic substituent
18	[Posphonium]	Phosphate cation		18	Nc_CnH(2n+1)	The value of the [CnH(2n+1)] group n in the anionic branch chain
19	[Sulfonium]	Sulfur cation		19	Nc_CnF(2n+1)	The value of the [CnF(2n+1)] group n in the anionic branch chain
20	[Pyrrolidinum]	Pyrrole ring cation
21	[Pipcridinum]	Piperidine ring cation
22	[Imidazole]	Imidazole ring cation
23	[Pyridine]	Pyridine ring cation
24	[B]	Boron anion
25	[Cl]	Chloride ion
26	[N]	Central nitrogen anion
27	[P]	Central phosphate anion
28	[S]	Central sulfur anion
29	[C]	Central carbon anion
30	[SO4]	Sulfate ion
31	[N(SO2)2]	Disulfide nitrogen anion
32	[COO]	Acetate ion
33	[SO3]	Sulfite ion
34	[PO4]	Phosphate ion
35	[F]	The number of the [F] group in the anionic branch chain
36	[Nitrile]	The number of the [Nitrile] group in the anionic branch chain
37	[O]	The number of the [O] group in the anionic branch chain
38	[H]	The number of the [H] group in the anionic branch chain
39	Nanion_substituent	Anionic substituent
40	[Benzene]	The number of the [(SO2)F3] group in the anionic branch chain
41	Nc_CnH(2n+1)	The value of the [CnH(2n+1)] group n in the anionic branch chain
42	Nc_CnF(2n+1)	The value of the [CnF(2n+1)] group n in the anionic branch chain
43	Nc_CnH(2n+1)O2	The value of the [CnH(2n+1)O2] group n in the anionic branch chain
44	N_ether	The number of the ether group o in the anionic branch chain
45	[(SO2)F3]	The number of the [(SO2)F3] group in the anionic branch chain

## Sheet: Table S5
Table S5. Model input features based on FSD descriptor
IL	cation	anion	T	P	[CH3]	[CnH(2n+1)]	[N_ch]	Ncation_substituent	[CnF(2n+1)]	[N_cf]	[CnH2nOH]	[N_(ch)OH]	[ether]	[Nc_CnH(2n+1)O]	[Nc_CnH(2n+1)O2]	[Nc_CnH(2n-1)]	[C14H29]	[C2H5]	[Ammonium]	[Posphonium]	[Sulfonium]	[Pyrrolidinum]	[Pipcridinum]	[Imidazole]	[Pyridine]	[B]	[Cl]	[N]	[P]	[S]	[C]	[SO4]	[N(SO2)2]	[COO]	[SO3]	[PO4]	[F]	[Nitrile]	[O]	[H]	Nanion_substituent	[Benzene]	Nc_CnH(2n+1)	Nc_CnF(2n+1)	Nc_CnH(2n+1)O2	N_ether	[(SO2)F3]	co2
[BMIM][BF4]	[BMIM]	[BF4]	363.15	246	1	1	4	2	0	0	0	0	0	0	0	0	0	0	0	0	0	0	0	1	0	1	0	0	0	0	0	0	0	0	0	0	1	0	0	0	4	0	0	0	0	0	0	0.61
[BMIM][BF4]	[BMIM]	[BF4]	383.15	235	1	1	4	2	0	0	0	0	0	0	0	0	0	0	0	0	0	0	0	1	0	1	0	0	0	0	0	0	0	0	0	0	1	0	0	0	4	0	0	0	0	0	0	0.5
[BMIM][BF4]	[BMIM]	[BF4]	353.15	223.3	1	1	4	2	0	0	0	0	0	0	0	0	0	0	0	0	0	0	0	1	0	1	0	0	0	0	0	0	0	0	0	0	1	0	0	0	4	0	0	0	0	0	0	0.61
[BMIM][BF4]	[BMIM]	[BF4]	373.15	198	1	1	4	2	0	0	0	0	0	0	0	0	0	0	0	0	0	0	0	1	0	1	0	0	0	0	0	0	0	0	0	0	1	0	0	0	4	0	0	0	0	0	0	0.5
[BMIM][BF4]	[BMIM]	[BF4]	343.15	188.5	1	1	4	2	0	0	0	0	0	0	0	0	0	0	0	0	0	0	0	1	0	1	0	0	0	0	0	0	0	0	0	0	1	0	0	0	4	0	0	0	0	0	0	0.61
[BMIM][BF4]	[BMIM]	[BF4]	382.95	185	1	1	4	2	0	0	0	0	0	0	0	0	0	0	0	0	0	0	0	1	0	1	0	0	0	0	0	0	0	0	0	0	1	0	0	0	4	0	0	0	0	0	0	0.458
[BMIM][BF4]	[BMIM]	[BF4]	363.15	171	1	1	4	2	0	0	0	0	0	0	0	0	0	0	0	0	0	0	0	1	0	1	0	0	0	0	0	0	0	0	0	0	1	0	0	0	4	0	0	0	0	0	0	0.5
[BMIM][BF4]	[BMIM]	[BF4]	333.15	162	1	1	4	2	0	0	0	0	0	0	0	0	0	0	0	0	0	0	0	1	0	1	0	0	0	0	0	0	0	0	0	0	1	0	0	0	4	0	0	0	0	0	0	0.61
[BMIM][BF4]	[BMIM]	[BF4]	373.15	160	1	1	4	2	0	0	0	0	0	0	0	0	0	0	0	0	0	0	0	1	0	1	0	0	0	0	0	0	0	0	0	0	1	0	0	0	4	0	0	0	0	0	0	0.458
[BMIM][BF4]	[BMIM]	[BF4]	357.15	154	1	1	4	2	0	0	0	0	0	0	0	0	0	0	0	0	0	0	0	1	0	1	0	0	0	0	0	0	0	0	0	0	1	0	0	0	4	0	0	0	0	0	0	0.5
[BMIM][BF4]	[BMIM]	[BF4]	352.05	145	1	1	4	2	0	0	0	0	0	0	0	0	0	0	0	0	0	0	0	1	0	1	0	0	0	0	0	0	0	0	0	0	1	0	0	0	4	0	0	0	0	0	0	0.5
[BMIM][BF4]	[BMIM]	[BF4]	362.85	141.5	1	1	4	2	0	0	0	0	0	0	0	0	0	0	0	0	0	0	0	1	0	1	0	0	0	0	0	0	0	0	0	0	1	0	0	0	4	0	0	0	0	0	0	0.458
[BMIM][BF4]	[BMIM]	[BF4]	323.55	141	1	1	4	2	0	0	0	0	0	0	0	0	0	0	0	0	0	0	0	1	0	1	0	0	0	0	0	0	0	0	0	0	1	0	0	0	4	0	0	0	0	0	0	0.61
[BMIM][BF4]	[BMIM]	[BF4]	343.45	125.7	1	1	4	2	0	0	0	0	0	0	0	0	0	0	0	0	0	0	0	1	0	1	0	0	0	0	0	0	0	0	0	0	1	0	0	0	4	0	0	0	0	0	0	0.5
[BMIM][BF4]	[BMIM]	[BF4]	354.25	125	1	1	4	2	0	0	0	0	0	0	0	0	0	0	0	0	0	0	0	1	0	1	0	0	0	0	0	0	0	0	0	0	1	0	0	0	4	0	0	0	0	0	0	0.458
[BMIM][BF4]	[BMIM]	[BF4]	383.15	117	1	1	4	2	0	0	0	0	0	0	0	0	0	0	0	0	0	0	0	1	0	1	0	0	0	0	0	0	0	0	0	0	1	0	0	0	4	0	0	0	0	0	0	0.35
[BMIM][BF4]	[BMIM]	[BF4]	333.35	105.9	1	1	4	2	0	0	0	0	0	0	0	0	0	0	0	0	0	0	0	1	0	1	0	0	0	0	0	0	0	0	0	0	1	0	0	0	4	0	0	0	0	0	0	0.5
[BMIM][BF4]	[BMIM]	[BF4]	313.35	105	1	1	4	2	0	0	0	0	0	0	0	0	0	0	0	0	0	0	0	1	0	1	0	0	0	0	0	0	0	0	0	0	1	0	0	0	4	0	0	0	0	0	0	0.61
[BMIM][BF4]	[BMIM]	[BF4]	343.75	104.9	1	1	4	2	0	0	0	0	0	0	0	0	0	0	0	0	0	0	0	1	0	1	0	0	0	0	0	0	0	0	0	0	1	0	0	0	4	0	0	0	0	0	0	0.458
[BMIM][BF4]	[BMIM]	[BF4]	373.15	98	1	1	4	2	0	0	0	0	0	0	0	0	0	0	0	0	0	0	0	1	0	1	0	0	0	0	0	0	0	0	0	0	1	0	0	0	4	0	0	0	0	0	0	0.35
[BMIM][BF4]	[BMIM]	[BF4]	333.95	91	1	1	4	2	0	0	0	0	0	0	0	0	0	0	0	0	0	0	0	1	0	1	0	0	0	0	0	0	0	0	0	0	1	0	0	0	4	0	0	0	0	0	0	0.458
[BMIM][BF4]	[BMIM]	[BF4]	363.15	90	1	1	4	2	0	0	0	0	0	0	0	0	0	0	0	0	0	0	0	1	0	1	0	0	0	0	0	0	0	0	0	0	1	0	0	0	4	0	0	0	0	0	0	0.35
[BMIM][BF4]	[BMIM]	[BF4]	324.15	89.7	1	1	4	2	0	0	0	0	0	0	0	0	0	0	0	0	0	0	0	1	0	1	0	0	0	0	0	0	0	0	0	0	1	0	0	0	4	0	0	0	0	0	0	0.5
[BMIM][BF4]	[BMIM]	[BF4]	303.15	81	1	1	4	2	0	0	0	0	0	0	0	0	0	0	0	0	0	0	0	1	0	1	0	0	0	0	0	0	0	0	0	0	1	0	0	0	4	0	0	0	0	0	0	0.61
[BMIM][BF4]	[BMIM]	[BF4]	383.15	80.5	1	1	4	2	0	0	0	0	0	0	0	0	0	0	0	0	0	0	0	1	0	1	0	0	0	0	0	0	0	0	0	0	1	0	0	0	4	0	0	0	0	0	0	0.266
[BMIM][BF4]	[BMIM]	[BF4]	352.25	79.1	1	1	4	2	0	0	0	0	0	0	0	0	0	0	0	0	0	0	0	1	0	1	0	0	0	0	0	0	0	0	0	0	1	0	0	0	4	0	0	0	0	0	0	0.35
[BMIM][BF4]	[BMIM]	[BF4]	322.95	75.3	1	1	4	2	0	0	0	0	0	0	0	0	0	0	0	0	0	0	0	1	0	1	0	0	0	0	0	0	0	0	0	0	1	0	0	0	4	0	0	0	0	0	0	0.458
[BMIM][BF4]	[BMIM]	[BF4]	313.85	74.3	1	1	4	2	0	0	0	0	0	0	0	0	0	0	0	0	0	0	0	1	0	1	0	0	0	0	0	0	0	0	0	0	1	0	0	0	4	0	0	0	0	0	0	0.5
[BMIM][BF4]	[BMIM]	[BF4]	293.25	73	1	1	4	2	0	0	0	0	0	0	0	0	0	0	0	0	0	0	0	1	0	1	0	0	0	0	0	0	0	0	0	0	1	0	0	0	4	0	0	0	0	0	0	0.61
[BMIM][BF4]	[BMIM]	[BF4]	373.45	71.5	1	1	4	2	0	0	0	0	0	0	0	0	0	0	0	0	0	0	0	1	0	1	0	0	0	0	0	0	0	0	0	0	1	0	0	0	4	0	0	0	0	0	0	0.266
[BMIM][BF4]	[BMIM]	[BF4]	342.75	64.3	1	1	4	2	0	0	0	0	0	0	0	0	0	0	0	0	0	0	0	1	0	1	0	0	0	0	0	0	0	0	0	0	1	0	0	0	4	0	0	0	0	0	0	0.35
[BMIM][BF4]	[BMIM]	[BF4]	314.05	63.5	1	1	4	2	0	0	0	0	0	0	0	0	0	0	0	0	0	0	0	1	0	1	0	0	0	0	0	0	0	0	0	0	1	0	0	0	4	0	0	0	0	0	0	0.458
[BMIM][BF4]	[BMIM]	[BF4]	362.95	62.1	1	1	4	2	0	0	0	0	0	0	0	0	0	0	0	0	0	0	0	1	0	1	0	0	0	0	0	0	0	0	0	0	1	0	0	0	4	0	0	0	0	0	0	0.266
[BMIM][BF4]	[BMIM]	[BF4]	303.85	59.8	1	1	4	2	0	0	0	0	0	0	0	0	0	0	0	0	0	0	0	1	0	1	0	0	0	0	0	0	0	0	0	0	1	0	0	0	4	0	0	0	0	0	0	0.5
[BMIM][BF4]	[BMIM]	[BF4]	332.85	56.1	1	1	4	2	0	0	0	0	0	0	0	0	0	0	0	0	0	0	0	1	0	1	0	0	0	0	0	0	0	0	0	0	1	0	0	0	4	0	0	0	0	0	0	0.35
[BMIM][BF4]	[BMIM]	[BF4]	353.15	54.2	1	1	4	2	0	0	0	0	0	0	0	0	0	0	0	0	0	0	0	1	0	1	0	0	0	0	0	0	0	0	0	0	1	0	0	0	4	0	0	0	0	0	0	0.266
[BMIM][BF4]	[BMIM]	[BF4]	303.15	49.3	1	1	4	2	0	0	0	0	0	0	0	0	0	0	0	0	0	0	0	1	0	1	0	0	0	0	0	0	0	0	0	0	1	0	0	0	4	0	0	0	0	0	0	0.458
[BMIM][BF4]	[BMIM]	[BF4]	293.15	47.2	1	1	4	2	0	0	0	0	0	0	0	0	0	0	0	0	0	0	0	1	0	1	0	0	0	0	0	0	0	0	0	0	1	0	0	0	4	0	0	0	0	0	0	0.5
[BMIM][BF4]	[BMIM]	[BF4]	322.65	47.2	1	1	4	2	0	0	0	0	0	0	0	0	0	0	0	0	0	0	0	1	0	1	0	0	0	0	0	0	0	0	0	0	1	0	0	0	4	0	0	0	0	0	0	0.35
[BMIM][BF4]	[BMIM]	[BF4]	343.15	46.9	1	1	4	2	0	0	0	0	0	0	0	0	0	0	0	0	0	0	0	1	0	1	0	0	0	0	0	0	0	0	0	0	1	0	0	0	4	0	0	0	0	0	0	0.266
[BMIM][BF4]	[BMIM]	[BF4]	293.65	41	1	1	4	2	0	0	0	0	0	0	0	0	0	0	0	0	0	0	0	1	0	1	0	0	0	0	0	0	0	0	0	0	1	0	0	0	4	0	0	0	0	0	0	0.458
[BMIM][BF4]	[BMIM]	[BF4]	333.05	40	1	1	4	2	0	0	0	0	0	0	0	0	0	0	0	0	0	0	0	1	0	1	0	0	0	0	0	0	0	0	0	0	1	0	0	0	4	0	0	0	0	0	0	0.266
[BMIM][BF4]	[BMIM]	[BF4]	313.45	38.9	1	1	4	2	0	0	0	0	0	0	0	0	0	0	0	0	0	0	0	1	0	1	0	0	0	0	0	0	0	0	0	0	1	0	0	0	4	0	0	0	0	0	0	0.35
[BMIM][BF4]	[BMIM]	[BF4]	383.15	38	1	1	4	2	0	0	0	0	0	0	0	0	0	0	0	0	0	0	0	1	0	1	0	0	0	0	0	0	0	0	0	0	1	0	0	0	4	0	0	0	0	0	0	0.141
[BMIM][BF4]	[BMIM]	[BF4]	323.05	34	1	1	4	2	0	0	0	0	0	0	0	0	0	0	0	0	0	0	0	1	0	1	0	0	0	0	0	0	0	0	0	0	1	0	0	0	4	0	0	0	0	0	0	0.266
[BMIM][BF4]	[BMIM]	[BF4]	303.75	32	1	1	4	2	0	0	0	0	0	0	0	0	0	0	0	0	0	0	0	1	0	1	0	0	0	0	0	0	0	0	0	0	1	0	0	0	4	0	0	0	0	0	0	0.35
[BMIM][BF4]	[BMIM]	[BF4]	373.15	30.3	1	1	4	2	0	0	0	0	0	0	0	0	0	0	0	0	0	0	0	1	0	1	0	0	0	0	0	0	0	0	0	0	1	0	0	0	4	0	0	0	0	0	0	0.141
[BMIM][BF4]	[BMIM]	[BF4]	313.25	28.2	1	1	4	2	0	0	0	0	0	0	0	0	0	0	0	0	0	0	0	1	0	1	0	0	0	0	0	0	0	0	0	0	1	0	0	0	4	0	0	0	0	0	0	0.266
[BMIM][BF4]	[BMIM]	[BF4]	363.15	27.2	1	1	4	2	0	0	0	0	0	0	0	0	0	0	0	0	0	0	0	1	0	1	0	0	0	0	0	0	0	0	0	0	1	0	0	0	4	0	0	0	0	0	0	0.141
[BMIM][BF4]	[BMIM]	[BF4]	293.45	25.2	1	1	4	2	0	0	0	0	0	0	0	0	0	0	0	0	0	0	0	1	0	1	0	0	0	0	0	0	0	0	0	0	1	0	0	0	4	0	0	0	0	0	0	0.35
[BMIM][BF4]	[BMIM]	[BF4]	353.25	24.1	1	1	4	2	0	0	0	0	0	0	0	0	0	0	0	0	0	0	0	1	0	1	0	0	0	0	0	0	0	0	0	0	1	0	0	0	4	0	0	0	0	0	0	0.141
[BMIM][BF4]	[BMIM]	[BF4]	303.45	23.3	1	1	4	2	0	0	0	0	0	0	0	0	0	0	0	0	0	0	0	1	0	1	0	0	0	0	0	0	0	0	0	0	1	0	0	0	4	0	0	0	0	0	0	0.266
[BMIM][BF4]	[BMIM]	[BF4]	343.15	20.3	1	1	4	2	0	0	0	0	0	0	0	0	0	0	0	0	0	0	0	1	0	1	0	0	0	0	0	0	0	0	0	0	1	0	0	0	4	0	0	0	0	0	0	0.141
[BMIM][BF4]	[BMIM]	[BF4]	293.75	19	1	1	4	2	0	0	0	0	0	0	0	0	0	0	0	0	0	0	0	1	0	1	0	0	0	0	0	0	0	0	0	0	1	0	0	0	4	0	0	0	0	0	0	0.266
[BMIM][BF4]	[BMIM]	[BF4]	333.15	17.8	1	1	4	2	0	0	0	0	0	0	0	0	0	0	0	0	0	0	0	1	0	1	0	0	0	0	0	0	0	0	0	0	1	0	0	0	4	0	0	0	0	0	0	0.141
[BMIM][BF4]	[BMIM]	[BF4]	323.15	15.8	1	1	4	2	0	0	0	0	0	0	0	0	0	0	0	0	0	0	0	1	0	1	0	0	0	0	0	0	0	0	0	0	1	0	0	0	4	0	0	0	0	0	0	0.141
[BMIM][BF4]	[BMIM]	[BF4]	313.25	13.9	1	1	4	2	0	0	0	0	0	0	0	0	0	0	0	0	0	0	0	1	0	1	0	0	0	0	0	0	0	0	0	0	1	0	0	0	4	0	0	0	0	0	0	0.141
[BMIM][BF4]	[BMIM]	[BF4]	303.35	12	1	1	4	2	0	0	0	0	0	0	0	0	0	0	0	0	0	0	0	1	0	1	0	0	0	0	0	0	0	0	0	0	1	0	0	0	4	0	0	0	0	0	0	0.141
[BMIM][BF4]	[BMIM]	[BF4]	293.25	10.5	1	1	4	2	0	0	0	0	0	0	0	0	0	0	0	0	0	0	0	1	0	1	0	0	0	0	0	0	0	0	0	0	1	0	0	0	4	0	0	0	0	0	0	0.141
[BMIM][SCN]	[BMIM]	[SCN]	373.15	315	1	1	4	2	0	0	0	0	0	0	0	0	0	0	0	0	0	0	0	1	0	0	0	0	0	1	0	0	0	0	0	0	0	1	0	0	1	0	0	0	0	0	0	0.43
[BMIM][SCN]	[BMIM]	[SCN]	361.45	275	1	1	4	2	0	0	0	0	0	0	0	0	0	0	0	0	0	0	0	1	0	0	0	0	0	1	0	0	0	0	0	0	0	1	0	0	1	0	0	0	0	0	0	0.43
[BMIM][SCN]	[BMIM]	[SCN]	353.15	242	1	1	4	2	0	0	0	0	0	0	0	0	0	0	0	0	0	0	0	1	0	0	0	0	0	1	0	0	0	0	0	0	0	1	0	0	1	0	0	0	0	0	0	0.43
[BMIM][SCN]	[BMIM]	[SCN]	344.15	205	1	1	4	2	0	0	0	0	0	0	0	0	0	0	0	0	0	0	0	1	0	0	0	0	0	1	0	0	0	0	0	0	0	1	0	0	1	0	0	0	0	0	0	0.43
[BMIM][SCN]	[BMIM]	[SCN]	333.15	167	1	1	4	2	0	0	0	0	0	0	0	0	0	0	0	0	0	0	0	1	0	0	0	0	0	1	0	0	0	0	0	0	0	1	0	0	1	0	0	0	0	0	0	0.43
[BMIM][SCN]	[BMIM]	[SCN]	323.15	128	1	1	4	2	0	0	0	0	0	0	0	0	0	0	0	0	0	0	0	1	0	0	0	0	0	1	0	0	0	0	0	0	0	1	0	0	1	0	0	0	0	0	0	0.43
[BMIM][SCN]	[BMIM]	[SCN]	384.15	121.1	1	1	4	2	0	0	0	0	0	0	0	0	0	0	0	0	0	0	0	1	0	0	0	0	0	1	0	0	0	0	0	0	0	1	0	0	1	0	0	0	0	0	0	0.337
[BMIM][SCN]	[BMIM]	[SCN]	373.15	106.7	1	1	4	2	0	0	0	0	0	0	0	0	0	0	0	0	0	0	0	1	0	0	0	0	0	1	0	0	0	0	0	0	0	1	0	0	1	0	0	0	0	0	0	0.337
[BMIM][SCN]	[BMIM]	[SCN]	383.15	104	1	1	4	2	0	0	0	0	0	0	0	0	0	0	0	0	0	0	0	1	0	0	0	0	0	1	0	0	0	0	0	0	0	1	0	0	1	0	0	0	0	0	0	0.296
[BMIM][SCN]	[BMIM]	[SCN]	313.65	99	1	1	4	2	0	0	0	0	0	0	0	0	0	0	0	0	0	0	0	1	0	0	0	0	0	1	0	0	0	0	0	0	0	1	0	0	1	0	0	0	0	0	0	0.43
[BMIM][SCN]	[BMIM]	[SCN]	361.45	96.7	1	1	4	2	0	0	0	0	0	0	0	0	0	0	0	0	0	0	0	1	0	0	0	0	0	1	0	0	0	0	0	0	0	1	0	0	1	0	0	0	0	0	0	0.337
[BMIM][SCN]	[BMIM]	[SCN]	372.55	96	1	1	4	2	0	0	0	0	0	0	0	0	0	0	0	0	0	0	0	1	0	0	0	0	0	1	0	0	0	0	0	0	0	1	0	0	1	0	0	0	0	0	0	0.296
[BMIM][SCN]	[BMIM]	[SCN]	362.45	88	1	1	4	2	0	0	0	0	0	0	0	0	0	0	0	0	0	0	0	1	0	0	0	0	0	1	0	0	0	0	0	0	0	1	0	0	1	0	0	0	0	0	0	0.296
[BMIM][SCN]	[BMIM]	[SCN]	353.15	88	1	1	4	2	0	0	0	0	0	0	0	0	0	0	0	0	0	0	0	1	0	0	0	0	0	1	0	0	0	0	0	0	0	1	0	0	1	0	0	0	0	0	0	0.337
[BMIM][SCN]	[BMIM]	[SCN]	344.15	80	1	1	4	2	0	0	0	0	0	0	0	0	0	0	0	0	0	0	0	1	0	0	0	0	0	1	0	0	0	0	0	0	0	1	0	0	1	0	0	0	0	0	0	0.337
[BMIM][SCN]	[BMIM]	[SCN]	381.95	79.8	1	1	4	2	0	0	0	0	0	0	0	0	0	0	0	0	0	0	0	1	0	0	0	0	0	1	0	0	0	0	0	0	0	1	0	0	1	0	0	0	0	0	0	0.254
[BMIM][SCN]	[BMIM]	[SCN]	353.15	78	1	1	4	2	0	0	0	0	0	0	0	0	0	0	0	0	0	0	0	1	0	0	0	0	0	1	0	0	0	0	0	0	0	1	0	0	1	0	0	0	0	0	0	0.296
[BMIM][SCN]	[BMIM]	[SCN]	373.15	74	1	1	4	2	0	0	0	0	0	0	0	0	0	0	0	0	0	0	0	1	0	0	0	0	0	1	0	0	0	0	0	0	0	1	0	0	1	0	0	0	0	0	0	0.254
[BMIM][SCN]	[BMIM]	[SCN]	332.95	73	1	1	4	2	0	0	0	0	0	0	0	0	0	0	0	0	0	0	0	1	0	0	0	0	0	1	0	0	0	0	0	0	0	1	0	0	1	0	0	0	0	0	0	0.337
[BMIM][SCN]	[BMIM]	[SCN]	343.45	71	1	1	4	2	0	0	0	0	0	0	0	0	0	0	0	0	0	0	0	1	0	0	0	0	0	1	0	0	0	0	0	0	0	1	0	0	1	0	0	0	0	0	0	0.296
[BMIM][SCN]	[BMIM]	[SCN]	363.15	68.5	1	1	4	2	0	0	0	0	0	0	0	0	0	0	0	0	0	0	0	1	0	0	0	0	0	1	0	0	0	0	0	0	0	1	0	0	1	0	0	0	0	0	0	0.254
[BMIM][SCN]	[BMIM]	[SCN]	322.75	65	1	1	4	2	0	0	0	0	0	0	0	0	0	0	0	0	0	0	0	1	0	0	0	0	0	1	0	0	0	0	0	0	0	1	0	0	1	0	0	0	0	0	0	0.337
[BMIM][SCN]	[BMIM]	[SCN]	333.55	64	1	1	4	2	0	0	0	0	0	0	0	0	0	0	0	0	0	0	0	1	0	0	0	0	0	1	0	0	0	0	0	0	0	1	0	0	1	0	0	0	0	0	0	0.296
[BMIM][SCN]	[BMIM]	[SCN]	352.95	62	1	1	4	2	0	0	0	0	0	0	0	0	0	0	0	0	0	0	0	1	0	0	0	0	0	1	0	0	0	0	0	0	0	1	0	0	1	0	0	0	0	0	0	0.254
[BMIM][SCN]	[BMIM]	[SCN]	382.65	61.7	1	1	4	2	0	0	0	0	0	0	0	0	0	0	0	0	0	0	0	1	0	0	0	0	0	1	0	0	0	0	0	0	0	1	0	0	1	0	0	0	0	0	0	0.199
[BMIM][SCN]	[BMIM]	[SCN]	312.75	59	1	1	4	2	0	0	0	0	0	0	0	0	0	0	0	0	0	0	0	1	0	0	0	0	0	1	0	0	0	0	0	0	0	1	0	0	1	0	0	0	0	0	0	0.337
[BMIM][SCN]	[BMIM]	[SCN]	323.65	58	1	1	4	2	0	0	0	0	0	0	0	0	0	0	0	0	0	0	0	1	0	0	0	0	0	1	0	0	0	0	0	0	0	1	0	0	1	0	0	0	0	0	0	0.296
[BMIM][SCN]	[BMIM]	[SCN]	343.75	56.1	1	1	4	2	0	0	0	0	0	0	0	0	0	0	0	0	0	0	0	1	0	0	0	0	0	1	0	0	0	0	0	0	0	1	0	0	1	0	0	0	0	0	0	0.254
[BMIM][SCN]	[BMIM]	[SCN]	373.35	56	1	1	4	2	0	0	0	0	0	0	0	0	0	0	0	0	0	0	0	1	0	0	0	0	0	1	0	0	0	0	0	0	0	1	0	0	1	0	0	0	0	0	0	0.199
[BMIM][SCN]	[BMIM]	[SCN]	302.95	55	1	1	4	2	0	0	0	0	0	0	0	0	0	0	0	0	0	0	0	1	0	0	0	0	0	1	0	0	0	0	0	0	0	1	0	0	1	0	0	0	0	0	0	0.337
[BMIM][SCN]	[BMIM]	[SCN]	313.15	52.5	1	1	4	2	0	0	0	0	0	0	0	0	0	0	0	0	0	0	0	1	0	0	0	0	0	1	0	0	0	0	0	0	0	1	0	0	1	0	0	0	0	0	0	0.296
[BMIM][SCN]	[BMIM]	[SCN]	363.15	49.9	1	1	4	2	0	0	0	0	0	0	0	0	0	0	0	0	0	0	0	1	0	0	0	0	0	1	0	0	0	0	0	0	0	1	0	0	1	0	0	0	0	0	0	0.199
[BMIM][SCN]	[BMIM]	[SCN]	333.65	49.5	1	1	4	2	0	0	0	0	0	0	0	0	0	0	0	0	0	0	0	1	0	0	0	0	0	1	0	0	0	0	0	0	0	1	0	0	1	0	0	0	0	0	0	0.254
[BMIM][SCN]	[BMIM]	[SCN]	303.35	48	1	1	4	2	0	0	0	0	0	0	0	0	0	0	0	0	0	0	0	1	0	0	0	0	0	1	0	0	0	0	0	0	0	1	0	0	1	0	0	0	0	0	0	0.296
[BMIM][SCN]	[BMIM]	[SCN]	381.75	44.6	1	1	4	2	0	0	0	0	0	0	0	0	0	0	0	0	0	0	0	1	0	0	0	0	0	1	0	0	0	0	0	0	0	1	0	0	1	0	0	0	0	0	0	0.126
[BMIM][SCN]	[BMIM]	[SCN]	352.85	44.5	1	1	4	2	0	0	0	0	0	0	0	0	0	0	0	0	0	0	0	1	0	0	0	0	0	1	0	0	0	0	0	0	0	1	0	0	1	0	0	0	0	0	0	0.199
[BMIM][SCN]	[BMIM]	[SCN]	324.65	43.8	1	1	4	2	0	0	0	0	0	0	0	0	0	0	0	0	0	0	0	1	0	0	0	0	0	1	0	0	0	0	0	0	0	1	0	0	1	0	0	0	0	0	0	0.254
[BMIM][SCN]	[BMIM]	[SCN]	293.35	43.5	1	1	4	2	0	0	0	0	0	0	0	0	0	0	0	0	0	0	0	1	0	0	0	0	0	1	0	0	0	0	0	0	0	1	0	0	1	0	0	0	0	0	0	0.296
[BMIM][SCN]	[BMIM]	[SCN]	372.95	40.8	1	1	4	2	0	0	0	0	0	0	0	0	0	0	0	0	0	0	0	1	0	0	0	0	0	1	0	0	0	0	0	0	0	1	0	0	1	0	0	0	0	0	0	0.126
[BMIM][SCN]	[BMIM]	[SCN]	342.55	39.9	1	1	4	2	0	0	0	0	0	0	0	0	0	0	0	0	0	0	0	1	0	0	0	0	0	1	0	0	0	0	0	0	0	1	0	0	1	0	0	0	0	0	0	0.199
[BMIM][SCN]	[BMIM]	[SCN]	312.45	37	1	1	4	2	0	0	0	0	0	0	0	0	0	0	0	0	0	0	0	1	0	0	0	0	0	1	0	0	0	0	0	0	0	1	0	0	1	0	0	0	0	0	0	0.254
[BMIM][SCN]	[BMIM]	[SCN]	333.15	36.1	1	1	4	2	0	0	0	0	0	0	0	0	0	0	0	0	0	0	0	1	0	0	0	0	0	1	0	0	0	0	0	0	0	1	0	0	1	0	0	0	0	0	0	0.199
[BMIM][SCN]	[BMIM]	[SCN]	363.35	35.5	1	1	4	2	0	0	0	0	0	0	0	0	0	0	0	0	0	0	0	1	0	0	0	0	0	1	0	0	0	0	0	0	0	1	0	0	1	0	0	0	0	0	0	0.126
[BMIM][SCN]	[BMIM]	[SCN]	302.55	32.5	1	1	4	2	0	0	0	0	0	0	0	0	0	0	0	0	0	0	0	1	0	0	0	0	0	1	0	0	0	0	0	0	0	1	0	0	1	0	0	0	0	0	0	0.254
[BMIM][SCN]	[BMIM]	[SCN]	323.15	32	1	1	4	2	0	0	0	0	0	0	0	0	0	0	0	0	0	0	0	1	0	0	0	0	0	1	0	0	0	0	0	0	0	1	0	0	1	0	0	0	0	0	0	0.199
[BMIM][SCN]	[BMIM]	[SCN]	353.55	30.5	1	1	4	2	0	0	0	0	0	0	0	0	0	0	0	0	0	0	0	1	0	0	0	0	0	1	0	0	0	0	0	0	0	1	0	0	1	0	0	0	0	0	0	0.126
[BMIM][SCN]	[BMIM]	[SCN]	312.75	28.6	1	1	4	2	0	0	0	0	0	0	0	0	0	0	0	0	0	0	0	1	0	0	0	0	0	1	0	0	0	0	0	0	0	1	0	0	1	0	0	0	0	0	0	0.199
[BMIM][SCN]	[BMIM]	[SCN]	293.05	28.5	1	1	4	2	0	0	0	0	0	0	0	0	0	0	0	0	0	0	0	1	0	0	0	0	0	1	0	0	0	0	0	0	0	1	0	0	1	0	0	0	0	0	0	0.254
[BMIM][SCN]	[BMIM]	[SCN]	343.55	26.8	1	1	4	2	0	0	0	0	0	0	0	0	0	0	0	0	0	0	0	1	0	0	0	0	0	1	0	0	0	0	0	0	0	1	0	0	1	0	0	0	0	0	0	0.126
[BMIM][SCN]	[BMIM]	[SCN]	303.15	24.5	1	1	4	2	0	0	0	0	0	0	0	0	0	0	0	0	0	0	0	1	0	0	0	0	0	1	0	0	0	0	0	0	0	1	0	0	1	0	0	0	0	0	0	0.199
[BMIM][SCN]	[BMIM]	[SCN]	333.75	23.1	1	1	4	2	0	0	0	0	0	0	0	0	0	0	0	0	0	0	0	1	0	0	0	0	0	1	0	0	0	0	0	0	0	1	0	0	1	0	0	0	0	0	0	0.126
[BMIM][SCN]	[BMIM]	[SCN]	293.65	20	1	1	4	2	0	0	0	0	0	0	0	0	0	0	0	0	0	0	0	1	0	0	0	0	0	1	0	0	0	0	0	0	0	1	0	0	1	0	0	0	0	0	0	0.199
[BMIM][SCN]	[BMIM]	[SCN]	323.15	19.2	1	1	4	2	0	0	0	0	0	0	0	0	0	0	0	0	0	0	0	1	0	0	0	0	0	1	0	0	0	0	0	0	0	1	0	0	1	0	0	0	0	0	0	0.126
[BMIM][SCN]	[BMIM]	[SCN]	312.95	16	1	1	4	2	0	0	0	0	0	0	0	0	0	0	0	0	0	0	0	1	0	0	0	0	0	1	0	0	0	0	0	0	0	1	0	0	1	0	0	0	0	0	0	0.126
[BMIM][SCN]	[BMIM]	[SCN]	303.25	13.1	1	1	4	2	0	0	0	0	0	0	0	0	0	0	0	0	0	0	0	1	0	0	0	0	0	1	0	0	0	0	0	0	0	1	0	0	1	0	0	0	0	0	0	0.126
[BMIM][SCN]	[BMIM]	[SCN]	292.35	10.5	1	1	4	2	0	0	0	0	0	0	0	0	0	0	0	0	0	0	0	1	0	0	0	0	0	1	0	0	0	0	0	0	0	1	0	0	1	0	0	0	0	0	0	0.126
[(ETO)2IM][Tf2N]	[(ETO)2IM]	[Tf2N]	322.15	328.6	0	2	2	2	0	0	0	0	2	0	0	0	0	0	0	0	0	0	0	1	0	0	0	0	0	0	0	0	1	0	0	0	0	0	0	0	2	0	0	1	0	0	0	0.812
[(ETO)2IM][Tf2N]	[(ETO)2IM]	[Tf2N]	343.55	312.4	0	2	2	2	0	0	0	0	2	0	0	0	0	0	0	0	0	0	0	1	0	0	0	0	0	0	0	0	1	0	0	0	0	0	0	0	2	0	0	1	0	0	0	0.778
[(ETO)2IM][Tf2N]	[(ETO)2IM]	[Tf2N]	313.05	282.6	0	2	2	2	0	0	0	0	2	0	0	0	0	0	0	0	0	0	0	1	0	0	0	0	0	0	0	0	1	0	0	0	0	0	0	0	2	0	0	1	0	0	0	0.812
[(ETO)2IM][Tf2N]	[(ETO)2IM]	[Tf2N]	333.85	271.6	0	2	2	2	0	0	0	0	2	0	0	0	0	0	0	0	0	0	0	1	0	0	0	0	0	0	0	0	1	0	0	0	0	0	0	0	2	0	0	1	0	0	0	0.778
[(ETO)2IM][Tf2N]	[(ETO)2IM]	[Tf2N]	362.85	224.2	0	2	2	2	0	0	0	0	2	0	0	0	0	0	0	0	0	0	0	1	0	0	0	0	0	0	0	0	1	0	0	0	0	0	0	0	2	0	0	1	0	0	0	0.712
[(ETO)2IM][Tf2N]	[(ETO)2IM]	[Tf2N]	323.85	223.3	0	2	2	2	0	0	0	0	2	0	0	0	0	0	0	0	0	0	0	1	0	0	0	0	0	0	0	0	1	0	0	0	0	0	0	0	2	0	0	1	0	0	0	0.778
[(ETO)2IM][Tf2N]	[(ETO)2IM]	[Tf2N]	303.15	213.4	0	2	2	2	0	0	0	0	2	0	0	0	0	0	0	0	0	0	0	1	0	0	0	0	0	0	0	0	1	0	0	0	0	0	0	0	2	0	0	1	0	0	0	0.812
[(ETO)2IM][Tf2N]	[(ETO)2IM]	[Tf2N]	352.85	193.3	0	2	2	2	0	0	0	0	2	0	0	0	0	0	0	0	0	0	0	1	0	0	0	0	0	0	0	0	1	0	0	0	0	0	0	0	2	0	0	1	0	0	0	0.712
[(ETO)2IM][Tf2N]	[(ETO)2IM]	[Tf2N]	312.95	166.6	0	2	2	2	0	0	0	0	2	0	0	0	0	0	0	0	0	0	0	1	0	0	0	0	0	0	0	0	1	0	0	0	0	0	0	0	2	0	0	1	0	0	0	0.778
[(ETO)2IM][Tf2N]	[(ETO)2IM]	[Tf2N]	343.25	163.2	0	2	2	2	0	0	0	0	2	0	0	0	0	0	0	0	0	0	0	1	0	0	0	0	0	0	0	0	1	0	0	0	0	0	0	0	2	0	0	1	0	0	0	0.712
[(ETO)2IM][Tf2N]	[(ETO)2IM]	[Tf2N]	362.95	132.4	0	2	2	2	0	0	0	0	2	0	0	0	0	0	0	0	0	0	0	1	0	0	0	0	0	0	0	0	1	0	0	0	0	0	0	0	2	0	0	1	0	0	0	0.626
[(ETO)2IM][Tf2N]	[(ETO)2IM]	[Tf2N]	333.55	131.7	0	2	2	2	0	0	0	0	2	0	0	0	0	0	0	0	0	0	0	1	0	0	0	0	0	0	0	0	1	0	0	0	0	0	0	0	2	0	0	1	0	0	0	0.712
[(ETO)2IM][Tf2N]	[(ETO)2IM]	[Tf2N]	353.25	115.1	0	2	2	2	0	0	0	0	2	0	0	0	0	0	0	0	0	0	0	1	0	0	0	0	0	0	0	0	1	0	0	0	0	0	0	0	2	0	0	1	0	0	0	0.626
[(ETO)2IM][Tf2N]	[(ETO)2IM]	[Tf2N]	302.95	107.8	0	2	2	2	0	0	0	0	2	0	0	0	0	0	0	0	0	0	0	1	0	0	0	0	0	0	0	0	1	0	0	0	0	0	0	0	2	0	0	1	0	0	0	0.778
[(ETO)2IM][Tf2N]	[(ETO)2IM]	[Tf2N]	323.95	103.4	0	2	2	2	0	0	0	0	2	0	0	0	0	0	0	0	0	0	0	1	0	0	0	0	0	0	0	0	1	0	0	0	0	0	0	0	2	0	0	1	0	0	0	0.712
[(ETO)2IM][Tf2N]	[(ETO)2IM]	[Tf2N]	343.85	99.8	0	2	2	2	0	0	0	0	2	0	0	0	0	0	0	0	0	0	0	1	0	0	0	0	0	0	0	0	1	0	0	0	0	0	0	0	2	0	0	1	0	0	0	0.626
[(ETO)2IM][Tf2N]	[(ETO)2IM]	[Tf2N]	363.05	97.7	0	2	2	2	0	0	0	0	2	0	0	0	0	0	0	0	0	0	0	1	0	0	0	0	0	0	0	0	1	0	0	0	0	0	0	0	2	0	0	1	0	0	0	0.554
[(ETO)2IM][Tf2N]	[(ETO)2IM]	[Tf2N]	353.25	85.9	0	2	2	2	0	0	0	0	2	0	0	0	0	0	0	0	0	0	0	1	0	0	0	0	0	0	0	0	1	0	0	0	0	0	0	0	2	0	0	1	0	0	0	0.554
[(ETO)2IM][Tf2N]	[(ETO)2IM]	[Tf2N]	333.85	84.5	0	2	2	2	0	0	0	0	2	0	0	0	0	0	0	0	0	0	0	1	0	0	0	0	0	0	0	0	1	0	0	0	0	0	0	0	2	0	0	1	0	0	0	0.626
[(ETO)2IM][Tf2N]	[(ETO)2IM]	[Tf2N]	313.25	79	0	2	2	2	0	0	0	0	2	0	0	0	0	0	0	0	0	0	0	1	0	0	0	0	0	0	0	0	1	0	0	0	0	0	0	0	2	0	0	1	0	0	0	0.712
[(ETO)2IM][Tf2N]	[(ETO)2IM]	[Tf2N]	343.55	75.1	0	2	2	2	0	0	0	0	2	0	0	0	0	0	0	0	0	0	0	1	0	0	0	0	0	0	0	0	1	0	0	0	0	0	0	0	2	0	0	1	0	0	0	0.554
[(ETO)2IM][Tf2N]	[(ETO)2IM]	[Tf2N]	324.15	71.1	0	2	2	2	0	0	0	0	2	0	0	0	0	0	0	0	0	0	0	1	0	0	0	0	0	0	0	0	1	0	0	0	0	0	0	0	2	0	0	1	0	0	0	0.626
[(ETO)2IM][Tf2N]	[(ETO)2IM]	[Tf2N]	334.05	64.8	0	2	2	2	0	0	0	0	2	0	0	0	0	0	0	0	0	0	0	1	0	0	0	0	0	0	0	0	1	0	0	0	0	0	0	0	2	0	0	1	0	0	0	0.554
[(ETO)2IM][Tf2N]	[(ETO)2IM]	[Tf2N]	302.95	60.7	0	2	2	2	0	0	0	0	2	0	0	0	0	0	0	0	0	0	0	1	0	0	0	0	0	0	0	0	1	0	0	0	0	0	0	0	2	0	0	1	0	0	0	0.712
[(ETO)2IM][Tf2N]	[(ETO)2IM]	[Tf2N]	313.35	57.7	0	2	2	2	0	0	0	0	2	0	0	0	0	0	0	0	0	0	0	1	0	0	0	0	0	0	0	0	1	0	0	0	0	0	0	0	2	0	0	1	0	0	0	0.626
[(ETO)2IM][Tf2N]	[(ETO)2IM]	[Tf2N]	324.15	54.6	0	2	2	2	0	0	0	0	2	0	0	0	0	0	0	0	0	0	0	1	0	0	0	0	0	0	0	0	1	0	0	0	0	0	0	0	2	0	0	1	0	0	0	0.554
[(ETO)2IM][Tf2N]	[(ETO)2IM]	[Tf2N]	363.15	52.5	0	2	2	2	0	0	0	0	2	0	0	0	0	0	0	0	0	0	0	1	0	0	0	0	0	0	0	0	1	0	0	0	0	0	0	0	2	0	0	1	0	0	0	0.396
[(ETO)2IM][Tf2N]	[(ETO)2IM]	[Tf2N]	302.95	46.7	0	2	2	2	0	0	0	0	2	0	0	0	0	0	0	0	0	0	0	1	0	0	0	0	0	0	0	0	1	0	0	0	0	0	0	0	2	0	0	1	0	0	0	0.626
[(ETO)2IM][Tf2N]	[(ETO)2IM]	[Tf2N]	353.25	46.6	0	2	2	2	0	0	0	0	2	0	0	0	0	0	0	0	0	0	0	1	0	0	0	0	0	0	0	0	1	0	0	0	0	0	0	0	2	0	0	1	0	0	0	0.396
[(ETO)2IM][Tf2N]	[(ETO)2IM]	[Tf2N]	313.35	44.7	0	2	2	2	0	0	0	0	2	0	0	0	0	0	0	0	0	0	0	1	0	0	0	0	0	0	0	0	1	0	0	0	0	0	0	0	2	0	0	1	0	0	0	0.554
[(ETO)2IM][Tf2N]	[(ETO)2IM]	[Tf2N]	343.65	41.1	0	2	2	2	0	0	0	0	2	0	0	0	0	0	0	0	0	0	0	1	0	0	0	0	0	0	0	0	1	0	0	0	0	0	0	0	2	0	0	1	0	0	0	0.396
[(ETO)2IM][Tf2N]	[(ETO)2IM]	[Tf2N]	302.85	36	0	2	2	2	0	0	0	0	2	0	0	0	0	0	0	0	0	0	0	1	0	0	0	0	0	0	0	0	1	0	0	0	0	0	0	0	2	0	0	1	0	0	0	0.554
[(ETO)2IM][Tf2N]	[(ETO)2IM]	[Tf2N]	333.85	36	0	2	2	2	0	0	0	0	2	0	0	0	0	0	0	0	0	0	0	1	0	0	0	0	0	0	0	0	1	0	0	0	0	0	0	0	2	0	0	1	0	0	0	0.396
[(ETO)2IM][Tf2N]	[(ETO)2IM]	[Tf2N]	324.15	31.2	0	2	2	2	0	0	0	0	2	0	0	0	0	0	0	0	0	0	0	1	0	0	0	0	0	0	0	0	1	0	0	0	0	0	0	0	2	0	0	1	0	0	0	0.396
[(ETO)2IM][Tf2N]	[(ETO)2IM]	[Tf2N]	313.35	25.7	0	2	2	2	0	0	0	0	2	0	0	0	0	0	0	0	0	0	0	1	0	0	0	0	0	0	0	0	1	0	0	0	0	0	0	0	2	0	0	1	0	0	0	0.396
[(ETO)2IM][Tf2N]	[(ETO)2IM]	[Tf2N]	303.65	21.5	0	2	2	2	0	0	0	0	2	0	0	0	0	0	0	0	0	0	0	1	0	0	0	0	0	0	0	0	1	0	0	0	0	0	0	0	2	0	0	1	0	0	0	0.396
[BBIM][MeSO3]	[BBIM]	[MeSO3]	343.15	342	0	2	4	2	0	0	0	0	0	0	0	0	0	0	0	0	0	0	0	1	0	0	0	0	0	0	0	0	0	0	1	0	0	0	0	0	1	0	1	0	0	0	0	0.7738
[BBIM][MeSO3]	[BBIM]	[MeSO3]	332.85	307.5	0	2	4	2	0	0	0	0	0	0	0	0	0	0	0	0	0	0	0	1	0	0	0	0	0	0	0	0	0	0	1	0	0	0	0	0	1	0	1	0	0	0	0	0.7738
[BBIM][MeSO3]	[BBIM]	[MeSO3]	342.45	300.5	0	2	4	2	0	0	0	0	0	0	0	0	0	0	0	0	0	0	0	1	0	0	0	0	0	0	0	0	0	0	1	0	0	0	0	0	1	0	1	0	0	0	0	0.7631
[BBIM][MeSO3]	[BBIM]	[MeSO3]	322.95	271.5	0	2	4	2	0	0	0	0	0	0	0	0	0	0	0	0	0	0	0	1	0	0	0	0	0	0	0	0	0	0	1	0	0	0	0	0	1	0	1	0	0	0	0	0.7738
[BBIM][MeSO3]	[BBIM]	[MeSO3]	332.45	267.5	0	2	4	2	0	0	0	0	0	0	0	0	0	0	0	0	0	0	0	1	0	0	0	0	0	0	0	0	0	0	1	0	0	0	0	0	1	0	1	0	0	0	0	0.7631
[BBIM][MeSO3]	[BBIM]	[MeSO3]	313.95	237	0	2	4	2	0	0	0	0	0	0	0	0	0	0	0	0	0	0	0	1	0	0	0	0	0	0	0	0	0	0	1	0	0	0	0	0	1	0	1	0	0	0	0	0.7738
[BBIM][MeSO3]	[BBIM]	[MeSO3]	322.65	231.5	0	2	4	2	0	0	0	0	0	0	0	0	0	0	0	0	0	0	0	1	0	0	0	0	0	0	0	0	0	0	1	0	0	0	0	0	1	0	1	0	0	0	0	0.7631
[BBIM][MeSO3]	[BBIM]	[MeSO3]	341.75	217.5	0	2	4	2	0	0	0	0	0	0	0	0	0	0	0	0	0	0	0	1	0	0	0	0	0	0	0	0	0	0	1	0	0	0	0	0	1	0	1	0	0	0	0	0.7322
[BBIM][MeSO3]	[BBIM]	[MeSO3]	312.95	193.5	0	2	4	2	0	0	0	0	0	0	0	0	0	0	0	0	0	0	0	1	0	0	0	0	0	0	0	0	0	0	1	0	0	0	0	0	1	0	1	0	0	0	0	0.7631
[BBIM][MeSO3]	[BBIM]	[MeSO3]	302.45	189	0	2	4	2	0	0	0	0	0	0	0	0	0	0	0	0	0	0	0	1	0	0	0	0	0	0	0	0	0	0	1	0	0	0	0	0	1	0	1	0	0	0	0	0.7738
[BBIM][MeSO3]	[BBIM]	[MeSO3]	331.25	183.5	0	2	4	2	0	0	0	0	0	0	0	0	0	0	0	0	0	0	0	1	0	0	0	0	0	0	0	0	0	0	1	0	0	0	0	0	1	0	1	0	0	0	0	0.7322
[BBIM][MeSO3]	[BBIM]	[MeSO3]	299.15	175.5	0	2	4	2	0	0	0	0	0	0	0	0	0	0	0	0	0	0	0	1	0	0	0	0	0	0	0	0	0	0	1	0	0	0	0	0	1	0	1	0	0	0	0	0.7738
[BBIM][MeSO3]	[BBIM]	[MeSO3]	343.15	175.5	0	2	4	2	0	0	0	0	0	0	0	0	0	0	0	0	0	0	0	1	0	0	0	0	0	0	0	0	0	0	1	0	0	0	0	0	1	0	1	0	0	0	0	0.7084
[BBIM][MeSO3]	[BBIM]	[MeSO3]	303.85	156	0	2	4	2	0	0	0	0	0	0	0	0	0	0	0	0	0	0	0	1	0	0	0	0	0	0	0	0	0	0	1	0	0	0	0	0	1	0	1	0	0	0	0	0.7631
[BBIM][MeSO3]	[BBIM]	[MeSO3]	322.05	151.5	0	2	4	2	0	0	0	0	0	0	0	0	0	0	0	0	0	0	0	1	0	0	0	0	0	0	0	0	0	0	1	0	0	0	0	0	1	0	1	0	0	0	0	0.7322
[BBIM][MeSO3]	[BBIM]	[MeSO3]	341.55	144	0	2	4	2	0	0	0	0	0	0	0	0	0	0	0	0	0	0	0	1	0	0	0	0	0	0	0	0	0	0	1	0	0	0	0	0	1	0	1	0	0	0	0	0.6814
[BBIM][MeSO3]	[BBIM]	[MeSO3]	331.55	141.5	0	2	4	2	0	0	0	0	0	0	0	0	0	0	0	0	0	0	0	1	0	0	0	0	0	0	0	0	0	0	1	0	0	0	0	0	1	0	1	0	0	0	0	0.7084
[BBIM][MeSO3]	[BBIM]	[MeSO3]	299.15	137	0	2	4	2	0	0	0	0	0	0	0	0	0	0	0	0	0	0	0	1	0	0	0	0	0	0	0	0	0	0	1	0	0	0	0	0	1	0	1	0	0	0	0	0.7631
[BBIM][MeSO3]	[BBIM]	[MeSO3]	342.95	127.5	0	2	4	2	0	0	0	0	0	0	0	0	0	0	0	0	0	0	0	1	0	0	0	0	0	0	0	0	0	0	1	0	0	0	0	0	1	0	1	0	0	0	0	0.6494
[BBIM][MeSO3]	[BBIM]	[MeSO3]	331.85	120.5	0	2	4	2	0	0	0	0	0	0	0	0	0	0	0	0	0	0	0	1	0	0	0	0	0	0	0	0	0	0	1	0	0	0	0	0	1	0	1	0	0	0	0	0.6814
[BBIM][MeSO3]	[BBIM]	[MeSO3]	312.85	117	0	2	4	2	0	0	0	0	0	0	0	0	0	0	0	0	0	0	0	1	0	0	0	0	0	0	0	0	0	0	1	0	0	0	0	0	1	0	1	0	0	0	0	0.7322
[BBIM][MeSO3]	[BBIM]	[MeSO3]	322.45	114	0	2	4	2	0	0	0	0	0	0	0	0	0	0	0	0	0	0	0	1	0	0	0	0	0	0	0	0	0	0	1	0	0	0	0	0	1	0	1	0	0	0	0	0.7084
[BBIM][MeSO3]	[BBIM]	[MeSO3]	342.85	113	0	2	4	2	0	0	0	0	0	0	0	0	0	0	0	0	0	0	0	1	0	0	0	0	0	0	0	0	0	0	1	0	0	0	0	0	1	0	1	0	0	0	0	0.6161
[BBIM][MeSO3]	[BBIM]	[MeSO3]	332.55	107.5	0	2	4	2	0	0	0	0	0	0	0	0	0	0	0	0	0	0	0	1	0	0	0	0	0	0	0	0	0	0	1	0	0	0	0	0	1	0	1	0	0	0	0	0.6494
[BBIM][MeSO3]	[BBIM]	[MeSO3]	321.85	97.5	0	2	4	2	0	0	0	0	0	0	0	0	0	0	0	0	0	0	0	1	0	0	0	0	0	0	0	0	0	0	1	0	0	0	0	0	1	0	1	0	0	0	0	0.6814
[BBIM][MeSO3]	[BBIM]	[MeSO3]	332.75	97	0	2	4	2	0	0	0	0	0	0	0	0	0	0	0	0	0	0	0	1	0	0	0	0	0	0	0	0	0	0	1	0	0	0	0	0	1	0	1	0	0	0	0	0.6161
[BBIM][MeSO3]	[BBIM]	[MeSO3]	341.45	95.5	0	2	4	2	0	0	0	0	0	0	0	0	0	0	0	0	0	0	0	1	0	0	0	0	0	0	0	0	0	0	1	0	0	0	0	0	1	0	1	0	0	0	0	0.5695
[BBIM][MeSO3]	[BBIM]	[MeSO3]	323.05	90.5	0	2	4	2	0	0	0	0	0	0	0	0	0	0	0	0	0	0	0	1	0	0	0	0	0	0	0	0	0	0	1	0	0	0	0	0	1	0	1	0	0	0	0	0.6494
[BBIM][MeSO3]	[BBIM]	[MeSO3]	313.15	87.5	0	2	4	2	0	0	0	0	0	0	0	0	0	0	0	0	0	0	0	1	0	0	0	0	0	0	0	0	0	0	1	0	0	0	0	0	1	0	1	0	0	0	0	0.7084
[BBIM][MeSO3]	[BBIM]	[MeSO3]	333.15	84.5	0	2	4	2	0	0	0	0	0	0	0	0	0	0	0	0	0	0	0	1	0	0	0	0	0	0	0	0	0	0	1	0	0	0	0	0	1	0	1	0	0	0	0	0.5695
[BBIM][MeSO3]	[BBIM]	[MeSO3]	323.55	83	0	2	4	2	0	0	0	0	0	0	0	0	0	0	0	0	0	0	0	1	0	0	0	0	0	0	0	0	0	0	1	0	0	0	0	0	1	0	1	0	0	0	0	0.6161
[BBIM][MeSO3]	[BBIM]	[MeSO3]	303.15	81.5	0	2	4	2	0	0	0	0	0	0	0	0	0	0	0	0	0	0	0	1	0	0	0	0	0	0	0	0	0	0	1	0	0	0	0	0	1	0	1	0	0	0	0	0.7322
[BBIM][MeSO3]	[BBIM]	[MeSO3]	312.95	80.5	0	2	4	2	0	0	0	0	0	0	0	0	0	0	0	0	0	0	0	1	0	0	0	0	0	0	0	0	0	0	1	0	0	0	0	0	1	0	1	0	0	0	0	0.6814
[BBIM][MeSO3]	[BBIM]	[MeSO3]	342.05	79.5	0	2	4	2	0	0	0	0	0	0	0	0	0	0	0	0	0	0	0	1	0	0	0	0	0	0	0	0	0	0	1	0	0	0	0	0	1	0	1	0	0	0	0	0.5112
[BBIM][MeSO3]	[BBIM]	[MeSO3]	312.95	74	0	2	4	2	0	0	0	0	0	0	0	0	0	0	0	0	0	0	0	1	0	0	0	0	0	0	0	0	0	0	1	0	0	0	0	0	1	0	1	0	0	0	0	0.6494
[BBIM][MeSO3]	[BBIM]	[MeSO3]	322.95	72.5	0	2	4	2	0	0	0	0	0	0	0	0	0	0	0	0	0	0	0	1	0	0	0	0	0	0	0	0	0	0	1	0	0	0	0	0	1	0	1	0	0	0	0	0.5695
[BBIM][MeSO3]	[BBIM]	[MeSO3]	304.15	70	0	2	4	2	0	0	0	0	0	0	0	0	0	0	0	0	0	0	0	1	0	0	0	0	0	0	0	0	0	0	1	0	0	0	0	0	1	0	1	0	0	0	0	0.7084
[BBIM][MeSO3]	[BBIM]	[MeSO3]	332.85	70	0	2	4	2	0	0	0	0	0	0	0	0	0	0	0	0	0	0	0	1	0	0	0	0	0	0	0	0	0	0	1	0	0	0	0	0	1	0	1	0	0	0	0	0.5112
[BBIM][MeSO3]	[BBIM]	[MeSO3]	313.65	69.5	0	2	4	2	0	0	0	0	0	0	0	0	0	0	0	0	0	0	0	1	0	0	0	0	0	0	0	0	0	0	1	0	0	0	0	0	1	0	1	0	0	0	0	0.6161
[BBIM][MeSO3]	[BBIM]	[MeSO3]	305.25	67.5	0	2	4	2	0	0	0	0	0	0	0	0	0	0	0	0	0	0	0	1	0	0	0	0	0	0	0	0	0	0	1	0	0	0	0	0	1	0	1	0	0	0	0	0.6814
[BBIM][MeSO3]	[BBIM]	[MeSO3]	305.25	63.5	0	2	4	2	0	0	0	0	0	0	0	0	0	0	0	0	0	0	0	1	0	0	0	0	0	0	0	0	0	0	1	0	0	0	0	0	1	0	1	0	0	0	0	0.6494
[BBIM][MeSO3]	[BBIM]	[MeSO3]	297.95	62.5	0	2	4	2	0	0	0	0	0	0	0	0	0	0	0	0	0	0	0	1	0	0	0	0	0	0	0	0	0	0	1	0	0	0	0	0	1	0	1	0	0	0	0	0.7322
[BBIM][MeSO3]	[BBIM]	[MeSO3]	313.55	61.5	0	2	4	2	0	0	0	0	0	0	0	0	0	0	0	0	0	0	0	1	0	0	0	0	0	0	0	0	0	0	1	0	0	0	0	0	1	0	1	0	0	0	0	0.5695
[BBIM][MeSO3]	[BBIM]	[MeSO3]	323.45	61	0	2	4	2	0	0	0	0	0	0	0	0	0	0	0	0	0	0	0	1	0	0	0	0	0	0	0	0	0	0	1	0	0	0	0	0	1	0	1	0	0	0	0	0.5112
[BBIM][MeSO3]	[BBIM]	[MeSO3]	297.55	59.5	0	2	4	2	0	0	0	0	0	0	0	0	0	0	0	0	0	0	0	1	0	0	0	0	0	0	0	0	0	0	1	0	0	0	0	0	1	0	1	0	0	0	0	0.7084
[BBIM][MeSO3]	[BBIM]	[MeSO3]	343.35	58.5	0	2	4	2	0	0	0	0	0	0	0	0	0	0	0	0	0	0	0	1	0	0	0	0	0	0	0	0	0	0	1	0	0	0	0	0	1	0	1	0	0	0	0	0.4085
[BBIM][MeSO3]	[BBIM]	[MeSO3]	303.75	57.5	0	2	4	2	0	0	0	0	0	0	0	0	0	0	0	0	0	0	0	1	0	0	0	0	0	0	0	0	0	0	1	0	0	0	0	0	1	0	1	0	0	0	0	0.6161
[BBIM][MeSO3]	[BBIM]	[MeSO3]	297.75	57	0	2	4	2	0	0	0	0	0	0	0	0	0	0	0	0	0	0	0	1	0	0	0	0	0	0	0	0	0	0	1	0	0	0	0	0	1	0	1	0	0	0	0	0.6814
[BBIM][MeSO3]	[BBIM]	[MeSO3]	297.75	54	0	2	4	2	0	0	0	0	0	0	0	0	0	0	0	0	0	0	0	1	0	0	0	0	0	0	0	0	0	0	1	0	0	0	0	0	1	0	1	0	0	0	0	0.6494
[BBIM][MeSO3]	[BBIM]	[MeSO3]	314.15	53	0	2	4	2	0	0	0	0	0	0	0	0	0	0	0	0	0	0	0	1	0	0	0	0	0	0	0	0	0	0	1	0	0	0	0	0	1	0	1	0	0	0	0	0.5112
[BBIM][MeSO3]	[BBIM]	[MeSO3]	334.15	53	0	2	4	2	0	0	0	0	0	0	0	0	0	0	0	0	0	0	0	1	0	0	0	0	0	0	0	0	0	0	1	0	0	0	0	0	1	0	1	0	0	0	0	0.4085
[BBIM][MeSO3]	[BBIM]	[MeSO3]	304.05	52	0	2	4	2	0	0	0	0	0	0	0	0	0	0	0	0	0	0	0	1	0	0	0	0	0	0	0	0	0	0	1	0	0	0	0	0	1	0	1	0	0	0	0	0.5695
[BBIM][MeSO3]	[BBIM]	[MeSO3]	298.15	51	0	2	4	2	0	0	0	0	0	0	0	0	0	0	0	0	0	0	0	1	0	0	0	0	0	0	0	0	0	0	1	0	0	0	0	0	1	0	1	0	0	0	0	0.6161
[BBIM][MeSO3]	[BBIM]	[MeSO3]	323.75	46	0	2	4	2	0	0	0	0	0	0	0	0	0	0	0	0	0	0	0	1	0	0	0	0	0	0	0	0	0	0	1	0	0	0	0	0	1	0	1	0	0	0	0	0.4085
[BBIM][MeSO3]	[BBIM]	[MeSO3]	297.65	45.5	0	2	4	2	0	0	0	0	0	0	0	0	0	0	0	0	0	0	0	1	0	0	0	0	0	0	0	0	0	0	1	0	0	0	0	0	1	0	1	0	0	0	0	0.5695
[BBIM][MeSO3]	[BBIM]	[MeSO3]	304.25	44.5	0	2	4	2	0	0	0	0	0	0	0	0	0	0	0	0	0	0	0	1	0	0	0	0	0	0	0	0	0	0	1	0	0	0	0	0	1	0	1	0	0	0	0	0.5112
[BBIM][MeSO3]	[BBIM]	[MeSO3]	313.95	40	0	2	4	2	0	0	0	0	0	0	0	0	0	0	0	0	0	0	0	1	0	0	0	0	0	0	0	0	0	0	1	0	0	0	0	0	1	0	1	0	0	0	0	0.4085
[BBIM][MeSO3]	[BBIM]	[MeSO3]	343.35	39.5	0	2	4	2	0	0	0	0	0	0	0	0	0	0	0	0	0	0	0	1	0	0	0	0	0	0	0	0	0	0	1	0	0	0	0	0	1	0	1	0	0	0	0	0.2861
[BBIM][MeSO3]	[BBIM]	[MeSO3]	297.25	39	0	2	4	2	0	0	0	0	0	0	0	0	0	0	0	0	0	0	0	1	0	0	0	0	0	0	0	0	0	0	1	0	0	0	0	0	1	0	1	0	0	0	0	0.5112
[BBIM][MeSO3]	[BBIM]	[MeSO3]	333.05	35.5	0	2	4	2	0	0	0	0	0	0	0	0	0	0	0	0	0	0	0	1	0	0	0	0	0	0	0	0	0	0	1	0	0	0	0	0	1	0	1	0	0	0	0	0.2861
[BBIM][MeSO3]	[BBIM]	[MeSO3]	304.45	34.5	0	2	4	2	0	0	0	0	0	0	0	0	0	0	0	0	0	0	0	1	0	0	0	0	0	0	0	0	0	0	1	0	0	0	0	0	1	0	1	0	0	0	0	0.4085
[BBIM][MeSO3]	[BBIM]	[MeSO3]	323.45	32	0	2	4	2	0	0	0	0	0	0	0	0	0	0	0	0	0	0	0	1	0	0	0	0	0	0	0	0	0	0	1	0	0	0	0	0	1	0	1	0	0	0	0	0.2861
[BBIM][MeSO3]	[BBIM]	[MeSO3]	297.25	31	0	2	4	2	0	0	0	0	0	0	0	0	0	0	0	0	0	0	0	1	0	0	0	0	0	0	0	0	0	0	1	0	0	0	0	0	1	0	1	0	0	0	0	0.4085
[BBIM][MeSO3]	[BBIM]	[MeSO3]	313.85	28.5	0	2	4	2	0	0	0	0	0	0	0	0	0	0	0	0	0	0	0	1	0	0	0	0	0	0	0	0	0	0	1	0	0	0	0	0	1	0	1	0	0	0	0	0.2861
[BBIM][MeSO3]	[BBIM]	[MeSO3]	304.15	25	0	2	4	2	0	0	0	0	0	0	0	0	0	0	0	0	0	0	0	1	0	0	0	0	0	0	0	0	0	0	1	0	0	0	0	0	1	0	1	0	0	0	0	0.2861
[BBIM][MeSO3]	[BBIM]	[MeSO3]	297.05	22.5	0	2	4	2	0	0	0	0	0	0	0	0	0	0	0	0	0	0	0	1	0	0	0	0	0	0	0	0	0	0	1	0	0	0	0	0	1	0	1	0	0	0	0	0.2861
[BBIM][MeSO3]	[BBIM]	[MeSO3]	342.25	21.5	0	2	4	2	0	0	0	0	0	0	0	0	0	0	0	0	0	0	0	1	0	0	0	0	0	0	0	0	0	0	1	0	0	0	0	0	1	0	1	0	0	0	0	0.1389
[BBIM][MeSO3]	[BBIM]	[MeSO3]	332.65	20	0	2	4	2	0	0	0	0	0	0	0	0	0	0	0	0	0	0	0	1	0	0	0	0	0	0	0	0	0	0	1	0	0	0	0	0	1	0	1	0	0	0	0	0.1389
[BBIM][MeSO3]	[BBIM]	[MeSO3]	322.95	18.5	0	2	4	2	0	0	0	0	0	0	0	0	0	0	0	0	0	0	0	1	0	0	0	0	0	0	0	0	0	0	1	0	0	0	0	0	1	0	1	0	0	0	0	0.1389
[BBIM][MeSO3]	[BBIM]	[MeSO3]	312.55	17	0	2	4	2	0	0	0	0	0	0	0	0	0	0	0	0	0	0	0	1	0	0	0	0	0	0	0	0	0	0	1	0	0	0	0	0	1	0	1	0	0	0	0	0.1389
[BBIM][MeSO3]	[BBIM]	[MeSO3]	304.95	16	0	2	4	2	0	0	0	0	0	0	0	0	0	0	0	0	0	0	0	1	0	0	0	0	0	0	0	0	0	0	1	0	0	0	0	0	1	0	1	0	0	0	0	0.1389
[BBIM][MeSO3]	[BBIM]	[MeSO3]	296.95	15	0	2	4	2	0	0	0	0	0	0	0	0	0	0	0	0	0	0	0	1	0	0	0	0	0	0	0	0	0	0	1	0	0	0	0	0	1	0	1	0	0	0	0	0.1389
[BMIM][MeSO3]	[BMIM]	[MeSO3]	343.15	357	1	1	4	2	0	0	0	0	0	0	0	0	0	0	0	0	0	0	0	1	0	0	0	0	0	0	0	0	0	0	1	0	0	0	0	0	1	0	1	0	0	0	0	0.5219
[BMIM][MeSO3]	[BMIM]	[MeSO3]	333.55	317.5	1	1	4	2	0	0	0	0	0	0	0	0	0	0	0	0	0	0	0	1	0	0	0	0	0	0	0	0	0	0	1	0	0	0	0	0	1	0	1	0	0	0	0	0.5219
[BMIM][MeSO3]	[BMIM]	[MeSO3]	342.95	307.5	1	1	4	2	0	0	0	0	0	0	0	0	0	0	0	0	0	0	0	1	0	0	0	0	0	0	0	0	0	0	1	0	0	0	0	0	1	0	1	0	0	0	0	0.4974
[BMIM][MeSO3]	[BMIM]	[MeSO3]	323.75	266.5	1	1	4	2	0	0	0	0	0	0	0	0	0	0	0	0	0	0	0	1	0	0	0	0	0	0	0	0	0	0	1	0	0	0	0	0	1	0	1	0	0	0	0	0.5219
[BMIM][MeSO3]	[BMIM]	[MeSO3]	333.15	263.5	1	1	4	2	0	0	0	0	0	0	0	0	0	0	0	0	0	0	0	1	0	0	0	0	0	0	0	0	0	0	1	0	0	0	0	0	1	0	1	0	0	0	0	0.4974
[BMIM][MeSO3]	[BMIM]	[MeSO3]	313.75	216	1	1	4	2	0	0	0	0	0	0	0	0	0	0	0	0	0	0	0	1	0	0	0	0	0	0	0	0	0	0	1	0	0	0	0	0	1	0	1	0	0	0	0	0.5219
[BMIM][MeSO3]	[BMIM]	[MeSO3]	323.25	214	1	1	4	2	0	0	0	0	0	0	0	0	0	0	0	0	0	0	0	1	0	0	0	0	0	0	0	0	0	0	1	0	0	0	0	0	1	0	1	0	0	0	0	0.4974
[BMIM][MeSO3]	[BMIM]	[MeSO3]	342.95	196	1	1	4	2	0	0	0	0	0	0	0	0	0	0	0	0	0	0	0	1	0	0	0	0	0	0	0	0	0	0	1	0	0	0	0	0	1	0	1	0	0	0	0	0.4576
[BMIM][MeSO3]	[BMIM]	[MeSO3]	313.35	160	1	1	4	2	0	0	0	0	0	0	0	0	0	0	0	0	0	0	0	1	0	0	0	0	0	0	0	0	0	0	1	0	0	0	0	0	1	0	1	0	0	0	0	0.4974
[BMIM][MeSO3]	[BMIM]	[MeSO3]	304.45	158	1	1	4	2	0	0	0	0	0	0	0	0	0	0	0	0	0	0	0	1	0	0	0	0	0	0	0	0	0	0	1	0	0	0	0	0	1	0	1	0	0	0	0	0.5219
[BMIM][MeSO3]	[BMIM]	[MeSO3]	333.15	156	1	1	4	2	0	0	0	0	0	0	0	0	0	0	0	0	0	0	0	1	0	0	0	0	0	0	0	0	0	0	1	0	0	0	0	0	1	0	1	0	0	0	0	0.4576
[BMIM][MeSO3]	[BMIM]	[MeSO3]	343.15	120.5	1	1	4	2	0	0	0	0	0	0	0	0	0	0	0	0	0	0	0	1	0	0	0	0	0	0	0	0	0	0	1	0	0	0	0	0	1	0	1	0	0	0	0	0.3971
[BMIM][MeSO3]	[BMIM]	[MeSO3]	323.35	116.5	1	1	4	2	0	0	0	0	0	0	0	0	0	0	0	0	0	0	0	1	0	0	0	0	0	0	0	0	0	0	1	0	0	0	0	0	1	0	1	0	0	0	0	0.4576
[BMIM][MeSO3]	[BMIM]	[MeSO3]	332.95	98	1	1	4	2	0	0	0	0	0	0	0	0	0	0	0	0	0	0	0	1	0	0	0	0	0	0	0	0	0	0	1	0	0	0	0	0	1	0	1	0	0	0	0	0.3971
[BMIM][MeSO3]	[BMIM]	[MeSO3]	302.45	97	1	1	4	2	0	0	0	0	0	0	0	0	0	0	0	0	0	0	0	1	0	0	0	0	0	0	0	0	0	0	1	0	0	0	0	0	1	0	1	0	0	0	0	0.4974
[BMIM][MeSO3]	[BMIM]	[MeSO3]	342.75	96.5	1	1	4	2	0	0	0	0	0	0	0	0	0	0	0	0	0	0	0	1	0	0	0	0	0	0	0	0	0	0	1	0	0	0	0	0	1	0	1	0	0	0	0	0.3547
[BMIM][MeSO3]	[BMIM]	[MeSO3]	313.25	82.5	1	1	4	2	0	0	0	0	0	0	0	0	0	0	0	0	0	0	0	1	0	0	0	0	0	0	0	0	0	0	1	0	0	0	0	0	1	0	1	0	0	0	0	0.4576
[BMIM][MeSO3]	[BMIM]	[MeSO3]	332.95	80.5	1	1	4	2	0	0	0	0	0	0	0	0	0	0	0	0	0	0	0	1	0	0	0	0	0	0	0	0	0	0	1	0	0	0	0	0	1	0	1	0	0	0	0	0.3547
[BMIM][MeSO3]	[BMIM]	[MeSO3]	323.05	78.5	1	1	4	2	0	0	0	0	0	0	0	0	0	0	0	0	0	0	0	1	0	0	0	0	0	0	0	0	0	0	1	0	0	0	0	0	1	0	1	0	0	0	0	0.3971
[BMIM][MeSO3]	[BMIM]	[MeSO3]	342.75	72	1	1	4	2	0	0	0	0	0	0	0	0	0	0	0	0	0	0	0	1	0	0	0	0	0	0	0	0	0	0	1	0	0	0	0	0	1	0	1	0	0	0	0	0.2941
[BMIM][MeSO3]	[BMIM]	[MeSO3]	322.95	65.5	1	1	4	2	0	0	0	0	0	0	0	0	0	0	0	0	0	0	0	1	0	0	0	0	0	0	0	0	0	0	1	0	0	0	0	0	1	0	1	0	0	0	0	0.3547
[BMIM][MeSO3]	[BMIM]	[MeSO3]	303.35	62	1	1	4	2	0	0	0	0	0	0	0	0	0	0	0	0	0	0	0	1	0	0	0	0	0	0	0	0	0	0	1	0	0	0	0	0	1	0	1	0	0	0	0	0.4576
[BMIM][MeSO3]	[BMIM]	[MeSO3]	312.45	61.5	1	1	4	2	0	0	0	0	0	0	0	0	0	0	0	0	0	0	0	1	0	0	0	0	0	0	0	0	0	0	1	0	0	0	0	0	1	0	1	0	0	0	0	0.3971
[BMIM][MeSO3]	[BMIM]	[MeSO3]	332.75	60.5	1	1	4	2	0	0	0	0	0	0	0	0	0	0	0	0	0	0	0	1	0	0	0	0	0	0	0	0	0	0	1	0	0	0	0	0	1	0	1	0	0	0	0	0.2941
[BMIM][MeSO3]	[BMIM]	[MeSO3]	342.75	57.5	1	1	4	2	0	0	0	0	0	0	0	0	0	0	0	0	0	0	0	1	0	0	0	0	0	0	0	0	0	0	1	0	0	0	0	0	1	0	1	0	0	0	0	0.2482
[BMIM][MeSO3]	[BMIM]	[MeSO3]	313.25	53	1	1	4	2	0	0	0	0	0	0	0	0	0	0	0	0	0	0	0	1	0	0	0	0	0	0	0	0	0	0	1	0	0	0	0	0	1	0	1	0	0	0	0	0.3547
[BMIM][MeSO3]	[BMIM]	[MeSO3]	323.05	50.5	1	1	4	2	0	0	0	0	0	0	0	0	0	0	0	0	0	0	0	1	0	0	0	0	0	0	0	0	0	0	1	0	0	0	0	0	1	0	1	0	0	0	0	0.2941
[BMIM][MeSO3]	[BMIM]	[MeSO3]	302.65	49.5	1	1	4	2	0	0	0	0	0	0	0	0	0	0	0	0	0	0	0	1	0	0	0	0	0	0	0	0	0	0	1	0	0	0	0	0	1	0	1	0	0	0	0	0.3971
[BMIM][MeSO3]	[BMIM]	[MeSO3]	333.85	49	1	1	4	2	0	0	0	0	0	0	0	0	0	0	0	0	0	0	0	1	0	0	0	0	0	0	0	0	0	0	1	0	0	0	0	0	1	0	1	0	0	0	0	0.2482
[BMIM][MeSO3]	[BMIM]	[MeSO3]	303.05	42	1	1	4	2	0	0	0	0	0	0	0	0	0	0	0	0	0	0	0	1	0	0	0	0	0	0	0	0	0	0	1	0	0	0	0	0	1	0	1	0	0	0	0	0.3547
[BMIM][MeSO3]	[BMIM]	[MeSO3]	312.95	41	1	1	4	2	0	0	0	0	0	0	0	0	0	0	0	0	0	0	0	1	0	0	0	0	0	0	0	0	0	0	1	0	0	0	0	0	1	0	1	0	0	0	0	0.2941
[BMIM][MeSO3]	[BMIM]	[MeSO3]	323.65	40.5	1	1	4	2	0	0	0	0	0	0	0	0	0	0	0	0	0	0	0	1	0	0	0	0	0	0	0	0	0	0	1	0	0	0	0	0	1	0	1	0	0	0	0	0.2482
[BMIM][MeSO3]	[BMIM]	[MeSO3]	342.35	39.5	1	1	4	2	0	0	0	0	0	0	0	0	0	0	0	0	0	0	0	1	0	0	0	0	0	0	0	0	0	0	1	0	0	0	0	0	1	0	1	0	0	0	0	0.1835
[BMIM][MeSO3]	[BMIM]	[MeSO3]	332.55	33.5	1	1	4	2	0	0	0	0	0	0	0	0	0	0	0	0	0	0	0	1	0	0	0	0	0	0	0	0	0	0	1	0	0	0	0	0	1	0	1	0	0	0	0	0.1835
[BMIM][MeSO3]	[BMIM]	[MeSO3]	313.45	33	1	1	4	2	0	0	0	0	0	0	0	0	0	0	0	0	0	0	0	1	0	0	0	0	0	0	0	0	0	0	1	0	0	0	0	0	1	0	1	0	0	0	0	0.2482
[BMIM][MeSO3]	[BMIM]	[MeSO3]	302.75	32.5	1	1	4	2	0	0	0	0	0	0	0	0	0	0	0	0	0	0	0	1	0	0	0	0	0	0	0	0	0	0	1	0	0	0	0	0	1	0	1	0	0	0	0	0.2941
[BMIM][MeSO3]	[BMIM]	[MeSO3]	343.05	31.5	1	1	4	2	0	0	0	0	0	0	0	0	0	0	0	0	0	0	0	1	0	0	0	0	0	0	0	0	0	0	1	0	0	0	0	0	1	0	1	0	0	0	0	0.1467
[BMIM][MeSO3]	[BMIM]	[MeSO3]	342.85	28.5	1	1	4	2	0	0	0	0	0	0	0	0	0	0	0	0	0	0	0	1	0	0	0	0	0	0	0	0	0	0	1	0	0	0	0	0	1	0	1	0	0	0	0	0.13
[BMIM][MeSO3]	[BMIM]	[MeSO3]	322.85	28	1	1	4	2	0	0	0	0	0	0	0	0	0	0	0	0	0	0	0	1	0	0	0	0	0	0	0	0	0	0	1	0	0	0	0	0	1	0	1	0	0	0	0	0.1835
[BMIM][MeSO3]	[BMIM]	[MeSO3]	332.85	26.5	1	1	4	2	0	0	0	0	0	0	0	0	0	0	0	0	0	0	0	1	0	0	0	0	0	0	0	0	0	0	1	0	0	0	0	0	1	0	1	0	0	0	0	0.1467
[BMIM][MeSO3]	[BMIM]	[MeSO3]	302.45	26	1	1	4	2	0	0	0	0	0	0	0	0	0	0	0	0	0	0	0	1	0	0	0	0	0	0	0	0	0	0	1	0	0	0	0	0	1	0	1	0	0	0	0	0.2482
[BMIM][MeSO3]	[BMIM]	[MeSO3]	332.85	24.5	1	1	4	2	0	0	0	0	0	0	0	0	0	0	0	0	0	0	0	1	0	0	0	0	0	0	0	0	0	0	1	0	0	0	0	0	1	0	1	0	0	0	0	0.13
[BMIM][MeSO3]	[BMIM]	[MeSO3]	313.35	23.5	1	1	4	2	0	0	0	0	0	0	0	0	0	0	0	0	0	0	0	1	0	0	0	0	0	0	0	0	0	0	1	0	0	0	0	0	1	0	1	0	0	0	0	0.1835
[BMIM][MeSO3]	[BMIM]	[MeSO3]	324.05	22.5	1	1	4	2	0	0	0	0	0	0	0	0	0	0	0	0	0	0	0	1	0	0	0	0	0	0	0	0	0	0	1	0	0	0	0	0	1	0	1	0	0	0	0	0.1467
[BMIM][MeSO3]	[BMIM]	[MeSO3]	342.35	20.5	1	1	4	2	0	0	0	0	0	0	0	0	0	0	0	0	0	0	0	1	0	0	0	0	0	0	0	0	0	0	1	0	0	0	0	0	1	0	1	0	0	0	0	0.0904
[BMIM][MeSO3]	[BMIM]	[MeSO3]	323.15	20.5	1	1	4	2	0	0	0	0	0	0	0	0	0	0	0	0	0	0	0	1	0	0	0	0	0	0	0	0	0	0	1	0	0	0	0	0	1	0	1	0	0	0	0	0.13
[BMIM][MeSO3]	[BMIM]	[MeSO3]	314.45	19	1	1	4	2	0	0	0	0	0	0	0	0	0	0	0	0	0	0	0	1	0	0	0	0	0	0	0	0	0	0	1	0	0	0	0	0	1	0	1	0	0	0	0	0.1467
[BMIM][MeSO3]	[BMIM]	[MeSO3]	302.35	18.5	1	1	4	2	0	0	0	0	0	0	0	0	0	0	0	0	0	0	0	1	0	0	0	0	0	0	0	0	0	0	1	0	0	0	0	0	1	0	1	0	0	0	0	0.1835
[BMIM][MeSO3]	[BMIM]	[MeSO3]	332.95	17.5	1	1	4	2	0	0	0	0	0	0	0	0	0	0	0	0	0	0	0	1	0	0	0	0	0	0	0	0	0	0	1	0	0	0	0	0	1	0	1	0	0	0	0	0.0904
[BMIM][MeSO3]	[BMIM]	[MeSO3]	313.85	17	1	1	4	2	0	0	0	0	0	0	0	0	0	0	0	0	0	0	0	1	0	0	0	0	0	0	0	0	0	0	1	0	0	0	0	0	1	0	1	0	0	0	0	0.13
[BMIM][MeSO3]	[BMIM]	[MeSO3]	303.95	15	1	1	4	2	0	0	0	0	0	0	0	0	0	0	0	0	0	0	0	1	0	0	0	0	0	0	0	0	0	0	1	0	0	0	0	0	1	0	1	0	0	0	0	0.1467
[BMIM][MeSO3]	[BMIM]	[MeSO3]	323.15	14.5	1	1	4	2	0	0	0	0	0	0	0	0	0	0	0	0	0	0	0	1	0	0	0	0	0	0	0	0	0	0	1	0	0	0	0	0	1	0	1	0	0	0	0	0.0904
[BMIM][MeSO3]	[BMIM]	[MeSO3]	303.85	14	1	1	4	2	0	0	0	0	0	0	0	0	0	0	0	0	0	0	0	1	0	0	0	0	0	0	0	0	0	0	1	0	0	0	0	0	1	0	1	0	0	0	0	0.13
[BMIM][MeSO3]	[BMIM]	[MeSO3]	342.75	13	1	1	4	2	0	0	0	0	0	0	0	0	0	0	0	0	0	0	0	1	0	0	0	0	0	0	0	0	0	0	1	0	0	0	0	0	1	0	1	0	0	0	0	0.0517
[BMIM][MeSO3]	[BMIM]	[MeSO3]	314.55	12.5	1	1	4	2	0	0	0	0	0	0	0	0	0	0	0	0	0	0	0	1	0	0	0	0	0	0	0	0	0	0	1	0	0	0	0	0	1	0	1	0	0	0	0	0.0904
[BMIM][MeSO3]	[BMIM]	[MeSO3]	333.05	10.5	1	1	4	2	0	0	0	0	0	0	0	0	0	0	0	0	0	0	0	1	0	0	0	0	0	0	0	0	0	0	1	0	0	0	0	0	1	0	1	0	0	0	0	0.0517
[BMIM][MeSO3]	[BMIM]	[MeSO3]	304.55	10	1	1	4	2	0	0	0	0	0	0	0	0	0	0	0	0	0	0	0	1	0	0	0	0	0	0	0	0	0	0	1	0	0	0	0	0	1	0	1	0	0	0	0	0.0904
[BMIM][MeSO3]	[BMIM]	[MeSO3]	323.65	9	1	1	4	2	0	0	0	0	0	0	0	0	0	0	0	0	0	0	0	1	0	0	0	0	0	0	0	0	0	0	1	0	0	0	0	0	1	0	1	0	0	0	0	0.0517
[BMIM][MeSO3]	[BMIM]	[MeSO3]	314.05	7	1	1	4	2	0	0	0	0	0	0	0	0	0	0	0	0	0	0	0	1	0	0	0	0	0	0	0	0	0	0	1	0	0	0	0	0	1	0	1	0	0	0	0	0.0517
[BMIM][MeSO3]	[BMIM]	[MeSO3]	303.35	5.5	1	1	4	2	0	0	0	0	0	0	0	0	0	0	0	0	0	0	0	1	0	0	0	0	0	0	0	0	0	0	1	0	0	0	0	0	1	0	1	0	0	0	0	0.0517
[EMIM][MeSO3]	[EMIM]	[MeSO3]	332.75	461.5	1	1	2	2	0	0	0	0	0	0	0	0	0	0	0	0	0	0	0	1	0	0	0	0	0	0	0	0	0	0	1	0	0	0	0	0	1	0	1	0	0	0	0	0.4518
[EMIM][MeSO3]	[EMIM]	[MeSO3]	323.15	396	1	1	2	2	0	0	0	0	0	0	0	0	0	0	0	0	0	0	0	1	0	0	0	0	0	0	0	0	0	0	1	0	0	0	0	0	1	0	1	0	0	0	0	0.4518
[EMIM][MeSO3]	[EMIM]	[MeSO3]	342.65	382	1	1	2	2	0	0	0	0	0	0	0	0	0	0	0	0	0	0	0	1	0	0	0	0	0	0	0	0	0	0	1	0	0	0	0	0	1	0	1	0	0	0	0	0.4349
[EMIM][MeSO3]	[EMIM]	[MeSO3]	313.65	327	1	1	2	2	0	0	0	0	0	0	0	0	0	0	0	0	0	0	0	1	0	0	0	0	0	0	0	0	0	0	1	0	0	0	0	0	1	0	1	0	0	0	0	0.4518
[EMIM][MeSO3]	[EMIM]	[MeSO3]	332.55	325	1	1	2	2	0	0	0	0	0	0	0	0	0	0	0	0	0	0	0	1	0	0	0	0	0	0	0	0	0	0	1	0	0	0	0	0	1	0	1	0	0	0	0	0.4349
[EMIM][MeSO3]	[EMIM]	[MeSO3]	342.55	318	1	1	2	2	0	0	0	0	0	0	0	0	0	0	0	0	0	0	0	1	0	0	0	0	0	0	0	0	0	0	1	0	0	0	0	0	1	0	1	0	0	0	0	0.4153
[EMIM][MeSO3]	[EMIM]	[MeSO3]	332.95	266.5	1	1	2	2	0	0	0	0	0	0	0	0	0	0	0	0	0	0	0	1	0	0	0	0	0	0	0	0	0	0	1	0	0	0	0	0	1	0	1	0	0	0	0	0.4153
[EMIM][MeSO3]	[EMIM]	[MeSO3]	322.55	262.5	1	1	2	2	0	0	0	0	0	0	0	0	0	0	0	0	0	0	0	1	0	0	0	0	0	0	0	0	0	0	1	0	0	0	0	0	1	0	1	0	0	0	0	0.4349
[EMIM][MeSO3]	[EMIM]	[MeSO3]	303.95	247.5	1	1	2	2	0	0	0	0	0	0	0	0	0	0	0	0	0	0	0	1	0	0	0	0	0	0	0	0	0	0	1	0	0	0	0	0	1	0	1	0	0	0	0	0.4518
[EMIM][MeSO3]	[EMIM]	[MeSO3]	323.15	209.5	1	1	2	2	0	0	0	0	0	0	0	0	0	0	0	0	0	0	0	1	0	0	0	0	0	0	0	0	0	0	1	0	0	0	0	0	1	0	1	0	0	0	0	0.4153
[EMIM][MeSO3]	[EMIM]	[MeSO3]	313.65	203.5	1	1	2	2	0	0	0	0	0	0	0	0	0	0	0	0	0	0	0	1	0	0	0	0	0	0	0	0	0	0	1	0	0	0	0	0	1	0	1	0	0	0	0	0.4349
[EMIM][MeSO3]	[EMIM]	[MeSO3]	342.85	190.5	1	1	2	2	0	0	0	0	0	0	0	0	0	0	0	0	0	0	0	1	0	0	0	0	0	0	0	0	0	0	1	0	0	0	0	0	1	0	1	0	0	0	0	0.3741
[EMIM][MeSO3]	[EMIM]	[MeSO3]	314.25	156.5	1	1	2	2	0	0	0	0	0	0	0	0	0	0	0	0	0	0	0	1	0	0	0	0	0	0	0	0	0	0	1	0	0	0	0	0	1	0	1	0	0	0	0	0.4153
[EMIM][MeSO3]	[EMIM]	[MeSO3]	332.75	147.5	1	1	2	2	0	0	0	0	0	0	0	0	0	0	0	0	0	0	0	1	0	0	0	0	0	0	0	0	0	0	1	0	0	0	0	0	1	0	1	0	0	0	0	0.3741
[EMIM][MeSO3]	[EMIM]	[MeSO3]	303.55	133	1	1	2	2	0	0	0	0	0	0	0	0	0	0	0	0	0	0	0	1	0	0	0	0	0	0	0	0	0	0	1	0	0	0	0	0	1	0	1	0	0	0	0	0.4349
[EMIM][MeSO3]	[EMIM]	[MeSO3]	342.25	117.5	1	1	2	2	0	0	0	0	0	0	0	0	0	0	0	0	0	0	0	1	0	0	0	0	0	0	0	0	0	0	1	0	0	0	0	0	1	0	1	0	0	0	0	0.3243
[EMIM][MeSO3]	[EMIM]	[MeSO3]	323.15	107	1	1	2	2	0	0	0	0	0	0	0	0	0	0	0	0	0	0	0	1	0	0	0	0	0	0	0	0	0	0	1	0	0	0	0	0	1	0	1	0	0	0	0	0.3741
[EMIM][MeSO3]	[EMIM]	[MeSO3]	304.65	95.5	1	1	2	2	0	0	0	0	0	0	0	0	0	0	0	0	0	0	0	1	0	0	0	0	0	0	0	0	0	0	1	0	0	0	0	0	1	0	1	0	0	0	0	0.4153
[EMIM][MeSO3]	[EMIM]	[MeSO3]	332.55	95	1	1	2	2	0	0	0	0	0	0	0	0	0	0	0	0	0	0	0	1	0	0	0	0	0	0	0	0	0	0	1	0	0	0	0	0	1	0	1	0	0	0	0	0.3243
[EMIM][MeSO3]	[EMIM]	[MeSO3]	342.55	79	1	1	2	2	0	0	0	0	0	0	0	0	0	0	0	0	0	0	0	1	0	0	0	0	0	0	0	0	0	0	1	0	0	0	0	0	1	0	1	0	0	0	0	0.2654
[EMIM][MeSO3]	[EMIM]	[MeSO3]	313.15	78	1	1	2	2	0	0	0	0	0	0	0	0	0	0	0	0	0	0	0	1	0	0	0	0	0	0	0	0	0	0	1	0	0	0	0	0	1	0	1	0	0	0	0	0.3741
[EMIM][MeSO3]	[EMIM]	[MeSO3]	323.05	76.5	1	1	2	2	0	0	0	0	0	0	0	0	0	0	0	0	0	0	0	1	0	0	0	0	0	0	0	0	0	0	1	0	0	0	0	0	1	0	1	0	0	0	0	0.3243
[EMIM][MeSO3]	[EMIM]	[MeSO3]	332.35	66.5	1	1	2	2	0	0	0	0	0	0	0	0	0	0	0	0	0	0	0	1	0	0	0	0	0	0	0	0	0	0	1	0	0	0	0	0	1	0	1	0	0	0	0	0.2654
[EMIM][MeSO3]	[EMIM]	[MeSO3]	313.45	61.5	1	1	2	2	0	0	0	0	0	0	0	0	0	0	0	0	0	0	0	1	0	0	0	0	0	0	0	0	0	0	1	0	0	0	0	0	1	0	1	0	0	0	0	0.3243
[EMIM][MeSO3]	[EMIM]	[MeSO3]	303.05	58.5	1	1	2	2	0	0	0	0	0	0	0	0	0	0	0	0	0	0	0	1	0	0	0	0	0	0	0	0	0	0	1	0	0	0	0	0	1	0	1	0	0	0	0	0.3741
[EMIM][MeSO3]	[EMIM]	[MeSO3]	322.85	55	1	1	2	2	0	0	0	0	0	0	0	0	0	0	0	0	0	0	0	1	0	0	0	0	0	0	0	0	0	0	1	0	0	0	0	0	1	0	1	0	0	0	0	0.2654
[EMIM][MeSO3]	[EMIM]	[MeSO3]	342.45	50.5	1	1	2	2	0	0	0	0	0	0	0	0	0	0	0	0	0	0	0	1	0	0	0	0	0	0	0	0	0	0	1	0	0	0	0	0	1	0	1	0	0	0	0	0.1973
[EMIM][MeSO3]	[EMIM]	[MeSO3]	303.55	48.5	1	1	2	2	0	0	0	0	0	0	0	0	0	0	0	0	0	0	0	1	0	0	0	0	0	0	0	0	0	0	1	0	0	0	0	0	1	0	1	0	0	0	0	0.3243
[EMIM][MeSO3]	[EMIM]	[MeSO3]	313.45	45.5	1	1	2	2	0	0	0	0	0	0	0	0	0	0	0	0	0	0	0	1	0	0	0	0	0	0	0	0	0	0	1	0	0	0	0	0	1	0	1	0	0	0	0	0.2654
[EMIM][MeSO3]	[EMIM]	[MeSO3]	332.65	42.5	1	1	2	2	0	0	0	0	0	0	0	0	0	0	0	0	0	0	0	1	0	0	0	0	0	0	0	0	0	0	1	0	0	0	0	0	1	0	1	0	0	0	0	0.1973
[EMIM][MeSO3]	[EMIM]	[MeSO3]	342.25	37	1	1	2	2	0	0	0	0	0	0	0	0	0	0	0	0	0	0	0	1	0	0	0	0	0	0	0	0	0	0	1	0	0	0	0	0	1	0	1	0	0	0	0	0.1536
[EMIM][MeSO3]	[EMIM]	[MeSO3]	303.35	36	1	1	2	2	0	0	0	0	0	0	0	0	0	0	0	0	0	0	0	1	0	0	0	0	0	0	0	0	0	0	1	0	0	0	0	0	1	0	1	0	0	0	0	0.2654
[EMIM][MeSO3]	[EMIM]	[MeSO3]	323.05	35.5	1	1	2	2	0	0	0	0	0	0	0	0	0	0	0	0	0	0	0	1	0	0	0	0	0	0	0	0	0	0	1	0	0	0	0	0	1	0	1	0	0	0	0	0.1973
[EMIM][MeSO3]	[EMIM]	[MeSO3]	332.55	31.5	1	1	2	2	0	0	0	0	0	0	0	0	0	0	0	0	0	0	0	1	0	0	0	0	0	0	0	0	0	0	1	0	0	0	0	0	1	0	1	0	0	0	0	0.1536
[EMIM][MeSO3]	[EMIM]	[MeSO3]	313.15	29	1	1	2	2	0	0	0	0	0	0	0	0	0	0	0	0	0	0	0	1	0	0	0	0	0	0	0	0	0	0	1	0	0	0	0	0	1	0	1	0	0	0	0	0.1973
[EMIM][MeSO3]	[EMIM]	[MeSO3]	322.25	26	1	1	2	2	0	0	0	0	0	0	0	0	0	0	0	0	0	0	0	1	0	0	0	0	0	0	0	0	0	0	1	0	0	0	0	0	1	0	1	0	0	0	0	0.1536
[EMIM][MeSO3]	[EMIM]	[MeSO3]	342.45	24	1	1	2	2	0	0	0	0	0	0	0	0	0	0	0	0	0	0	0	1	0	0	0	0	0	0	0	0	0	0	1	0	0	0	0	0	1	0	1	0	0	0	0	0.1076
[EMIM][MeSO3]	[EMIM]	[MeSO3]	302.25	23	1	1	2	2	0	0	0	0	0	0	0	0	0	0	0	0	0	0	0	1	0	0	0	0	0	0	0	0	0	0	1	0	0	0	0	0	1	0	1	0	0	0	0	0.1973
[EMIM][MeSO3]	[EMIM]	[MeSO3]	312.45	21.5	1	1	2	2	0	0	0	0	0	0	0	0	0	0	0	0	0	0	0	1	0	0	0	0	0	0	0	0	0	0	1	0	0	0	0	0	1	0	1	0	0	0	0	0.1536
[EMIM][MeSO3]	[EMIM]	[MeSO3]	332.55	20.5	1	1	2	2	0	0	0	0	0	0	0	0	0	0	0	0	0	0	0	1	0	0	0	0	0	0	0	0	0	0	1	0	0	0	0	0	1	0	1	0	0	0	0	0.1076
[EMIM][MeSO3]	[EMIM]	[MeSO3]	303.55	18	1	1	2	2	0	0	0	0	0	0	0	0	0	0	0	0	0	0	0	1	0	0	0	0	0	0	0	0	0	0	1	0	0	0	0	0	1	0	1	0	0	0	0	0.1536
[EMIM][MeSO3]	[EMIM]	[MeSO3]	323.05	17	1	1	2	2	0	0	0	0	0	0	0	0	0	0	0	0	0	0	0	1	0	0	0	0	0	0	0	0	0	0	1	0	0	0	0	0	1	0	1	0	0	0	0	0.1076
[EMIM][MeSO3]	[EMIM]	[MeSO3]	313.15	13.5	1	1	2	2	0	0	0	0	0	0	0	0	0	0	0	0	0	0	0	1	0	0	0	0	0	0	0	0	0	0	1	0	0	0	0	0	1	0	1	0	0	0	0	0.1076
[EMIM][MeSO3]	[EMIM]	[MeSO3]	304.45	11	1	1	2	2	0	0	0	0	0	0	0	0	0	0	0	0	0	0	0	1	0	0	0	0	0	0	0	0	0	0	1	0	0	0	0	0	1	0	1	0	0	0	0	0.1076
[EMIM][MeSO3]	[EMIM]	[MeSO3]	342.35	10	1	1	2	2	0	0	0	0	0	0	0	0	0	0	0	0	0	0	0	1	0	0	0	0	0	0	0	0	0	0	1	0	0	0	0	0	1	0	1	0	0	0	0	0.0556
[EMIM][MeSO3]	[EMIM]	[MeSO3]	332.45	8	1	1	2	2	0	0	0	0	0	0	0	0	0	0	0	0	0	0	0	1	0	0	0	0	0	0	0	0	0	0	1	0	0	0	0	0	1	0	1	0	0	0	0	0.0556
[EMIM][MeSO3]	[EMIM]	[MeSO3]	322.65	6.5	1	1	2	2	0	0	0	0	0	0	0	0	0	0	0	0	0	0	0	1	0	0	0	0	0	0	0	0	0	0	1	0	0	0	0	0	1	0	1	0	0	0	0	0.0556
[EMIM][MeSO3]	[EMIM]	[MeSO3]	313.45	5	1	1	2	2	0	0	0	0	0	0	0	0	0	0	0	0	0	0	0	1	0	0	0	0	0	0	0	0	0	0	1	0	0	0	0	0	1	0	1	0	0	0	0	0.0556
[EMIM][MeSO3]	[EMIM]	[MeSO3]	303.35	4	1	1	2	2	0	0	0	0	0	0	0	0	0	0	0	0	0	0	0	1	0	0	0	0	0	0	0	0	0	0	1	0	0	0	0	0	1	0	1	0	0	0	0	0.0556
[MMIM][MeSO3]	[MMIM]	[MeSO3]	362.35	431	1	1	1	2	0	0	0	0	0	0	0	0	0	0	0	0	0	0	0	1	0	0	0	0	0	0	0	0	0	0	1	0	0	0	0	0	1	0	1	0	0	0	0	0.369
[MMIM][MeSO3]	[MMIM]	[MeSO3]	352.45	403	1	1	1	2	0	0	0	0	0	0	0	0	0	0	0	0	0	0	0	1	0	0	0	0	0	0	0	0	0	0	1	0	0	0	0	0	1	0	1	0	0	0	0	0.369
[MMIM][MeSO3]	[MMIM]	[MeSO3]	343.45	377	1	1	1	2	0	0	0	0	0	0	0	0	0	0	0	0	0	0	0	1	0	0	0	0	0	0	0	0	0	0	1	0	0	0	0	0	1	0	1	0	0	0	0	0.369
[MMIM][MeSO3]	[MMIM]	[MeSO3]	362.25	352	1	1	1	2	0	0	0	0	0	0	0	0	0	0	0	0	0	0	0	1	0	0	0	0	0	0	0	0	0	0	1	0	0	0	0	0	1	0	1	0	0	0	0	0.3493
[MMIM][MeSO3]	[MMIM]	[MeSO3]	333.65	341	1	1	1	2	0	0	0	0	0	0	0	0	0	0	0	0	0	0	0	1	0	0	0	0	0	0	0	0	0	0	1	0	0	0	0	0	1	0	1	0	0	0	0	0.369
[MMIM][MeSO3]	[MMIM]	[MeSO3]	352.35	324.5	1	1	1	2	0	0	0	0	0	0	0	0	0	0	0	0	0	0	0	1	0	0	0	0	0	0	0	0	0	0	1	0	0	0	0	0	1	0	1	0	0	0	0	0.3493
[MMIM][MeSO3]	[MMIM]	[MeSO3]	363.55	298.5	1	1	1	2	0	0	0	0	0	0	0	0	0	0	0	0	0	0	0	1	0	0	0	0	0	0	0	0	0	0	1	0	0	0	0	0	1	0	1	0	0	0	0	0.32
[MMIM][MeSO3]	[MMIM]	[MeSO3]	342.85	295.5	1	1	1	2	0	0	0	0	0	0	0	0	0	0	0	0	0	0	0	1	0	0	0	0	0	0	0	0	0	0	1	0	0	0	0	0	1	0	1	0	0	0	0	0.3493
[MMIM][MeSO3]	[MMIM]	[MeSO3]	353.15	269.5	1	1	1	2	0	0	0	0	0	0	0	0	0	0	0	0	0	0	0	1	0	0	0	0	0	0	0	0	0	0	1	0	0	0	0	0	1	0	1	0	0	0	0	0.32
[MMIM][MeSO3]	[MMIM]	[MeSO3]	334.55	263.5	1	1	1	2	0	0	0	0	0	0	0	0	0	0	0	0	0	0	0	1	0	0	0	0	0	0	0	0	0	0	1	0	0	0	0	0	1	0	1	0	0	0	0	0.3493
[MMIM][MeSO3]	[MMIM]	[MeSO3]	362.85	252	1	1	1	2	0	0	0	0	0	0	0	0	0	0	0	0	0	0	0	1	0	0	0	0	0	0	0	0	0	0	1	0	0	0	0	0	1	0	1	0	0	0	0	0.2929
[MMIM][MeSO3]	[MMIM]	[MeSO3]	343.45	238.5	1	1	1	2	0	0	0	0	0	0	0	0	0	0	0	0	0	0	0	1	0	0	0	0	0	0	0	0	0	0	1	0	0	0	0	0	1	0	1	0	0	0	0	0.32
[MMIM][MeSO3]	[MMIM]	[MeSO3]	353.55	224.5	1	1	1	2	0	0	0	0	0	0	0	0	0	0	0	0	0	0	0	1	0	0	0	0	0	0	0	0	0	0	1	0	0	0	0	0	1	0	1	0	0	0	0	0.2929
[MMIM][MeSO3]	[MMIM]	[MeSO3]	335.25	208.5	1	1	1	2	0	0	0	0	0	0	0	0	0	0	0	0	0	0	0	1	0	0	0	0	0	0	0	0	0	0	1	0	0	0	0	0	1	0	1	0	0	0	0	0.32
[MMIM][MeSO3]	[MMIM]	[MeSO3]	362.65	203	1	1	1	2	0	0	0	0	0	0	0	0	0	0	0	0	0	0	0	1	0	0	0	0	0	0	0	0	0	0	1	0	0	0	0	0	1	0	1	0	0	0	0	0.2608
[MMIM][MeSO3]	[MMIM]	[MeSO3]	343.45	194	1	1	1	2	0	0	0	0	0	0	0	0	0	0	0	0	0	0	0	1	0	0	0	0	0	0	0	0	0	0	1	0	0	0	0	0	1	0	1	0	0	0	0	0.2929
[MMIM][MeSO3]	[MMIM]	[MeSO3]	352.85	179	1	1	1	2	0	0	0	0	0	0	0	0	0	0	0	0	0	0	0	1	0	0	0	0	0	0	0	0	0	0	1	0	0	0	0	0	1	0	1	0	0	0	0	0.2608
[MMIM][MeSO3]	[MMIM]	[MeSO3]	333.15	157	1	1	1	2	0	0	0	0	0	0	0	0	0	0	0	0	0	0	0	1	0	0	0	0	0	0	0	0	0	0	1	0	0	0	0	0	1	0	1	0	0	0	0	0.2929
[MMIM][MeSO3]	[MMIM]	[MeSO3]	342.45	151	1	1	1	2	0	0	0	0	0	0	0	0	0	0	0	0	0	0	0	1	0	0	0	0	0	0	0	0	0	0	1	0	0	0	0	0	1	0	1	0	0	0	0	0.2608
[MMIM][MeSO3]	[MMIM]	[MeSO3]	362.35	143.5	1	1	1	2	0	0	0	0	0	0	0	0	0	0	0	0	0	0	0	1	0	0	0	0	0	0	0	0	0	0	1	0	0	0	0	0	1	0	1	0	0	0	0	0.2289
[MMIM][MeSO3]	[MMIM]	[MeSO3]	353.25	124.5	1	1	1	2	0	0	0	0	0	0	0	0	0	0	0	0	0	0	0	1	0	0	0	0	0	0	0	0	0	0	1	0	0	0	0	0	1	0	1	0	0	0	0	0.2289
[MMIM][MeSO3]	[MMIM]	[MeSO3]	332.85	120	1	1	1	2	0	0	0	0	0	0	0	0	0	0	0	0	0	0	0	1	0	0	0	0	0	0	0	0	0	0	1	0	0	0	0	0	1	0	1	0	0	0	0	0.2608
[MMIM][MeSO3]	[MMIM]	[MeSO3]	362.35	107.5	1	1	1	2	0	0	0	0	0	0	0	0	0	0	0	0	0	0	0	1	0	0	0	0	0	0	0	0	0	0	1	0	0	0	0	0	1	0	1	0	0	0	0	0.2035
[MMIM][MeSO3]	[MMIM]	[MeSO3]	343.55	107	1	1	1	2	0	0	0	0	0	0	0	0	0	0	0	0	0	0	0	1	0	0	0	0	0	0	0	0	0	0	1	0	0	0	0	0	1	0	1	0	0	0	0	0.2289
[MMIM][MeSO3]	[MMIM]	[MeSO3]	352.55	93	1	1	1	2	0	0	0	0	0	0	0	0	0	0	0	0	0	0	0	1	0	0	0	0	0	0	0	0	0	0	1	0	0	0	0	0	1	0	1	0	0	0	0	0.2035
[MMIM][MeSO3]	[MMIM]	[MeSO3]	333.75	89.5	1	1	1	2	0	0	0	0	0	0	0	0	0	0	0	0	0	0	0	1	0	0	0	0	0	0	0	0	0	0	1	0	0	0	0	0	1	0	1	0	0	0	0	0.2289
[MMIM][MeSO3]	[MMIM]	[MeSO3]	363.65	82.5	1	1	1	2	0	0	0	0	0	0	0	0	0	0	0	0	0	0	0	1	0	0	0	0	0	0	0	0	0	0	1	0	0	0	0	0	1	0	1	0	0	0	0	0.1667
[MMIM][MeSO3]	[MMIM]	[MeSO3]	342.75	81	1	1	1	2	0	0	0	0	0	0	0	0	0	0	0	0	0	0	0	1	0	0	0	0	0	0	0	0	0	0	1	0	0	0	0	0	1	0	1	0	0	0	0	0.2035
[MMIM][MeSO3]	[MMIM]	[MeSO3]	352.05	71.5	1	1	1	2	0	0	0	0	0	0	0	0	0	0	0	0	0	0	0	1	0	0	0	0	0	0	0	0	0	0	1	0	0	0	0	0	1	0	1	0	0	0	0	0.1667
[MMIM][MeSO3]	[MMIM]	[MeSO3]	334.05	69	1	1	1	2	0	0	0	0	0	0	0	0	0	0	0	0	0	0	0	1	0	0	0	0	0	0	0	0	0	0	1	0	0	0	0	0	1	0	1	0	0	0	0	0.2035
[MMIM][MeSO3]	[MMIM]	[MeSO3]	342.45	62.5	1	1	1	2	0	0	0	0	0	0	0	0	0	0	0	0	0	0	0	1	0	0	0	0	0	0	0	0	0	0	1	0	0	0	0	0	1	0	1	0	0	0	0	0.1667
[MMIM][MeSO3]	[MMIM]	[MeSO3]	333.25	53.5	1	1	1	2	0	0	0	0	0	0	0	0	0	0	0	0	0	0	0	1	0	0	0	0	0	0	0	0	0	0	1	0	0	0	0	0	1	0	1	0	0	0	0	0.1667
[MMIM][MeSO3]	[MMIM]	[MeSO3]	362.35	51	1	1	1	2	0	0	0	0	0	0	0	0	0	0	0	0	0	0	0	1	0	0	0	0	0	0	0	0	0	0	1	0	0	0	0	0	1	0	1	0	0	0	0	0.1166
[MMIM][MeSO3]	[MMIM]	[MeSO3]	353.35	45.5	1	1	1	2	0	0	0	0	0	0	0	0	0	0	0	0	0	0	0	1	0	0	0	0	0	0	0	0	0	0	1	0	0	0	0	0	1	0	1	0	0	0	0	0.1166
[MMIM][MeSO3]	[MMIM]	[MeSO3]	342.85	39.5	1	1	1	2	0	0	0	0	0	0	0	0	0	0	0	0	0	0	0	1	0	0	0	0	0	0	0	0	0	0	1	0	0	0	0	0	1	0	1	0	0	0	0	0.1166
[MMIM][MeSO3]	[MMIM]	[MeSO3]	333.65	34	1	1	1	2	0	0	0	0	0	0	0	0	0	0	0	0	0	0	0	1	0	0	0	0	0	0	0	0	0	0	1	0	0	0	0	0	1	0	1	0	0	0	0	0.1166
[MMIM][MeSO3]	[MMIM]	[MeSO3]	362.95	23	1	1	1	2	0	0	0	0	0	0	0	0	0	0	0	0	0	0	0	1	0	0	0	0	0	0	0	0	0	0	1	0	0	0	0	0	1	0	1	0	0	0	0	0.0629
[MMIM][MeSO3]	[MMIM]	[MeSO3]	354.25	20.5	1	1	1	2	0	0	0	0	0	0	0	0	0	0	0	0	0	0	0	1	0	0	0	0	0	0	0	0	0	0	1	0	0	0	0	0	1	0	1	0	0	0	0	0.0629
[MMIM][MeSO3]	[MMIM]	[MeSO3]	344.25	18	1	1	1	2	0	0	0	0	0	0	0	0	0	0	0	0	0	0	0	1	0	0	0	0	0	0	0	0	0	0	1	0	0	0	0	0	1	0	1	0	0	0	0	0.0629
[MMIM][MeSO3]	[MMIM]	[MeSO3]	334.45	16.5	1	1	1	2	0	0	0	0	0	0	0	0	0	0	0	0	0	0	0	1	0	0	0	0	0	0	0	0	0	0	1	0	0	0	0	0	1	0	1	0	0	0	0	0.0629
[BMIM][BF4]	[BMIM]	[BF4]	344.49	0.8443	1	1	4	2	0	0	0	0	0	0	0	0	0	0	0	0	0	0	0	1	0	1	0	0	0	0	0	0	0	0	0	0	1	0	0	0	4	0	0	0	0	0	0	0.00971
[BMIM][BF4]	[BMIM]	[BF4]	334.38	0.8188	1	1	4	2	0	0	0	0	0	0	0	0	0	0	0	0	0	0	0	1	0	1	0	0	0	0	0	0	0	0	0	0	1	0	0	0	4	0	0	0	0	0	0	0.00977
[BMIM][BF4]	[BMIM]	[BF4]	324.12	0.7847	1	1	4	2	0	0	0	0	0	0	0	0	0	0	0	0	0	0	0	1	0	1	0	0	0	0	0	0	0	0	0	0	1	0	0	0	4	0	0	0	0	0	0	0.011
[BMIM][BF4]	[BMIM]	[BF4]	303.72	0.7724	1	1	4	2	0	0	0	0	0	0	0	0	0	0	0	0	0	0	0	1	0	1	0	0	0	0	0	0	0	0	0	0	1	0	0	0	4	0	0	0	0	0	0	0.0127
[BMIM][BF4]	[BMIM]	[BF4]	313.89	0.756	1	1	4	2	0	0	0	0	0	0	0	0	0	0	0	0	0	0	0	1	0	1	0	0	0	0	0	0	0	0	0	0	1	0	0	0	4	0	0	0	0	0	0	0.0122
[BMIM][BF4]	[BMIM]	[BF4]	303.72	0.726	1	1	4	2	0	0	0	0	0	0	0	0	0	0	0	0	0	0	0	1	0	1	0	0	0	0	0	0	0	0	0	0	1	0	0	0	4	0	0	0	0	0	0	0.0133
[BMIM][BF4]	[BMIM]	[BF4]	344.49	0.4497	1	1	4	2	0	0	0	0	0	0	0	0	0	0	0	0	0	0	0	1	0	1	0	0	0	0	0	0	0	0	0	0	1	0	0	0	4	0	0	0	0	0	0	0.00511
[BMIM][BF4]	[BMIM]	[BF4]	334.38	0.4355	1	1	4	2	0	0	0	0	0	0	0	0	0	0	0	0	0	0	0	1	0	1	0	0	0	0	0	0	0	0	0	0	1	0	0	0	4	0	0	0	0	0	0	0.00536
[BMIM][BF4]	[BMIM]	[BF4]	344.49	0.4267	1	1	4	2	0	0	0	0	0	0	0	0	0	0	0	0	0	0	0	1	0	1	0	0	0	0	0	0	0	0	0	0	1	0	0	0	4	0	0	0	0	0	0	0.00474
[BMIM][BF4]	[BMIM]	[BF4]	324.12	0.4212	1	1	4	2	0	0	0	0	0	0	0	0	0	0	0	0	0	0	0	1	0	1	0	0	0	0	0	0	0	0	0	0	1	0	0	0	4	0	0	0	0	0	0	0.00559
[BMIM][BF4]	[BMIM]	[BF4]	334.38	0.4134	1	1	4	2	0	0	0	0	0	0	0	0	0	0	0	0	0	0	0	1	0	1	0	0	0	0	0	0	0	0	0	0	1	0	0	0	4	0	0	0	0	0	0	0.00489
[BMIM][BF4]	[BMIM]	[BF4]	313.89	0.4065	1	1	4	2	0	0	0	0	0	0	0	0	0	0	0	0	0	0	0	1	0	1	0	0	0	0	0	0	0	0	0	0	1	0	0	0	4	0	0	0	0	0	0	0.00594
[BMIM][BF4]	[BMIM]	[BF4]	324.12	0.3999	1	1	4	2	0	0	0	0	0	0	0	0	0	0	0	0	0	0	0	1	0	1	0	0	0	0	0	0	0	0	0	0	1	0	0	0	4	0	0	0	0	0	0	0.00508
[BMIM][BF4]	[BMIM]	[BF4]	303.72	0.3914	1	1	4	2	0	0	0	0	0	0	0	0	0	0	0	0	0	0	0	1	0	1	0	0	0	0	0	0	0	0	0	0	1	0	0	0	4	0	0	0	0	0	0	0.00652
[BMIM][BF4]	[BMIM]	[BF4]	313.89	0.386	1	1	4	2	0	0	0	0	0	0	0	0	0	0	0	0	0	0	0	1	0	1	0	0	0	0	0	0	0	0	0	0	1	0	0	0	4	0	0	0	0	0	0	0.00543
[BMIM][BF4]	[BMIM]	[BF4]	303.72	0.3721	1	1	4	2	0	0	0	0	0	0	0	0	0	0	0	0	0	0	0	1	0	1	0	0	0	0	0	0	0	0	0	0	1	0	0	0	4	0	0	0	0	0	0	0.00581
[BMIM][BF4]	[BMIM]	[BF4]	344.49	0.2033	1	1	4	2	0	0	0	0	0	0	0	0	0	0	0	0	0	0	0	1	0	1	0	0	0	0	0	0	0	0	0	0	1	0	0	0	4	0	0	0	0	0	0	0.00236
[BMIM][BF4]	[BMIM]	[BF4]	334.38	0.197	1	1	4	2	0	0	0	0	0	0	0	0	0	0	0	0	0	0	0	1	0	1	0	0	0	0	0	0	0	0	0	0	1	0	0	0	4	0	0	0	0	0	0	0.00243
[BMIM][BF4]	[BMIM]	[BF4]	324.12	0.1906	1	1	4	2	0	0	0	0	0	0	0	0	0	0	0	0	0	0	0	1	0	1	0	0	0	0	0	0	0	0	0	0	1	0	0	0	4	0	0	0	0	0	0	0.00255
[BMIM][BF4]	[BMIM]	[BF4]	313.89	0.184	1	1	4	2	0	0	0	0	0	0	0	0	0	0	0	0	0	0	0	1	0	1	0	0	0	0	0	0	0	0	0	0	1	0	0	0	4	0	0	0	0	0	0	0.00271
[BMIM][BF4]	[BMIM]	[BF4]	303.72	0.1773	1	1	4	2	0	0	0	0	0	0	0	0	0	0	0	0	0	0	0	1	0	1	0	0	0	0	0	0	0	0	0	0	1	0	0	0	4	0	0	0	0	0	0	0.00295
[BMIM][BF4]	[BMIM]	[BF4]	333.3	85	1	1	4	2	0	0	0	0	0	0	0	0	0	0	0	0	0	0	0	1	0	1	0	0	0	0	0	0	0	0	0	0	1	0	0	0	4	0	0	0	0	0	0	0.4483
[BMIM][BF4]	[BMIM]	[BF4]	313.3	84.02	1	1	4	2	0	0	0	0	0	0	0	0	0	0	0	0	0	0	0	1	0	1	0	0	0	0	0	0	0	0	0	0	1	0	0	0	4	0	0	0	0	0	0	0.5289
[BMIM][BF4]	[BMIM]	[BF4]	313.3	74.24	1	1	4	2	0	0	0	0	0	0	0	0	0	0	0	0	0	0	0	1	0	1	0	0	0	0	0	0	0	0	0	0	1	0	0	0	4	0	0	0	0	0	0	0.4826
[BMIM][BF4]	[BMIM]	[BF4]	333.3	72.32	1	1	4	2	0	0	0	0	0	0	0	0	0	0	0	0	0	0	0	1	0	1	0	0	0	0	0	0	0	0	0	0	1	0	0	0	4	0	0	0	0	0	0	0.3765
[BMIM][BF4]	[BMIM]	[BF4]	313.3	63.17	1	1	4	2	0	0	0	0	0	0	0	0	0	0	0	0	0	0	0	1	0	1	0	0	0	0	0	0	0	0	0	0	1	0	0	0	4	0	0	0	0	0	0	0.4475
[BMIM][BF4]	[BMIM]	[BF4]	333.3	60.96	1	1	4	2	0	0	0	0	0	0	0	0	0	0	0	0	0	0	0	1	0	1	0	0	0	0	0	0	0	0	0	0	1	0	0	0	4	0	0	0	0	0	0	0.3173
[BMIM][BF4]	[BMIM]	[BF4]	313.3	52.78	1	1	4	2	0	0	0	0	0	0	0	0	0	0	0	0	0	0	0	1	0	1	0	0	0	0	0	0	0	0	0	0	1	0	0	0	4	0	0	0	0	0	0	0.4004
[BMIM][BF4]	[BMIM]	[BF4]	298.2	51.21	1	1	4	2	0	0	0	0	0	0	0	0	0	0	0	0	0	0	0	1	0	1	0	0	0	0	0	0	0	0	0	0	1	0	0	0	4	0	0	0	0	0	0	0.5138
[BMIM][BF4]	[BMIM]	[BF4]	333.3	48.6	1	1	4	2	0	0	0	0	0	0	0	0	0	0	0	0	0	0	0	1	0	1	0	0	0	0	0	0	0	0	0	0	1	0	0	0	4	0	0	0	0	0	0	0.266
[BMIM][BF4]	[BMIM]	[BF4]	298.2	42.1	1	1	4	2	0	0	0	0	0	0	0	0	0	0	0	0	0	0	0	1	0	1	0	0	0	0	0	0	0	0	0	0	1	0	0	0	4	0	0	0	0	0	0	0.4902
[BMIM][BF4]	[BMIM]	[BF4]	313.3	41.7	1	1	4	2	0	0	0	0	0	0	0	0	0	0	0	0	0	0	0	1	0	1	0	0	0	0	0	0	0	0	0	0	1	0	0	0	4	0	0	0	0	0	0	0.3489
[BMIM][BF4]	[BMIM]	[BF4]	333.3	35.01	1	1	4	2	0	0	0	0	0	0	0	0	0	0	0	0	0	0	0	1	0	1	0	0	0	0	0	0	0	0	0	0	1	0	0	0	4	0	0	0	0	0	0	0.2045
[BMIM][BF4]	[BMIM]	[BF4]	298.2	31.83	1	1	4	2	0	0	0	0	0	0	0	0	0	0	0	0	0	0	0	1	0	1	0	0	0	0	0	0	0	0	0	0	1	0	0	0	4	0	0	0	0	0	0	0.4112
[BMIM][BF4]	[BMIM]	[BF4]	313.3	31.44	1	1	4	2	0	0	0	0	0	0	0	0	0	0	0	0	0	0	0	1	0	1	0	0	0	0	0	0	0	0	0	0	1	0	0	0	4	0	0	0	0	0	0	0.2863
[BMIM][BF4]	[BMIM]	[BF4]	333.3	24.56	1	1	4	2	0	0	0	0	0	0	0	0	0	0	0	0	0	0	0	1	0	1	0	0	0	0	0	0	0	0	0	0	1	0	0	0	4	0	0	0	0	0	0	0.1456
[BMIM][BF4]	[BMIM]	[BF4]	298.2	22.25	1	1	4	2	0	0	0	0	0	0	0	0	0	0	0	0	0	0	0	1	0	1	0	0	0	0	0	0	0	0	0	0	1	0	0	0	4	0	0	0	0	0	0	0.3188
[BMIM][BF4]	[BMIM]	[BF4]	313.3	22.05	1	1	4	2	0	0	0	0	0	0	0	0	0	0	0	0	0	0	0	1	0	1	0	0	0	0	0	0	0	0	0	0	1	0	0	0	4	0	0	0	0	0	0	0.2226
[BMIM][BF4]	[BMIM]	[BF4]	333.3	14.22	1	1	4	2	0	0	0	0	0	0	0	0	0	0	0	0	0	0	0	1	0	1	0	0	0	0	0	0	0	0	0	0	1	0	0	0	4	0	0	0	0	0	0	0.0928
[BMIM][BF4]	[BMIM]	[BF4]	313.3	12.74	1	1	4	2	0	0	0	0	0	0	0	0	0	0	0	0	0	0	0	1	0	1	0	0	0	0	0	0	0	0	0	0	1	0	0	0	4	0	0	0	0	0	0	0.137
[BMIM][BF4]	[BMIM]	[BF4]	298.2	12.09	1	1	4	2	0	0	0	0	0	0	0	0	0	0	0	0	0	0	0	1	0	1	0	0	0	0	0	0	0	0	0	0	1	0	0	0	4	0	0	0	0	0	0	0.1928
[BMIM][DCA]	[BMIM]	[DCA]	313.3	115.29	1	1	4	2	0	0	0	0	0	0	0	0	0	0	0	0	0	0	0	1	0	0	0	1	0	0	0	0	0	0	0	0	0	1	0	0	2	0	0	0	0	0	0	0.5636
[BMIM][DCA]	[BMIM]	[DCA]	333.3	114.84	1	1	4	2	0	0	0	0	0	0	0	0	0	0	0	0	0	0	0	1	0	0	0	1	0	0	0	0	0	0	0	0	0	1	0	0	2	0	0	0	0	0	0	0.5264
[BMIM][DCA]	[BMIM]	[DCA]	333.3	97.45	1	1	4	2	0	0	0	0	0	0	0	0	0	0	0	0	0	0	0	1	0	0	0	1	0	0	0	0	0	0	0	0	0	1	0	0	2	0	0	0	0	0	0	0.4976
[BMIM][DCA]	[BMIM]	[DCA]	313.3	95.34	1	1	4	2	0	0	0	0	0	0	0	0	0	0	0	0	0	0	0	1	0	0	0	1	0	0	0	0	0	0	0	0	0	1	0	0	2	0	0	0	0	0	0	0.5565
[BMIM][DCA]	[BMIM]	[DCA]	333.3	83.9	1	1	4	2	0	0	0	0	0	0	0	0	0	0	0	0	0	0	0	1	0	0	0	1	0	0	0	0	0	0	0	0	0	1	0	0	2	0	0	0	0	0	0	0.458
[BMIM][DCA]	[BMIM]	[DCA]	313.3	83.68	1	1	4	2	0	0	0	0	0	0	0	0	0	0	0	0	0	0	0	1	0	0	0	1	0	0	0	0	0	0	0	0	0	1	0	0	2	0	0	0	0	0	0	0.5207
[BMIM][DCA]	[BMIM]	[DCA]	313.3	70.17	1	1	4	2	0	0	0	0	0	0	0	0	0	0	0	0	0	0	0	1	0	0	0	1	0	0	0	0	0	0	0	0	0	1	0	0	2	0	0	0	0	0	0	0.474
[BMIM][DCA]	[BMIM]	[DCA]	333.3	69.96	1	1	4	2	0	0	0	0	0	0	0	0	0	0	0	0	0	0	0	1	0	0	0	1	0	0	0	0	0	0	0	0	0	1	0	0	2	0	0	0	0	0	0	0.3984
[BMIM][DCA]	[BMIM]	[DCA]	298.2	59.43	1	1	4	2	0	0	0	0	0	0	0	0	0	0	0	0	0	0	0	1	0	0	0	1	0	0	0	0	0	0	0	0	0	1	0	0	2	0	0	0	0	0	0	0.5149
[BMIM][DCA]	[BMIM]	[DCA]	333.3	56.45	1	1	4	2	0	0	0	0	0	0	0	0	0	0	0	0	0	0	0	1	0	0	0	1	0	0	0	0	0	0	0	0	0	1	0	0	2	0	0	0	0	0	0	0.3466
[BMIM][DCA]	[BMIM]	[DCA]	313.3	56.32	1	1	4	2	0	0	0	0	0	0	0	0	0	0	0	0	0	0	0	1	0	0	0	1	0	0	0	0	0	0	0	0	0	1	0	0	2	0	0	0	0	0	0	0.4117
[BMIM][DCA]	[BMIM]	[DCA]	298.2	44.29	1	1	4	2	0	0	0	0	0	0	0	0	0	0	0	0	0	0	0	1	0	0	0	1	0	0	0	0	0	0	0	0	0	1	0	0	2	0	0	0	0	0	0	0.4365
[BMIM][DCA]	[BMIM]	[DCA]	313.2	42.86	1	1	4	2	0	0	0	0	0	0	0	0	0	0	0	0	0	0	0	1	0	0	0	1	0	0	0	0	0	0	0	0	0	1	0	0	2	0	0	0	0	0	0	0.3532
[BMIM][DCA]	[BMIM]	[DCA]	333.3	42.17	1	1	4	2	0	0	0	0	0	0	0	0	0	0	0	0	0	0	0	1	0	0	0	1	0	0	0	0	0	0	0	0	0	1	0	0	2	0	0	0	0	0	0	0.2849
[BMIM][DCA]	[BMIM]	[DCA]	298.2	34.84	1	1	4	2	0	0	0	0	0	0	0	0	0	0	0	0	0	0	0	1	0	0	0	1	0	0	0	0	0	0	0	0	0	1	0	0	2	0	0	0	0	0	0	0.3781
[BMIM][DCA]	[BMIM]	[DCA]	333.2	28.88	1	1	4	2	0	0	0	0	0	0	0	0	0	0	0	0	0	0	0	1	0	0	0	1	0	0	0	0	0	0	0	0	0	1	0	0	2	0	0	0	0	0	0	0.2181
[BMIM][DCA]	[BMIM]	[DCA]	313.3	28.29	1	1	4	2	0	0	0	0	0	0	0	0	0	0	0	0	0	0	0	1	0	0	0	1	0	0	0	0	0	0	0	0	0	1	0	0	2	0	0	0	0	0	0	0.2575
[BMIM][DCA]	[BMIM]	[DCA]	298.2	24.86	1	1	4	2	0	0	0	0	0	0	0	0	0	0	0	0	0	0	0	1	0	0	0	1	0	0	0	0	0	0	0	0	0	1	0	0	2	0	0	0	0	0	0	0.2886
[BMIM][DCA]	[BMIM]	[DCA]	333.3	18.3	1	1	4	2	0	0	0	0	0	0	0	0	0	0	0	0	0	0	0	1	0	0	0	1	0	0	0	0	0	0	0	0	0	1	0	0	2	0	0	0	0	0	0	0.1543
[BMIM][DCA]	[BMIM]	[DCA]	313.3	14.16	1	1	4	2	0	0	0	0	0	0	0	0	0	0	0	0	0	0	0	1	0	0	0	1	0	0	0	0	0	0	0	0	0	1	0	0	2	0	0	0	0	0	0	0.1582
[BMIM][DCA]	[BMIM]	[DCA]	298.2	12.71	1	1	4	2	0	0	0	0	0	0	0	0	0	0	0	0	0	0	0	1	0	0	0	1	0	0	0	0	0	0	0	0	0	1	0	0	2	0	0	0	0	0	0	0.1598
[BMIM][methide]	[BMIM]	[methide]	313.3	114.27	1	1	4	2	0	0	0	0	0	0	0	0	0	0	0	0	0	0	0	1	0	0	0	0	0	0	0	0	0	0	0	0	0	0	0	0	3	0	0	0	0	0	1	0.774
[BMIM][methide]	[BMIM]	[methide]	333.3	111.16	1	1	4	2	0	0	0	0	0	0	0	0	0	0	0	0	0	0	0	1	0	0	0	0	0	0	0	0	0	0	0	0	0	0	0	0	3	0	0	0	0	0	1	0.7401
[BMIM][methide]	[BMIM]	[methide]	333.3	99.01	1	1	4	2	0	0	0	0	0	0	0	0	0	0	0	0	0	0	0	1	0	0	0	0	0	0	0	0	0	0	0	0	0	0	0	0	3	0	0	0	0	0	1	0.7067
[BMIM][methide]	[BMIM]	[methide]	313.2	98.26	1	1	4	2	0	0	0	0	0	0	0	0	0	0	0	0	0	0	0	1	0	0	0	0	0	0	0	0	0	0	0	0	0	0	0	0	3	0	0	0	0	0	1	0.7652
[BMIM][methide]	[BMIM]	[methide]	333.3	83.8	1	1	4	2	0	0	0	0	0	0	0	0	0	0	0	0	0	0	0	1	0	0	0	0	0	0	0	0	0	0	0	0	0	0	0	0	3	0	0	0	0	0	1	0.6702
[BMIM][methide]	[BMIM]	[methide]	313.2	83.66	1	1	4	2	0	0	0	0	0	0	0	0	0	0	0	0	0	0	0	1	0	0	0	0	0	0	0	0	0	0	0	0	0	0	0	0	3	0	0	0	0	0	1	0.7379
[BMIM][methide]	[BMIM]	[methide]	333.3	70.47	1	1	4	2	0	0	0	0	0	0	0	0	0	0	0	0	0	0	0	1	0	0	0	0	0	0	0	0	0	0	0	0	0	0	0	0	3	0	0	0	0	0	1	0.624
[BMIM][methide]	[BMIM]	[methide]	313.2	70.29	1	1	4	2	0	0	0	0	0	0	0	0	0	0	0	0	0	0	0	1	0	0	0	0	0	0	0	0	0	0	0	0	0	0	0	0	3	0	0	0	0	0	1	0.6946
[BMIM][methide]	[BMIM]	[methide]	298.3	61.73	1	1	4	2	0	0	0	0	0	0	0	0	0	0	0	0	0	0	0	1	0	0	0	0	0	0	0	0	0	0	0	0	0	0	0	0	3	0	0	0	0	0	1	0.741
[BMIM][methide]	[BMIM]	[methide]	333.3	58.12	1	1	4	2	0	0	0	0	0	0	0	0	0	0	0	0	0	0	0	1	0	0	0	0	0	0	0	0	0	0	0	0	0	0	0	0	3	0	0	0	0	0	1	0.5706
[BMIM][methide]	[BMIM]	[methide]	313.2	57.58	1	1	4	2	0	0	0	0	0	0	0	0	0	0	0	0	0	0	0	1	0	0	0	0	0	0	0	0	0	0	0	0	0	0	0	0	3	0	0	0	0	0	1	0.6387
[BMIM][methide]	[BMIM]	[methide]	333.3	46.49	1	1	4	2	0	0	0	0	0	0	0	0	0	0	0	0	0	0	0	1	0	0	0	0	0	0	0	0	0	0	0	0	0	0	0	0	3	0	0	0	0	0	1	0.5015
[BMIM][methide]	[BMIM]	[methide]	313.2	44.62	1	1	4	2	0	0	0	0	0	0	0	0	0	0	0	0	0	0	0	1	0	0	0	0	0	0	0	0	0	0	0	0	0	0	0	0	3	0	0	0	0	0	1	0.5648
[BMIM][methide]	[BMIM]	[methide]	298.2	41.98	1	1	4	2	0	0	0	0	0	0	0	0	0	0	0	0	0	0	0	1	0	0	0	0	0	0	0	0	0	0	0	0	0	0	0	0	3	0	0	0	0	0	1	0.6485
[BMIM][methide]	[BMIM]	[methide]	313.2	32.76	1	1	4	2	0	0	0	0	0	0	0	0	0	0	0	0	0	0	0	1	0	0	0	0	0	0	0	0	0	0	0	0	0	0	0	0	3	0	0	0	0	0	1	0.4828
[BMIM][methide]	[BMIM]	[methide]	333.3	32.32	1	1	4	2	0	0	0	0	0	0	0	0	0	0	0	0	0	0	0	1	0	0	0	0	0	0	0	0	0	0	0	0	0	0	0	0	3	0	0	0	0	0	1	0.4106
[BMIM][methide]	[BMIM]	[methide]	298.2	31.36	1	1	4	2	0	0	0	0	0	0	0	0	0	0	0	0	0	0	0	1	0	0	0	0	0	0	0	0	0	0	0	0	0	0	0	0	3	0	0	0	0	0	1	0.5665
[BMIM][methide]	[BMIM]	[methide]	298.2	20.72	1	1	4	2	0	0	0	0	0	0	0	0	0	0	0	0	0	0	0	1	0	0	0	0	0	0	0	0	0	0	0	0	0	0	0	0	3	0	0	0	0	0	1	0.4844
[BMIM][methide]	[BMIM]	[methide]	313.2	18.75	1	1	4	2	0	0	0	0	0	0	0	0	0	0	0	0	0	0	0	1	0	0	0	0	0	0	0	0	0	0	0	0	0	0	0	0	3	0	0	0	0	0	1	0.3153
[BMIM][methide]	[BMIM]	[methide]	333.3	17.12	1	1	4	2	0	0	0	0	0	0	0	0	0	0	0	0	0	0	0	1	0	0	0	0	0	0	0	0	0	0	0	0	0	0	0	0	3	0	0	0	0	0	1	0.277
[BMIM][methide]	[BMIM]	[methide]	298.2	12.58	1	1	4	2	0	0	0	0	0	0	0	0	0	0	0	0	0	0	0	1	0	0	0	0	0	0	0	0	0	0	0	0	0	0	0	0	3	0	0	0	0	0	1	0.3672
[BMIM][NO3]	[BMIM]	[NO3]	313.2	93.16	1	1	4	2	0	0	0	0	0	0	0	0	0	0	0	0	0	0	0	1	0	0	0	1	0	0	0	0	0	0	0	0	0	0	1	0	3	0	0	0	0	0	0	0.4704
[BMIM][NO3]	[BMIM]	[NO3]	333.1	88.92	1	1	4	2	0	0	0	0	0	0	0	0	0	0	0	0	0	0	0	1	0	0	0	1	0	0	0	0	0	0	0	0	0	0	1	0	3	0	0	0	0	0	0	0.4163
[BMIM][NO3]	[BMIM]	[NO3]	313.3	70.99	1	1	4	2	0	0	0	0	0	0	0	0	0	0	0	0	0	0	0	1	0	0	0	1	0	0	0	0	0	0	0	0	0	0	1	0	3	0	0	0	0	0	0	0.3902
[BMIM][NO3]	[BMIM]	[NO3]	333.1	70.27	1	1	4	2	0	0	0	0	0	0	0	0	0	0	0	0	0	0	0	1	0	0	0	1	0	0	0	0	0	0	0	0	0	0	1	0	3	0	0	0	0	0	0	0.3224
[BMIM][NO3]	[BMIM]	[NO3]	333.1	56.43	1	1	4	2	0	0	0	0	0	0	0	0	0	0	0	0	0	0	0	1	0	0	0	1	0	0	0	0	0	0	0	0	0	0	1	0	3	0	0	0	0	0	0	0.267
[BMIM][NO3]	[BMIM]	[NO3]	313.3	56.23	1	1	4	2	0	0	0	0	0	0	0	0	0	0	0	0	0	0	0	1	0	0	0	1	0	0	0	0	0	0	0	0	0	0	1	0	3	0	0	0	0	0	0	0.3295
[BMIM][NO3]	[BMIM]	[NO3]	298.2	56.21	1	1	4	2	0	0	0	0	0	0	0	0	0	0	0	0	0	0	0	1	0	0	0	1	0	0	0	0	0	0	0	0	0	0	1	0	3	0	0	0	0	0	0	0.4073
[BMIM][NO3]	[BMIM]	[NO3]	298.2	42	1	1	4	2	0	0	0	0	0	0	0	0	0	0	0	0	0	0	0	1	0	0	0	1	0	0	0	0	0	0	0	0	0	0	1	0	3	0	0	0	0	0	0	0.331
[BMIM][NO3]	[BMIM]	[NO3]	333.1	41.53	1	1	4	2	0	0	0	0	0	0	0	0	0	0	0	0	0	0	0	1	0	0	0	1	0	0	0	0	0	0	0	0	0	0	1	0	3	0	0	0	0	0	0	0.2058
[BMIM][NO3]	[BMIM]	[NO3]	313.3	40.69	1	1	4	2	0	0	0	0	0	0	0	0	0	0	0	0	0	0	0	1	0	0	0	1	0	0	0	0	0	0	0	0	0	0	1	0	3	0	0	0	0	0	0	0.2595
[BMIM][NO3]	[BMIM]	[NO3]	298.2	29.51	1	1	4	2	0	0	0	0	0	0	0	0	0	0	0	0	0	0	0	1	0	0	0	1	0	0	0	0	0	0	0	0	0	0	1	0	3	0	0	0	0	0	0	0.2479
[BMIM][NO3]	[BMIM]	[NO3]	313.3	26.98	1	1	4	2	0	0	0	0	0	0	0	0	0	0	0	0	0	0	0	1	0	0	0	1	0	0	0	0	0	0	0	0	0	0	1	0	3	0	0	0	0	0	0	0.1868
[BMIM][NO3]	[BMIM]	[NO3]	333.2	26.92	1	1	4	2	0	0	0	0	0	0	0	0	0	0	0	0	0	0	0	1	0	0	0	1	0	0	0	0	0	0	0	0	0	0	1	0	3	0	0	0	0	0	0	0.133
[BMIM][NO3]	[BMIM]	[NO3]	298.2	19.62	1	1	4	2	0	0	0	0	0	0	0	0	0	0	0	0	0	0	0	1	0	0	0	1	0	0	0	0	0	0	0	0	0	0	1	0	3	0	0	0	0	0	0	0.1807
[BMIM][NO3]	[BMIM]	[NO3]	333.1	13.11	1	1	4	2	0	0	0	0	0	0	0	0	0	0	0	0	0	0	0	1	0	0	0	1	0	0	0	0	0	0	0	0	0	0	1	0	3	0	0	0	0	0	0	0.0692
[BMIM][NO3]	[BMIM]	[NO3]	313.3	12.8	1	1	4	2	0	0	0	0	0	0	0	0	0	0	0	0	0	0	0	1	0	0	0	1	0	0	0	0	0	0	0	0	0	0	1	0	3	0	0	0	0	0	0	0.1038
[BMIM][NO3]	[BMIM]	[NO3]	298.2	10.31	1	1	4	2	0	0	0	0	0	0	0	0	0	0	0	0	0	0	0	1	0	0	0	1	0	0	0	0	0	0	0	0	0	0	1	0	3	0	0	0	0	0	0	0.0992
[BMIM][PF6]	[BMIM]	[PF6]	313.3	146.39	1	1	4	2	0	0	0	0	0	0	0	0	0	0	0	0	0	0	0	1	0	0	0	0	1	0	0	0	0	0	0	0	1	0	0	0	6	0	0	0	0	0	0	0.6503
[BMIM][PF6]	[BMIM]	[PF6]	333.3	132.37	1	1	4	2	0	0	0	0	0	0	0	0	0	0	0	0	0	0	0	1	0	0	0	0	1	0	0	0	0	0	0	0	1	0	0	0	6	0	0	0	0	0	0	0.5552
[BMIM][PF6]	[BMIM]	[PF6]	313.3	128.15	1	1	4	2	0	0	0	0	0	0	0	0	0	0	0	0	0	0	0	1	0	0	0	0	1	0	0	0	0	0	0	0	1	0	0	0	6	0	0	0	0	0	0	0.6466
[BMIM][PF6]	[BMIM]	[PF6]	333.3	121.97	1	1	4	2	0	0	0	0	0	0	0	0	0	0	0	0	0	0	0	1	0	0	0	0	1	0	0	0	0	0	0	0	1	0	0	0	6	0	0	0	0	0	0	0.5331
[BMIM][PF6]	[BMIM]	[PF6]	313.3	112.19	1	1	4	2	0	0	0	0	0	0	0	0	0	0	0	0	0	0	0	1	0	0	0	0	1	0	0	0	0	0	0	0	1	0	0	0	6	0	0	0	0	0	0	0.6314
[BMIM][PF6]	[BMIM]	[PF6]	333.3	104.5	1	1	4	2	0	0	0	0	0	0	0	0	0	0	0	0	0	0	0	1	0	0	0	0	1	0	0	0	0	0	0	0	1	0	0	0	6	0	0	0	0	0	0	0.513
[BMIM][PF6]	[BMIM]	[PF6]	313.3	95.47	1	1	4	2	0	0	0	0	0	0	0	0	0	0	0	0	0	0	0	1	0	0	0	0	1	0	0	0	0	0	0	0	1	0	0	0	6	0	0	0	0	0	0	0.5991
[BMIM][PF6]	[BMIM]	[PF6]	313.3	87.4	1	1	4	2	0	0	0	0	0	0	0	0	0	0	0	0	0	0	0	1	0	0	0	0	1	0	0	0	0	0	0	0	1	0	0	0	6	0	0	0	0	0	0	0.6265
[BMIM][PF6]	[BMIM]	[PF6]	333.3	87.18	1	1	4	2	0	0	0	0	0	0	0	0	0	0	0	0	0	0	0	1	0	0	0	0	1	0	0	0	0	0	0	0	1	0	0	0	6	0	0	0	0	0	0	0.4838
[BMIM][PF6]	[BMIM]	[PF6]	313.3	87.13	1	1	4	2	0	0	0	0	0	0	0	0	0	0	0	0	0	0	0	1	0	0	0	0	1	0	0	0	0	0	0	0	1	0	0	0	6	0	0	0	0	0	0	0.6359
[BMIM][PF6]	[BMIM]	[PF6]	313.3	85.19	1	1	4	2	0	0	0	0	0	0	0	0	0	0	0	0	0	0	0	1	0	0	0	0	1	0	0	0	0	0	0	0	1	0	0	0	6	0	0	0	0	0	0	0.6113
[BMIM][PF6]	[BMIM]	[PF6]	313.3	84.01	1	1	4	2	0	0	0	0	0	0	0	0	0	0	0	0	0	0	0	1	0	0	0	0	1	0	0	0	0	0	0	0	1	0	0	0	6	0	0	0	0	0	0	0.5941
[BMIM][PF6]	[BMIM]	[PF6]	313.3	80.31	1	1	4	2	0	0	0	0	0	0	0	0	0	0	0	0	0	0	0	1	0	0	0	0	1	0	0	0	0	0	0	0	1	0	0	0	6	0	0	0	0	0	0	0.5799
[BMIM][PF6]	[BMIM]	[PF6]	333.4	76.74	1	1	4	2	0	0	0	0	0	0	0	0	0	0	0	0	0	0	0	1	0	0	0	0	1	0	0	0	0	0	0	0	1	0	0	0	6	0	0	0	0	0	0	0.4405
[BMIM][PF6]	[BMIM]	[PF6]	333.3	76.26	1	1	4	2	0	0	0	0	0	0	0	0	0	0	0	0	0	0	0	1	0	0	0	0	1	0	0	0	0	0	0	0	1	0	0	0	6	0	0	0	0	0	0	0.4883
[BMIM][PF6]	[BMIM]	[PF6]	313.3	75.09	1	1	4	2	0	0	0	0	0	0	0	0	0	0	0	0	0	0	0	1	0	0	0	0	1	0	0	0	0	0	0	0	1	0	0	0	6	0	0	0	0	0	0	0.558
[BMIM][PF6]	[BMIM]	[PF6]	333.3	75.05	1	1	4	2	0	0	0	0	0	0	0	0	0	0	0	0	0	0	0	1	0	0	0	0	1	0	0	0	0	0	0	0	1	0	0	0	6	0	0	0	0	0	0	0.4583
[BMIM][PF6]	[BMIM]	[PF6]	313.3	73.3	1	1	4	2	0	0	0	0	0	0	0	0	0	0	0	0	0	0	0	1	0	0	0	0	1	0	0	0	0	0	0	0	1	0	0	0	6	0	0	0	0	0	0	0.5691
[BMIM][PF6]	[BMIM]	[PF6]	333.2	72.7	1	1	4	2	0	0	0	0	0	0	0	0	0	0	0	0	0	0	0	1	0	0	0	0	1	0	0	0	0	0	0	0	1	0	0	0	6	0	0	0	0	0	0	0.4586
[BMIM][PF6]	[BMIM]	[PF6]	313.3	72.15	1	1	4	2	0	0	0	0	0	0	0	0	0	0	0	0	0	0	0	1	0	0	0	0	1	0	0	0	0	0	0	0	1	0	0	0	6	0	0	0	0	0	0	0.5555
[BMIM][PF6]	[BMIM]	[PF6]	333.3	70.24	1	1	4	2	0	0	0	0	0	0	0	0	0	0	0	0	0	0	0	1	0	0	0	0	1	0	0	0	0	0	0	0	1	0	0	0	6	0	0	0	0	0	0	0.4273
[BMIM][PF6]	[BMIM]	[PF6]	313.3	69.81	1	1	4	2	0	0	0	0	0	0	0	0	0	0	0	0	0	0	0	1	0	0	0	0	1	0	0	0	0	0	0	0	1	0	0	0	6	0	0	0	0	0	0	0.5463
[BMIM][PF6]	[BMIM]	[PF6]	312.9	64.61	1	1	4	2	0	0	0	0	0	0	0	0	0	0	0	0	0	0	0	1	0	0	0	0	1	0	0	0	0	0	0	0	1	0	0	0	6	0	0	0	0	0	0	0.5179
[BMIM][PF6]	[BMIM]	[PF6]	333.3	63.69	1	1	4	2	0	0	0	0	0	0	0	0	0	0	0	0	0	0	0	1	0	0	0	0	1	0	0	0	0	0	0	0	1	0	0	0	6	0	0	0	0	0	0	0.4305
[BMIM][PF6]	[BMIM]	[PF6]	313.3	63.12	1	1	4	2	0	0	0	0	0	0	0	0	0	0	0	0	0	0	0	1	0	0	0	0	1	0	0	0	0	0	0	0	1	0	0	0	6	0	0	0	0	0	0	0.5172
[BMIM][PF6]	[BMIM]	[PF6]	333.3	62.77	1	1	4	2	0	0	0	0	0	0	0	0	0	0	0	0	0	0	0	1	0	0	0	0	1	0	0	0	0	0	0	0	1	0	0	0	6	0	0	0	0	0	0	0.3806
[BMIM][PF6]	[BMIM]	[PF6]	313.3	61.1	1	1	4	2	0	0	0	0	0	0	0	0	0	0	0	0	0	0	0	1	0	0	0	0	1	0	0	0	0	0	0	0	1	0	0	0	6	0	0	0	0	0	0	0.5176
[BMIM][PF6]	[BMIM]	[PF6]	333.3	59.88	1	1	4	2	0	0	0	0	0	0	0	0	0	0	0	0	0	0	0	1	0	0	0	0	1	0	0	0	0	0	0	0	1	0	0	0	6	0	0	0	0	0	0	0.4038
[BMIM][PF6]	[BMIM]	[PF6]	313.3	57.33	1	1	4	2	0	0	0	0	0	0	0	0	0	0	0	0	0	0	0	1	0	0	0	0	1	0	0	0	0	0	0	0	1	0	0	0	6	0	0	0	0	0	0	0.4962
[BMIM][PF6]	[BMIM]	[PF6]	333.2	57.33	1	1	4	2	0	0	0	0	0	0	0	0	0	0	0	0	0	0	0	1	0	0	0	0	1	0	0	0	0	0	0	0	1	0	0	0	6	0	0	0	0	0	0	0.3989
[BMIM][PF6]	[BMIM]	[PF6]	313.3	54.29	1	1	4	2	0	0	0	0	0	0	0	0	0	0	0	0	0	0	0	1	0	0	0	0	1	0	0	0	0	0	0	0	1	0	0	0	6	0	0	0	0	0	0	0.477
[BMIM][PF6]	[BMIM]	[PF6]	333.3	54.21	1	1	4	2	0	0	0	0	0	0	0	0	0	0	0	0	0	0	0	1	0	0	0	0	1	0	0	0	0	0	0	0	1	0	0	0	6	0	0	0	0	0	0	0.391
[BMIM][PF6]	[BMIM]	[PF6]	298.2	53.71	1	1	4	2	0	0	0	0	0	0	0	0	0	0	0	0	0	0	0	1	0	0	0	0	1	0	0	0	0	0	0	0	1	0	0	0	6	0	0	0	0	0	0	0.5667
[BMIM][PF6]	[BMIM]	[PF6]	313.3	52.05	1	1	4	2	0	0	0	0	0	0	0	0	0	0	0	0	0	0	0	1	0	0	0	0	1	0	0	0	0	0	0	0	1	0	0	0	6	0	0	0	0	0	0	0.4728
[BMIM][PF6]	[BMIM]	[PF6]	333.3	51.57	1	1	4	2	0	0	0	0	0	0	0	0	0	0	0	0	0	0	0	1	0	0	0	0	1	0	0	0	0	0	0	0	1	0	0	0	6	0	0	0	0	0	0	0.3564
[BMIM][PF6]	[BMIM]	[PF6]	313.3	50.2	1	1	4	2	0	0	0	0	0	0	0	0	0	0	0	0	0	0	0	1	0	0	0	0	1	0	0	0	0	0	0	0	1	0	0	0	6	0	0	0	0	0	0	0.4647
[BMIM][PF6]	[BMIM]	[PF6]	333.3	47.47	1	1	4	2	0	0	0	0	0	0	0	0	0	0	0	0	0	0	0	1	0	0	0	0	1	0	0	0	0	0	0	0	1	0	0	0	6	0	0	0	0	0	0	0.3156
[BMIM][PF6]	[BMIM]	[PF6]	313.3	44.76	1	1	4	2	0	0	0	0	0	0	0	0	0	0	0	0	0	0	0	1	0	0	0	0	1	0	0	0	0	0	0	0	1	0	0	0	6	0	0	0	0	0	0	0.4405
[BMIM][PF6]	[BMIM]	[PF6]	333.3	44.11	1	1	4	2	0	0	0	0	0	0	0	0	0	0	0	0	0	0	0	1	0	0	0	0	1	0	0	0	0	0	0	0	1	0	0	0	6	0	0	0	0	0	0	0.3425
[BMIM][PF6]	[BMIM]	[PF6]	333.3	44.1	1	1	4	2	0	0	0	0	0	0	0	0	0	0	0	0	0	0	0	1	0	0	0	0	1	0	0	0	0	0	0	0	1	0	0	0	6	0	0	0	0	0	0	0.3419
[BMIM][PF6]	[BMIM]	[PF6]	313.3	42.44	1	1	4	2	0	0	0	0	0	0	0	0	0	0	0	0	0	0	0	1	0	0	0	0	1	0	0	0	0	0	0	0	1	0	0	0	6	0	0	0	0	0	0	0.4294
[BMIM][PF6]	[BMIM]	[PF6]	313.3	42.16	1	1	4	2	0	0	0	0	0	0	0	0	0	0	0	0	0	0	0	1	0	0	0	0	1	0	0	0	0	0	0	0	1	0	0	0	6	0	0	0	0	0	0	0.4371
[BMIM][PF6]	[BMIM]	[PF6]	298.2	42	1	1	4	2	0	0	0	0	0	0	0	0	0	0	0	0	0	0	0	1	0	0	0	0	1	0	0	0	0	0	0	0	1	0	0	0	6	0	0	0	0	0	0	0.4905
[BMIM][PF6]	[BMIM]	[PF6]	333.3	39.49	1	1	4	2	0	0	0	0	0	0	0	0	0	0	0	0	0	0	0	1	0	0	0	0	1	0	0	0	0	0	0	0	1	0	0	0	6	0	0	0	0	0	0	0.3231
[BMIM][PF6]	[BMIM]	[PF6]	313.3	39.45	1	1	4	2	0	0	0	0	0	0	0	0	0	0	0	0	0	0	0	1	0	0	0	0	1	0	0	0	0	0	0	0	1	0	0	0	6	0	0	0	0	0	0	0.3985
[BMIM][PF6]	[BMIM]	[PF6]	313.3	35.76	1	1	4	2	0	0	0	0	0	0	0	0	0	0	0	0	0	0	0	1	0	0	0	0	1	0	0	0	0	0	0	0	1	0	0	0	6	0	0	0	0	0	0	0.4018
[BMIM][PF6]	[BMIM]	[PF6]	333.3	33.61	1	1	4	2	0	0	0	0	0	0	0	0	0	0	0	0	0	0	0	1	0	0	0	0	1	0	0	0	0	0	0	0	1	0	0	0	6	0	0	0	0	0	0	0.2794
[BMIM][PF6]	[BMIM]	[PF6]	333.3	32.53	1	1	4	2	0	0	0	0	0	0	0	0	0	0	0	0	0	0	0	1	0	0	0	0	1	0	0	0	0	0	0	0	1	0	0	0	6	0	0	0	0	0	0	0.2342
[BMIM][PF6]	[BMIM]	[PF6]	333.3	32.11	1	1	4	2	0	0	0	0	0	0	0	0	0	0	0	0	0	0	0	1	0	0	0	0	1	0	0	0	0	0	0	0	1	0	0	0	6	0	0	0	0	0	0	0.3037
[BMIM][PF6]	[BMIM]	[PF6]	298.2	31.84	1	1	4	2	0	0	0	0	0	0	0	0	0	0	0	0	0	0	0	1	0	0	0	0	1	0	0	0	0	0	0	0	1	0	0	0	6	0	0	0	0	0	0	0.4235
[BMIM][PF6]	[BMIM]	[PF6]	313.3	31.52	1	1	4	2	0	0	0	0	0	0	0	0	0	0	0	0	0	0	0	1	0	0	0	0	1	0	0	0	0	0	0	0	1	0	0	0	6	0	0	0	0	0	0	0.3615
[BMIM][PF6]	[BMIM]	[PF6]	333.3	28.85	1	1	4	2	0	0	0	0	0	0	0	0	0	0	0	0	0	0	0	1	0	0	0	0	1	0	0	0	0	0	0	0	1	0	0	0	6	0	0	0	0	0	0	0.2627
[BMIM][PF6]	[BMIM]	[PF6]	313.3	28.59	1	1	4	2	0	0	0	0	0	0	0	0	0	0	0	0	0	0	0	1	0	0	0	0	1	0	0	0	0	0	0	0	1	0	0	0	6	0	0	0	0	0	0	0.3131
[BMIM][PF6]	[BMIM]	[PF6]	313.3	28.06	1	1	4	2	0	0	0	0	0	0	0	0	0	0	0	0	0	0	0	1	0	0	0	0	1	0	0	0	0	0	0	0	1	0	0	0	6	0	0	0	0	0	0	0.3642
[BMIM][PF6]	[BMIM]	[PF6]	313.3	24.65	1	1	4	2	0	0	0	0	0	0	0	0	0	0	0	0	0	0	0	1	0	0	0	0	1	0	0	0	0	0	0	0	1	0	0	0	6	0	0	0	0	0	0	0.3031
[BMIM][PF6]	[BMIM]	[PF6]	333.3	24.52	1	1	4	2	0	0	0	0	0	0	0	0	0	0	0	0	0	0	0	1	0	0	0	0	1	0	0	0	0	0	0	0	1	0	0	0	6	0	0	0	0	0	0	0.2221
[BMIM][PF6]	[BMIM]	[PF6]	333.3	21.52	1	1	4	2	0	0	0	0	0	0	0	0	0	0	0	0	0	0	0	1	0	0	0	0	1	0	0	0	0	0	0	0	1	0	0	0	6	0	0	0	0	0	0	0.2423
[BMIM][PF6]	[BMIM]	[PF6]	313.2	21.17	1	1	4	2	0	0	0	0	0	0	0	0	0	0	0	0	0	0	0	1	0	0	0	0	1	0	0	0	0	0	0	0	1	0	0	0	6	0	0	0	0	0	0	0.2879
[BMIM][PF6]	[BMIM]	[PF6]	298.2	20.98	1	1	4	2	0	0	0	0	0	0	0	0	0	0	0	0	0	0	0	1	0	0	0	0	1	0	0	0	0	0	0	0	1	0	0	0	6	0	0	0	0	0	0	0.3188
[BMIM][PF6]	[BMIM]	[PF6]	313.3	19.66	1	1	4	2	0	0	0	0	0	0	0	0	0	0	0	0	0	0	0	1	0	0	0	0	1	0	0	0	0	0	0	0	1	0	0	0	6	0	0	0	0	0	0	0.3125
[BMIM][PF6]	[BMIM]	[PF6]	333.3	17.41	1	1	4	2	0	0	0	0	0	0	0	0	0	0	0	0	0	0	0	1	0	0	0	0	1	0	0	0	0	0	0	0	1	0	0	0	6	0	0	0	0	0	0	0.1716
[BMIM][PF6]	[BMIM]	[PF6]	313.3	15.68	1	1	4	2	0	0	0	0	0	0	0	0	0	0	0	0	0	0	0	1	0	0	0	0	1	0	0	0	0	0	0	0	1	0	0	0	6	0	0	0	0	0	0	0.1845
[BMIM][PF6]	[BMIM]	[PF6]	333.3	14.65	1	1	4	2	0	0	0	0	0	0	0	0	0	0	0	0	0	0	0	1	0	0	0	0	1	0	0	0	0	0	0	0	1	0	0	0	6	0	0	0	0	0	0	0.1451
[BMIM][PF6]	[BMIM]	[PF6]	333.3	14.48	1	1	4	2	0	0	0	0	0	0	0	0	0	0	0	0	0	0	0	1	0	0	0	0	1	0	0	0	0	0	0	0	1	0	0	0	6	0	0	0	0	0	0	0.1279
[BMIM][PF6]	[BMIM]	[PF6]	313.3	13.97	1	1	4	2	0	0	0	0	0	0	0	0	0	0	0	0	0	0	0	1	0	0	0	0	1	0	0	0	0	0	0	0	1	0	0	0	6	0	0	0	0	0	0	0.2126
[BMIM][PF6]	[BMIM]	[PF6]	313.3	13.95	1	1	4	2	0	0	0	0	0	0	0	0	0	0	0	0	0	0	0	1	0	0	0	0	1	0	0	0	0	0	0	0	1	0	0	0	6	0	0	0	0	0	0	0.1988
[BMIM][PF6]	[BMIM]	[PF6]	298.2	13.31	1	1	4	2	0	0	0	0	0	0	0	0	0	0	0	0	0	0	0	1	0	0	0	0	1	0	0	0	0	0	0	0	1	0	0	0	6	0	0	0	0	0	0	0.2073
[BMIM][PF6]	[BMIM]	[PF6]	313.3	11.09	1	1	4	2	0	0	0	0	0	0	0	0	0	0	0	0	0	0	0	1	0	0	0	0	1	0	0	0	0	0	0	0	1	0	0	0	6	0	0	0	0	0	0	0.1978
[BMIM][PF6]	[BMIM]	[PF6]	333.3	10.95	1	1	4	2	0	0	0	0	0	0	0	0	0	0	0	0	0	0	0	1	0	0	0	0	1	0	0	0	0	0	0	0	1	0	0	0	6	0	0	0	0	0	0	0.1342
[BMIM][PF6]	[BMIM]	[PF6]	313.3	5.6	1	1	4	2	0	0	0	0	0	0	0	0	0	0	0	0	0	0	0	1	0	0	0	0	1	0	0	0	0	0	0	0	1	0	0	0	6	0	0	0	0	0	0	0.0897
[BMIM][Tf2N]	[BMIM]	[Tf2N]	313.3	132.43	1	1	4	2	0	0	0	0	0	0	0	0	0	0	0	0	0	0	0	1	0	0	0	0	0	0	0	0	1	0	0	0	0	0	0	0	2	0	0	1	0	0	0	0.7521
[BMIM][Tf2N]	[BMIM]	[Tf2N]	333.3	130.19	1	1	4	2	0	0	0	0	0	0	0	0	0	0	0	0	0	0	0	1	0	0	0	0	0	0	0	0	1	0	0	0	0	0	0	0	2	0	0	1	0	0	0	0.7189
[BMIM][Tf2N]	[BMIM]	[Tf2N]	333.3	111.12	1	1	4	2	0	0	0	0	0	0	0	0	0	0	0	0	0	0	0	1	0	0	0	0	0	0	0	0	1	0	0	0	0	0	0	0	2	0	0	1	0	0	0	0.6894
[BMIM][Tf2N]	[BMIM]	[Tf2N]	313.3	110.25	1	1	4	2	0	0	0	0	0	0	0	0	0	0	0	0	0	0	0	1	0	0	0	0	0	0	0	0	1	0	0	0	0	0	0	0	2	0	0	1	0	0	0	0.742
[BMIM][Tf2N]	[BMIM]	[Tf2N]	333.3	94.44	1	1	4	2	0	0	0	0	0	0	0	0	0	0	0	0	0	0	0	1	0	0	0	0	0	0	0	0	1	0	0	0	0	0	0	0	2	0	0	1	0	0	0	0.6609
[BMIM][Tf2N]	[BMIM]	[Tf2N]	313.3	89.97	1	1	4	2	0	0	0	0	0	0	0	0	0	0	0	0	0	0	0	1	0	0	0	0	0	0	0	0	1	0	0	0	0	0	0	0	2	0	0	1	0	0	0	0.7072
[BMIM][Tf2N]	[BMIM]	[Tf2N]	333.3	87.14	1	1	4	2	0	0	0	0	0	0	0	0	0	0	0	0	0	0	0	1	0	0	0	0	0	0	0	0	1	0	0	0	0	0	0	0	2	0	0	1	0	0	0	0.6487
[BMIM][Tf2N]	[BMIM]	[Tf2N]	333.3	80.97	1	1	4	2	0	0	0	0	0	0	0	0	0	0	0	0	0	0	0	1	0	0	0	0	0	0	0	0	1	0	0	0	0	0	0	0	2	0	0	1	0	0	0	0.6194
[BMIM][Tf2N]	[BMIM]	[Tf2N]	313.2	78.45	1	1	4	2	0	0	0	0	0	0	0	0	0	0	0	0	0	0	0	1	0	0	0	0	0	0	0	0	1	0	0	0	0	0	0	0	2	0	0	1	0	0	0	0.7128
[BMIM][Tf2N]	[BMIM]	[Tf2N]	333.3	77.2	1	1	4	2	0	0	0	0	0	0	0	0	0	0	0	0	0	0	0	1	0	0	0	0	0	0	0	0	1	0	0	0	0	0	0	0	2	0	0	1	0	0	0	0.5859
[BMIM][Tf2N]	[BMIM]	[Tf2N]	313.3	76.73	1	1	4	2	0	0	0	0	0	0	0	0	0	0	0	0	0	0	0	1	0	0	0	0	0	0	0	0	1	0	0	0	0	0	0	0	2	0	0	1	0	0	0	0.6823
[BMIM][Tf2N]	[BMIM]	[Tf2N]	313.3	71.29	1	1	4	2	0	0	0	0	0	0	0	0	0	0	0	0	0	0	0	1	0	0	0	0	0	0	0	0	1	0	0	0	0	0	0	0	2	0	0	1	0	0	0	0.663
[BMIM][Tf2N]	[BMIM]	[Tf2N]	333.3	70.81	1	1	4	2	0	0	0	0	0	0	0	0	0	0	0	0	0	0	0	1	0	0	0	0	0	0	0	0	1	0	0	0	0	0	0	0	2	0	0	1	0	0	0	0.5723
[BMIM][Tf2N]	[BMIM]	[Tf2N]	333.3	66.8	1	1	4	2	0	0	0	0	0	0	0	0	0	0	0	0	0	0	0	1	0	0	0	0	0	0	0	0	1	0	0	0	0	0	0	0	2	0	0	1	0	0	0	0.5425
[BMIM][Tf2N]	[BMIM]	[Tf2N]	313.3	64.8	1	1	4	2	0	0	0	0	0	0	0	0	0	0	0	0	0	0	0	1	0	0	0	0	0	0	0	0	1	0	0	0	0	0	0	0	2	0	0	1	0	0	0	0.6473
[BMIM][Tf2N]	[BMIM]	[Tf2N]	313.2	63.59	1	1	4	2	0	0	0	0	0	0	0	0	0	0	0	0	0	0	0	1	0	0	0	0	0	0	0	0	1	0	0	0	0	0	0	0	2	0	0	1	0	0	0	0.6335
[BMIM][Tf2N]	[BMIM]	[Tf2N]	333.3	63.18	1	1	4	2	0	0	0	0	0	0	0	0	0	0	0	0	0	0	0	1	0	0	0	0	0	0	0	0	1	0	0	0	0	0	0	0	2	0	0	1	0	0	0	0.534
[BMIM][Tf2N]	[BMIM]	[Tf2N]	298.2	60.35	1	1	4	2	0	0	0	0	0	0	0	0	0	0	0	0	0	0	0	1	0	0	0	0	0	0	0	0	1	0	0	0	0	0	0	0	2	0	0	1	0	0	0	0.7168
[BMIM][Tf2N]	[BMIM]	[Tf2N]	298.1	59.2	1	1	4	2	0	0	0	0	0	0	0	0	0	0	0	0	0	0	0	1	0	0	0	0	0	0	0	0	1	0	0	0	0	0	0	0	2	0	0	1	0	0	0	0.7188
[BMIM][Tf2N]	[BMIM]	[Tf2N]	298.2	58.76	1	1	4	2	0	0	0	0	0	0	0	0	0	0	0	0	0	0	0	1	0	0	0	0	0	0	0	0	1	0	0	0	0	0	0	0	2	0	0	1	0	0	0	0.706
[BMIM][Tf2N]	[BMIM]	[Tf2N]	333.3	56.01	1	1	4	2	0	0	0	0	0	0	0	0	0	0	0	0	0	0	0	1	0	0	0	0	0	0	0	0	1	0	0	0	0	0	0	0	2	0	0	1	0	0	0	0.5066
[BMIM][Tf2N]	[BMIM]	[Tf2N]	313.3	52.73	1	1	4	2	0	0	0	0	0	0	0	0	0	0	0	0	0	0	0	1	0	0	0	0	0	0	0	0	1	0	0	0	0	0	0	0	2	0	0	1	0	0	0	0.5773
[BMIM][Tf2N]	[BMIM]	[Tf2N]	333.3	52.62	1	1	4	2	0	0	0	0	0	0	0	0	0	0	0	0	0	0	0	1	0	0	0	0	0	0	0	0	1	0	0	0	0	0	0	0	2	0	0	1	0	0	0	0.4876
[BMIM][Tf2N]	[BMIM]	[Tf2N]	333.3	49.5	1	1	4	2	0	0	0	0	0	0	0	0	0	0	0	0	0	0	0	1	0	0	0	0	0	0	0	0	1	0	0	0	0	0	0	0	2	0	0	1	0	0	0	0.4752
[BMIM][Tf2N]	[BMIM]	[Tf2N]	313.3	48.21	1	1	4	2	0	0	0	0	0	0	0	0	0	0	0	0	0	0	0	1	0	0	0	0	0	0	0	0	1	0	0	0	0	0	0	0	2	0	0	1	0	0	0	0.5539
[BMIM][Tf2N]	[BMIM]	[Tf2N]	313.2	47.45	1	1	4	2	0	0	0	0	0	0	0	0	0	0	0	0	0	0	0	1	0	0	0	0	0	0	0	0	1	0	0	0	0	0	0	0	2	0	0	1	0	0	0	0.543
[BMIM][Tf2N]	[BMIM]	[Tf2N]	298.2	46.94	1	1	4	2	0	0	0	0	0	0	0	0	0	0	0	0	0	0	0	1	0	0	0	0	0	0	0	0	1	0	0	0	0	0	0	0	2	0	0	1	0	0	0	0.6491
[BMIM][Tf2N]	[BMIM]	[Tf2N]	298.2	46.67	1	1	4	2	0	0	0	0	0	0	0	0	0	0	0	0	0	0	0	1	0	0	0	0	0	0	0	0	1	0	0	0	0	0	0	0	2	0	0	1	0	0	0	0.6356
[BMIM][Tf2N]	[BMIM]	[Tf2N]	298.2	44.27	1	1	4	2	0	0	0	0	0	0	0	0	0	0	0	0	0	0	0	1	0	0	0	0	0	0	0	0	1	0	0	0	0	0	0	0	2	0	0	1	0	0	0	0.6181
[BMIM][Tf2N]	[BMIM]	[Tf2N]	298.2	42.72	1	1	4	2	0	0	0	0	0	0	0	0	0	0	0	0	0	0	0	1	0	0	0	0	0	0	0	0	1	0	0	0	0	0	0	0	2	0	0	1	0	0	0	0.6198
[BMIM][Tf2N]	[BMIM]	[Tf2N]	313.3	40.19	1	1	4	2	0	0	0	0	0	0	0	0	0	0	0	0	0	0	0	1	0	0	0	0	0	0	0	0	1	0	0	0	0	0	0	0	2	0	0	1	0	0	0	0.5194
[BMIM][Tf2N]	[BMIM]	[Tf2N]	333.3	39.67	1	1	4	2	0	0	0	0	0	0	0	0	0	0	0	0	0	0	0	1	0	0	0	0	0	0	0	0	1	0	0	0	0	0	0	0	2	0	0	1	0	0	0	0.4218
[BMIM][Tf2N]	[BMIM]	[Tf2N]	333.3	38.84	1	1	4	2	0	0	0	0	0	0	0	0	0	0	0	0	0	0	0	1	0	0	0	0	0	0	0	0	1	0	0	0	0	0	0	0	2	0	0	1	0	0	0	0.4105
[BMIM][Tf2N]	[BMIM]	[Tf2N]	333.3	34.23	1	1	4	2	0	0	0	0	0	0	0	0	0	0	0	0	0	0	0	1	0	0	0	0	0	0	0	0	1	0	0	0	0	0	0	0	2	0	0	1	0	0	0	0.4128
[BMIM][Tf2N]	[BMIM]	[Tf2N]	298.2	33.96	1	1	4	2	0	0	0	0	0	0	0	0	0	0	0	0	0	0	0	1	0	0	0	0	0	0	0	0	1	0	0	0	0	0	0	0	2	0	0	1	0	0	0	0.534
[BMIM][Tf2N]	[BMIM]	[Tf2N]	298.2	33.59	1	1	4	2	0	0	0	0	0	0	0	0	0	0	0	0	0	0	0	1	0	0	0	0	0	0	0	0	1	0	0	0	0	0	0	0	2	0	0	1	0	0	0	0.5307
[BMIM][Tf2N]	[BMIM]	[Tf2N]	313.3	32.76	1	1	4	2	0	0	0	0	0	0	0	0	0	0	0	0	0	0	0	1	0	0	0	0	0	0	0	0	1	0	0	0	0	0	0	0	2	0	0	1	0	0	0	0.4384
[BMIM][Tf2N]	[BMIM]	[Tf2N]	313.2	32.48	1	1	4	2	0	0	0	0	0	0	0	0	0	0	0	0	0	0	0	1	0	0	0	0	0	0	0	0	1	0	0	0	0	0	0	0	2	0	0	1	0	0	0	0.4274
[BMIM][Tf2N]	[BMIM]	[Tf2N]	298.2	31.69	1	1	4	2	0	0	0	0	0	0	0	0	0	0	0	0	0	0	0	1	0	0	0	0	0	0	0	0	1	0	0	0	0	0	0	0	2	0	0	1	0	0	0	0.5245
[BMIM][Tf2N]	[BMIM]	[Tf2N]	298.2	29.5	1	1	4	2	0	0	0	0	0	0	0	0	0	0	0	0	0	0	0	1	0	0	0	0	0	0	0	0	1	0	0	0	0	0	0	0	2	0	0	1	0	0	0	0.5138
[BMIM][Tf2N]	[BMIM]	[Tf2N]	333.3	25.08	1	1	4	2	0	0	0	0	0	0	0	0	0	0	0	0	0	0	0	1	0	0	0	0	0	0	0	0	1	0	0	0	0	0	0	0	2	0	0	1	0	0	0	0.3109
[BMIM][Tf2N]	[BMIM]	[Tf2N]	313.3	24.29	1	1	4	2	0	0	0	0	0	0	0	0	0	0	0	0	0	0	0	1	0	0	0	0	0	0	0	0	1	0	0	0	0	0	0	0	2	0	0	1	0	0	0	0.3728
[BMIM][Tf2N]	[BMIM]	[Tf2N]	298.2	22.28	1	1	4	2	0	0	0	0	0	0	0	0	0	0	0	0	0	0	0	1	0	0	0	0	0	0	0	0	1	0	0	0	0	0	0	0	2	0	0	1	0	0	0	0.4034
[BMIM][Tf2N]	[BMIM]	[Tf2N]	298.2	22.24	1	1	4	2	0	0	0	0	0	0	0	0	0	0	0	0	0	0	0	1	0	0	0	0	0	0	0	0	1	0	0	0	0	0	0	0	2	0	0	1	0	0	0	0.4218
[BMIM][Tf2N]	[BMIM]	[Tf2N]	298.2	20.84	1	1	4	2	0	0	0	0	0	0	0	0	0	0	0	0	0	0	0	1	0	0	0	0	0	0	0	0	1	0	0	0	0	0	0	0	2	0	0	1	0	0	0	0.4114
[BMIM][Tf2N]	[BMIM]	[Tf2N]	333.3	20.48	1	1	4	2	0	0	0	0	0	0	0	0	0	0	0	0	0	0	0	1	0	0	0	0	0	0	0	0	1	0	0	0	0	0	0	0	2	0	0	1	0	0	0	0.2579
[BMIM][Tf2N]	[BMIM]	[Tf2N]	298.2	18.68	1	1	4	2	0	0	0	0	0	0	0	0	0	0	0	0	0	0	0	1	0	0	0	0	0	0	0	0	1	0	0	0	0	0	0	0	2	0	0	1	0	0	0	0.3624
[BMIM][Tf2N]	[BMIM]	[Tf2N]	333.3	18.12	1	1	4	2	0	0	0	0	0	0	0	0	0	0	0	0	0	0	0	1	0	0	0	0	0	0	0	0	1	0	0	0	0	0	0	0	2	0	0	1	0	0	0	0.2498
[BMIM][Tf2N]	[BMIM]	[Tf2N]	313.3	17.21	1	1	4	2	0	0	0	0	0	0	0	0	0	0	0	0	0	0	0	1	0	0	0	0	0	0	0	0	1	0	0	0	0	0	0	0	2	0	0	1	0	0	0	0.2687
[BMIM][Tf2N]	[BMIM]	[Tf2N]	313.2	16.1	1	1	4	2	0	0	0	0	0	0	0	0	0	0	0	0	0	0	0	1	0	0	0	0	0	0	0	0	1	0	0	0	0	0	0	0	2	0	0	1	0	0	0	0.2383
[BMIM][Tf2N]	[BMIM]	[Tf2N]	313.3	13.89	1	1	4	2	0	0	0	0	0	0	0	0	0	0	0	0	0	0	0	1	0	0	0	0	0	0	0	0	1	0	0	0	0	0	0	0	2	0	0	1	0	0	0	0.2586
[BMIM][Tf2N]	[BMIM]	[Tf2N]	333.3	13.64	1	1	4	2	0	0	0	0	0	0	0	0	0	0	0	0	0	0	0	1	0	0	0	0	0	0	0	0	1	0	0	0	0	0	0	0	2	0	0	1	0	0	0	0.1759
[BMIM][Tf2N]	[BMIM]	[Tf2N]	298.2	11.65	1	1	4	2	0	0	0	0	0	0	0	0	0	0	0	0	0	0	0	1	0	0	0	0	0	0	0	0	1	0	0	0	0	0	0	0	2	0	0	1	0	0	0	0.2525
[BMIM][Tf2N]	[BMIM]	[Tf2N]	298.2	11.63	1	1	4	2	0	0	0	0	0	0	0	0	0	0	0	0	0	0	0	1	0	0	0	0	0	0	0	0	1	0	0	0	0	0	0	0	2	0	0	1	0	0	0	0.2715
[BMIM][Tf2N]	[BMIM]	[Tf2N]	298.2	11.38	1	1	4	2	0	0	0	0	0	0	0	0	0	0	0	0	0	0	0	1	0	0	0	0	0	0	0	0	1	0	0	0	0	0	0	0	2	0	0	1	0	0	0	0.2682
[HMIM][Tf2N]	[HMIM]	[Tf2N]	313.3	115.58	1	1	6	2	0	0	0	0	0	0	0	0	0	0	0	0	0	0	0	1	0	0	0	0	0	0	0	0	1	0	0	0	0	0	0	0	2	0	0	1	0	0	0	0.7586
[HMIM][Tf2N]	[HMIM]	[Tf2N]	333.3	111.45	1	1	6	2	0	0	0	0	0	0	0	0	0	0	0	0	0	0	0	1	0	0	0	0	0	0	0	0	1	0	0	0	0	0	0	0	2	0	0	1	0	0	0	0.7192
[HMIM][Tf2N]	[HMIM]	[Tf2N]	313.3	97.92	1	1	6	2	0	0	0	0	0	0	0	0	0	0	0	0	0	0	0	1	0	0	0	0	0	0	0	0	1	0	0	0	0	0	0	0	2	0	0	1	0	0	0	0.7478
[HMIM][Tf2N]	[HMIM]	[Tf2N]	333.3	97.44	1	1	6	2	0	0	0	0	0	0	0	0	0	0	0	0	0	0	0	1	0	0	0	0	0	0	0	0	1	0	0	0	0	0	0	0	2	0	0	1	0	0	0	0.6932
[HMIM][Tf2N]	[HMIM]	[Tf2N]	313.3	83.73	1	1	6	2	0	0	0	0	0	0	0	0	0	0	0	0	0	0	0	1	0	0	0	0	0	0	0	0	1	0	0	0	0	0	0	0	2	0	0	1	0	0	0	0.723
[HMIM][Tf2N]	[HMIM]	[Tf2N]	333.3	83.6	1	1	6	2	0	0	0	0	0	0	0	0	0	0	0	0	0	0	0	1	0	0	0	0	0	0	0	0	1	0	0	0	0	0	0	0	2	0	0	1	0	0	0	0.6446
[HMIM][Tf2N]	[HMIM]	[Tf2N]	313.3	83.56	1	1	6	2	0	0	0	0	0	0	0	0	0	0	0	0	0	0	0	1	0	0	0	0	0	0	0	0	1	0	0	0	0	0	0	0	2	0	0	1	0	0	0	0.7321
[HMIM][Tf2N]	[HMIM]	[Tf2N]	333.3	70.39	1	1	6	2	0	0	0	0	0	0	0	0	0	0	0	0	0	0	0	1	0	0	0	0	0	0	0	0	1	0	0	0	0	0	0	0	2	0	0	1	0	0	0	0.5867
[HMIM][Tf2N]	[HMIM]	[Tf2N]	313.3	70.02	1	1	6	2	0	0	0	0	0	0	0	0	0	0	0	0	0	0	0	1	0	0	0	0	0	0	0	0	1	0	0	0	0	0	0	0	2	0	0	1	0	0	0	0.678
[HMIM][Tf2N]	[HMIM]	[Tf2N]	313.3	69.91	1	1	6	2	0	0	0	0	0	0	0	0	0	0	0	0	0	0	0	1	0	0	0	0	0	0	0	0	1	0	0	0	0	0	0	0	2	0	0	1	0	0	0	0.6852
[HMIM][Tf2N]	[HMIM]	[Tf2N]	298.2	60.91	1	1	6	2	0	0	0	0	0	0	0	0	0	0	0	0	0	0	0	1	0	0	0	0	0	0	0	0	1	0	0	0	0	0	0	0	2	0	0	1	0	0	0	0.7396
[HMIM][Tf2N]	[HMIM]	[Tf2N]	313.3	57.46	1	1	6	2	0	0	0	0	0	0	0	0	0	0	0	0	0	0	0	1	0	0	0	0	0	0	0	0	1	0	0	0	0	0	0	0	2	0	0	1	0	0	0	0.6253
[HMIM][Tf2N]	[HMIM]	[Tf2N]	333.3	56.21	1	1	6	2	0	0	0	0	0	0	0	0	0	0	0	0	0	0	0	1	0	0	0	0	0	0	0	0	1	0	0	0	0	0	0	0	2	0	0	1	0	0	0	0.5028
[HMIM][Tf2N]	[HMIM]	[Tf2N]	313.3	55.8	1	1	6	2	0	0	0	0	0	0	0	0	0	0	0	0	0	0	0	1	0	0	0	0	0	0	0	0	1	0	0	0	0	0	0	0	2	0	0	1	0	0	0	0.6195
[HMIM][Tf2N]	[HMIM]	[Tf2N]	298.2	51.56	1	1	6	2	0	0	0	0	0	0	0	0	0	0	0	0	0	0	0	1	0	0	0	0	0	0	0	0	1	0	0	0	0	0	0	0	2	0	0	1	0	0	0	0.6889
[HMIM][Tf2N]	[HMIM]	[Tf2N]	333.3	43.97	1	1	6	2	0	0	0	0	0	0	0	0	0	0	0	0	0	0	0	1	0	0	0	0	0	0	0	0	1	0	0	0	0	0	0	0	2	0	0	1	0	0	0	0.4329
[HMIM][Tf2N]	[HMIM]	[Tf2N]	313.3	42.53	1	1	6	2	0	0	0	0	0	0	0	0	0	0	0	0	0	0	0	1	0	0	0	0	0	0	0	0	1	0	0	0	0	0	0	0	2	0	0	1	0	0	0	0.5434
[HMIM][Tf2N]	[HMIM]	[Tf2N]	298.2	42.34	1	1	6	2	0	0	0	0	0	0	0	0	0	0	0	0	0	0	0	1	0	0	0	0	0	0	0	0	1	0	0	0	0	0	0	0	2	0	0	1	0	0	0	0.6282
[HMIM][Tf2N]	[HMIM]	[Tf2N]	313.3	41.55	1	1	6	2	0	0	0	0	0	0	0	0	0	0	0	0	0	0	0	1	0	0	0	0	0	0	0	0	1	0	0	0	0	0	0	0	2	0	0	1	0	0	0	0.5386
[HMIM][Tf2N]	[HMIM]	[Tf2N]	333.3	31.91	1	1	6	2	0	0	0	0	0	0	0	0	0	0	0	0	0	0	0	1	0	0	0	0	0	0	0	0	1	0	0	0	0	0	0	0	2	0	0	1	0	0	0	0.3613
[HMIM][Tf2N]	[HMIM]	[Tf2N]	298.1	31.88	1	1	6	2	0	0	0	0	0	0	0	0	0	0	0	0	0	0	0	1	0	0	0	0	0	0	0	0	1	0	0	0	0	0	0	0	2	0	0	1	0	0	0	0.5446
[HMIM][Tf2N]	[HMIM]	[Tf2N]	313.3	28.19	1	1	6	2	0	0	0	0	0	0	0	0	0	0	0	0	0	0	0	1	0	0	0	0	0	0	0	0	1	0	0	0	0	0	0	0	2	0	0	1	0	0	0	0.4255
[HMIM][Tf2N]	[HMIM]	[Tf2N]	313.3	28.16	1	1	6	2	0	0	0	0	0	0	0	0	0	0	0	0	0	0	0	1	0	0	0	0	0	0	0	0	1	0	0	0	0	0	0	0	2	0	0	1	0	0	0	0.427
[HMIM][Tf2N]	[HMIM]	[Tf2N]	298.1	21.95	1	1	6	2	0	0	0	0	0	0	0	0	0	0	0	0	0	0	0	1	0	0	0	0	0	0	0	0	1	0	0	0	0	0	0	0	2	0	0	1	0	0	0	0.4354
[HMIM][Tf2N]	[HMIM]	[Tf2N]	333.3	17.15	1	1	6	2	0	0	0	0	0	0	0	0	0	0	0	0	0	0	0	1	0	0	0	0	0	0	0	0	1	0	0	0	0	0	0	0	2	0	0	1	0	0	0	0.1993
[HMIM][Tf2N]	[HMIM]	[Tf2N]	313.3	15.37	1	1	6	2	0	0	0	0	0	0	0	0	0	0	0	0	0	0	0	1	0	0	0	0	0	0	0	0	1	0	0	0	0	0	0	0	2	0	0	1	0	0	0	0.298
[HMIM][Tf2N]	[HMIM]	[Tf2N]	313.2	13.71	1	1	6	2	0	0	0	0	0	0	0	0	0	0	0	0	0	0	0	1	0	0	0	0	0	0	0	0	1	0	0	0	0	0	0	0	2	0	0	1	0	0	0	0.2535
[HMIM][Tf2N]	[HMIM]	[Tf2N]	298.2	13.15	1	1	6	2	0	0	0	0	0	0	0	0	0	0	0	0	0	0	0	1	0	0	0	0	0	0	0	0	1	0	0	0	0	0	0	0	2	0	0	1	0	0	0	0.2706
[HMMIM][Tf2N]	[HMMIM]	[Tf2N]	333.3	118.04	2	1	6	3	0	0	0	0	0	0	0	0	0	0	0	0	0	0	0	1	0	0	0	0	0	0	0	0	1	0	0	0	0	0	0	0	2	0	0	1	0	0	0	0.7447
[HMMIM][Tf2N]	[HMMIM]	[Tf2N]	313.3	111.02	2	1	6	3	0	0	0	0	0	0	0	0	0	0	0	0	0	0	0	1	0	0	0	0	0	0	0	0	1	0	0	0	0	0	0	0	2	0	0	1	0	0	0	0.7105
[HMMIM][Tf2N]	[HMMIM]	[Tf2N]	333.3	104.72	2	1	6	3	0	0	0	0	0	0	0	0	0	0	0	0	0	0	0	1	0	0	0	0	0	0	0	0	1	0	0	0	0	0	0	0	2	0	0	1	0	0	0	0.7231
[HMMIM][Tf2N]	[HMMIM]	[Tf2N]	313.3	97.76	2	1	6	3	0	0	0	0	0	0	0	0	0	0	0	0	0	0	0	1	0	0	0	0	0	0	0	0	1	0	0	0	0	0	0	0	2	0	0	1	0	0	0	0.6963
[HMMIM][Tf2N]	[HMMIM]	[Tf2N]	333.3	91.67	2	1	6	3	0	0	0	0	0	0	0	0	0	0	0	0	0	0	0	1	0	0	0	0	0	0	0	0	1	0	0	0	0	0	0	0	2	0	0	1	0	0	0	0.6793
[HMMIM][Tf2N]	[HMMIM]	[Tf2N]	333.3	90.66	2	1	6	3	0	0	0	0	0	0	0	0	0	0	0	0	0	0	0	1	0	0	0	0	0	0	0	0	1	0	0	0	0	0	0	0	2	0	0	1	0	0	0	0.6869
[HMMIM][Tf2N]	[HMMIM]	[Tf2N]	313.3	87.22	2	1	6	3	0	0	0	0	0	0	0	0	0	0	0	0	0	0	0	1	0	0	0	0	0	0	0	0	1	0	0	0	0	0	0	0	2	0	0	1	0	0	0	0.6931
[HMMIM][Tf2N]	[HMMIM]	[Tf2N]	313.3	83.84	2	1	6	3	0	0	0	0	0	0	0	0	0	0	0	0	0	0	0	1	0	0	0	0	0	0	0	0	1	0	0	0	0	0	0	0	2	0	0	1	0	0	0	0.6807
[HMMIM][Tf2N]	[HMMIM]	[Tf2N]	313.3	77.14	2	1	6	3	0	0	0	0	0	0	0	0	0	0	0	0	0	0	0	1	0	0	0	0	0	0	0	0	1	0	0	0	0	0	0	0	2	0	0	1	0	0	0	0.6696
[HMMIM][Tf2N]	[HMMIM]	[Tf2N]	333.3	76.95	2	1	6	3	0	0	0	0	0	0	0	0	0	0	0	0	0	0	0	1	0	0	0	0	0	0	0	0	1	0	0	0	0	0	0	0	2	0	0	1	0	0	0	0.6215
[HMMIM][Tf2N]	[HMMIM]	[Tf2N]	333.3	71.52	2	1	6	3	0	0	0	0	0	0	0	0	0	0	0	0	0	0	0	1	0	0	0	0	0	0	0	0	1	0	0	0	0	0	0	0	2	0	0	1	0	0	0	0.584
[HMMIM][Tf2N]	[HMMIM]	[Tf2N]	313.3	70.35	2	1	6	3	0	0	0	0	0	0	0	0	0	0	0	0	0	0	0	1	0	0	0	0	0	0	0	0	1	0	0	0	0	0	0	0	2	0	0	1	0	0	0	0.6612
[HMMIM][Tf2N]	[HMMIM]	[Tf2N]	313.3	63.45	2	1	6	3	0	0	0	0	0	0	0	0	0	0	0	0	0	0	0	1	0	0	0	0	0	0	0	0	1	0	0	0	0	0	0	0	2	0	0	1	0	0	0	0.611
[HMMIM][Tf2N]	[HMMIM]	[Tf2N]	333.3	63.41	2	1	6	3	0	0	0	0	0	0	0	0	0	0	0	0	0	0	0	1	0	0	0	0	0	0	0	0	1	0	0	0	0	0	0	0	2	0	0	1	0	0	0	0.5479
[HMMIM][Tf2N]	[HMMIM]	[Tf2N]	333.3	58.22	2	1	6	3	0	0	0	0	0	0	0	0	0	0	0	0	0	0	0	1	0	0	0	0	0	0	0	0	1	0	0	0	0	0	0	0	2	0	0	1	0	0	0	0.5237
[HMMIM][Tf2N]	[HMMIM]	[Tf2N]	298.2	56.56	2	1	6	3	0	0	0	0	0	0	0	0	0	0	0	0	0	0	0	1	0	0	0	0	0	0	0	0	1	0	0	0	0	0	0	0	2	0	0	1	0	0	0	0.6845
[HMMIM][Tf2N]	[HMMIM]	[Tf2N]	313.3	55.25	2	1	6	3	0	0	0	0	0	0	0	0	0	0	0	0	0	0	0	1	0	0	0	0	0	0	0	0	1	0	0	0	0	0	0	0	2	0	0	1	0	0	0	0.5663
[HMMIM][Tf2N]	[HMMIM]	[Tf2N]	313.3	53.14	2	1	6	3	0	0	0	0	0	0	0	0	0	0	0	0	0	0	0	1	0	0	0	0	0	0	0	0	1	0	0	0	0	0	0	0	2	0	0	1	0	0	0	0.5837
[HMMIM][Tf2N]	[HMMIM]	[Tf2N]	333.3	49.22	2	1	6	3	0	0	0	0	0	0	0	0	0	0	0	0	0	0	0	1	0	0	0	0	0	0	0	0	1	0	0	0	0	0	0	0	2	0	0	1	0	0	0	0.473
[HMMIM][Tf2N]	[HMMIM]	[Tf2N]	298.2	43.08	2	1	6	3	0	0	0	0	0	0	0	0	0	0	0	0	0	0	0	1	0	0	0	0	0	0	0	0	1	0	0	0	0	0	0	0	2	0	0	1	0	0	0	0.6018
[HMMIM][Tf2N]	[HMMIM]	[Tf2N]	333.3	42.22	2	1	6	3	0	0	0	0	0	0	0	0	0	0	0	0	0	0	0	1	0	0	0	0	0	0	0	0	1	0	0	0	0	0	0	0	2	0	0	1	0	0	0	0.4354
[HMMIM][Tf2N]	[HMMIM]	[Tf2N]	313.3	35.76	2	1	6	3	0	0	0	0	0	0	0	0	0	0	0	0	0	0	0	1	0	0	0	0	0	0	0	0	1	0	0	0	0	0	0	0	2	0	0	1	0	0	0	0.463
[HMMIM][Tf2N]	[HMMIM]	[Tf2N]	333.3	34.55	2	1	6	3	0	0	0	0	0	0	0	0	0	0	0	0	0	0	0	1	0	0	0	0	0	0	0	0	1	0	0	0	0	0	0	0	2	0	0	1	0	0	0	0.3529
[HMMIM][Tf2N]	[HMMIM]	[Tf2N]	298.2	29.71	2	1	6	3	0	0	0	0	0	0	0	0	0	0	0	0	0	0	0	1	0	0	0	0	0	0	0	0	1	0	0	0	0	0	0	0	2	0	0	1	0	0	0	0.4956
[HMMIM][Tf2N]	[HMMIM]	[Tf2N]	333.3	27.81	2	1	6	3	0	0	0	0	0	0	0	0	0	0	0	0	0	0	0	1	0	0	0	0	0	0	0	0	1	0	0	0	0	0	0	0	2	0	0	1	0	0	0	0.3339
[HMMIM][Tf2N]	[HMMIM]	[Tf2N]	333.3	18.37	2	1	6	3	0	0	0	0	0	0	0	0	0	0	0	0	0	0	0	1	0	0	0	0	0	0	0	0	1	0	0	0	0	0	0	0	2	0	0	1	0	0	0	0.2102
[HMMIM][Tf2N]	[HMMIM]	[Tf2N]	313.3	18.33	2	1	6	3	0	0	0	0	0	0	0	0	0	0	0	0	0	0	0	1	0	0	0	0	0	0	0	0	1	0	0	0	0	0	0	0	2	0	0	1	0	0	0	0.2924
[HMMIM][Tf2N]	[HMMIM]	[Tf2N]	298.2	14.97	2	1	6	3	0	0	0	0	0	0	0	0	0	0	0	0	0	0	0	1	0	0	0	0	0	0	0	0	1	0	0	0	0	0	0	0	2	0	0	1	0	0	0	0.3017
[HMMIM][Tf2N]	[HMMIM]	[Tf2N]	333.3	14.79	2	1	6	3	0	0	0	0	0	0	0	0	0	0	0	0	0	0	0	1	0	0	0	0	0	0	0	0	1	0	0	0	0	0	0	0	2	0	0	1	0	0	0	0.1991
[OMIM][Tf2N]	[OMIM]	[Tf2N]	313.3	114.76	1	1	8	2	0	0	0	0	0	0	0	0	0	0	0	0	0	0	0	1	0	0	0	0	0	0	0	0	1	0	0	0	0	0	0	0	2	0	0	1	0	0	0	0.7918
[OMIM][Tf2N]	[OMIM]	[Tf2N]	333.3	114.69	1	1	8	2	0	0	0	0	0	0	0	0	0	0	0	0	0	0	0	1	0	0	0	0	0	0	0	0	1	0	0	0	0	0	0	0	2	0	0	1	0	0	0	0.7521
[OMIM][Tf2N]	[OMIM]	[Tf2N]	333.3	97.52	1	1	8	2	0	0	0	0	0	0	0	0	0	0	0	0	0	0	0	1	0	0	0	0	0	0	0	0	1	0	0	0	0	0	0	0	2	0	0	1	0	0	0	0.7178
[OMIM][Tf2N]	[OMIM]	[Tf2N]	313.3	96.87	1	1	8	2	0	0	0	0	0	0	0	0	0	0	0	0	0	0	0	1	0	0	0	0	0	0	0	0	1	0	0	0	0	0	0	0	2	0	0	1	0	0	0	0.7795
[OMIM][Tf2N]	[OMIM]	[Tf2N]	333.3	83.97	1	1	8	2	0	0	0	0	0	0	0	0	0	0	0	0	0	0	0	1	0	0	0	0	0	0	0	0	1	0	0	0	0	0	0	0	2	0	0	1	0	0	0	0.6886
[OMIM][Tf2N]	[OMIM]	[Tf2N]	313.3	83.6	1	1	8	2	0	0	0	0	0	0	0	0	0	0	0	0	0	0	0	1	0	0	0	0	0	0	0	0	1	0	0	0	0	0	0	0	2	0	0	1	0	0	0	0.7627
[OMIM][Tf2N]	[OMIM]	[Tf2N]	313.3	70.05	1	1	8	2	0	0	0	0	0	0	0	0	0	0	0	0	0	0	0	1	0	0	0	0	0	0	0	0	1	0	0	0	0	0	0	0	2	0	0	1	0	0	0	0.7099
[OMIM][Tf2N]	[OMIM]	[Tf2N]	333.3	70.04	1	1	8	2	0	0	0	0	0	0	0	0	0	0	0	0	0	0	0	1	0	0	0	0	0	0	0	0	1	0	0	0	0	0	0	0	2	0	0	1	0	0	0	0.6293
[OMIM][Tf2N]	[OMIM]	[Tf2N]	298.2	60.13	1	1	8	2	0	0	0	0	0	0	0	0	0	0	0	0	0	0	0	1	0	0	0	0	0	0	0	0	1	0	0	0	0	0	0	0	2	0	0	1	0	0	0	0.7516
[OMIM][Tf2N]	[OMIM]	[Tf2N]	313.3	56.76	1	1	8	2	0	0	0	0	0	0	0	0	0	0	0	0	0	0	0	1	0	0	0	0	0	0	0	0	1	0	0	0	0	0	0	0	2	0	0	1	0	0	0	0.6556
[OMIM][Tf2N]	[OMIM]	[Tf2N]	333.3	55.99	1	1	8	2	0	0	0	0	0	0	0	0	0	0	0	0	0	0	0	1	0	0	0	0	0	0	0	0	1	0	0	0	0	0	0	0	2	0	0	1	0	0	0	0.5746
[OMIM][Tf2N]	[OMIM]	[Tf2N]	298.2	50.96	1	1	8	2	0	0	0	0	0	0	0	0	0	0	0	0	0	0	0	1	0	0	0	0	0	0	0	0	1	0	0	0	0	0	0	0	2	0	0	1	0	0	0	0.7043
[OMIM][Tf2N]	[OMIM]	[Tf2N]	313.3	42.96	1	1	8	2	0	0	0	0	0	0	0	0	0	0	0	0	0	0	0	1	0	0	0	0	0	0	0	0	1	0	0	0	0	0	0	0	2	0	0	1	0	0	0	0.575
[OMIM][Tf2N]	[OMIM]	[Tf2N]	333.3	42.56	1	1	8	2	0	0	0	0	0	0	0	0	0	0	0	0	0	0	0	1	0	0	0	0	0	0	0	0	1	0	0	0	0	0	0	0	2	0	0	1	0	0	0	0.4937
[OMIM][Tf2N]	[OMIM]	[Tf2N]	298.2	41.67	1	1	8	2	0	0	0	0	0	0	0	0	0	0	0	0	0	0	0	1	0	0	0	0	0	0	0	0	1	0	0	0	0	0	0	0	2	0	0	1	0	0	0	0.6423
[OMIM][Tf2N]	[OMIM]	[Tf2N]	313.3	28.88	1	1	8	2	0	0	0	0	0	0	0	0	0	0	0	0	0	0	0	1	0	0	0	0	0	0	0	0	1	0	0	0	0	0	0	0	2	0	0	1	0	0	0	0.4508
[OMIM][Tf2N]	[OMIM]	[Tf2N]	333.3	28.59	1	1	8	2	0	0	0	0	0	0	0	0	0	0	0	0	0	0	0	1	0	0	0	0	0	0	0	0	1	0	0	0	0	0	0	0	2	0	0	1	0	0	0	0.3822
[OMIM][Tf2N]	[OMIM]	[Tf2N]	298.2	22.74	1	1	8	2	0	0	0	0	0	0	0	0	0	0	0	0	0	0	0	1	0	0	0	0	0	0	0	0	1	0	0	0	0	0	0	0	2	0	0	1	0	0	0	0.4519
[OMIM][Tf2N]	[OMIM]	[Tf2N]	333.3	16.23	1	1	8	2	0	0	0	0	0	0	0	0	0	0	0	0	0	0	0	1	0	0	0	0	0	0	0	0	1	0	0	0	0	0	0	0	2	0	0	1	0	0	0	0.2467
[OMIM][Tf2N]	[OMIM]	[Tf2N]	313.3	14.96	1	1	8	2	0	0	0	0	0	0	0	0	0	0	0	0	0	0	0	1	0	0	0	0	0	0	0	0	1	0	0	0	0	0	0	0	2	0	0	1	0	0	0	0.2775
[OMIM][Tf2N]	[OMIM]	[Tf2N]	298.2	13.26	1	1	8	2	0	0	0	0	0	0	0	0	0	0	0	0	0	0	0	1	0	0	0	0	0	0	0	0	1	0	0	0	0	0	0	0	2	0	0	1	0	0	0	0.3021
[BMIM][TfO]	[BMIM]	[TfO]	333.3	114.77	1	1	4	2	0	0	0	0	0	0	0	0	0	0	0	0	0	0	0	1	0	0	0	0	0	0	0	0	0	0	1	0	0	0	0	0	1	0	0	1	0	0	0	0.5624
[BMIM][TfO]	[BMIM]	[TfO]	333.3	97.52	1	1	4	2	0	0	0	0	0	0	0	0	0	0	0	0	0	0	0	1	0	0	0	0	0	0	0	0	0	0	1	0	0	0	0	0	1	0	0	1	0	0	0	0.5371
[BMIM][TfO]	[BMIM]	[TfO]	313.2	88.28	1	1	4	2	0	0	0	0	0	0	0	0	0	0	0	0	0	0	0	1	0	0	0	0	0	0	0	0	0	0	1	0	0	0	0	0	1	0	0	1	0	0	0	0.5833
[BMIM][TfO]	[BMIM]	[TfO]	333.3	83.94	1	1	4	2	0	0	0	0	0	0	0	0	0	0	0	0	0	0	0	1	0	0	0	0	0	0	0	0	0	0	1	0	0	0	0	0	1	0	0	1	0	0	0	0.4991
[BMIM][TfO]	[BMIM]	[TfO]	313.2	78.77	1	1	4	2	0	0	0	0	0	0	0	0	0	0	0	0	0	0	0	1	0	0	0	0	0	0	0	0	0	0	1	0	0	0	0	0	1	0	0	1	0	0	0	0.54
[BMIM][TfO]	[BMIM]	[TfO]	333.3	70.55	1	1	4	2	0	0	0	0	0	0	0	0	0	0	0	0	0	0	0	1	0	0	0	0	0	0	0	0	0	0	1	0	0	0	0	0	1	0	0	1	0	0	0	0.422
[BMIM][TfO]	[BMIM]	[TfO]	313.2	67.26	1	1	4	2	0	0	0	0	0	0	0	0	0	0	0	0	0	0	0	1	0	0	0	0	0	0	0	0	0	0	1	0	0	0	0	0	1	0	0	1	0	0	0	0.5012
[BMIM][TfO]	[BMIM]	[TfO]	298.2	63.2	1	1	4	2	0	0	0	0	0	0	0	0	0	0	0	0	0	0	0	1	0	0	0	0	0	0	0	0	0	0	1	0	0	0	0	0	1	0	0	1	0	0	0	0.6363
[BMIM][TfO]	[BMIM]	[TfO]	298.2	60.08	1	1	4	2	0	0	0	0	0	0	0	0	0	0	0	0	0	0	0	1	0	0	0	0	0	0	0	0	0	0	1	0	0	0	0	0	1	0	0	1	0	0	0	0.6087
[BMIM][TfO]	[BMIM]	[TfO]	333.3	56.49	1	1	4	2	0	0	0	0	0	0	0	0	0	0	0	0	0	0	0	1	0	0	0	0	0	0	0	0	0	0	1	0	0	0	0	0	1	0	0	1	0	0	0	0.3521
[BMIM][TfO]	[BMIM]	[TfO]	313.2	54.38	1	1	4	2	0	0	0	0	0	0	0	0	0	0	0	0	0	0	0	1	0	0	0	0	0	0	0	0	0	0	1	0	0	0	0	0	1	0	0	1	0	0	0	0.4346
[BMIM][TfO]	[BMIM]	[TfO]	298.2	52.32	1	1	4	2	0	0	0	0	0	0	0	0	0	0	0	0	0	0	0	1	0	0	0	0	0	0	0	0	0	0	1	0	0	0	0	0	1	0	0	1	0	0	0	0.5874
[BMIM][TfO]	[BMIM]	[TfO]	298.2	45.24	1	1	4	2	0	0	0	0	0	0	0	0	0	0	0	0	0	0	0	1	0	0	0	0	0	0	0	0	0	0	1	0	0	0	0	0	1	0	0	1	0	0	0	0.5337
[BMIM][TfO]	[BMIM]	[TfO]	313.3	43.78	1	1	4	2	0	0	0	0	0	0	0	0	0	0	0	0	0	0	0	1	0	0	0	0	0	0	0	0	0	0	1	0	0	0	0	0	1	0	0	1	0	0	0	0.3766
[BMIM][TfO]	[BMIM]	[TfO]	333.3	42.29	1	1	4	2	0	0	0	0	0	0	0	0	0	0	0	0	0	0	0	1	0	0	0	0	0	0	0	0	0	0	1	0	0	0	0	0	1	0	0	1	0	0	0	0.2813
[BMIM][TfO]	[BMIM]	[TfO]	298.2	41.55	1	1	4	2	0	0	0	0	0	0	0	0	0	0	0	0	0	0	0	1	0	0	0	0	0	0	0	0	0	0	1	0	0	0	0	0	1	0	0	1	0	0	0	0.529
[BMIM][TfO]	[BMIM]	[TfO]	298.2	32.54	1	1	4	2	0	0	0	0	0	0	0	0	0	0	0	0	0	0	0	1	0	0	0	0	0	0	0	0	0	0	1	0	0	0	0	0	1	0	0	1	0	0	0	0.4396
[BMIM][TfO]	[BMIM]	[TfO]	298.2	32.02	1	1	4	2	0	0	0	0	0	0	0	0	0	0	0	0	0	0	0	1	0	0	0	0	0	0	0	0	0	0	1	0	0	0	0	0	1	0	0	1	0	0	0	0.4523
[BMIM][TfO]	[BMIM]	[TfO]	313.3	31.82	1	1	4	2	0	0	0	0	0	0	0	0	0	0	0	0	0	0	0	1	0	0	0	0	0	0	0	0	0	0	1	0	0	0	0	0	1	0	0	1	0	0	0	0.309
[BMIM][TfO]	[BMIM]	[TfO]	333.3	28.71	1	1	4	2	0	0	0	0	0	0	0	0	0	0	0	0	0	0	0	1	0	0	0	0	0	0	0	0	0	0	1	0	0	0	0	0	1	0	0	1	0	0	0	0.2215
[BMIM][TfO]	[BMIM]	[TfO]	298.2	21.44	1	1	4	2	0	0	0	0	0	0	0	0	0	0	0	0	0	0	0	1	0	0	0	0	0	0	0	0	0	0	1	0	0	0	0	0	1	0	0	1	0	0	0	0.3512
[BMIM][TfO]	[BMIM]	[TfO]	313.3	20.94	1	1	4	2	0	0	0	0	0	0	0	0	0	0	0	0	0	0	0	1	0	0	0	0	0	0	0	0	0	0	1	0	0	0	0	0	1	0	0	1	0	0	0	0.2172
[BMIM][TfO]	[BMIM]	[TfO]	298.2	20.73	1	1	4	2	0	0	0	0	0	0	0	0	0	0	0	0	0	0	0	1	0	0	0	0	0	0	0	0	0	0	1	0	0	0	0	0	1	0	0	1	0	0	0	0.3434
[BMIM][TfO]	[BMIM]	[TfO]	333.3	15.14	1	1	4	2	0	0	0	0	0	0	0	0	0	0	0	0	0	0	0	1	0	0	0	0	0	0	0	0	0	0	1	0	0	0	0	0	1	0	0	1	0	0	0	0.1188
[BMIM][TfO]	[BMIM]	[TfO]	298.2	11.95	1	1	4	2	0	0	0	0	0	0	0	0	0	0	0	0	0	0	0	1	0	0	0	0	0	0	0	0	0	0	1	0	0	0	0	0	1	0	0	1	0	0	0	0.2471
[BMIM][TfO]	[BMIM]	[TfO]	298.2	10.44	1	1	4	2	0	0	0	0	0	0	0	0	0	0	0	0	0	0	0	1	0	0	0	0	0	0	0	0	0	0	1	0	0	0	0	0	1	0	0	1	0	0	0	0.1878
[BMIM][TfO]	[BMIM]	[TfO]	313.2	10.39	1	1	4	2	0	0	0	0	0	0	0	0	0	0	0	0	0	0	0	1	0	0	0	0	0	0	0	0	0	0	1	0	0	0	0	0	1	0	0	1	0	0	0	0.1088
[BMIM][BF4]	[BMIM]	[BF4]	283.15	13	1	1	4	2	0	0	0	0	0	0	0	0	0	0	0	0	0	0	0	1	0	1	0	0	0	0	0	0	0	0	0	0	1	0	0	0	4	0	0	0	0	0	0	0.243
[BMIM][BF4]	[BMIM]	[BF4]	283.15	13	1	1	4	2	0	0	0	0	0	0	0	0	0	0	0	0	0	0	0	1	0	1	0	0	0	0	0	0	0	0	0	0	1	0	0	0	4	0	0	0	0	0	0	0.243
[BMIM][BF4]	[BMIM]	[BF4]	298.15	13	1	1	4	2	0	0	0	0	0	0	0	0	0	0	0	0	0	0	0	1	0	1	0	0	0	0	0	0	0	0	0	0	1	0	0	0	4	0	0	0	0	0	0	0.182
[BMIM][BF4]	[BMIM]	[BF4]	298.15	13	1	1	4	2	0	0	0	0	0	0	0	0	0	0	0	0	0	0	0	1	0	1	0	0	0	0	0	0	0	0	0	0	1	0	0	0	4	0	0	0	0	0	0	0.182
[BMIM][BF4]	[BMIM]	[BF4]	298.15	13	1	1	4	2	0	0	0	0	0	0	0	0	0	0	0	0	0	0	0	1	0	1	0	0	0	0	0	0	0	0	0	0	1	0	0	0	4	0	0	0	0	0	0	0.185
[BMIM][BF4]	[BMIM]	[BF4]	298.15	13	1	1	4	2	0	0	0	0	0	0	0	0	0	0	0	0	0	0	0	1	0	1	0	0	0	0	0	0	0	0	0	0	1	0	0	0	4	0	0	0	0	0	0	0.185
[BMIM][BF4]	[BMIM]	[BF4]	323.15	13	1	1	4	2	0	0	0	0	0	0	0	0	0	0	0	0	0	0	0	1	0	1	0	0	0	0	0	0	0	0	0	0	1	0	0	0	4	0	0	0	0	0	0	0.123
[BMIM][BF4]	[BMIM]	[BF4]	323.15	13	1	1	4	2	0	0	0	0	0	0	0	0	0	0	0	0	0	0	0	1	0	1	0	0	0	0	0	0	0	0	0	0	1	0	0	0	4	0	0	0	0	0	0	0.123
[BMIM][BF4]	[BMIM]	[BF4]	323.15	13	1	1	4	2	0	0	0	0	0	0	0	0	0	0	0	0	0	0	0	1	0	1	0	0	0	0	0	0	0	0	0	0	1	0	0	0	4	0	0	0	0	0	0	0.125
[BMIM][BF4]	[BMIM]	[BF4]	323.15	13	1	1	4	2	0	0	0	0	0	0	0	0	0	0	0	0	0	0	0	1	0	1	0	0	0	0	0	0	0	0	0	0	1	0	0	0	4	0	0	0	0	0	0	0.125
[BMIM][BF4]	[BMIM]	[BF4]	283.15	12	1	1	4	2	0	0	0	0	0	0	0	0	0	0	0	0	0	0	0	1	0	1	0	0	0	0	0	0	0	0	0	0	1	0	0	0	4	0	0	0	0	0	0	0.228
[BMIM][BF4]	[BMIM]	[BF4]	298.15	12	1	1	4	2	0	0	0	0	0	0	0	0	0	0	0	0	0	0	0	1	0	1	0	0	0	0	0	0	0	0	0	0	1	0	0	0	4	0	0	0	0	0	0	0.17
[BMIM][BF4]	[BMIM]	[BF4]	298.15	12	1	1	4	2	0	0	0	0	0	0	0	0	0	0	0	0	0	0	0	1	0	1	0	0	0	0	0	0	0	0	0	0	1	0	0	0	4	0	0	0	0	0	0	0.173
[BMIM][BF4]	[BMIM]	[BF4]	323.15	12	1	1	4	2	0	0	0	0	0	0	0	0	0	0	0	0	0	0	0	1	0	1	0	0	0	0	0	0	0	0	0	0	1	0	0	0	4	0	0	0	0	0	0	0.116
[BMIM][BF4]	[BMIM]	[BF4]	323.15	12	1	1	4	2	0	0	0	0	0	0	0	0	0	0	0	0	0	0	0	1	0	1	0	0	0	0	0	0	0	0	0	0	1	0	0	0	4	0	0	0	0	0	0	0.117
[BMIM][BF4]	[BMIM]	[BF4]	283.15	11	1	1	4	2	0	0	0	0	0	0	0	0	0	0	0	0	0	0	0	1	0	1	0	0	0	0	0	0	0	0	0	0	1	0	0	0	4	0	0	0	0	0	0	0.213
[BMIM][BF4]	[BMIM]	[BF4]	283.15	11	1	1	4	2	0	0	0	0	0	0	0	0	0	0	0	0	0	0	0	1	0	1	0	0	0	0	0	0	0	0	0	0	1	0	0	0	4	0	0	0	0	0	0	0.22
[BMIM][BF4]	[BMIM]	[BF4]	298.15	11	1	1	4	2	0	0	0	0	0	0	0	0	0	0	0	0	0	0	0	1	0	1	0	0	0	0	0	0	0	0	0	0	1	0	0	0	4	0	0	0	0	0	0	0.158
[BMIM][BF4]	[BMIM]	[BF4]	298.15	11	1	1	4	2	0	0	0	0	0	0	0	0	0	0	0	0	0	0	0	1	0	1	0	0	0	0	0	0	0	0	0	0	1	0	0	0	4	0	0	0	0	0	0	0.161
[BMIM][BF4]	[BMIM]	[BF4]	298.15	11	1	1	4	2	0	0	0	0	0	0	0	0	0	0	0	0	0	0	0	1	0	1	0	0	0	0	0	0	0	0	0	0	1	0	0	0	4	0	0	0	0	0	0	0.164
[BMIM][BF4]	[BMIM]	[BF4]	298.15	11	1	1	4	2	0	0	0	0	0	0	0	0	0	0	0	0	0	0	0	1	0	1	0	0	0	0	0	0	0	0	0	0	1	0	0	0	4	0	0	0	0	0	0	0.167
[BMIM][BF4]	[BMIM]	[BF4]	323.15	11	1	1	4	2	0	0	0	0	0	0	0	0	0	0	0	0	0	0	0	1	0	1	0	0	0	0	0	0	0	0	0	0	1	0	0	0	4	0	0	0	0	0	0	0.105
[BMIM][BF4]	[BMIM]	[BF4]	323.15	11	1	1	4	2	0	0	0	0	0	0	0	0	0	0	0	0	0	0	0	1	0	1	0	0	0	0	0	0	0	0	0	0	1	0	0	0	4	0	0	0	0	0	0	0.107
[BMIM][BF4]	[BMIM]	[BF4]	323.15	11	1	1	4	2	0	0	0	0	0	0	0	0	0	0	0	0	0	0	0	1	0	1	0	0	0	0	0	0	0	0	0	0	1	0	0	0	4	0	0	0	0	0	0	0.108
[BMIM][BF4]	[BMIM]	[BF4]	323.15	11	1	1	4	2	0	0	0	0	0	0	0	0	0	0	0	0	0	0	0	1	0	1	0	0	0	0	0	0	0	0	0	0	1	0	0	0	4	0	0	0	0	0	0	0.11
[BMIM][BF4]	[BMIM]	[BF4]	283.15	10	1	1	4	2	0	0	0	0	0	0	0	0	0	0	0	0	0	0	0	1	0	1	0	0	0	0	0	0	0	0	0	0	1	0	0	0	4	0	0	0	0	0	0	0.196
[BMIM][BF4]	[BMIM]	[BF4]	298.15	10	1	1	4	2	0	0	0	0	0	0	0	0	0	0	0	0	0	0	0	1	0	1	0	0	0	0	0	0	0	0	0	0	1	0	0	0	4	0	0	0	0	0	0	0.145
[BMIM][BF4]	[BMIM]	[BF4]	298.15	10	1	1	4	2	0	0	0	0	0	0	0	0	0	0	0	0	0	0	0	1	0	1	0	0	0	0	0	0	0	0	0	0	1	0	0	0	4	0	0	0	0	0	0	0.149
[BMIM][BF4]	[BMIM]	[BF4]	323.15	10	1	1	4	2	0	0	0	0	0	0	0	0	0	0	0	0	0	0	0	1	0	1	0	0	0	0	0	0	0	0	0	0	1	0	0	0	4	0	0	0	0	0	0	0.101
[BMIM][BF4]	[BMIM]	[BF4]	323.15	9.99	1	1	4	2	0	0	0	0	0	0	0	0	0	0	0	0	0	0	0	1	0	1	0	0	0	0	0	0	0	0	0	0	1	0	0	0	4	0	0	0	0	0	0	0.0992
[BMIM][BF4]	[BMIM]	[BF4]	283.15	9	1	1	4	2	0	0	0	0	0	0	0	0	0	0	0	0	0	0	0	1	0	1	0	0	0	0	0	0	0	0	0	0	1	0	0	0	4	0	0	0	0	0	0	0.19
[BMIM][BF4]	[BMIM]	[BF4]	298.15	9	1	1	4	2	0	0	0	0	0	0	0	0	0	0	0	0	0	0	0	1	0	1	0	0	0	0	0	0	0	0	0	0	1	0	0	0	4	0	0	0	0	0	0	0.139
[BMIM][BF4]	[BMIM]	[BF4]	323.15	9	1	1	4	2	0	0	0	0	0	0	0	0	0	0	0	0	0	0	0	1	0	1	0	0	0	0	0	0	0	0	0	0	1	0	0	0	4	0	0	0	0	0	0	0.0901
[BMIM][BF4]	[BMIM]	[BF4]	283.15	8.5	1	1	4	2	0	0	0	0	0	0	0	0	0	0	0	0	0	0	0	1	0	1	0	0	0	0	0	0	0	0	0	0	1	0	0	0	4	0	0	0	0	0	0	0.171
[BMIM][BF4]	[BMIM]	[BF4]	298.15	8.5	1	1	4	2	0	0	0	0	0	0	0	0	0	0	0	0	0	0	0	1	0	1	0	0	0	0	0	0	0	0	0	0	1	0	0	0	4	0	0	0	0	0	0	0.125
[BMIM][BF4]	[BMIM]	[BF4]	298.15	8.5	1	1	4	2	0	0	0	0	0	0	0	0	0	0	0	0	0	0	0	1	0	1	0	0	0	0	0	0	0	0	0	0	1	0	0	0	4	0	0	0	0	0	0	0.13
[BMIM][BF4]	[BMIM]	[BF4]	323.15	8.5	1	1	4	2	0	0	0	0	0	0	0	0	0	0	0	0	0	0	0	1	0	1	0	0	0	0	0	0	0	0	0	0	1	0	0	0	4	0	0	0	0	0	0	0.0847
[BMIM][BF4]	[BMIM]	[BF4]	323.15	8.49	1	1	4	2	0	0	0	0	0	0	0	0	0	0	0	0	0	0	0	1	0	1	0	0	0	0	0	0	0	0	0	0	1	0	0	0	4	0	0	0	0	0	0	0.0867
[BMIM][BF4]	[BMIM]	[BF4]	283.15	7	1	1	4	2	0	0	0	0	0	0	0	0	0	0	0	0	0	0	0	1	0	1	0	0	0	0	0	0	0	0	0	0	1	0	0	0	4	0	0	0	0	0	0	0.144
[BMIM][BF4]	[BMIM]	[BF4]	298.15	7	1	1	4	2	0	0	0	0	0	0	0	0	0	0	0	0	0	0	0	1	0	1	0	0	0	0	0	0	0	0	0	0	1	0	0	0	4	0	0	0	0	0	0	0.104
[BMIM][BF4]	[BMIM]	[BF4]	298.15	7	1	1	4	2	0	0	0	0	0	0	0	0	0	0	0	0	0	0	0	1	0	1	0	0	0	0	0	0	0	0	0	0	1	0	0	0	4	0	0	0	0	0	0	0.11
[BMIM][BF4]	[BMIM]	[BF4]	323.15	7	1	1	4	2	0	0	0	0	0	0	0	0	0	0	0	0	0	0	0	1	0	1	0	0	0	0	0	0	0	0	0	0	1	0	0	0	4	0	0	0	0	0	0	0.0722
[BMIM][BF4]	[BMIM]	[BF4]	323.15	7	1	1	4	2	0	0	0	0	0	0	0	0	0	0	0	0	0	0	0	1	0	1	0	0	0	0	0	0	0	0	0	0	1	0	0	0	4	0	0	0	0	0	0	0.0738
[BMIM][BF4]	[BMIM]	[BF4]	283.15	6	1	1	4	2	0	0	0	0	0	0	0	0	0	0	0	0	0	0	0	1	0	1	0	0	0	0	0	0	0	0	0	0	1	0	0	0	4	0	0	0	0	0	0	0.14
[BMIM][BF4]	[BMIM]	[BF4]	323.15	6	1	1	4	2	0	0	0	0	0	0	0	0	0	0	0	0	0	0	0	1	0	1	0	0	0	0	0	0	0	0	0	0	1	0	0	0	4	0	0	0	0	0	0	0.0627
[BMIM][BF4]	[BMIM]	[BF4]	298.15	6	1	1	4	2	0	0	0	0	0	0	0	0	0	0	0	0	0	0	0	1	0	1	0	0	0	0	0	0	0	0	0	0	1	0	0	0	4	0	0	0	0	0	0	0.108
[BMIM][BF4]	[BMIM]	[BF4]	323.15	6	1	1	4	2	0	0	0	0	0	0	0	0	0	0	0	0	0	0	0	1	0	1	0	0	0	0	0	0	0	0	0	0	1	0	0	0	4	0	0	0	0	0	0	0.0664
[BMIM][BF4]	[BMIM]	[BF4]	283.15	5.5	1	1	4	2	0	0	0	0	0	0	0	0	0	0	0	0	0	0	0	1	0	1	0	0	0	0	0	0	0	0	0	0	1	0	0	0	4	0	0	0	0	0	0	0.115
[BMIM][BF4]	[BMIM]	[BF4]	298.15	5.5	1	1	4	2	0	0	0	0	0	0	0	0	0	0	0	0	0	0	0	1	0	1	0	0	0	0	0	0	0	0	0	0	1	0	0	0	4	0	0	0	0	0	0	0.0818
[BMIM][BF4]	[BMIM]	[BF4]	298.15	5.5	1	1	4	2	0	0	0	0	0	0	0	0	0	0	0	0	0	0	0	1	0	1	0	0	0	0	0	0	0	0	0	0	1	0	0	0	4	0	0	0	0	0	0	0.0877
[BMIM][BF4]	[BMIM]	[BF4]	323.15	5.5	1	1	4	2	0	0	0	0	0	0	0	0	0	0	0	0	0	0	0	1	0	1	0	0	0	0	0	0	0	0	0	0	1	0	0	0	4	0	0	0	0	0	0	0.0573
[BMIM][BF4]	[BMIM]	[BF4]	323.15	5.5	1	1	4	2	0	0	0	0	0	0	0	0	0	0	0	0	0	0	0	1	0	1	0	0	0	0	0	0	0	0	0	0	1	0	0	0	4	0	0	0	0	0	0	0.0577
[BMIM][BF4]	[BMIM]	[BF4]	283.15	5	1	1	4	2	0	0	0	0	0	0	0	0	0	0	0	0	0	0	0	1	0	1	0	0	0	0	0	0	0	0	0	0	1	0	0	0	4	0	0	0	0	0	0	0.117
[BMIM][BF4]	[BMIM]	[BF4]	283.15	4	1	1	4	2	0	0	0	0	0	0	0	0	0	0	0	0	0	0	0	1	0	1	0	0	0	0	0	0	0	0	0	0	1	0	0	0	4	0	0	0	0	0	0	0.0831
[BMIM][BF4]	[BMIM]	[BF4]	298.15	4	1	1	4	2	0	0	0	0	0	0	0	0	0	0	0	0	0	0	0	1	0	1	0	0	0	0	0	0	0	0	0	0	1	0	0	0	4	0	0	0	0	0	0	0.0588
[BMIM][BF4]	[BMIM]	[BF4]	298.15	4	1	1	4	2	0	0	0	0	0	0	0	0	0	0	0	0	0	0	0	1	0	1	0	0	0	0	0	0	0	0	0	0	1	0	0	0	4	0	0	0	0	0	0	0.0649
[BMIM][BF4]	[BMIM]	[BF4]	323.15	4	1	1	4	2	0	0	0	0	0	0	0	0	0	0	0	0	0	0	0	1	0	1	0	0	0	0	0	0	0	0	0	0	1	0	0	0	4	0	0	0	0	0	0	0.041
[BMIM][BF4]	[BMIM]	[BF4]	323.15	4	1	1	4	2	0	0	0	0	0	0	0	0	0	0	0	0	0	0	0	1	0	1	0	0	0	0	0	0	0	0	0	0	1	0	0	0	4	0	0	0	0	0	0	0.0443
[BMIM][BF4]	[BMIM]	[BF4]	298.15	2.5	1	1	4	2	0	0	0	0	0	0	0	0	0	0	0	0	0	0	0	1	0	1	0	0	0	0	0	0	0	0	0	0	1	0	0	0	4	0	0	0	0	0	0	0.035
[BMIM][BF4]	[BMIM]	[BF4]	283.15	2.5	1	1	4	2	0	0	0	0	0	0	0	0	0	0	0	0	0	0	0	1	0	1	0	0	0	0	0	0	0	0	0	0	1	0	0	0	4	0	0	0	0	0	0	0.0506
[BMIM][BF4]	[BMIM]	[BF4]	298.15	2.5	1	1	4	2	0	0	0	0	0	0	0	0	0	0	0	0	0	0	0	1	0	1	0	0	0	0	0	0	0	0	0	0	1	0	0	0	4	0	0	0	0	0	0	0.0405
[BMIM][BF4]	[BMIM]	[BF4]	323.15	2.5	1	1	4	2	0	0	0	0	0	0	0	0	0	0	0	0	0	0	0	1	0	1	0	0	0	0	0	0	0	0	0	0	1	0	0	0	4	0	0	0	0	0	0	0.0256
[BMIM][BF4]	[BMIM]	[BF4]	323.15	2.5	1	1	4	2	0	0	0	0	0	0	0	0	0	0	0	0	0	0	0	1	0	1	0	0	0	0	0	0	0	0	0	0	1	0	0	0	4	0	0	0	0	0	0	0.0261
[BMIM][BF4]	[BMIM]	[BF4]	298.15	0.999	1	1	4	2	0	0	0	0	0	0	0	0	0	0	0	0	0	0	0	1	0	1	0	0	0	0	0	0	0	0	0	0	1	0	0	0	4	0	0	0	0	0	0	0.0134
[BMIM][BF4]	[BMIM]	[BF4]	283.15	0.999	1	1	4	2	0	0	0	0	0	0	0	0	0	0	0	0	0	0	0	1	0	1	0	0	0	0	0	0	0	0	0	0	1	0	0	0	4	0	0	0	0	0	0	0.0197
[BMIM][BF4]	[BMIM]	[BF4]	298.15	0.999	1	1	4	2	0	0	0	0	0	0	0	0	0	0	0	0	0	0	0	1	0	1	0	0	0	0	0	0	0	0	0	0	1	0	0	0	4	0	0	0	0	0	0	0.0161
[BMIM][BF4]	[BMIM]	[BF4]	323.15	0.999	1	1	4	2	0	0	0	0	0	0	0	0	0	0	0	0	0	0	0	1	0	1	0	0	0	0	0	0	0	0	0	0	1	0	0	0	4	0	0	0	0	0	0	0.0104
[BMIM][BF4]	[BMIM]	[BF4]	323.15	0.999	1	1	4	2	0	0	0	0	0	0	0	0	0	0	0	0	0	0	0	1	0	1	0	0	0	0	0	0	0	0	0	0	1	0	0	0	4	0	0	0	0	0	0	0.0117
[BMIM][BF4]	[BMIM]	[BF4]	298.15	0.502	1	1	4	2	0	0	0	0	0	0	0	0	0	0	0	0	0	0	0	1	0	1	0	0	0	0	0	0	0	0	0	0	1	0	0	0	4	0	0	0	0	0	0	0.00567
[BMIM][BF4]	[BMIM]	[BF4]	323.15	0.5	1	1	4	2	0	0	0	0	0	0	0	0	0	0	0	0	0	0	0	1	0	1	0	0	0	0	0	0	0	0	0	0	1	0	0	0	4	0	0	0	0	0	0	0.00496
[BMIM][BF4]	[BMIM]	[BF4]	283.15	0.499	1	1	4	2	0	0	0	0	0	0	0	0	0	0	0	0	0	0	0	1	0	1	0	0	0	0	0	0	0	0	0	0	1	0	0	0	4	0	0	0	0	0	0	0.00893
[BMIM][BF4]	[BMIM]	[BF4]	298.15	0.499	1	1	4	2	0	0	0	0	0	0	0	0	0	0	0	0	0	0	0	1	0	1	0	0	0	0	0	0	0	0	0	0	1	0	0	0	4	0	0	0	0	0	0	0.00774
[BMIM][BF4]	[BMIM]	[BF4]	323.15	0.499	1	1	4	2	0	0	0	0	0	0	0	0	0	0	0	0	0	0	0	1	0	1	0	0	0	0	0	0	0	0	0	0	1	0	0	0	4	0	0	0	0	0	0	0.00587
[BMIM][BF4]	[BMIM]	[BF4]	298.15	0.1	1	1	4	2	0	0	0	0	0	0	0	0	0	0	0	0	0	0	0	1	0	1	0	0	0	0	0	0	0	0	0	0	1	0	0	0	4	0	0	0	0	0	0	0.000995
[BMIM][BF4]	[BMIM]	[BF4]	298.15	0.0995	1	1	4	2	0	0	0	0	0	0	0	0	0	0	0	0	0	0	0	1	0	1	0	0	0	0	0	0	0	0	0	0	1	0	0	0	4	0	0	0	0	0	0	0.00124
[BMIM][BF4]	[BMIM]	[BF4]	323.15	0.0993	1	1	4	2	0	0	0	0	0	0	0	0	0	0	0	0	0	0	0	1	0	1	0	0	0	0	0	0	0	0	0	0	1	0	0	0	4	0	0	0	0	0	0	0.00133
[BMIM][BF4]	[BMIM]	[BF4]	283.15	0.0992	1	1	4	2	0	0	0	0	0	0	0	0	0	0	0	0	0	0	0	1	0	1	0	0	0	0	0	0	0	0	0	0	1	0	0	0	4	0	0	0	0	0	0	0.00165
[BMIM][BF4]	[BMIM]	[BF4]	323.15	0.0991	1	1	4	2	0	0	0	0	0	0	0	0	0	0	0	0	0	0	0	1	0	1	0	0	0	0	0	0	0	0	0	0	1	0	0	0	4	0	0	0	0	0	0	0.000776
[BMIM][BF4]	[BMIM]	[BF4]	298.15	0.0495	1	1	4	2	0	0	0	0	0	0	0	0	0	0	0	0	0	0	0	1	0	1	0	0	0	0	0	0	0	0	0	0	1	0	0	0	4	0	0	0	0	0	0	0.000374
[BMIM][BF4]	[BMIM]	[BF4]	323.15	0.0493	1	1	4	2	0	0	0	0	0	0	0	0	0	0	0	0	0	0	0	1	0	1	0	0	0	0	0	0	0	0	0	0	1	0	0	0	4	0	0	0	0	0	0	0.000275
[BMIM][BF4]	[BMIM]	[BF4]	298.15	0.0482	1	1	4	2	0	0	0	0	0	0	0	0	0	0	0	0	0	0	0	1	0	1	0	0	0	0	0	0	0	0	0	0	1	0	0	0	4	0	0	0	0	0	0	0.00018
[BMIM][BF4]	[BMIM]	[BF4]	323.15	0.0481	1	1	4	2	0	0	0	0	0	0	0	0	0	0	0	0	0	0	0	1	0	1	0	0	0	0	0	0	0	0	0	0	1	0	0	0	4	0	0	0	0	0	0	0.000683
[BMIM][BF4]	[BMIM]	[BF4]	283.15	0.048	1	1	4	2	0	0	0	0	0	0	0	0	0	0	0	0	0	0	0	1	0	1	0	0	0	0	0	0	0	0	0	0	1	0	0	0	4	0	0	0	0	0	0	0.000574
[BMIM][BF4]	[BMIM]	[BF4]	298.15	0.0153	1	1	4	2	0	0	0	0	0	0	0	0	0	0	0	0	0	0	0	1	0	1	0	0	0	0	0	0	0	0	0	0	1	0	0	0	4	0	0	0	0	0	0	0.000472
[BMIM][BF4]	[BMIM]	[BF4]	298.15	0.0114	1	1	4	2	0	0	0	0	0	0	0	0	0	0	0	0	0	0	0	1	0	1	0	0	0	0	0	0	0	0	0	0	1	0	0	0	4	0	0	0	0	0	0	0.000319
[BMIM][BF4]	[BMIM]	[BF4]	323.15	0.0111	1	1	4	2	0	0	0	0	0	0	0	0	0	0	0	0	0	0	0	1	0	1	0	0	0	0	0	0	0	0	0	0	1	0	0	0	4	0	0	0	0	0	0	7.28e-05
[BMIM][BF4]	[BMIM]	[BF4]	323.15	0.01	1	1	4	2	0	0	0	0	0	0	0	0	0	0	0	0	0	0	0	1	0	1	0	0	0	0	0	0	0	0	0	0	1	0	0	0	4	0	0	0	0	0	0	0.000197
[BMIM][BF4]	[BMIM]	[BF4]	283.15	0.00991	1	1	4	2	0	0	0	0	0	0	0	0	0	0	0	0	0	0	0	1	0	1	0	0	0	0	0	0	0	0	0	0	1	0	0	0	4	0	0	0	0	0	0	0.000142
[BMIM][PF6]	[BMIM]	[PF6]	283.15	13	1	1	4	2	0	0	0	0	0	0	0	0	0	0	0	0	0	0	0	1	0	0	0	0	1	0	0	0	0	0	0	0	1	0	0	0	6	0	0	0	0	0	0	0.262
[BMIM][PF6]	[BMIM]	[PF6]	283.15	13	1	1	4	2	0	0	0	0	0	0	0	0	0	0	0	0	0	0	0	1	0	0	0	0	1	0	0	0	0	0	0	0	1	0	0	0	6	0	0	0	0	0	0	0.262
[BMIM][PF6]	[BMIM]	[PF6]	298.15	13	1	1	4	2	0	0	0	0	0	0	0	0	0	0	0	0	0	0	0	1	0	0	0	0	1	0	0	0	0	0	0	0	1	0	0	0	6	0	0	0	0	0	0	0.2
[BMIM][PF6]	[BMIM]	[PF6]	298.15	13	1	1	4	2	0	0	0	0	0	0	0	0	0	0	0	0	0	0	0	1	0	0	0	0	1	0	0	0	0	0	0	0	1	0	0	0	6	0	0	0	0	0	0	0.2
[BMIM][PF6]	[BMIM]	[PF6]	323.15	13	1	1	4	2	0	0	0	0	0	0	0	0	0	0	0	0	0	0	0	1	0	0	0	0	1	0	0	0	0	0	0	0	1	0	0	0	6	0	0	0	0	0	0	0.134
[BMIM][PF6]	[BMIM]	[PF6]	323.15	13	1	1	4	2	0	0	0	0	0	0	0	0	0	0	0	0	0	0	0	1	0	0	0	0	1	0	0	0	0	0	0	0	1	0	0	0	6	0	0	0	0	0	0	0.134
[BMIM][PF6]	[BMIM]	[PF6]	283.15	12.5	1	1	4	2	0	0	0	0	0	0	0	0	0	0	0	0	0	0	0	1	0	0	0	0	1	0	0	0	0	0	0	0	1	0	0	0	6	0	0	0	0	0	0	0.254
[BMIM][PF6]	[BMIM]	[PF6]	283.15	12.5	1	1	4	2	0	0	0	0	0	0	0	0	0	0	0	0	0	0	0	1	0	0	0	0	1	0	0	0	0	0	0	0	1	0	0	0	6	0	0	0	0	0	0	0.254
[BMIM][PF6]	[BMIM]	[PF6]	298.15	12.5	1	1	4	2	0	0	0	0	0	0	0	0	0	0	0	0	0	0	0	1	0	0	0	0	1	0	0	0	0	0	0	0	1	0	0	0	6	0	0	0	0	0	0	0.193
[BMIM][PF6]	[BMIM]	[PF6]	298.15	12.5	1	1	4	2	0	0	0	0	0	0	0	0	0	0	0	0	0	0	0	1	0	0	0	0	1	0	0	0	0	0	0	0	1	0	0	0	6	0	0	0	0	0	0	0.194
[BMIM][PF6]	[BMIM]	[PF6]	323.15	12.5	1	1	4	2	0	0	0	0	0	0	0	0	0	0	0	0	0	0	0	1	0	0	0	0	1	0	0	0	0	0	0	0	1	0	0	0	6	0	0	0	0	0	0	0.129
[BMIM][PF6]	[BMIM]	[PF6]	323.15	12.5	1	1	4	2	0	0	0	0	0	0	0	0	0	0	0	0	0	0	0	1	0	0	0	0	1	0	0	0	0	0	0	0	1	0	0	0	6	0	0	0	0	0	0	0.13
[BMIM][PF6]	[BMIM]	[PF6]	283.15	12	1	1	4	2	0	0	0	0	0	0	0	0	0	0	0	0	0	0	0	1	0	0	0	0	1	0	0	0	0	0	0	0	1	0	0	0	6	0	0	0	0	0	0	0.246
[BMIM][PF6]	[BMIM]	[PF6]	283.15	12	1	1	4	2	0	0	0	0	0	0	0	0	0	0	0	0	0	0	0	1	0	0	0	0	1	0	0	0	0	0	0	0	1	0	0	0	6	0	0	0	0	0	0	0.246
[BMIM][PF6]	[BMIM]	[PF6]	298.15	12	1	1	4	2	0	0	0	0	0	0	0	0	0	0	0	0	0	0	0	1	0	0	0	0	1	0	0	0	0	0	0	0	1	0	0	0	6	0	0	0	0	0	0	0.186
[BMIM][PF6]	[BMIM]	[PF6]	298.15	12	1	1	4	2	0	0	0	0	0	0	0	0	0	0	0	0	0	0	0	1	0	0	0	0	1	0	0	0	0	0	0	0	1	0	0	0	6	0	0	0	0	0	0	0.187
[BMIM][PF6]	[BMIM]	[PF6]	323.15	12	1	1	4	2	0	0	0	0	0	0	0	0	0	0	0	0	0	0	0	1	0	0	0	0	1	0	0	0	0	0	0	0	1	0	0	0	6	0	0	0	0	0	0	0.125
[BMIM][PF6]	[BMIM]	[PF6]	323.15	12	1	1	4	2	0	0	0	0	0	0	0	0	0	0	0	0	0	0	0	1	0	0	0	0	1	0	0	0	0	0	0	0	1	0	0	0	6	0	0	0	0	0	0	0.126
[BMIM][PF6]	[BMIM]	[PF6]	283.15	11.5	1	1	4	2	0	0	0	0	0	0	0	0	0	0	0	0	0	0	0	1	0	0	0	0	1	0	0	0	0	0	0	0	1	0	0	0	6	0	0	0	0	0	0	0.238
[BMIM][PF6]	[BMIM]	[PF6]	283.15	11.5	1	1	4	2	0	0	0	0	0	0	0	0	0	0	0	0	0	0	0	1	0	0	0	0	1	0	0	0	0	0	0	0	1	0	0	0	6	0	0	0	0	0	0	0.238
[BMIM][PF6]	[BMIM]	[PF6]	298.15	11.5	1	1	4	2	0	0	0	0	0	0	0	0	0	0	0	0	0	0	0	1	0	0	0	0	1	0	0	0	0	0	0	0	1	0	0	0	6	0	0	0	0	0	0	0.181
[BMIM][PF6]	[BMIM]	[PF6]	298.15	11.5	1	1	4	2	0	0	0	0	0	0	0	0	0	0	0	0	0	0	0	1	0	0	0	0	1	0	0	0	0	0	0	0	1	0	0	0	6	0	0	0	0	0	0	0.181
[BMIM][PF6]	[BMIM]	[PF6]	323.15	11.5	1	1	4	2	0	0	0	0	0	0	0	0	0	0	0	0	0	0	0	1	0	0	0	0	1	0	0	0	0	0	0	0	1	0	0	0	6	0	0	0	0	0	0	0.121
[BMIM][PF6]	[BMIM]	[PF6]	323.15	11.5	1	1	4	2	0	0	0	0	0	0	0	0	0	0	0	0	0	0	0	1	0	0	0	0	1	0	0	0	0	0	0	0	1	0	0	0	6	0	0	0	0	0	0	0.121
[BMIM][PF6]	[BMIM]	[PF6]	283.15	11	1	1	4	2	0	0	0	0	0	0	0	0	0	0	0	0	0	0	0	1	0	0	0	0	1	0	0	0	0	0	0	0	1	0	0	0	6	0	0	0	0	0	0	0.23
[BMIM][PF6]	[BMIM]	[PF6]	283.15	11	1	1	4	2	0	0	0	0	0	0	0	0	0	0	0	0	0	0	0	1	0	0	0	0	1	0	0	0	0	0	0	0	1	0	0	0	6	0	0	0	0	0	0	0.23
[BMIM][PF6]	[BMIM]	[PF6]	298.15	11	1	1	4	2	0	0	0	0	0	0	0	0	0	0	0	0	0	0	0	1	0	0	0	0	1	0	0	0	0	0	0	0	1	0	0	0	6	0	0	0	0	0	0	0.174
[BMIM][PF6]	[BMIM]	[PF6]	298.15	11	1	1	4	2	0	0	0	0	0	0	0	0	0	0	0	0	0	0	0	1	0	0	0	0	1	0	0	0	0	0	0	0	1	0	0	0	6	0	0	0	0	0	0	0.175
[BMIM][PF6]	[BMIM]	[PF6]	323.15	11	1	1	4	2	0	0	0	0	0	0	0	0	0	0	0	0	0	0	0	1	0	0	0	0	1	0	0	0	0	0	0	0	1	0	0	0	6	0	0	0	0	0	0	0.117
[BMIM][PF6]	[BMIM]	[PF6]	323.15	11	1	1	4	2	0	0	0	0	0	0	0	0	0	0	0	0	0	0	0	1	0	0	0	0	1	0	0	0	0	0	0	0	1	0	0	0	6	0	0	0	0	0	0	0.117
[BMIM][PF6]	[BMIM]	[PF6]	283.15	10.5	1	1	4	2	0	0	0	0	0	0	0	0	0	0	0	0	0	0	0	1	0	0	0	0	1	0	0	0	0	0	0	0	1	0	0	0	6	0	0	0	0	0	0	0.221
[BMIM][PF6]	[BMIM]	[PF6]	283.15	10.5	1	1	4	2	0	0	0	0	0	0	0	0	0	0	0	0	0	0	0	1	0	0	0	0	1	0	0	0	0	0	0	0	1	0	0	0	6	0	0	0	0	0	0	0.222
[BMIM][PF6]	[BMIM]	[PF6]	298.15	10.5	1	1	4	2	0	0	0	0	0	0	0	0	0	0	0	0	0	0	0	1	0	0	0	0	1	0	0	0	0	0	0	0	1	0	0	0	6	0	0	0	0	0	0	0.167
[BMIM][PF6]	[BMIM]	[PF6]	298.15	10.5	1	1	4	2	0	0	0	0	0	0	0	0	0	0	0	0	0	0	0	1	0	0	0	0	1	0	0	0	0	0	0	0	1	0	0	0	6	0	0	0	0	0	0	0.168
[BMIM][PF6]	[BMIM]	[PF6]	323.15	10.5	1	1	4	2	0	0	0	0	0	0	0	0	0	0	0	0	0	0	0	1	0	0	0	0	1	0	0	0	0	0	0	0	1	0	0	0	6	0	0	0	0	0	0	0.112
[BMIM][PF6]	[BMIM]	[PF6]	323.15	10.5	1	1	4	2	0	0	0	0	0	0	0	0	0	0	0	0	0	0	0	1	0	0	0	0	1	0	0	0	0	0	0	0	1	0	0	0	6	0	0	0	0	0	0	0.113
[BMIM][PF6]	[BMIM]	[PF6]	283.15	10	1	1	4	2	0	0	0	0	0	0	0	0	0	0	0	0	0	0	0	1	0	0	0	0	1	0	0	0	0	0	0	0	1	0	0	0	6	0	0	0	0	0	0	0.213
[BMIM][PF6]	[BMIM]	[PF6]	283.15	10	1	1	4	2	0	0	0	0	0	0	0	0	0	0	0	0	0	0	0	1	0	0	0	0	1	0	0	0	0	0	0	0	1	0	0	0	6	0	0	0	0	0	0	0.214
[BMIM][PF6]	[BMIM]	[PF6]	298.15	10	1	1	4	2	0	0	0	0	0	0	0	0	0	0	0	0	0	0	0	1	0	0	0	0	1	0	0	0	0	0	0	0	1	0	0	0	6	0	0	0	0	0	0	0.16
[BMIM][PF6]	[BMIM]	[PF6]	298.15	10	1	1	4	2	0	0	0	0	0	0	0	0	0	0	0	0	0	0	0	1	0	0	0	0	1	0	0	0	0	0	0	0	1	0	0	0	6	0	0	0	0	0	0	0.161
[BMIM][PF6]	[BMIM]	[PF6]	323.15	10	1	1	4	2	0	0	0	0	0	0	0	0	0	0	0	0	0	0	0	1	0	0	0	0	1	0	0	0	0	0	0	0	1	0	0	0	6	0	0	0	0	0	0	0.108
[BMIM][PF6]	[BMIM]	[PF6]	323.15	9.99	1	1	4	2	0	0	0	0	0	0	0	0	0	0	0	0	0	0	0	1	0	0	0	0	1	0	0	0	0	0	0	0	1	0	0	0	6	0	0	0	0	0	0	0.108
[BMIM][PF6]	[BMIM]	[PF6]	283.15	9.5	1	1	4	2	0	0	0	0	0	0	0	0	0	0	0	0	0	0	0	1	0	0	0	0	1	0	0	0	0	0	0	0	1	0	0	0	6	0	0	0	0	0	0	0.205
[BMIM][PF6]	[BMIM]	[PF6]	298.15	9.5	1	1	4	2	0	0	0	0	0	0	0	0	0	0	0	0	0	0	0	1	0	0	0	0	1	0	0	0	0	0	0	0	1	0	0	0	6	0	0	0	0	0	0	0.154
[BMIM][PF6]	[BMIM]	[PF6]	298.15	9.5	1	1	4	2	0	0	0	0	0	0	0	0	0	0	0	0	0	0	0	1	0	0	0	0	1	0	0	0	0	0	0	0	1	0	0	0	6	0	0	0	0	0	0	0.154
[BMIM][PF6]	[BMIM]	[PF6]	323.15	9.5	1	1	4	2	0	0	0	0	0	0	0	0	0	0	0	0	0	0	0	1	0	0	0	0	1	0	0	0	0	0	0	0	1	0	0	0	6	0	0	0	0	0	0	0.103
[BMIM][PF6]	[BMIM]	[PF6]	323.15	9.5	1	1	4	2	0	0	0	0	0	0	0	0	0	0	0	0	0	0	0	1	0	0	0	0	1	0	0	0	0	0	0	0	1	0	0	0	6	0	0	0	0	0	0	0.104
[BMIM][PF6]	[BMIM]	[PF6]	283.15	9.49	1	1	4	2	0	0	0	0	0	0	0	0	0	0	0	0	0	0	0	1	0	0	0	0	1	0	0	0	0	0	0	0	1	0	0	0	6	0	0	0	0	0	0	0.205
[BMIM][PF6]	[BMIM]	[PF6]	283.15	9	1	1	4	2	0	0	0	0	0	0	0	0	0	0	0	0	0	0	0	1	0	0	0	0	1	0	0	0	0	0	0	0	1	0	0	0	6	0	0	0	0	0	0	0.196
[BMIM][PF6]	[BMIM]	[PF6]	283.15	9	1	1	4	2	0	0	0	0	0	0	0	0	0	0	0	0	0	0	0	1	0	0	0	0	1	0	0	0	0	0	0	0	1	0	0	0	6	0	0	0	0	0	0	0.196
[BMIM][PF6]	[BMIM]	[PF6]	298.15	9	1	1	4	2	0	0	0	0	0	0	0	0	0	0	0	0	0	0	0	1	0	0	0	0	1	0	0	0	0	0	0	0	1	0	0	0	6	0	0	0	0	0	0	0.147
[BMIM][PF6]	[BMIM]	[PF6]	298.15	9	1	1	4	2	0	0	0	0	0	0	0	0	0	0	0	0	0	0	0	1	0	0	0	0	1	0	0	0	0	0	0	0	1	0	0	0	6	0	0	0	0	0	0	0.147
[BMIM][PF6]	[BMIM]	[PF6]	323.15	9	1	1	4	2	0	0	0	0	0	0	0	0	0	0	0	0	0	0	0	1	0	0	0	0	1	0	0	0	0	0	0	0	1	0	0	0	6	0	0	0	0	0	0	0.0983
[BMIM][PF6]	[BMIM]	[PF6]	323.15	9	1	1	4	2	0	0	0	0	0	0	0	0	0	0	0	0	0	0	0	1	0	0	0	0	1	0	0	0	0	0	0	0	1	0	0	0	6	0	0	0	0	0	0	0.0988
[BMIM][PF6]	[BMIM]	[PF6]	283.15	8.5	1	1	4	2	0	0	0	0	0	0	0	0	0	0	0	0	0	0	0	1	0	0	0	0	1	0	0	0	0	0	0	0	1	0	0	0	6	0	0	0	0	0	0	0.187
[BMIM][PF6]	[BMIM]	[PF6]	298.15	8.5	1	1	4	2	0	0	0	0	0	0	0	0	0	0	0	0	0	0	0	1	0	0	0	0	1	0	0	0	0	0	0	0	1	0	0	0	6	0	0	0	0	0	0	0.14
[BMIM][PF6]	[BMIM]	[PF6]	298.15	8.5	1	1	4	2	0	0	0	0	0	0	0	0	0	0	0	0	0	0	0	1	0	0	0	0	1	0	0	0	0	0	0	0	1	0	0	0	6	0	0	0	0	0	0	0.141
[BMIM][PF6]	[BMIM]	[PF6]	323.15	8.5	1	1	4	2	0	0	0	0	0	0	0	0	0	0	0	0	0	0	0	1	0	0	0	0	1	0	0	0	0	0	0	0	1	0	0	0	6	0	0	0	0	0	0	0.0934
[BMIM][PF6]	[BMIM]	[PF6]	323.15	8.5	1	1	4	2	0	0	0	0	0	0	0	0	0	0	0	0	0	0	0	1	0	0	0	0	1	0	0	0	0	0	0	0	1	0	0	0	6	0	0	0	0	0	0	0.0942
[BMIM][PF6]	[BMIM]	[PF6]	283.15	8.49	1	1	4	2	0	0	0	0	0	0	0	0	0	0	0	0	0	0	0	1	0	0	0	0	1	0	0	0	0	0	0	0	1	0	0	0	6	0	0	0	0	0	0	0.186
[BMIM][PF6]	[BMIM]	[PF6]	283.15	8	1	1	4	2	0	0	0	0	0	0	0	0	0	0	0	0	0	0	0	1	0	0	0	0	1	0	0	0	0	0	0	0	1	0	0	0	6	0	0	0	0	0	0	0.178
[BMIM][PF6]	[BMIM]	[PF6]	298.15	8	1	1	4	2	0	0	0	0	0	0	0	0	0	0	0	0	0	0	0	1	0	0	0	0	1	0	0	0	0	0	0	0	1	0	0	0	6	0	0	0	0	0	0	0.133
[BMIM][PF6]	[BMIM]	[PF6]	323.15	8	1	1	4	2	0	0	0	0	0	0	0	0	0	0	0	0	0	0	0	1	0	0	0	0	1	0	0	0	0	0	0	0	1	0	0	0	6	0	0	0	0	0	0	0.0886
[BMIM][PF6]	[BMIM]	[PF6]	323.15	8	1	1	4	2	0	0	0	0	0	0	0	0	0	0	0	0	0	0	0	1	0	0	0	0	1	0	0	0	0	0	0	0	1	0	0	0	6	0	0	0	0	0	0	0.0895
[BMIM][PF6]	[BMIM]	[PF6]	283.15	7.99	1	1	4	2	0	0	0	0	0	0	0	0	0	0	0	0	0	0	0	1	0	0	0	0	1	0	0	0	0	0	0	0	1	0	0	0	6	0	0	0	0	0	0	0.177
[BMIM][PF6]	[BMIM]	[PF6]	298.15	7.99	1	1	4	2	0	0	0	0	0	0	0	0	0	0	0	0	0	0	0	1	0	0	0	0	1	0	0	0	0	0	0	0	1	0	0	0	6	0	0	0	0	0	0	0.134
[BMIM][PF6]	[BMIM]	[PF6]	298.15	7.51	1	1	4	2	0	0	0	0	0	0	0	0	0	0	0	0	0	0	0	1	0	0	0	0	1	0	0	0	0	0	0	0	1	0	0	0	6	0	0	0	0	0	0	0.125
[BMIM][PF6]	[BMIM]	[PF6]	323.15	7.51	1	1	4	2	0	0	0	0	0	0	0	0	0	0	0	0	0	0	0	1	0	0	0	0	1	0	0	0	0	0	0	0	1	0	0	0	6	0	0	0	0	0	0	0.0833
[BMIM][PF6]	[BMIM]	[PF6]	283.15	7.5	1	1	4	2	0	0	0	0	0	0	0	0	0	0	0	0	0	0	0	1	0	0	0	0	1	0	0	0	0	0	0	0	1	0	0	0	6	0	0	0	0	0	0	0.168
[BMIM][PF6]	[BMIM]	[PF6]	283.15	7.5	1	1	4	2	0	0	0	0	0	0	0	0	0	0	0	0	0	0	0	1	0	0	0	0	1	0	0	0	0	0	0	0	1	0	0	0	6	0	0	0	0	0	0	0.168
[BMIM][PF6]	[BMIM]	[PF6]	298.15	7.5	1	1	4	2	0	0	0	0	0	0	0	0	0	0	0	0	0	0	0	1	0	0	0	0	1	0	0	0	0	0	0	0	1	0	0	0	6	0	0	0	0	0	0	0.126
[BMIM][PF6]	[BMIM]	[PF6]	323.15	7.5	1	1	4	2	0	0	0	0	0	0	0	0	0	0	0	0	0	0	0	1	0	0	0	0	1	0	0	0	0	0	0	0	1	0	0	0	6	0	0	0	0	0	0	0.0845
[BMIM][PF6]	[BMIM]	[PF6]	298.15	7.01	1	1	4	2	0	0	0	0	0	0	0	0	0	0	0	0	0	0	0	1	0	0	0	0	1	0	0	0	0	0	0	0	1	0	0	0	6	0	0	0	0	0	0	0.118
[BMIM][PF6]	[BMIM]	[PF6]	323.15	7.01	1	1	4	2	0	0	0	0	0	0	0	0	0	0	0	0	0	0	0	1	0	0	0	0	1	0	0	0	0	0	0	0	1	0	0	0	6	0	0	0	0	0	0	0.0787
[BMIM][PF6]	[BMIM]	[PF6]	283.15	7	1	1	4	2	0	0	0	0	0	0	0	0	0	0	0	0	0	0	0	1	0	0	0	0	1	0	0	0	0	0	0	0	1	0	0	0	6	0	0	0	0	0	0	0.158
[BMIM][PF6]	[BMIM]	[PF6]	283.15	7	1	1	4	2	0	0	0	0	0	0	0	0	0	0	0	0	0	0	0	1	0	0	0	0	1	0	0	0	0	0	0	0	1	0	0	0	6	0	0	0	0	0	0	0.159
[BMIM][PF6]	[BMIM]	[PF6]	298.15	7	1	1	4	2	0	0	0	0	0	0	0	0	0	0	0	0	0	0	0	1	0	0	0	0	1	0	0	0	0	0	0	0	1	0	0	0	6	0	0	0	0	0	0	0.119
[BMIM][PF6]	[BMIM]	[PF6]	323.15	6.99	1	1	4	2	0	0	0	0	0	0	0	0	0	0	0	0	0	0	0	1	0	0	0	0	1	0	0	0	0	0	0	0	1	0	0	0	6	0	0	0	0	0	0	0.0798
[BMIM][PF6]	[BMIM]	[PF6]	298.15	6.51	1	1	4	2	0	0	0	0	0	0	0	0	0	0	0	0	0	0	0	1	0	0	0	0	1	0	0	0	0	0	0	0	1	0	0	0	6	0	0	0	0	0	0	0.11
[BMIM][PF6]	[BMIM]	[PF6]	323.15	6.51	1	1	4	2	0	0	0	0	0	0	0	0	0	0	0	0	0	0	0	1	0	0	0	0	1	0	0	0	0	0	0	0	1	0	0	0	6	0	0	0	0	0	0	0.0737
[BMIM][PF6]	[BMIM]	[PF6]	283.15	6.5	1	1	4	2	0	0	0	0	0	0	0	0	0	0	0	0	0	0	0	1	0	0	0	0	1	0	0	0	0	0	0	0	1	0	0	0	6	0	0	0	0	0	0	0.148
[BMIM][PF6]	[BMIM]	[PF6]	283.15	6.5	1	1	4	2	0	0	0	0	0	0	0	0	0	0	0	0	0	0	0	1	0	0	0	0	1	0	0	0	0	0	0	0	1	0	0	0	6	0	0	0	0	0	0	0.149
[BMIM][PF6]	[BMIM]	[PF6]	298.15	6.5	1	1	4	2	0	0	0	0	0	0	0	0	0	0	0	0	0	0	0	1	0	0	0	0	1	0	0	0	0	0	0	0	1	0	0	0	6	0	0	0	0	0	0	0.11
[BMIM][PF6]	[BMIM]	[PF6]	323.15	6.5	1	1	4	2	0	0	0	0	0	0	0	0	0	0	0	0	0	0	0	1	0	0	0	0	1	0	0	0	0	0	0	0	1	0	0	0	6	0	0	0	0	0	0	0.0747
[BMIM][PF6]	[BMIM]	[PF6]	298.15	6.01	1	1	4	2	0	0	0	0	0	0	0	0	0	0	0	0	0	0	0	1	0	0	0	0	1	0	0	0	0	0	0	0	1	0	0	0	6	0	0	0	0	0	0	0.103
[BMIM][PF6]	[BMIM]	[PF6]	323.15	6.01	1	1	4	2	0	0	0	0	0	0	0	0	0	0	0	0	0	0	0	1	0	0	0	0	1	0	0	0	0	0	0	0	1	0	0	0	6	0	0	0	0	0	0	0.0685
[BMIM][PF6]	[BMIM]	[PF6]	283.15	6	1	1	4	2	0	0	0	0	0	0	0	0	0	0	0	0	0	0	0	1	0	0	0	0	1	0	0	0	0	0	0	0	1	0	0	0	6	0	0	0	0	0	0	0.139
[BMIM][PF6]	[BMIM]	[PF6]	283.15	6	1	1	4	2	0	0	0	0	0	0	0	0	0	0	0	0	0	0	0	1	0	0	0	0	1	0	0	0	0	0	0	0	1	0	0	0	6	0	0	0	0	0	0	0.139
[BMIM][PF6]	[BMIM]	[PF6]	298.15	6	1	1	4	2	0	0	0	0	0	0	0	0	0	0	0	0	0	0	0	1	0	0	0	0	1	0	0	0	0	0	0	0	1	0	0	0	6	0	0	0	0	0	0	0.103
[BMIM][PF6]	[BMIM]	[PF6]	323.15	6	1	1	4	2	0	0	0	0	0	0	0	0	0	0	0	0	0	0	0	1	0	0	0	0	1	0	0	0	0	0	0	0	1	0	0	0	6	0	0	0	0	0	0	0.0689
[BMIM][PF6]	[BMIM]	[PF6]	298.15	5.51	1	1	4	2	0	0	0	0	0	0	0	0	0	0	0	0	0	0	0	1	0	0	0	0	1	0	0	0	0	0	0	0	1	0	0	0	6	0	0	0	0	0	0	0.0951
[BMIM][PF6]	[BMIM]	[PF6]	323.15	5.51	1	1	4	2	0	0	0	0	0	0	0	0	0	0	0	0	0	0	0	1	0	0	0	0	1	0	0	0	0	0	0	0	1	0	0	0	6	0	0	0	0	0	0	0.0626
[BMIM][PF6]	[BMIM]	[PF6]	283.15	5.5	1	1	4	2	0	0	0	0	0	0	0	0	0	0	0	0	0	0	0	1	0	0	0	0	1	0	0	0	0	0	0	0	1	0	0	0	6	0	0	0	0	0	0	0.128
[BMIM][PF6]	[BMIM]	[PF6]	283.15	5.5	1	1	4	2	0	0	0	0	0	0	0	0	0	0	0	0	0	0	0	1	0	0	0	0	1	0	0	0	0	0	0	0	1	0	0	0	6	0	0	0	0	0	0	0.129
[BMIM][PF6]	[BMIM]	[PF6]	298.15	5.5	1	1	4	2	0	0	0	0	0	0	0	0	0	0	0	0	0	0	0	1	0	0	0	0	1	0	0	0	0	0	0	0	1	0	0	0	6	0	0	0	0	0	0	0.0958
[BMIM][PF6]	[BMIM]	[PF6]	323.15	5.5	1	1	4	2	0	0	0	0	0	0	0	0	0	0	0	0	0	0	0	1	0	0	0	0	1	0	0	0	0	0	0	0	1	0	0	0	6	0	0	0	0	0	0	0.0643
[BMIM][PF6]	[BMIM]	[PF6]	298.15	5.01	1	1	4	2	0	0	0	0	0	0	0	0	0	0	0	0	0	0	0	1	0	0	0	0	1	0	0	0	0	0	0	0	1	0	0	0	6	0	0	0	0	0	0	0.0874
[BMIM][PF6]	[BMIM]	[PF6]	323.15	5.01	1	1	4	2	0	0	0	0	0	0	0	0	0	0	0	0	0	0	0	1	0	0	0	0	1	0	0	0	0	0	0	0	1	0	0	0	6	0	0	0	0	0	0	0.0577
[BMIM][PF6]	[BMIM]	[PF6]	283.15	5	1	1	4	2	0	0	0	0	0	0	0	0	0	0	0	0	0	0	0	1	0	0	0	0	1	0	0	0	0	0	0	0	1	0	0	0	6	0	0	0	0	0	0	0.118
[BMIM][PF6]	[BMIM]	[PF6]	298.15	5	1	1	4	2	0	0	0	0	0	0	0	0	0	0	0	0	0	0	0	1	0	0	0	0	1	0	0	0	0	0	0	0	1	0	0	0	6	0	0	0	0	0	0	0.0878
[BMIM][PF6]	[BMIM]	[PF6]	323.15	5	1	1	4	2	0	0	0	0	0	0	0	0	0	0	0	0	0	0	0	1	0	0	0	0	1	0	0	0	0	0	0	0	1	0	0	0	6	0	0	0	0	0	0	0.0583
[BMIM][PF6]	[BMIM]	[PF6]	283.15	4.99	1	1	4	2	0	0	0	0	0	0	0	0	0	0	0	0	0	0	0	1	0	0	0	0	1	0	0	0	0	0	0	0	1	0	0	0	6	0	0	0	0	0	0	0.118
[BMIM][PF6]	[BMIM]	[PF6]	298.15	4.51	1	1	4	2	0	0	0	0	0	0	0	0	0	0	0	0	0	0	0	1	0	0	0	0	1	0	0	0	0	0	0	0	1	0	0	0	6	0	0	0	0	0	0	0.0794
[BMIM][PF6]	[BMIM]	[PF6]	323.15	4.51	1	1	4	2	0	0	0	0	0	0	0	0	0	0	0	0	0	0	0	1	0	0	0	0	1	0	0	0	0	0	0	0	1	0	0	0	6	0	0	0	0	0	0	0.0522
[BMIM][PF6]	[BMIM]	[PF6]	283.15	4.5	1	1	4	2	0	0	0	0	0	0	0	0	0	0	0	0	0	0	0	1	0	0	0	0	1	0	0	0	0	0	0	0	1	0	0	0	6	0	0	0	0	0	0	0.107
[BMIM][PF6]	[BMIM]	[PF6]	283.15	4.5	1	1	4	2	0	0	0	0	0	0	0	0	0	0	0	0	0	0	0	1	0	0	0	0	1	0	0	0	0	0	0	0	1	0	0	0	6	0	0	0	0	0	0	0.108
[BMIM][PF6]	[BMIM]	[PF6]	298.15	4.5	1	1	4	2	0	0	0	0	0	0	0	0	0	0	0	0	0	0	0	1	0	0	0	0	1	0	0	0	0	0	0	0	1	0	0	0	6	0	0	0	0	0	0	0.0794
[BMIM][PF6]	[BMIM]	[PF6]	323.15	4.5	1	1	4	2	0	0	0	0	0	0	0	0	0	0	0	0	0	0	0	1	0	0	0	0	1	0	0	0	0	0	0	0	1	0	0	0	6	0	0	0	0	0	0	0.0528
[BMIM][PF6]	[BMIM]	[PF6]	298.15	4.01	1	1	4	2	0	0	0	0	0	0	0	0	0	0	0	0	0	0	0	1	0	0	0	0	1	0	0	0	0	0	0	0	1	0	0	0	6	0	0	0	0	0	0	0.0711
[BMIM][PF6]	[BMIM]	[PF6]	323.15	4.01	1	1	4	2	0	0	0	0	0	0	0	0	0	0	0	0	0	0	0	1	0	0	0	0	1	0	0	0	0	0	0	0	1	0	0	0	6	0	0	0	0	0	0	0.0456
[BMIM][PF6]	[BMIM]	[PF6]	283.15	4	1	1	4	2	0	0	0	0	0	0	0	0	0	0	0	0	0	0	0	1	0	0	0	0	1	0	0	0	0	0	0	0	1	0	0	0	6	0	0	0	0	0	0	0.0962
[BMIM][PF6]	[BMIM]	[PF6]	283.15	4	1	1	4	2	0	0	0	0	0	0	0	0	0	0	0	0	0	0	0	1	0	0	0	0	1	0	0	0	0	0	0	0	1	0	0	0	6	0	0	0	0	0	0	0.0971
[BMIM][PF6]	[BMIM]	[PF6]	298.15	4	1	1	4	2	0	0	0	0	0	0	0	0	0	0	0	0	0	0	0	1	0	0	0	0	1	0	0	0	0	0	0	0	1	0	0	0	6	0	0	0	0	0	0	0.0703
[BMIM][PF6]	[BMIM]	[PF6]	323.15	4	1	1	4	2	0	0	0	0	0	0	0	0	0	0	0	0	0	0	0	1	0	0	0	0	1	0	0	0	0	0	0	0	1	0	0	0	6	0	0	0	0	0	0	0.0468
[BMIM][PF6]	[BMIM]	[PF6]	298.15	3.51	1	1	4	2	0	0	0	0	0	0	0	0	0	0	0	0	0	0	0	1	0	0	0	0	1	0	0	0	0	0	0	0	1	0	0	0	6	0	0	0	0	0	0	0.0628
[BMIM][PF6]	[BMIM]	[PF6]	323.15	3.51	1	1	4	2	0	0	0	0	0	0	0	0	0	0	0	0	0	0	0	1	0	0	0	0	1	0	0	0	0	0	0	0	1	0	0	0	6	0	0	0	0	0	0	0.0401
[BMIM][PF6]	[BMIM]	[PF6]	283.15	3.5	1	1	4	2	0	0	0	0	0	0	0	0	0	0	0	0	0	0	0	1	0	0	0	0	1	0	0	0	0	0	0	0	1	0	0	0	6	0	0	0	0	0	0	0.0851
[BMIM][PF6]	[BMIM]	[PF6]	283.15	3.5	1	1	4	2	0	0	0	0	0	0	0	0	0	0	0	0	0	0	0	1	0	0	0	0	1	0	0	0	0	0	0	0	1	0	0	0	6	0	0	0	0	0	0	0.086
[BMIM][PF6]	[BMIM]	[PF6]	298.15	3.5	1	1	4	2	0	0	0	0	0	0	0	0	0	0	0	0	0	0	0	1	0	0	0	0	1	0	0	0	0	0	0	0	1	0	0	0	6	0	0	0	0	0	0	0.0619
[BMIM][PF6]	[BMIM]	[PF6]	323.15	3.5	1	1	4	2	0	0	0	0	0	0	0	0	0	0	0	0	0	0	0	1	0	0	0	0	1	0	0	0	0	0	0	0	1	0	0	0	6	0	0	0	0	0	0	0.0412
[BMIM][PF6]	[BMIM]	[PF6]	298.15	3.01	1	1	4	2	0	0	0	0	0	0	0	0	0	0	0	0	0	0	0	1	0	0	0	0	1	0	0	0	0	0	0	0	1	0	0	0	6	0	0	0	0	0	0	0.0545
[BMIM][PF6]	[BMIM]	[PF6]	323.15	3.01	1	1	4	2	0	0	0	0	0	0	0	0	0	0	0	0	0	0	0	1	0	0	0	0	1	0	0	0	0	0	0	0	1	0	0	0	6	0	0	0	0	0	0	0.034
[BMIM][PF6]	[BMIM]	[PF6]	283.15	3	1	1	4	2	0	0	0	0	0	0	0	0	0	0	0	0	0	0	0	1	0	0	0	0	1	0	0	0	0	0	0	0	1	0	0	0	6	0	0	0	0	0	0	0.0737
[BMIM][PF6]	[BMIM]	[PF6]	283.15	3	1	1	4	2	0	0	0	0	0	0	0	0	0	0	0	0	0	0	0	1	0	0	0	0	1	0	0	0	0	0	0	0	1	0	0	0	6	0	0	0	0	0	0	0.0747
[BMIM][PF6]	[BMIM]	[PF6]	298.15	3	1	1	4	2	0	0	0	0	0	0	0	0	0	0	0	0	0	0	0	1	0	0	0	0	1	0	0	0	0	0	0	0	1	0	0	0	6	0	0	0	0	0	0	0.0534
[BMIM][PF6]	[BMIM]	[PF6]	323.15	3	1	1	4	2	0	0	0	0	0	0	0	0	0	0	0	0	0	0	0	1	0	0	0	0	1	0	0	0	0	0	0	0	1	0	0	0	6	0	0	0	0	0	0	0.0352
[BMIM][PF6]	[BMIM]	[PF6]	298.15	2.51	1	1	4	2	0	0	0	0	0	0	0	0	0	0	0	0	0	0	0	1	0	0	0	0	1	0	0	0	0	0	0	0	1	0	0	0	6	0	0	0	0	0	0	0.0458
[BMIM][PF6]	[BMIM]	[PF6]	323.15	2.51	1	1	4	2	0	0	0	0	0	0	0	0	0	0	0	0	0	0	0	1	0	0	0	0	1	0	0	0	0	0	0	0	1	0	0	0	6	0	0	0	0	0	0	0.0293
[BMIM][PF6]	[BMIM]	[PF6]	283.15	2.5	1	1	4	2	0	0	0	0	0	0	0	0	0	0	0	0	0	0	0	1	0	0	0	0	1	0	0	0	0	0	0	0	1	0	0	0	6	0	0	0	0	0	0	0.0618
[BMIM][PF6]	[BMIM]	[PF6]	283.15	2.5	1	1	4	2	0	0	0	0	0	0	0	0	0	0	0	0	0	0	0	1	0	0	0	0	1	0	0	0	0	0	0	0	1	0	0	0	6	0	0	0	0	0	0	0.0631
[BMIM][PF6]	[BMIM]	[PF6]	298.15	2.5	1	1	4	2	0	0	0	0	0	0	0	0	0	0	0	0	0	0	0	1	0	0	0	0	1	0	0	0	0	0	0	0	1	0	0	0	6	0	0	0	0	0	0	0.0446
[BMIM][PF6]	[BMIM]	[PF6]	323.15	2.5	1	1	4	2	0	0	0	0	0	0	0	0	0	0	0	0	0	0	0	1	0	0	0	0	1	0	0	0	0	0	0	0	1	0	0	0	6	0	0	0	0	0	0	0.0299
[BMIM][PF6]	[BMIM]	[PF6]	298.15	2.01	1	1	4	2	0	0	0	0	0	0	0	0	0	0	0	0	0	0	0	1	0	0	0	0	1	0	0	0	0	0	0	0	1	0	0	0	6	0	0	0	0	0	0	0.0369
[BMIM][PF6]	[BMIM]	[PF6]	323.15	2.01	1	1	4	2	0	0	0	0	0	0	0	0	0	0	0	0	0	0	0	1	0	0	0	0	1	0	0	0	0	0	0	0	1	0	0	0	6	0	0	0	0	0	0	0.0241
[BMIM][PF6]	[BMIM]	[PF6]	283.15	2	1	1	4	2	0	0	0	0	0	0	0	0	0	0	0	0	0	0	0	1	0	0	0	0	1	0	0	0	0	0	0	0	1	0	0	0	6	0	0	0	0	0	0	0.0496
[BMIM][PF6]	[BMIM]	[PF6]	298.15	2	1	1	4	2	0	0	0	0	0	0	0	0	0	0	0	0	0	0	0	1	0	0	0	0	1	0	0	0	0	0	0	0	1	0	0	0	6	0	0	0	0	0	0	0.0355
[BMIM][PF6]	[BMIM]	[PF6]	283.15	2	1	1	4	2	0	0	0	0	0	0	0	0	0	0	0	0	0	0	0	1	0	0	0	0	1	0	0	0	0	0	0	0	1	0	0	0	6	0	0	0	0	0	0	0.0512
[BMIM][PF6]	[BMIM]	[PF6]	323.15	2	1	1	4	2	0	0	0	0	0	0	0	0	0	0	0	0	0	0	0	1	0	0	0	0	1	0	0	0	0	0	0	0	1	0	0	0	6	0	0	0	0	0	0	0.0222
[BMIM][PF6]	[BMIM]	[PF6]	298.15	1.51	1	1	4	2	0	0	0	0	0	0	0	0	0	0	0	0	0	0	0	1	0	0	0	0	1	0	0	0	0	0	0	0	1	0	0	0	6	0	0	0	0	0	0	0.028
[BMIM][PF6]	[BMIM]	[PF6]	323.15	1.51	1	1	4	2	0	0	0	0	0	0	0	0	0	0	0	0	0	0	0	1	0	0	0	0	1	0	0	0	0	0	0	0	1	0	0	0	6	0	0	0	0	0	0	0.0175
[BMIM][PF6]	[BMIM]	[PF6]	283.15	1.5	1	1	4	2	0	0	0	0	0	0	0	0	0	0	0	0	0	0	0	1	0	0	0	0	1	0	0	0	0	0	0	0	1	0	0	0	6	0	0	0	0	0	0	0.0371
[BMIM][PF6]	[BMIM]	[PF6]	298.15	1.5	1	1	4	2	0	0	0	0	0	0	0	0	0	0	0	0	0	0	0	1	0	0	0	0	1	0	0	0	0	0	0	0	1	0	0	0	6	0	0	0	0	0	0	0.0265
[BMIM][PF6]	[BMIM]	[PF6]	283.15	1.5	1	1	4	2	0	0	0	0	0	0	0	0	0	0	0	0	0	0	0	1	0	0	0	0	1	0	0	0	0	0	0	0	1	0	0	0	6	0	0	0	0	0	0	0.0393
[BMIM][PF6]	[BMIM]	[PF6]	323.15	1.5	1	1	4	2	0	0	0	0	0	0	0	0	0	0	0	0	0	0	0	1	0	0	0	0	1	0	0	0	0	0	0	0	1	0	0	0	6	0	0	0	0	0	0	0.0173
[BMIM][PF6]	[BMIM]	[PF6]	298.15	1.01	1	1	4	2	0	0	0	0	0	0	0	0	0	0	0	0	0	0	0	1	0	0	0	0	1	0	0	0	0	0	0	0	1	0	0	0	6	0	0	0	0	0	0	0.0189
[BMIM][PF6]	[BMIM]	[PF6]	298.15	1	1	1	4	2	0	0	0	0	0	0	0	0	0	0	0	0	0	0	0	1	0	0	0	0	1	0	0	0	0	0	0	0	1	0	0	0	6	0	0	0	0	0	0	0.0168
[BMIM][PF6]	[BMIM]	[PF6]	323.15	1	1	1	4	2	0	0	0	0	0	0	0	0	0	0	0	0	0	0	0	1	0	0	0	0	1	0	0	0	0	0	0	0	1	0	0	0	6	0	0	0	0	0	0	0.0101
[BMIM][PF6]	[BMIM]	[PF6]	283.15	1	1	1	4	2	0	0	0	0	0	0	0	0	0	0	0	0	0	0	0	1	0	0	0	0	1	0	0	0	0	0	0	0	1	0	0	0	6	0	0	0	0	0	0	0.0244
[BMIM][PF6]	[BMIM]	[PF6]	323.15	1	1	1	4	2	0	0	0	0	0	0	0	0	0	0	0	0	0	0	0	1	0	0	0	0	1	0	0	0	0	0	0	0	1	0	0	0	6	0	0	0	0	0	0	0.0112
[BMIM][PF6]	[BMIM]	[PF6]	283.15	0.999	1	1	4	2	0	0	0	0	0	0	0	0	0	0	0	0	0	0	0	1	0	0	0	0	1	0	0	0	0	0	0	0	1	0	0	0	6	0	0	0	0	0	0	0.0267
[BMIM][PF6]	[BMIM]	[PF6]	323.15	0.505	1	1	4	2	0	0	0	0	0	0	0	0	0	0	0	0	0	0	0	1	0	0	0	0	1	0	0	0	0	0	0	0	1	0	0	0	6	0	0	0	0	0	0	0.00545
[BMIM][PF6]	[BMIM]	[PF6]	298.15	0.505	1	1	4	2	0	0	0	0	0	0	0	0	0	0	0	0	0	0	0	1	0	0	0	0	1	0	0	0	0	0	0	0	1	0	0	0	6	0	0	0	0	0	0	0.00982
[BMIM][PF6]	[BMIM]	[PF6]	298.15	0.503	1	1	4	2	0	0	0	0	0	0	0	0	0	0	0	0	0	0	0	1	0	0	0	0	1	0	0	0	0	0	0	0	1	0	0	0	6	0	0	0	0	0	0	0.00756
[BMIM][PF6]	[BMIM]	[PF6]	323.15	0.499	1	1	4	2	0	0	0	0	0	0	0	0	0	0	0	0	0	0	0	1	0	0	0	0	1	0	0	0	0	0	0	0	1	0	0	0	6	0	0	0	0	0	0	0.00409
[BMIM][PF6]	[BMIM]	[PF6]	283.15	0.499	1	1	4	2	0	0	0	0	0	0	0	0	0	0	0	0	0	0	0	1	0	0	0	0	1	0	0	0	0	0	0	0	1	0	0	0	6	0	0	0	0	0	0	0.0116
[BMIM][PF6]	[BMIM]	[PF6]	283.15	0.499	1	1	4	2	0	0	0	0	0	0	0	0	0	0	0	0	0	0	0	1	0	0	0	0	1	0	0	0	0	0	0	0	1	0	0	0	6	0	0	0	0	0	0	0.0139
[BMIM][PF6]	[BMIM]	[PF6]	323.15	0.0378	1	1	4	2	0	0	0	0	0	0	0	0	0	0	0	0	0	0	0	1	0	0	0	0	1	0	0	0	0	0	0	0	1	0	0	0	6	0	0	0	0	0	0	0.00036
[BMIM][PF6]	[BMIM]	[PF6]	298.15	0.0333	1	1	4	2	0	0	0	0	0	0	0	0	0	0	0	0	0	0	0	1	0	0	0	0	1	0	0	0	0	0	0	0	1	0	0	0	6	0	0	0	0	0	0	0.000701
[BMIM][PF6]	[BMIM]	[PF6]	283.15	0.0317	1	1	4	2	0	0	0	0	0	0	0	0	0	0	0	0	0	0	0	1	0	0	0	0	1	0	0	0	0	0	0	0	1	0	0	0	6	0	0	0	0	0	0	0.00179
[BMIM][Tf2N]	[BMIM]	[Tf2N]	283.15	13	1	1	4	2	0	0	0	0	0	0	0	0	0	0	0	0	0	0	0	1	0	0	0	0	0	0	0	0	1	0	0	0	0	0	0	0	2	0	0	1	0	0	0	0.366
[BMIM][Tf2N]	[BMIM]	[Tf2N]	283.15	13	1	1	4	2	0	0	0	0	0	0	0	0	0	0	0	0	0	0	0	1	0	0	0	0	0	0	0	0	1	0	0	0	0	0	0	0	2	0	0	1	0	0	0	0.366
[BMIM][Tf2N]	[BMIM]	[Tf2N]	283.15	13	1	1	4	2	0	0	0	0	0	0	0	0	0	0	0	0	0	0	0	1	0	0	0	0	0	0	0	0	1	0	0	0	0	0	0	0	2	0	0	1	0	0	0	0.372
[BMIM][Tf2N]	[BMIM]	[Tf2N]	283.15	13	1	1	4	2	0	0	0	0	0	0	0	0	0	0	0	0	0	0	0	1	0	0	0	0	0	0	0	0	1	0	0	0	0	0	0	0	2	0	0	1	0	0	0	0.372
[BMIM][Tf2N]	[BMIM]	[Tf2N]	298.15	13	1	1	4	2	0	0	0	0	0	0	0	0	0	0	0	0	0	0	0	1	0	0	0	0	0	0	0	0	1	0	0	0	0	0	0	0	2	0	0	1	0	0	0	0.292
[BMIM][Tf2N]	[BMIM]	[Tf2N]	298.15	13	1	1	4	2	0	0	0	0	0	0	0	0	0	0	0	0	0	0	0	1	0	0	0	0	0	0	0	0	1	0	0	0	0	0	0	0	2	0	0	1	0	0	0	0.292
[BMIM][Tf2N]	[BMIM]	[Tf2N]	298.15	13	1	1	4	2	0	0	0	0	0	0	0	0	0	0	0	0	0	0	0	1	0	0	0	0	0	0	0	0	1	0	0	0	0	0	0	0	2	0	0	1	0	0	0	0.296
[BMIM][Tf2N]	[BMIM]	[Tf2N]	298.15	13	1	1	4	2	0	0	0	0	0	0	0	0	0	0	0	0	0	0	0	1	0	0	0	0	0	0	0	0	1	0	0	0	0	0	0	0	2	0	0	1	0	0	0	0.296
[BMIM][Tf2N]	[BMIM]	[Tf2N]	323.15	13	1	1	4	2	0	0	0	0	0	0	0	0	0	0	0	0	0	0	0	1	0	0	0	0	0	0	0	0	1	0	0	0	0	0	0	0	2	0	0	1	0	0	0	0.208
[BMIM][Tf2N]	[BMIM]	[Tf2N]	323.15	13	1	1	4	2	0	0	0	0	0	0	0	0	0	0	0	0	0	0	0	1	0	0	0	0	0	0	0	0	1	0	0	0	0	0	0	0	2	0	0	1	0	0	0	0.208
[BMIM][Tf2N]	[BMIM]	[Tf2N]	283.15	12	1	1	4	2	0	0	0	0	0	0	0	0	0	0	0	0	0	0	0	1	0	0	0	0	0	0	0	0	1	0	0	0	0	0	0	0	2	0	0	1	0	0	0	0.347
[BMIM][Tf2N]	[BMIM]	[Tf2N]	283.15	12	1	1	4	2	0	0	0	0	0	0	0	0	0	0	0	0	0	0	0	1	0	0	0	0	0	0	0	0	1	0	0	0	0	0	0	0	2	0	0	1	0	0	0	0.352
[BMIM][Tf2N]	[BMIM]	[Tf2N]	298.15	12	1	1	4	2	0	0	0	0	0	0	0	0	0	0	0	0	0	0	0	1	0	0	0	0	0	0	0	0	1	0	0	0	0	0	0	0	2	0	0	1	0	0	0	0.276
[BMIM][Tf2N]	[BMIM]	[Tf2N]	298.15	12	1	1	4	2	0	0	0	0	0	0	0	0	0	0	0	0	0	0	0	1	0	0	0	0	0	0	0	0	1	0	0	0	0	0	0	0	2	0	0	1	0	0	0	0.279
[BMIM][Tf2N]	[BMIM]	[Tf2N]	323.15	12	1	1	4	2	0	0	0	0	0	0	0	0	0	0	0	0	0	0	0	1	0	0	0	0	0	0	0	0	1	0	0	0	0	0	0	0	2	0	0	1	0	0	0	0.196
[BMIM][Tf2N]	[BMIM]	[Tf2N]	283.15	11	1	1	4	2	0	0	0	0	0	0	0	0	0	0	0	0	0	0	0	1	0	0	0	0	0	0	0	0	1	0	0	0	0	0	0	0	2	0	0	1	0	0	0	0.327
[BMIM][Tf2N]	[BMIM]	[Tf2N]	283.15	11	1	1	4	2	0	0	0	0	0	0	0	0	0	0	0	0	0	0	0	1	0	0	0	0	0	0	0	0	1	0	0	0	0	0	0	0	2	0	0	1	0	0	0	0.327
[BMIM][Tf2N]	[BMIM]	[Tf2N]	283.15	11	1	1	4	2	0	0	0	0	0	0	0	0	0	0	0	0	0	0	0	1	0	0	0	0	0	0	0	0	1	0	0	0	0	0	0	0	2	0	0	1	0	0	0	0.331
[BMIM][Tf2N]	[BMIM]	[Tf2N]	283.15	11	1	1	4	2	0	0	0	0	0	0	0	0	0	0	0	0	0	0	0	1	0	0	0	0	0	0	0	0	1	0	0	0	0	0	0	0	2	0	0	1	0	0	0	0.332
[BMIM][Tf2N]	[BMIM]	[Tf2N]	298.15	11	1	1	4	2	0	0	0	0	0	0	0	0	0	0	0	0	0	0	0	1	0	0	0	0	0	0	0	0	1	0	0	0	0	0	0	0	2	0	0	1	0	0	0	0.259
[BMIM][Tf2N]	[BMIM]	[Tf2N]	298.15	11	1	1	4	2	0	0	0	0	0	0	0	0	0	0	0	0	0	0	0	1	0	0	0	0	0	0	0	0	1	0	0	0	0	0	0	0	2	0	0	1	0	0	0	0.26
[BMIM][Tf2N]	[BMIM]	[Tf2N]	298.15	11	1	1	4	2	0	0	0	0	0	0	0	0	0	0	0	0	0	0	0	1	0	0	0	0	0	0	0	0	1	0	0	0	0	0	0	0	2	0	0	1	0	0	0	0.262
[BMIM][Tf2N]	[BMIM]	[Tf2N]	298.15	11	1	1	4	2	0	0	0	0	0	0	0	0	0	0	0	0	0	0	0	1	0	0	0	0	0	0	0	0	1	0	0	0	0	0	0	0	2	0	0	1	0	0	0	0.262
[BMIM][Tf2N]	[BMIM]	[Tf2N]	323.15	11	1	1	4	2	0	0	0	0	0	0	0	0	0	0	0	0	0	0	0	1	0	0	0	0	0	0	0	0	1	0	0	0	0	0	0	0	2	0	0	1	0	0	0	0.183
[BMIM][Tf2N]	[BMIM]	[Tf2N]	323.15	11	1	1	4	2	0	0	0	0	0	0	0	0	0	0	0	0	0	0	0	1	0	0	0	0	0	0	0	0	1	0	0	0	0	0	0	0	2	0	0	1	0	0	0	0.183
[BMIM][Tf2N]	[BMIM]	[Tf2N]	283.15	10	1	1	4	2	0	0	0	0	0	0	0	0	0	0	0	0	0	0	0	1	0	0	0	0	0	0	0	0	1	0	0	0	0	0	0	0	2	0	0	1	0	0	0	0.305
[BMIM][Tf2N]	[BMIM]	[Tf2N]	283.15	10	1	1	4	2	0	0	0	0	0	0	0	0	0	0	0	0	0	0	0	1	0	0	0	0	0	0	0	0	1	0	0	0	0	0	0	0	2	0	0	1	0	0	0	0.309
[BMIM][Tf2N]	[BMIM]	[Tf2N]	298.15	10	1	1	4	2	0	0	0	0	0	0	0	0	0	0	0	0	0	0	0	1	0	0	0	0	0	0	0	0	1	0	0	0	0	0	0	0	2	0	0	1	0	0	0	0.242
[BMIM][Tf2N]	[BMIM]	[Tf2N]	298.15	10	1	1	4	2	0	0	0	0	0	0	0	0	0	0	0	0	0	0	0	1	0	0	0	0	0	0	0	0	1	0	0	0	0	0	0	0	2	0	0	1	0	0	0	0.244
[BMIM][Tf2N]	[BMIM]	[Tf2N]	323.15	10	1	1	4	2	0	0	0	0	0	0	0	0	0	0	0	0	0	0	0	1	0	0	0	0	0	0	0	0	1	0	0	0	0	0	0	0	2	0	0	1	0	0	0	0.169
[BMIM][Tf2N]	[BMIM]	[Tf2N]	283.15	8.5	1	1	4	2	0	0	0	0	0	0	0	0	0	0	0	0	0	0	0	1	0	0	0	0	0	0	0	0	1	0	0	0	0	0	0	0	2	0	0	1	0	0	0	0.27
[BMIM][Tf2N]	[BMIM]	[Tf2N]	283.15	8.5	1	1	4	2	0	0	0	0	0	0	0	0	0	0	0	0	0	0	0	1	0	0	0	0	0	0	0	0	1	0	0	0	0	0	0	0	2	0	0	1	0	0	0	0.274
[BMIM][Tf2N]	[BMIM]	[Tf2N]	298.15	8.5	1	1	4	2	0	0	0	0	0	0	0	0	0	0	0	0	0	0	0	1	0	0	0	0	0	0	0	0	1	0	0	0	0	0	0	0	2	0	0	1	0	0	0	0.214
[BMIM][Tf2N]	[BMIM]	[Tf2N]	298.15	8.5	1	1	4	2	0	0	0	0	0	0	0	0	0	0	0	0	0	0	0	1	0	0	0	0	0	0	0	0	1	0	0	0	0	0	0	0	2	0	0	1	0	0	0	0.214
[BMIM][Tf2N]	[BMIM]	[Tf2N]	323.15	8.5	1	1	4	2	0	0	0	0	0	0	0	0	0	0	0	0	0	0	0	1	0	0	0	0	0	0	0	0	1	0	0	0	0	0	0	0	2	0	0	1	0	0	0	0.149
[BMIM][Tf2N]	[BMIM]	[Tf2N]	283.15	7	1	1	4	2	0	0	0	0	0	0	0	0	0	0	0	0	0	0	0	1	0	0	0	0	0	0	0	0	1	0	0	0	0	0	0	0	2	0	0	1	0	0	0	0.232
[BMIM][Tf2N]	[BMIM]	[Tf2N]	283.15	7	1	1	4	2	0	0	0	0	0	0	0	0	0	0	0	0	0	0	0	1	0	0	0	0	0	0	0	0	1	0	0	0	0	0	0	0	2	0	0	1	0	0	0	0.235
[BMIM][Tf2N]	[BMIM]	[Tf2N]	298.15	7	1	1	4	2	0	0	0	0	0	0	0	0	0	0	0	0	0	0	0	1	0	0	0	0	0	0	0	0	1	0	0	0	0	0	0	0	2	0	0	1	0	0	0	0.182
[BMIM][Tf2N]	[BMIM]	[Tf2N]	298.15	7	1	1	4	2	0	0	0	0	0	0	0	0	0	0	0	0	0	0	0	1	0	0	0	0	0	0	0	0	1	0	0	0	0	0	0	0	2	0	0	1	0	0	0	0.183
[BMIM][Tf2N]	[BMIM]	[Tf2N]	323.15	7	1	1	4	2	0	0	0	0	0	0	0	0	0	0	0	0	0	0	0	1	0	0	0	0	0	0	0	0	1	0	0	0	0	0	0	0	2	0	0	1	0	0	0	0.128
[BMIM][Tf2N]	[BMIM]	[Tf2N]	283.15	6	1	1	4	2	0	0	0	0	0	0	0	0	0	0	0	0	0	0	0	1	0	0	0	0	0	0	0	0	1	0	0	0	0	0	0	0	2	0	0	1	0	0	0	0.208
[BMIM][Tf2N]	[BMIM]	[Tf2N]	283.15	6	1	1	4	2	0	0	0	0	0	0	0	0	0	0	0	0	0	0	0	1	0	0	0	0	0	0	0	0	1	0	0	0	0	0	0	0	2	0	0	1	0	0	0	0.21
[BMIM][Tf2N]	[BMIM]	[Tf2N]	298.15	6	1	1	4	2	0	0	0	0	0	0	0	0	0	0	0	0	0	0	0	1	0	0	0	0	0	0	0	0	1	0	0	0	0	0	0	0	2	0	0	1	0	0	0	0.159
[BMIM][Tf2N]	[BMIM]	[Tf2N]	298.15	6	1	1	4	2	0	0	0	0	0	0	0	0	0	0	0	0	0	0	0	1	0	0	0	0	0	0	0	0	1	0	0	0	0	0	0	0	2	0	0	1	0	0	0	0.161
[BMIM][Tf2N]	[BMIM]	[Tf2N]	323.15	6	1	1	4	2	0	0	0	0	0	0	0	0	0	0	0	0	0	0	0	1	0	0	0	0	0	0	0	0	1	0	0	0	0	0	0	0	2	0	0	1	0	0	0	0.11
[BMIM][Tf2N]	[BMIM]	[Tf2N]	283.15	5.51	1	1	4	2	0	0	0	0	0	0	0	0	0	0	0	0	0	0	0	1	0	0	0	0	0	0	0	0	1	0	0	0	0	0	0	0	2	0	0	1	0	0	0	0.189
[BMIM][Tf2N]	[BMIM]	[Tf2N]	283.15	5.5	1	1	4	2	0	0	0	0	0	0	0	0	0	0	0	0	0	0	0	1	0	0	0	0	0	0	0	0	1	0	0	0	0	0	0	0	2	0	0	1	0	0	0	0.193
[BMIM][Tf2N]	[BMIM]	[Tf2N]	298.15	5.5	1	1	4	2	0	0	0	0	0	0	0	0	0	0	0	0	0	0	0	1	0	0	0	0	0	0	0	0	1	0	0	0	0	0	0	0	2	0	0	1	0	0	0	0.149
[BMIM][Tf2N]	[BMIM]	[Tf2N]	298.15	5.5	1	1	4	2	0	0	0	0	0	0	0	0	0	0	0	0	0	0	0	1	0	0	0	0	0	0	0	0	1	0	0	0	0	0	0	0	2	0	0	1	0	0	0	0.149
[BMIM][Tf2N]	[BMIM]	[Tf2N]	323.15	5.5	1	1	4	2	0	0	0	0	0	0	0	0	0	0	0	0	0	0	0	1	0	0	0	0	0	0	0	0	1	0	0	0	0	0	0	0	2	0	0	1	0	0	0	0.104
[BMIM][Tf2N]	[BMIM]	[Tf2N]	283.15	4	1	1	4	2	0	0	0	0	0	0	0	0	0	0	0	0	0	0	0	1	0	0	0	0	0	0	0	0	1	0	0	0	0	0	0	0	2	0	0	1	0	0	0	0.142
[BMIM][Tf2N]	[BMIM]	[Tf2N]	283.15	4	1	1	4	2	0	0	0	0	0	0	0	0	0	0	0	0	0	0	0	1	0	0	0	0	0	0	0	0	1	0	0	0	0	0	0	0	2	0	0	1	0	0	0	0.146
[BMIM][Tf2N]	[BMIM]	[Tf2N]	298.15	4	1	1	4	2	0	0	0	0	0	0	0	0	0	0	0	0	0	0	0	1	0	0	0	0	0	0	0	0	1	0	0	0	0	0	0	0	2	0	0	1	0	0	0	0.111
[BMIM][Tf2N]	[BMIM]	[Tf2N]	298.15	4	1	1	4	2	0	0	0	0	0	0	0	0	0	0	0	0	0	0	0	1	0	0	0	0	0	0	0	0	1	0	0	0	0	0	0	0	2	0	0	1	0	0	0	0.113
[BMIM][Tf2N]	[BMIM]	[Tf2N]	323.15	4	1	1	4	2	0	0	0	0	0	0	0	0	0	0	0	0	0	0	0	1	0	0	0	0	0	0	0	0	1	0	0	0	0	0	0	0	2	0	0	1	0	0	0	0.0781
[BMIM][Tf2N]	[BMIM]	[Tf2N]	283.15	2.5	1	1	4	2	0	0	0	0	0	0	0	0	0	0	0	0	0	0	0	1	0	0	0	0	0	0	0	0	1	0	0	0	0	0	0	0	2	0	0	1	0	0	0	0.0901
[BMIM][Tf2N]	[BMIM]	[Tf2N]	283.15	2.5	1	1	4	2	0	0	0	0	0	0	0	0	0	0	0	0	0	0	0	1	0	0	0	0	0	0	0	0	1	0	0	0	0	0	0	0	2	0	0	1	0	0	0	0.0941
[BMIM][Tf2N]	[BMIM]	[Tf2N]	298.15	2.5	1	1	4	2	0	0	0	0	0	0	0	0	0	0	0	0	0	0	0	1	0	0	0	0	0	0	0	0	1	0	0	0	0	0	0	0	2	0	0	1	0	0	0	0.072
[BMIM][Tf2N]	[BMIM]	[Tf2N]	298.15	2.5	1	1	4	2	0	0	0	0	0	0	0	0	0	0	0	0	0	0	0	1	0	0	0	0	0	0	0	0	1	0	0	0	0	0	0	0	2	0	0	1	0	0	0	0.0734
[BMIM][Tf2N]	[BMIM]	[Tf2N]	323.15	2.5	1	1	4	2	0	0	0	0	0	0	0	0	0	0	0	0	0	0	0	1	0	0	0	0	0	0	0	0	1	0	0	0	0	0	0	0	2	0	0	1	0	0	0	0.0483
[BMIM][Tf2N]	[BMIM]	[Tf2N]	283.15	2	1	1	4	2	0	0	0	0	0	0	0	0	0	0	0	0	0	0	0	1	0	0	0	0	0	0	0	0	1	0	0	0	0	0	0	0	2	0	0	1	0	0	0	0.0818
[BMIM][Tf2N]	[BMIM]	[Tf2N]	283.15	2	1	1	4	2	0	0	0	0	0	0	0	0	0	0	0	0	0	0	0	1	0	0	0	0	0	0	0	0	1	0	0	0	0	0	0	0	2	0	0	1	0	0	0	0.0823
[BMIM][Tf2N]	[BMIM]	[Tf2N]	298.15	2	1	1	4	2	0	0	0	0	0	0	0	0	0	0	0	0	0	0	0	1	0	0	0	0	0	0	0	0	1	0	0	0	0	0	0	0	2	0	0	1	0	0	0	0.0601
[BMIM][Tf2N]	[BMIM]	[Tf2N]	298.15	2	1	1	4	2	0	0	0	0	0	0	0	0	0	0	0	0	0	0	0	1	0	0	0	0	0	0	0	0	1	0	0	0	0	0	0	0	2	0	0	1	0	0	0	0.0602
[BMIM][Tf2N]	[BMIM]	[Tf2N]	323.15	2	1	1	4	2	0	0	0	0	0	0	0	0	0	0	0	0	0	0	0	1	0	0	0	0	0	0	0	0	1	0	0	0	0	0	0	0	2	0	0	1	0	0	0	0.0378
[BMIM][Tf2N]	[BMIM]	[Tf2N]	283.15	1	1	1	4	2	0	0	0	0	0	0	0	0	0	0	0	0	0	0	0	1	0	0	0	0	0	0	0	0	1	0	0	0	0	0	0	0	2	0	0	1	0	0	0	0.0373
[BMIM][Tf2N]	[BMIM]	[Tf2N]	283.15	1	1	1	4	2	0	0	0	0	0	0	0	0	0	0	0	0	0	0	0	1	0	0	0	0	0	0	0	0	1	0	0	0	0	0	0	0	2	0	0	1	0	0	0	0.0397
[BMIM][Tf2N]	[BMIM]	[Tf2N]	298.15	0.999	1	1	4	2	0	0	0	0	0	0	0	0	0	0	0	0	0	0	0	1	0	0	0	0	0	0	0	0	1	0	0	0	0	0	0	0	2	0	0	1	0	0	0	0.0299
[BMIM][Tf2N]	[BMIM]	[Tf2N]	298.15	0.999	1	1	4	2	0	0	0	0	0	0	0	0	0	0	0	0	0	0	0	1	0	0	0	0	0	0	0	0	1	0	0	0	0	0	0	0	2	0	0	1	0	0	0	0.0308
[BMIM][Tf2N]	[BMIM]	[Tf2N]	323.15	0.999	1	1	4	2	0	0	0	0	0	0	0	0	0	0	0	0	0	0	0	1	0	0	0	0	0	0	0	0	1	0	0	0	0	0	0	0	2	0	0	1	0	0	0	0.0204
[BMIM][Tf2N]	[BMIM]	[Tf2N]	298.15	0.5	1	1	4	2	0	0	0	0	0	0	0	0	0	0	0	0	0	0	0	1	0	0	0	0	0	0	0	0	1	0	0	0	0	0	0	0	2	0	0	1	0	0	0	0.0149
[BMIM][Tf2N]	[BMIM]	[Tf2N]	283.15	0.499	1	1	4	2	0	0	0	0	0	0	0	0	0	0	0	0	0	0	0	1	0	0	0	0	0	0	0	0	1	0	0	0	0	0	0	0	2	0	0	1	0	0	0	0.0179
[BMIM][Tf2N]	[BMIM]	[Tf2N]	283.15	0.499	1	1	4	2	0	0	0	0	0	0	0	0	0	0	0	0	0	0	0	1	0	0	0	0	0	0	0	0	1	0	0	0	0	0	0	0	2	0	0	1	0	0	0	0.0196
[BMIM][Tf2N]	[BMIM]	[Tf2N]	323.15	0.499	1	1	4	2	0	0	0	0	0	0	0	0	0	0	0	0	0	0	0	1	0	0	0	0	0	0	0	0	1	0	0	0	0	0	0	0	2	0	0	1	0	0	0	0.0101
[BMIM][Tf2N]	[BMIM]	[Tf2N]	298.15	0.498	1	1	4	2	0	0	0	0	0	0	0	0	0	0	0	0	0	0	0	1	0	0	0	0	0	0	0	0	1	0	0	0	0	0	0	0	2	0	0	1	0	0	0	0.0155
[BMIM][Tf2N]	[BMIM]	[Tf2N]	298.15	0.199	1	1	4	2	0	0	0	0	0	0	0	0	0	0	0	0	0	0	0	1	0	0	0	0	0	0	0	0	1	0	0	0	0	0	0	0	2	0	0	1	0	0	0	0.00809
[BMIM][Tf2N]	[BMIM]	[Tf2N]	283.15	0.199	1	1	4	2	0	0	0	0	0	0	0	0	0	0	0	0	0	0	0	1	0	0	0	0	0	0	0	0	1	0	0	0	0	0	0	0	2	0	0	1	0	0	0	0.0135
[BMIM][Tf2N]	[BMIM]	[Tf2N]	323.15	0.198	1	1	4	2	0	0	0	0	0	0	0	0	0	0	0	0	0	0	0	1	0	0	0	0	0	0	0	0	1	0	0	0	0	0	0	0	2	0	0	1	0	0	0	0.00182
[BMIM][Tf2N]	[BMIM]	[Tf2N]	298.15	0.198	1	1	4	2	0	0	0	0	0	0	0	0	0	0	0	0	0	0	0	1	0	0	0	0	0	0	0	0	1	0	0	0	0	0	0	0	2	0	0	1	0	0	0	0.00637
[BMIM][Tf2N]	[BMIM]	[Tf2N]	283.15	0.198	1	1	4	2	0	0	0	0	0	0	0	0	0	0	0	0	0	0	0	1	0	0	0	0	0	0	0	0	1	0	0	0	0	0	0	0	2	0	0	1	0	0	0	0.0113
[BMIM][Tf2N]	[BMIM]	[Tf2N]	298.15	0.102	1	1	4	2	0	0	0	0	0	0	0	0	0	0	0	0	0	0	0	1	0	0	0	0	0	0	0	0	1	0	0	0	0	0	0	0	2	0	0	1	0	0	0	0.00319
[BMIM][Tf2N]	[BMIM]	[Tf2N]	283.15	0.0991	1	1	4	2	0	0	0	0	0	0	0	0	0	0	0	0	0	0	0	1	0	0	0	0	0	0	0	0	1	0	0	0	0	0	0	0	2	0	0	1	0	0	0	0.00348
[BMIM][Tf2N]	[BMIM]	[Tf2N]	298.15	0.0991	1	1	4	2	0	0	0	0	0	0	0	0	0	0	0	0	0	0	0	1	0	0	0	0	0	0	0	0	1	0	0	0	0	0	0	0	2	0	0	1	0	0	0	0.00288
[BMIM][Tf2N]	[BMIM]	[Tf2N]	323.15	0.0987	1	1	4	2	0	0	0	0	0	0	0	0	0	0	0	0	0	0	0	1	0	0	0	0	0	0	0	0	1	0	0	0	0	0	0	0	2	0	0	1	0	0	0	0.00172
[BMIM][Tf2N]	[BMIM]	[Tf2N]	283.15	0.0981	1	1	4	2	0	0	0	0	0	0	0	0	0	0	0	0	0	0	0	1	0	0	0	0	0	0	0	0	1	0	0	0	0	0	0	0	2	0	0	1	0	0	0	0.00435
[BMIM][Tf2N]	[BMIM]	[Tf2N]	298.15	0.075	1	1	4	2	0	0	0	0	0	0	0	0	0	0	0	0	0	0	0	1	0	0	0	0	0	0	0	0	1	0	0	0	0	0	0	0	2	0	0	1	0	0	0	0.00181
[BMIM][Tf2N]	[BMIM]	[Tf2N]	283.15	0.0734	1	1	4	2	0	0	0	0	0	0	0	0	0	0	0	0	0	0	0	1	0	0	0	0	0	0	0	0	1	0	0	0	0	0	0	0	2	0	0	1	0	0	0	0.00378
[BMIM][Tf2N]	[BMIM]	[Tf2N]	323.15	0.0731	1	1	4	2	0	0	0	0	0	0	0	0	0	0	0	0	0	0	0	1	0	0	0	0	0	0	0	0	1	0	0	0	0	0	0	0	2	0	0	1	0	0	0	0.00111
[BMIM][Tf2N]	[BMIM]	[Tf2N]	283.15	0.073	1	1	4	2	0	0	0	0	0	0	0	0	0	0	0	0	0	0	0	1	0	0	0	0	0	0	0	0	1	0	0	0	0	0	0	0	2	0	0	1	0	0	0	0.00281
[BMIM][Tf2N]	[BMIM]	[Tf2N]	298.15	0.073	1	1	4	2	0	0	0	0	0	0	0	0	0	0	0	0	0	0	0	1	0	0	0	0	0	0	0	0	1	0	0	0	0	0	0	0	2	0	0	1	0	0	0	0.00281
[BMIM][Tf2N]	[BMIM]	[Tf2N]	298.15	0.05	1	1	4	2	0	0	0	0	0	0	0	0	0	0	0	0	0	0	0	1	0	0	0	0	0	0	0	0	1	0	0	0	0	0	0	0	2	0	0	1	0	0	0	0.00139
[BMIM][Tf2N]	[BMIM]	[Tf2N]	323.15	0.0482	1	1	4	2	0	0	0	0	0	0	0	0	0	0	0	0	0	0	0	1	0	0	0	0	0	0	0	0	1	0	0	0	0	0	0	0	2	0	0	1	0	0	0	0.000558
[BMIM][Tf2N]	[BMIM]	[Tf2N]	298.15	0.0478	1	1	4	2	0	0	0	0	0	0	0	0	0	0	0	0	0	0	0	1	0	0	0	0	0	0	0	0	1	0	0	0	0	0	0	0	2	0	0	1	0	0	0	0.0012
[BMIM][Tf2N]	[BMIM]	[Tf2N]	283.15	0.0476	1	1	4	2	0	0	0	0	0	0	0	0	0	0	0	0	0	0	0	1	0	0	0	0	0	0	0	0	1	0	0	0	0	0	0	0	2	0	0	1	0	0	0	0.00208
[BMIM][Tf2N]	[BMIM]	[Tf2N]	283.15	0.0466	1	1	4	2	0	0	0	0	0	0	0	0	0	0	0	0	0	0	0	1	0	0	0	0	0	0	0	0	1	0	0	0	0	0	0	0	2	0	0	1	0	0	0	0.00146
[BMIM][Tf2N]	[BMIM]	[Tf2N]	323.15	0.0241	1	1	4	2	0	0	0	0	0	0	0	0	0	0	0	0	0	0	0	1	0	0	0	0	0	0	0	0	1	0	0	0	0	0	0	0	2	0	0	1	0	0	0	6.93e-05
[BMIM][Tf2N]	[BMIM]	[Tf2N]	298.15	0.0235	1	1	4	2	0	0	0	0	0	0	0	0	0	0	0	0	0	0	0	1	0	0	0	0	0	0	0	0	1	0	0	0	0	0	0	0	2	0	0	1	0	0	0	0.00168
[BMIM][Tf2N]	[BMIM]	[Tf2N]	298.15	0.0225	1	1	4	2	0	0	0	0	0	0	0	0	0	0	0	0	0	0	0	1	0	0	0	0	0	0	0	0	1	0	0	0	0	0	0	0	2	0	0	1	0	0	0	0.000341
[BMIM][Tf2N]	[BMIM]	[Tf2N]	323.15	0.0213	1	1	4	2	0	0	0	0	0	0	0	0	0	0	0	0	0	0	0	1	0	0	0	0	0	0	0	0	1	0	0	0	0	0	0	0	2	0	0	1	0	0	0	0.0019
[BMIM][Tf2N]	[BMIM]	[Tf2N]	283.15	0.0208	1	1	4	2	0	0	0	0	0	0	0	0	0	0	0	0	0	0	0	1	0	0	0	0	0	0	0	0	1	0	0	0	0	0	0	0	2	0	0	1	0	0	0	0.000149
[BMIM][Tf2N]	[BMIM]	[Tf2N]	298.15	0.0127	1	1	4	2	0	0	0	0	0	0	0	0	0	0	0	0	0	0	0	1	0	0	0	0	0	0	0	0	1	0	0	0	0	0	0	0	2	0	0	1	0	0	0	0.000105
[BMIM][Tf2N]	[BMIM]	[Tf2N]	283.15	0.0102	1	1	4	2	0	0	0	0	0	0	0	0	0	0	0	0	0	0	0	1	0	0	0	0	0	0	0	0	1	0	0	0	0	0	0	0	2	0	0	1	0	0	0	0.000358
[BMPYR][Tf2N]	[BMPYR]	[Tf2N]	283.15	13	1	1	4	2	0	0	0	0	0	0	0	0	0	0	0	0	0	1	0	0	0	0	0	0	0	0	0	0	1	0	0	0	0	0	0	0	2	0	0	1	0	0	0	0.337
[BMPYR][Tf2N]	[BMPYR]	[Tf2N]	283.15	13	1	1	4	2	0	0	0	0	0	0	0	0	0	0	0	0	0	1	0	0	0	0	0	0	0	0	0	0	1	0	0	0	0	0	0	0	2	0	0	1	0	0	0	0.337
[BMPYR][Tf2N]	[BMPYR]	[Tf2N]	298.15	13	1	1	4	2	0	0	0	0	0	0	0	0	0	0	0	0	0	1	0	0	0	0	0	0	0	0	0	0	1	0	0	0	0	0	0	0	2	0	0	1	0	0	0	0.267
[BMPYR][Tf2N]	[BMPYR]	[Tf2N]	298.15	13	1	1	4	2	0	0	0	0	0	0	0	0	0	0	0	0	0	1	0	0	0	0	0	0	0	0	0	0	1	0	0	0	0	0	0	0	2	0	0	1	0	0	0	0.267
[BMPYR][Tf2N]	[BMPYR]	[Tf2N]	323.15	13	1	1	4	2	0	0	0	0	0	0	0	0	0	0	0	0	0	1	0	0	0	0	0	0	0	0	0	0	1	0	0	0	0	0	0	0	2	0	0	1	0	0	0	0.193
[BMPYR][Tf2N]	[BMPYR]	[Tf2N]	323.15	13	1	1	4	2	0	0	0	0	0	0	0	0	0	0	0	0	0	1	0	0	0	0	0	0	0	0	0	0	1	0	0	0	0	0	0	0	2	0	0	1	0	0	0	0.193
[BMPYR][Tf2N]	[BMPYR]	[Tf2N]	283.15	12	1	1	4	2	0	0	0	0	0	0	0	0	0	0	0	0	0	1	0	0	0	0	0	0	0	0	0	0	1	0	0	0	0	0	0	0	2	0	0	1	0	0	0	0.324
[BMPYR][Tf2N]	[BMPYR]	[Tf2N]	298.15	12	1	1	4	2	0	0	0	0	0	0	0	0	0	0	0	0	0	1	0	0	0	0	0	0	0	0	0	0	1	0	0	0	0	0	0	0	2	0	0	1	0	0	0	0.252
[BMPYR][Tf2N]	[BMPYR]	[Tf2N]	323.15	12	1	1	4	2	0	0	0	0	0	0	0	0	0	0	0	0	0	1	0	0	0	0	0	0	0	0	0	0	1	0	0	0	0	0	0	0	2	0	0	1	0	0	0	0.179
[BMPYR][Tf2N]	[BMPYR]	[Tf2N]	283.15	11	1	1	4	2	0	0	0	0	0	0	0	0	0	0	0	0	0	1	0	0	0	0	0	0	0	0	0	0	1	0	0	0	0	0	0	0	2	0	0	1	0	0	0	0.296
[BMPYR][Tf2N]	[BMPYR]	[Tf2N]	283.15	11	1	1	4	2	0	0	0	0	0	0	0	0	0	0	0	0	0	1	0	0	0	0	0	0	0	0	0	0	1	0	0	0	0	0	0	0	2	0	0	1	0	0	0	0.307
[BMPYR][Tf2N]	[BMPYR]	[Tf2N]	298.15	11	1	1	4	2	0	0	0	0	0	0	0	0	0	0	0	0	0	1	0	0	0	0	0	0	0	0	0	0	1	0	0	0	0	0	0	0	2	0	0	1	0	0	0	0.235
[BMPYR][Tf2N]	[BMPYR]	[Tf2N]	298.15	11	1	1	4	2	0	0	0	0	0	0	0	0	0	0	0	0	0	1	0	0	0	0	0	0	0	0	0	0	1	0	0	0	0	0	0	0	2	0	0	1	0	0	0	0.239
[BMPYR][Tf2N]	[BMPYR]	[Tf2N]	323.15	11	1	1	4	2	0	0	0	0	0	0	0	0	0	0	0	0	0	1	0	0	0	0	0	0	0	0	0	0	1	0	0	0	0	0	0	0	2	0	0	1	0	0	0	0.167
[BMPYR][Tf2N]	[BMPYR]	[Tf2N]	323.15	11	1	1	4	2	0	0	0	0	0	0	0	0	0	0	0	0	0	1	0	0	0	0	0	0	0	0	0	0	1	0	0	0	0	0	0	0	2	0	0	1	0	0	0	0.168
[BMPYR][Tf2N]	[BMPYR]	[Tf2N]	283.15	10	1	1	4	2	0	0	0	0	0	0	0	0	0	0	0	0	0	1	0	0	0	0	0	0	0	0	0	0	1	0	0	0	0	0	0	0	2	0	0	1	0	0	0	0.273
[BMPYR][Tf2N]	[BMPYR]	[Tf2N]	298.15	10	1	1	4	2	0	0	0	0	0	0	0	0	0	0	0	0	0	1	0	0	0	0	0	0	0	0	0	0	1	0	0	0	0	0	0	0	2	0	0	1	0	0	0	0.217
[BMPYR][Tf2N]	[BMPYR]	[Tf2N]	323.15	10	1	1	4	2	0	0	0	0	0	0	0	0	0	0	0	0	0	1	0	0	0	0	0	0	0	0	0	0	1	0	0	0	0	0	0	0	2	0	0	1	0	0	0	0.155
[BMPYR][Tf2N]	[BMPYR]	[Tf2N]	283.15	8.5	1	1	4	2	0	0	0	0	0	0	0	0	0	0	0	0	0	1	0	0	0	0	0	0	0	0	0	0	1	0	0	0	0	0	0	0	2	0	0	1	0	0	0	0.238
[BMPYR][Tf2N]	[BMPYR]	[Tf2N]	298.15	8.5	1	1	4	2	0	0	0	0	0	0	0	0	0	0	0	0	0	1	0	0	0	0	0	0	0	0	0	0	1	0	0	0	0	0	0	0	2	0	0	1	0	0	0	0.189
[BMPYR][Tf2N]	[BMPYR]	[Tf2N]	323.15	8.5	1	1	4	2	0	0	0	0	0	0	0	0	0	0	0	0	0	1	0	0	0	0	0	0	0	0	0	0	1	0	0	0	0	0	0	0	2	0	0	1	0	0	0	0.134
[BMPYR][Tf2N]	[BMPYR]	[Tf2N]	283.15	7	1	1	4	2	0	0	0	0	0	0	0	0	0	0	0	0	0	1	0	0	0	0	0	0	0	0	0	0	1	0	0	0	0	0	0	0	2	0	0	1	0	0	0	0.2
[BMPYR][Tf2N]	[BMPYR]	[Tf2N]	298.15	7	1	1	4	2	0	0	0	0	0	0	0	0	0	0	0	0	0	1	0	0	0	0	0	0	0	0	0	0	1	0	0	0	0	0	0	0	2	0	0	1	0	0	0	0.159
[BMPYR][Tf2N]	[BMPYR]	[Tf2N]	323.15	7	1	1	4	2	0	0	0	0	0	0	0	0	0	0	0	0	0	1	0	0	0	0	0	0	0	0	0	0	1	0	0	0	0	0	0	0	2	0	0	1	0	0	0	0.113
[BMPYR][Tf2N]	[BMPYR]	[Tf2N]	283.15	6	1	1	4	2	0	0	0	0	0	0	0	0	0	0	0	0	0	1	0	0	0	0	0	0	0	0	0	0	1	0	0	0	0	0	0	0	2	0	0	1	0	0	0	0.198
[BMPYR][Tf2N]	[BMPYR]	[Tf2N]	298.15	6	1	1	4	2	0	0	0	0	0	0	0	0	0	0	0	0	0	1	0	0	0	0	0	0	0	0	0	0	1	0	0	0	0	0	0	0	2	0	0	1	0	0	0	0.148
[BMPYR][Tf2N]	[BMPYR]	[Tf2N]	323.15	6	1	1	4	2	0	0	0	0	0	0	0	0	0	0	0	0	0	1	0	0	0	0	0	0	0	0	0	0	1	0	0	0	0	0	0	0	2	0	0	1	0	0	0	0.1
[BMPYR][Tf2N]	[BMPYR]	[Tf2N]	283.15	5.5	1	1	4	2	0	0	0	0	0	0	0	0	0	0	0	0	0	1	0	0	0	0	0	0	0	0	0	0	1	0	0	0	0	0	0	0	2	0	0	1	0	0	0	0.158
[BMPYR][Tf2N]	[BMPYR]	[Tf2N]	298.15	5.5	1	1	4	2	0	0	0	0	0	0	0	0	0	0	0	0	0	1	0	0	0	0	0	0	0	0	0	0	1	0	0	0	0	0	0	0	2	0	0	1	0	0	0	0.128
[BMPYR][Tf2N]	[BMPYR]	[Tf2N]	323.15	5.5	1	1	4	2	0	0	0	0	0	0	0	0	0	0	0	0	0	1	0	0	0	0	0	0	0	0	0	0	1	0	0	0	0	0	0	0	2	0	0	1	0	0	0	0.0908
[BMPYR][Tf2N]	[BMPYR]	[Tf2N]	283.15	4	1	1	4	2	0	0	0	0	0	0	0	0	0	0	0	0	0	1	0	0	0	0	0	0	0	0	0	0	1	0	0	0	0	0	0	0	2	0	0	1	0	0	0	0.114
[BMPYR][Tf2N]	[BMPYR]	[Tf2N]	298.15	4	1	1	4	2	0	0	0	0	0	0	0	0	0	0	0	0	0	1	0	0	0	0	0	0	0	0	0	0	1	0	0	0	0	0	0	0	2	0	0	1	0	0	0	0.0935
[BMPYR][Tf2N]	[BMPYR]	[Tf2N]	323.15	4	1	1	4	2	0	0	0	0	0	0	0	0	0	0	0	0	0	1	0	0	0	0	0	0	0	0	0	0	1	0	0	0	0	0	0	0	2	0	0	1	0	0	0	0.0673
[BMPYR][Tf2N]	[BMPYR]	[Tf2N]	283.15	2.5	1	1	4	2	0	0	0	0	0	0	0	0	0	0	0	0	0	1	0	0	0	0	0	0	0	0	0	0	1	0	0	0	0	0	0	0	2	0	0	1	0	0	0	0.0673
[BMPYR][Tf2N]	[BMPYR]	[Tf2N]	298.15	2.5	1	1	4	2	0	0	0	0	0	0	0	0	0	0	0	0	0	1	0	0	0	0	0	0	0	0	0	0	1	0	0	0	0	0	0	0	2	0	0	1	0	0	0	0.0576
[BMPYR][Tf2N]	[BMPYR]	[Tf2N]	323.15	2.5	1	1	4	2	0	0	0	0	0	0	0	0	0	0	0	0	0	1	0	0	0	0	0	0	0	0	0	0	1	0	0	0	0	0	0	0	2	0	0	1	0	0	0	0.041
[BMPYR][Tf2N]	[BMPYR]	[Tf2N]	298.15	2	1	1	4	2	0	0	0	0	0	0	0	0	0	0	0	0	0	1	0	0	0	0	0	0	0	0	0	0	1	0	0	0	0	0	0	0	2	0	0	1	0	0	0	0.0585
[BMPYR][Tf2N]	[BMPYR]	[Tf2N]	323.15	2	1	1	4	2	0	0	0	0	0	0	0	0	0	0	0	0	0	1	0	0	0	0	0	0	0	0	0	0	1	0	0	0	0	0	0	0	2	0	0	1	0	0	0	0.0362
[BMPYR][Tf2N]	[BMPYR]	[Tf2N]	283.15	2	1	1	4	2	0	0	0	0	0	0	0	0	0	0	0	0	0	1	0	0	0	0	0	0	0	0	0	0	1	0	0	0	0	0	0	0	2	0	0	1	0	0	0	0.0874
[BMPYR][Tf2N]	[BMPYR]	[Tf2N]	283.15	1	1	1	4	2	0	0	0	0	0	0	0	0	0	0	0	0	0	1	0	0	0	0	0	0	0	0	0	0	1	0	0	0	0	0	0	0	2	0	0	1	0	0	0	0.0267
[BMPYR][Tf2N]	[BMPYR]	[Tf2N]	298.15	0.999	1	1	4	2	0	0	0	0	0	0	0	0	0	0	0	0	0	1	0	0	0	0	0	0	0	0	0	0	1	0	0	0	0	0	0	0	2	0	0	1	0	0	0	0.0233
[BMPYR][Tf2N]	[BMPYR]	[Tf2N]	323.15	0.999	1	1	4	2	0	0	0	0	0	0	0	0	0	0	0	0	0	1	0	0	0	0	0	0	0	0	0	0	1	0	0	0	0	0	0	0	2	0	0	1	0	0	0	0.0168
[BMPYR][Tf2N]	[BMPYR]	[Tf2N]	323.15	0.5	1	1	4	2	0	0	0	0	0	0	0	0	0	0	0	0	0	1	0	0	0	0	0	0	0	0	0	0	1	0	0	0	0	0	0	0	2	0	0	1	0	0	0	0.00777
[BMPYR][Tf2N]	[BMPYR]	[Tf2N]	283.15	0.499	1	1	4	2	0	0	0	0	0	0	0	0	0	0	0	0	0	1	0	0	0	0	0	0	0	0	0	0	1	0	0	0	0	0	0	0	2	0	0	1	0	0	0	0.0118
[BMPYR][Tf2N]	[BMPYR]	[Tf2N]	298.15	0.499	1	1	4	2	0	0	0	0	0	0	0	0	0	0	0	0	0	1	0	0	0	0	0	0	0	0	0	0	1	0	0	0	0	0	0	0	2	0	0	1	0	0	0	0.0108
[BMPYR][Tf2N]	[BMPYR]	[Tf2N]	323.15	0.199	1	1	4	2	0	0	0	0	0	0	0	0	0	0	0	0	0	1	0	0	0	0	0	0	0	0	0	0	1	0	0	0	0	0	0	0	2	0	0	1	0	0	0	0.00343
[BMPYR][Tf2N]	[BMPYR]	[Tf2N]	298.15	0.199	1	1	4	2	0	0	0	0	0	0	0	0	0	0	0	0	0	1	0	0	0	0	0	0	0	0	0	0	1	0	0	0	0	0	0	0	2	0	0	1	0	0	0	0.0101
[BMPYR][Tf2N]	[BMPYR]	[Tf2N]	283.15	0.198	1	1	4	2	0	0	0	0	0	0	0	0	0	0	0	0	0	1	0	0	0	0	0	0	0	0	0	0	1	0	0	0	0	0	0	0	2	0	0	1	0	0	0	0.0264
[BMPYR][Tf2N]	[BMPYR]	[Tf2N]	323.15	0.0992	1	1	4	2	0	0	0	0	0	0	0	0	0	0	0	0	0	1	0	0	0	0	0	0	0	0	0	0	1	0	0	0	0	0	0	0	2	0	0	1	0	0	0	0.000802
[BMPYR][Tf2N]	[BMPYR]	[Tf2N]	283.15	0.0989	1	1	4	2	0	0	0	0	0	0	0	0	0	0	0	0	0	1	0	0	0	0	0	0	0	0	0	0	1	0	0	0	0	0	0	0	2	0	0	1	0	0	0	0.00194
[BMPYR][Tf2N]	[BMPYR]	[Tf2N]	298.15	0.0989	1	1	4	2	0	0	0	0	0	0	0	0	0	0	0	0	0	1	0	0	0	0	0	0	0	0	0	0	1	0	0	0	0	0	0	0	2	0	0	1	0	0	0	0.00198
[BMPYR][Tf2N]	[BMPYR]	[Tf2N]	298.15	0.0731	1	1	4	2	0	0	0	0	0	0	0	0	0	0	0	0	0	1	0	0	0	0	0	0	0	0	0	0	1	0	0	0	0	0	0	0	2	0	0	1	0	0	0	0.00273
[BMPYR][Tf2N]	[BMPYR]	[Tf2N]	283.15	0.0731	1	1	4	2	0	0	0	0	0	0	0	0	0	0	0	0	0	1	0	0	0	0	0	0	0	0	0	0	1	0	0	0	0	0	0	0	2	0	0	1	0	0	0	0.0128
[BMPYR][Tf2N]	[BMPYR]	[Tf2N]	283.15	0.0518	1	1	4	2	0	0	0	0	0	0	0	0	0	0	0	0	0	1	0	0	0	0	0	0	0	0	0	0	1	0	0	0	0	0	0	0	2	0	0	1	0	0	0	0.000527
[BMPYR][Tf2N]	[BMPYR]	[Tf2N]	298.15	0.0481	1	1	4	2	0	0	0	0	0	0	0	0	0	0	0	0	0	1	0	0	0	0	0	0	0	0	0	0	1	0	0	0	0	0	0	0	2	0	0	1	0	0	0	0.000689
[BMPYR][Tf2N]	[BMPYR]	[Tf2N]	323.15	0.048	1	1	4	2	0	0	0	0	0	0	0	0	0	0	0	0	0	1	0	0	0	0	0	0	0	0	0	0	1	0	0	0	0	0	0	0	2	0	0	1	0	0	0	0.000111
[BMPYR][Tf2N]	[BMPYR]	[Tf2N]	323.15	0.0241	1	1	4	2	0	0	0	0	0	0	0	0	0	0	0	0	0	1	0	0	0	0	0	0	0	0	0	0	1	0	0	0	0	0	0	0	2	0	0	1	0	0	0	0.00011
[BMPYR][Tf2N]	[BMPYR]	[Tf2N]	283.15	0.0235	1	1	4	2	0	0	0	0	0	0	0	0	0	0	0	0	0	1	0	0	0	0	0	0	0	0	0	0	1	0	0	0	0	0	0	0	2	0	0	1	0	0	0	0.00708
[BMPYR][Tf2N]	[BMPYR]	[Tf2N]	283.15	0.0225	1	1	4	2	0	0	0	0	0	0	0	0	0	0	0	0	0	1	0	0	0	0	0	0	0	0	0	0	1	0	0	0	0	0	0	0	2	0	0	1	0	0	0	0.000107
[BMPYR][Tf2N]	[BMPYR]	[Tf2N]	323.15	0.0225	1	1	4	2	0	0	0	0	0	0	0	0	0	0	0	0	0	1	0	0	0	0	0	0	0	0	0	0	1	0	0	0	0	0	0	0	2	0	0	1	0	0	0	0.000868
[BMPYR][Tf2N]	[BMPYR]	[Tf2N]	298.15	0.0124	1	1	4	2	0	0	0	0	0	0	0	0	0	0	0	0	0	1	0	0	0	0	0	0	0	0	0	0	1	0	0	0	0	0	0	0	2	0	0	1	0	0	0	0.000161
[N1,4,4,4][Tf2N]	[N1,4,4,4]	[Tf2N]	298.15	5.5	1	3	4	4	0	0	0	0	0	0	0	0	0	0	1	0	0	0	0	0	0	0	0	0	0	0	0	0	1	0	0	0	0	0	0	0	2	0	0	1	0	0	0	0.114
[N1,4,4,4][Tf2N]	[N1,4,4,4]	[Tf2N]	298.15	5.5	1	3	4	4	0	0	0	0	0	0	0	0	0	0	1	0	0	0	0	0	0	0	0	0	0	0	0	0	1	0	0	0	0	0	0	0	2	0	0	1	0	0	0	0.114
[N1,4,4,4][Tf2N]	[N1,4,4,4]	[Tf2N]	298.15	4.99	1	3	4	4	0	0	0	0	0	0	0	0	0	0	1	0	0	0	0	0	0	0	0	0	0	0	0	0	1	0	0	0	0	0	0	0	2	0	0	1	0	0	0	0.105
[N1,4,4,4][Tf2N]	[N1,4,4,4]	[Tf2N]	298.15	4	1	3	4	4	0	0	0	0	0	0	0	0	0	0	1	0	0	0	0	0	0	0	0	0	0	0	0	0	1	0	0	0	0	0	0	0	2	0	0	1	0	0	0	0.0855
[N1,4,4,4][Tf2N]	[N1,4,4,4]	[Tf2N]	298.15	2.5	1	3	4	4	0	0	0	0	0	0	0	0	0	0	1	0	0	0	0	0	0	0	0	0	0	0	0	0	1	0	0	0	0	0	0	0	2	0	0	1	0	0	0	0.0547
[N1,4,4,4][Tf2N]	[N1,4,4,4]	[Tf2N]	298.15	2	1	3	4	4	0	0	0	0	0	0	0	0	0	0	1	0	0	0	0	0	0	0	0	0	0	0	0	0	1	0	0	0	0	0	0	0	2	0	0	1	0	0	0	0.0444
[N1,4,4,4][Tf2N]	[N1,4,4,4]	[Tf2N]	298.15	0.998	1	3	4	4	0	0	0	0	0	0	0	0	0	0	1	0	0	0	0	0	0	0	0	0	0	0	0	0	1	0	0	0	0	0	0	0	2	0	0	1	0	0	0	0.0227
[N1,4,4,4][Tf2N]	[N1,4,4,4]	[Tf2N]	298.15	0.498	1	3	4	4	0	0	0	0	0	0	0	0	0	0	1	0	0	0	0	0	0	0	0	0	0	0	0	0	1	0	0	0	0	0	0	0	2	0	0	1	0	0	0	0.0112
[N1,4,4,4][Tf2N]	[N1,4,4,4]	[Tf2N]	298.15	0.198	1	3	4	4	0	0	0	0	0	0	0	0	0	0	1	0	0	0	0	0	0	0	0	0	0	0	0	0	1	0	0	0	0	0	0	0	2	0	0	1	0	0	0	0.00373
[N1,4,4,4][Tf2N]	[N1,4,4,4]	[Tf2N]	298.15	0.0989	1	3	4	4	0	0	0	0	0	0	0	0	0	0	1	0	0	0	0	0	0	0	0	0	0	0	0	0	1	0	0	0	0	0	0	0	2	0	0	1	0	0	0	0.00212
[N1,4,4,4][Tf2N]	[N1,4,4,4]	[Tf2N]	298.15	0.0756	1	3	4	4	0	0	0	0	0	0	0	0	0	0	1	0	0	0	0	0	0	0	0	0	0	0	0	0	1	0	0	0	0	0	0	0	2	0	0	1	0	0	0	0.000397
[N1,4,4,4][Tf2N]	[N1,4,4,4]	[Tf2N]	298.15	0.0473	1	3	4	4	0	0	0	0	0	0	0	0	0	0	1	0	0	0	0	0	0	0	0	0	0	0	0	0	1	0	0	0	0	0	0	0	2	0	0	1	0	0	0	0.000883
[P1,4,4,4][TOS]	[P1,4,4,4]	[TOS]	323.15	13	1	3	4	4	0	0	0	0	0	0	0	0	0	0	0	1	0	0	0	0	0	0	0	0	0	0	0	0	0	0	1	0	0	0	0	0	1	1	1	0	0	0	0	0.121
[P1,4,4,4][TOS]	[P1,4,4,4]	[TOS]	323.15	13	1	3	4	4	0	0	0	0	0	0	0	0	0	0	0	1	0	0	0	0	0	0	0	0	0	0	0	0	0	0	1	0	0	0	0	0	1	1	1	0	0	0	0	0.121
[P1,4,4,4][TOS]	[P1,4,4,4]	[TOS]	323.15	12.5	1	3	4	4	0	0	0	0	0	0	0	0	0	0	0	1	0	0	0	0	0	0	0	0	0	0	0	0	0	0	1	0	0	0	0	0	1	1	1	0	0	0	0	0.116
[P1,4,4,4][TOS]	[P1,4,4,4]	[TOS]	323.15	12	1	3	4	4	0	0	0	0	0	0	0	0	0	0	0	1	0	0	0	0	0	0	0	0	0	0	0	0	0	0	1	0	0	0	0	0	1	1	1	0	0	0	0	0.112
[P1,4,4,4][TOS]	[P1,4,4,4]	[TOS]	323.15	11.5	1	3	4	4	0	0	0	0	0	0	0	0	0	0	0	1	0	0	0	0	0	0	0	0	0	0	0	0	0	0	1	0	0	0	0	0	1	1	1	0	0	0	0	0.108
[P1,4,4,4][TOS]	[P1,4,4,4]	[TOS]	323.15	11	1	3	4	4	0	0	0	0	0	0	0	0	0	0	0	1	0	0	0	0	0	0	0	0	0	0	0	0	0	0	1	0	0	0	0	0	1	1	1	0	0	0	0	0.105
[P1,4,4,4][TOS]	[P1,4,4,4]	[TOS]	323.15	10.5	1	3	4	4	0	0	0	0	0	0	0	0	0	0	0	1	0	0	0	0	0	0	0	0	0	0	0	0	0	0	1	0	0	0	0	0	1	1	1	0	0	0	0	0.101
[P1,4,4,4][TOS]	[P1,4,4,4]	[TOS]	323.15	10	1	3	4	4	0	0	0	0	0	0	0	0	0	0	0	1	0	0	0	0	0	0	0	0	0	0	0	0	0	0	1	0	0	0	0	0	1	1	1	0	0	0	0	0.0977
[P1,4,4,4][TOS]	[P1,4,4,4]	[TOS]	323.15	9.5	1	3	4	4	0	0	0	0	0	0	0	0	0	0	0	1	0	0	0	0	0	0	0	0	0	0	0	0	0	0	1	0	0	0	0	0	1	1	1	0	0	0	0	0.0926
[P1,4,4,4][TOS]	[P1,4,4,4]	[TOS]	323.15	9	1	3	4	4	0	0	0	0	0	0	0	0	0	0	0	1	0	0	0	0	0	0	0	0	0	0	0	0	0	0	1	0	0	0	0	0	1	1	1	0	0	0	0	0.0889
[P1,4,4,4][TOS]	[P1,4,4,4]	[TOS]	323.15	8.5	1	3	4	4	0	0	0	0	0	0	0	0	0	0	0	1	0	0	0	0	0	0	0	0	0	0	0	0	0	0	1	0	0	0	0	0	1	1	1	0	0	0	0	0.0832
[P1,4,4,4][TOS]	[P1,4,4,4]	[TOS]	323.15	8	1	3	4	4	0	0	0	0	0	0	0	0	0	0	0	1	0	0	0	0	0	0	0	0	0	0	0	0	0	0	1	0	0	0	0	0	1	1	1	0	0	0	0	0.0808
[P1,4,4,4][TOS]	[P1,4,4,4]	[TOS]	323.15	7.5	1	3	4	4	0	0	0	0	0	0	0	0	0	0	0	1	0	0	0	0	0	0	0	0	0	0	0	0	0	0	1	0	0	0	0	0	1	1	1	0	0	0	0	0.0748
[P1,4,4,4][TOS]	[P1,4,4,4]	[TOS]	323.15	7	1	3	4	4	0	0	0	0	0	0	0	0	0	0	0	1	0	0	0	0	0	0	0	0	0	0	0	0	0	0	1	0	0	0	0	0	1	1	1	0	0	0	0	0.0713
[P1,4,4,4][TOS]	[P1,4,4,4]	[TOS]	323.15	6.5	1	3	4	4	0	0	0	0	0	0	0	0	0	0	0	1	0	0	0	0	0	0	0	0	0	0	0	0	0	0	1	0	0	0	0	0	1	1	1	0	0	0	0	0.0655
[P1,4,4,4][TOS]	[P1,4,4,4]	[TOS]	323.15	6	1	3	4	4	0	0	0	0	0	0	0	0	0	0	0	1	0	0	0	0	0	0	0	0	0	0	0	0	0	0	1	0	0	0	0	0	1	1	1	0	0	0	0	0.0613
[P1,4,4,4][TOS]	[P1,4,4,4]	[TOS]	323.15	5.5	1	3	4	4	0	0	0	0	0	0	0	0	0	0	0	1	0	0	0	0	0	0	0	0	0	0	0	0	0	0	1	0	0	0	0	0	1	1	1	0	0	0	0	0.0559
[P1,4,4,4][TOS]	[P1,4,4,4]	[TOS]	323.15	5	1	3	4	4	0	0	0	0	0	0	0	0	0	0	0	1	0	0	0	0	0	0	0	0	0	0	0	0	0	0	1	0	0	0	0	0	1	1	1	0	0	0	0	0.0504
[P1,4,4,4][TOS]	[P1,4,4,4]	[TOS]	323.15	4.5	1	3	4	4	0	0	0	0	0	0	0	0	0	0	0	1	0	0	0	0	0	0	0	0	0	0	0	0	0	0	1	0	0	0	0	0	1	1	1	0	0	0	0	0.0467
[P1,4,4,4][TOS]	[P1,4,4,4]	[TOS]	323.15	4	1	3	4	4	0	0	0	0	0	0	0	0	0	0	0	1	0	0	0	0	0	0	0	0	0	0	0	0	0	0	1	0	0	0	0	0	1	1	1	0	0	0	0	0.0411
[P1,4,4,4][TOS]	[P1,4,4,4]	[TOS]	323.15	3.5	1	3	4	4	0	0	0	0	0	0	0	0	0	0	0	1	0	0	0	0	0	0	0	0	0	0	0	0	0	0	1	0	0	0	0	0	1	1	1	0	0	0	0	0.038
[P1,4,4,4][TOS]	[P1,4,4,4]	[TOS]	323.15	3	1	3	4	4	0	0	0	0	0	0	0	0	0	0	0	1	0	0	0	0	0	0	0	0	0	0	0	0	0	0	1	0	0	0	0	0	1	1	1	0	0	0	0	0.0329
[P1,4,4,4][TOS]	[P1,4,4,4]	[TOS]	323.15	2.5	1	3	4	4	0	0	0	0	0	0	0	0	0	0	0	1	0	0	0	0	0	0	0	0	0	0	0	0	0	0	1	0	0	0	0	0	1	1	1	0	0	0	0	0.0282
[P1,4,4,4][TOS]	[P1,4,4,4]	[TOS]	323.15	2	1	3	4	4	0	0	0	0	0	0	0	0	0	0	0	1	0	0	0	0	0	0	0	0	0	0	0	0	0	0	1	0	0	0	0	0	1	1	1	0	0	0	0	0.0222
[P1,4,4,4][TOS]	[P1,4,4,4]	[TOS]	323.15	1.5	1	3	4	4	0	0	0	0	0	0	0	0	0	0	0	1	0	0	0	0	0	0	0	0	0	0	0	0	0	0	1	0	0	0	0	0	1	1	1	0	0	0	0	0.0173
[P1,4,4,4][TOS]	[P1,4,4,4]	[TOS]	323.15	0.599	1	3	4	4	0	0	0	0	0	0	0	0	0	0	0	1	0	0	0	0	0	0	0	0	0	0	0	0	0	0	1	0	0	0	0	0	1	1	1	0	0	0	0	0.00611
[P1,4,4,4][TOS]	[P1,4,4,4]	[TOS]	323.15	0.5	1	3	4	4	0	0	0	0	0	0	0	0	0	0	0	1	0	0	0	0	0	0	0	0	0	0	0	0	0	0	1	0	0	0	0	0	1	1	1	0	0	0	0	0.00614
[P1,4,4,4][TOS]	[P1,4,4,4]	[TOS]	323.15	0.198	1	3	4	4	0	0	0	0	0	0	0	0	0	0	0	1	0	0	0	0	0	0	0	0	0	0	0	0	0	0	1	0	0	0	0	0	1	1	1	0	0	0	0	0.002
[P1,4,4,4][TOS]	[P1,4,4,4]	[TOS]	323.15	0.096	1	3	4	4	0	0	0	0	0	0	0	0	0	0	0	1	0	0	0	0	0	0	0	0	0	0	0	0	0	0	1	0	0	0	0	0	1	1	1	0	0	0	0	0.00173
[P1,4,4,4][TOS]	[P1,4,4,4]	[TOS]	323.15	0.0111	1	3	4	4	0	0	0	0	0	0	0	0	0	0	0	1	0	0	0	0	0	0	0	0	0	0	0	0	0	0	1	0	0	0	0	0	1	1	1	0	0	0	0	0.000122
[BMIM][BF4]	[BMIM]	[BF4]	327.91	467.2	1	1	4	2	0	0	0	0	0	0	0	0	0	0	0	0	0	0	0	1	0	1	0	0	0	0	0	0	0	0	0	0	1	0	0	0	4	0	0	0	0	0	0	0.6017
[BMIM][BF4]	[BMIM]	[BF4]	322.94	432.4	1	1	4	2	0	0	0	0	0	0	0	0	0	0	0	0	0	0	0	1	0	1	0	0	0	0	0	0	0	0	0	0	1	0	0	0	4	0	0	0	0	0	0	0.6017
[BMIM][BF4]	[BMIM]	[BF4]	318.08	396.6	1	1	4	2	0	0	0	0	0	0	0	0	0	0	0	0	0	0	0	1	0	1	0	0	0	0	0	0	0	0	0	0	1	0	0	0	4	0	0	0	0	0	0	0.6017
[BMIM][BF4]	[BMIM]	[BF4]	357.9	388.6	1	1	4	2	0	0	0	0	0	0	0	0	0	0	0	0	0	0	0	1	0	1	0	0	0	0	0	0	0	0	0	0	1	0	0	0	4	0	0	0	0	0	0	0.5507
[BMIM][BF4]	[BMIM]	[BF4]	313.12	365.8	1	1	4	2	0	0	0	0	0	0	0	0	0	0	0	0	0	0	0	1	0	1	0	0	0	0	0	0	0	0	0	0	1	0	0	0	4	0	0	0	0	0	0	0.6017
[BMIM][BF4]	[BMIM]	[BF4]	352.69	365.8	1	1	4	2	0	0	0	0	0	0	0	0	0	0	0	0	0	0	0	1	0	1	0	0	0	0	0	0	0	0	0	0	1	0	0	0	4	0	0	0	0	0	0	0.5507
[BMIM][BF4]	[BMIM]	[BF4]	347.66	338.2	1	1	4	2	0	0	0	0	0	0	0	0	0	0	0	0	0	0	0	1	0	1	0	0	0	0	0	0	0	0	0	0	1	0	0	0	4	0	0	0	0	0	0	0.5507
[BMIM][BF4]	[BMIM]	[BF4]	342.78	311.2	1	1	4	2	0	0	0	0	0	0	0	0	0	0	0	0	0	0	0	1	0	1	0	0	0	0	0	0	0	0	0	0	1	0	0	0	4	0	0	0	0	0	0	0.5507
[BMIM][BF4]	[BMIM]	[BF4]	337.86	284.6	1	1	4	2	0	0	0	0	0	0	0	0	0	0	0	0	0	0	0	1	0	1	0	0	0	0	0	0	0	0	0	0	1	0	0	0	4	0	0	0	0	0	0	0.5507
[BMIM][BF4]	[BMIM]	[BF4]	332.94	261.2	1	1	4	2	0	0	0	0	0	0	0	0	0	0	0	0	0	0	0	1	0	1	0	0	0	0	0	0	0	0	0	0	1	0	0	0	4	0	0	0	0	0	0	0.5507
[BMIM][BF4]	[BMIM]	[BF4]	327.96	230.6	1	1	4	2	0	0	0	0	0	0	0	0	0	0	0	0	0	0	0	1	0	1	0	0	0	0	0	0	0	0	0	0	1	0	0	0	4	0	0	0	0	0	0	0.5507
[BMIM][BF4]	[BMIM]	[BF4]	322.95	202.2	1	1	4	2	0	0	0	0	0	0	0	0	0	0	0	0	0	0	0	1	0	1	0	0	0	0	0	0	0	0	0	0	1	0	0	0	4	0	0	0	0	0	0	0.5507
[BMIM][BF4]	[BMIM]	[BF4]	318.07	174.6	1	1	4	2	0	0	0	0	0	0	0	0	0	0	0	0	0	0	0	1	0	1	0	0	0	0	0	0	0	0	0	0	1	0	0	0	4	0	0	0	0	0	0	0.5507
[BMIM][BF4]	[BMIM]	[BF4]	313.12	144.4	1	1	4	2	0	0	0	0	0	0	0	0	0	0	0	0	0	0	0	1	0	1	0	0	0	0	0	0	0	0	0	0	1	0	0	0	4	0	0	0	0	0	0	0.5507
[BMIM][BF4]	[BMIM]	[BF4]	367.92	128.88	1	1	4	2	0	0	0	0	0	0	0	0	0	0	0	0	0	0	0	1	0	1	0	0	0	0	0	0	0	0	0	0	1	0	0	0	4	0	0	0	0	0	0	0.4005
[BMIM][BF4]	[BMIM]	[BF4]	338.17	128.56	1	1	4	2	0	0	0	0	0	0	0	0	0	0	0	0	0	0	0	1	0	1	0	0	0	0	0	0	0	0	0	0	1	0	0	0	4	0	0	0	0	0	0	0.4825
[BMIM][BF4]	[BMIM]	[BF4]	363.02	119.68	1	1	4	2	0	0	0	0	0	0	0	0	0	0	0	0	0	0	0	1	0	1	0	0	0	0	0	0	0	0	0	0	1	0	0	0	4	0	0	0	0	0	0	0.4005
[BMIM][BF4]	[BMIM]	[BF4]	333.1	114.06	1	1	4	2	0	0	0	0	0	0	0	0	0	0	0	0	0	0	0	1	0	1	0	0	0	0	0	0	0	0	0	0	1	0	0	0	4	0	0	0	0	0	0	0.4825
[BMIM][BF4]	[BMIM]	[BF4]	357.69	110.63	1	1	4	2	0	0	0	0	0	0	0	0	0	0	0	0	0	0	0	1	0	1	0	0	0	0	0	0	0	0	0	0	1	0	0	0	4	0	0	0	0	0	0	0.4005
[BMIM][BF4]	[BMIM]	[BF4]	352.82	102.33	1	1	4	2	0	0	0	0	0	0	0	0	0	0	0	0	0	0	0	1	0	1	0	0	0	0	0	0	0	0	0	0	1	0	0	0	4	0	0	0	0	0	0	0.4005
[BMIM][BF4]	[BMIM]	[BF4]	327.99	100.71	1	1	4	2	0	0	0	0	0	0	0	0	0	0	0	0	0	0	0	1	0	1	0	0	0	0	0	0	0	0	0	0	1	0	0	0	4	0	0	0	0	0	0	0.4825
[BMIM][BF4]	[BMIM]	[BF4]	348.08	94.73	1	1	4	2	0	0	0	0	0	0	0	0	0	0	0	0	0	0	0	1	0	1	0	0	0	0	0	0	0	0	0	0	1	0	0	0	4	0	0	0	0	0	0	0.4005
[BMIM][BF4]	[BMIM]	[BF4]	323.1	89.21	1	1	4	2	0	0	0	0	0	0	0	0	0	0	0	0	0	0	0	1	0	1	0	0	0	0	0	0	0	0	0	0	1	0	0	0	4	0	0	0	0	0	0	0.4825
[BMIM][BF4]	[BMIM]	[BF4]	343.12	87.48	1	1	4	2	0	0	0	0	0	0	0	0	0	0	0	0	0	0	0	1	0	1	0	0	0	0	0	0	0	0	0	0	1	0	0	0	4	0	0	0	0	0	0	0.4005
[BMIM][BF4]	[BMIM]	[BF4]	338.28	80.53	1	1	4	2	0	0	0	0	0	0	0	0	0	0	0	0	0	0	0	1	0	1	0	0	0	0	0	0	0	0	0	0	1	0	0	0	4	0	0	0	0	0	0	0.4005
[BMIM][BF4]	[BMIM]	[BF4]	367.96	80.47	1	1	4	2	0	0	0	0	0	0	0	0	0	0	0	0	0	0	0	1	0	1	0	0	0	0	0	0	0	0	0	0	1	0	0	0	4	0	0	0	0	0	0	0.3035
[BMIM][BF4]	[BMIM]	[BF4]	318.16	79.31	1	1	4	2	0	0	0	0	0	0	0	0	0	0	0	0	0	0	0	1	0	1	0	0	0	0	0	0	0	0	0	0	1	0	0	0	4	0	0	0	0	0	0	0.4825
[BMIM][BF4]	[BMIM]	[BF4]	362.91	75.22	1	1	4	2	0	0	0	0	0	0	0	0	0	0	0	0	0	0	0	1	0	1	0	0	0	0	0	0	0	0	0	0	1	0	0	0	4	0	0	0	0	0	0	0.3035
[BMIM][BF4]	[BMIM]	[BF4]	333.19	73.43	1	1	4	2	0	0	0	0	0	0	0	0	0	0	0	0	0	0	0	1	0	1	0	0	0	0	0	0	0	0	0	0	1	0	0	0	4	0	0	0	0	0	0	0.4005
[BMIM][BF4]	[BMIM]	[BF4]	313.27	70.46	1	1	4	2	0	0	0	0	0	0	0	0	0	0	0	0	0	0	0	1	0	1	0	0	0	0	0	0	0	0	0	0	1	0	0	0	4	0	0	0	0	0	0	0.4825
[BMIM][BF4]	[BMIM]	[BF4]	357.96	70.12	1	1	4	2	0	0	0	0	0	0	0	0	0	0	0	0	0	0	0	1	0	1	0	0	0	0	0	0	0	0	0	0	1	0	0	0	4	0	0	0	0	0	0	0.3035
[BMIM][BF4]	[BMIM]	[BF4]	328.12	67.03	1	1	4	2	0	0	0	0	0	0	0	0	0	0	0	0	0	0	0	1	0	1	0	0	0	0	0	0	0	0	0	0	1	0	0	0	4	0	0	0	0	0	0	0.4005
[BMIM][BF4]	[BMIM]	[BF4]	353.11	65.12	1	1	4	2	0	0	0	0	0	0	0	0	0	0	0	0	0	0	0	1	0	1	0	0	0	0	0	0	0	0	0	0	1	0	0	0	4	0	0	0	0	0	0	0.3035
[BMIM][BF4]	[BMIM]	[BF4]	308.16	62.06	1	1	4	2	0	0	0	0	0	0	0	0	0	0	0	0	0	0	0	1	0	1	0	0	0	0	0	0	0	0	0	0	1	0	0	0	4	0	0	0	0	0	0	0.4825
[BMIM][BF4]	[BMIM]	[BF4]	323.22	60.98	1	1	4	2	0	0	0	0	0	0	0	0	0	0	0	0	0	0	0	1	0	1	0	0	0	0	0	0	0	0	0	0	1	0	0	0	4	0	0	0	0	0	0	0.4005
[BMIM][BF4]	[BMIM]	[BF4]	347.95	60.27	1	1	4	2	0	0	0	0	0	0	0	0	0	0	0	0	0	0	0	1	0	1	0	0	0	0	0	0	0	0	0	0	1	0	0	0	4	0	0	0	0	0	0	0.3035
[BMIM][BF4]	[BMIM]	[BF4]	342.73	55.77	1	1	4	2	0	0	0	0	0	0	0	0	0	0	0	0	0	0	0	1	0	1	0	0	0	0	0	0	0	0	0	0	1	0	0	0	4	0	0	0	0	0	0	0.3035
[BMIM][BF4]	[BMIM]	[BF4]	318.13	55.13	1	1	4	2	0	0	0	0	0	0	0	0	0	0	0	0	0	0	0	1	0	1	0	0	0	0	0	0	0	0	0	0	1	0	0	0	4	0	0	0	0	0	0	0.4005
[BMIM][BF4]	[BMIM]	[BF4]	303.16	54.96	1	1	4	2	0	0	0	0	0	0	0	0	0	0	0	0	0	0	0	1	0	1	0	0	0	0	0	0	0	0	0	0	1	0	0	0	4	0	0	0	0	0	0	0.4825
[BMIM][BF4]	[BMIM]	[BF4]	337.75	51.57	1	1	4	2	0	0	0	0	0	0	0	0	0	0	0	0	0	0	0	1	0	1	0	0	0	0	0	0	0	0	0	0	1	0	0	0	4	0	0	0	0	0	0	0.3035
[BMIM][BF4]	[BMIM]	[BF4]	313	49.53	1	1	4	2	0	0	0	0	0	0	0	0	0	0	0	0	0	0	0	1	0	1	0	0	0	0	0	0	0	0	0	0	1	0	0	0	4	0	0	0	0	0	0	0.4005
[BMIM][BF4]	[BMIM]	[BF4]	298.28	48.61	1	1	4	2	0	0	0	0	0	0	0	0	0	0	0	0	0	0	0	1	0	1	0	0	0	0	0	0	0	0	0	0	1	0	0	0	4	0	0	0	0	0	0	0.4825
[BMIM][BF4]	[BMIM]	[BF4]	332.82	47.57	1	1	4	2	0	0	0	0	0	0	0	0	0	0	0	0	0	0	0	1	0	1	0	0	0	0	0	0	0	0	0	0	1	0	0	0	4	0	0	0	0	0	0	0.3035
[BMIM][BF4]	[BMIM]	[BF4]	308.1	44.58	1	1	4	2	0	0	0	0	0	0	0	0	0	0	0	0	0	0	0	1	0	1	0	0	0	0	0	0	0	0	0	0	1	0	0	0	4	0	0	0	0	0	0	0.4005
[BMIM][BF4]	[BMIM]	[BF4]	368.22	44.18	1	1	4	2	0	0	0	0	0	0	0	0	0	0	0	0	0	0	0	1	0	1	0	0	0	0	0	0	0	0	0	0	1	0	0	0	4	0	0	0	0	0	0	0.1998
[BMIM][BF4]	[BMIM]	[BF4]	328.12	43.67	1	1	4	2	0	0	0	0	0	0	0	0	0	0	0	0	0	0	0	1	0	1	0	0	0	0	0	0	0	0	0	0	1	0	0	0	4	0	0	0	0	0	0	0.3035
[BMIM][BF4]	[BMIM]	[BF4]	293.32	43.01	1	1	4	2	0	0	0	0	0	0	0	0	0	0	0	0	0	0	0	1	0	1	0	0	0	0	0	0	0	0	0	0	1	0	0	0	4	0	0	0	0	0	0	0.4825
[BMIM][BF4]	[BMIM]	[BF4]	363.16	41.5	1	1	4	2	0	0	0	0	0	0	0	0	0	0	0	0	0	0	0	1	0	1	0	0	0	0	0	0	0	0	0	0	1	0	0	0	4	0	0	0	0	0	0	0.1998
[BMIM][BF4]	[BMIM]	[BF4]	323.16	40.02	1	1	4	2	0	0	0	0	0	0	0	0	0	0	0	0	0	0	0	1	0	1	0	0	0	0	0	0	0	0	0	0	1	0	0	0	4	0	0	0	0	0	0	0.3035
[BMIM][BF4]	[BMIM]	[BF4]	303.11	39.93	1	1	4	2	0	0	0	0	0	0	0	0	0	0	0	0	0	0	0	1	0	1	0	0	0	0	0	0	0	0	0	0	1	0	0	0	4	0	0	0	0	0	0	0.4005
[BMIM][BF4]	[BMIM]	[BF4]	358.16	38.84	1	1	4	2	0	0	0	0	0	0	0	0	0	0	0	0	0	0	0	1	0	1	0	0	0	0	0	0	0	0	0	0	1	0	0	0	4	0	0	0	0	0	0	0.1998
[BMIM][BF4]	[BMIM]	[BF4]	288.55	38.01	1	1	4	2	0	0	0	0	0	0	0	0	0	0	0	0	0	0	0	1	0	1	0	0	0	0	0	0	0	0	0	0	1	0	0	0	4	0	0	0	0	0	0	0.4825
[BMIM][BF4]	[BMIM]	[BF4]	318.28	36.67	1	1	4	2	0	0	0	0	0	0	0	0	0	0	0	0	0	0	0	1	0	1	0	0	0	0	0	0	0	0	0	0	1	0	0	0	4	0	0	0	0	0	0	0.3035
[BMIM][BF4]	[BMIM]	[BF4]	353.16	36.29	1	1	4	2	0	0	0	0	0	0	0	0	0	0	0	0	0	0	0	1	0	1	0	0	0	0	0	0	0	0	0	0	1	0	0	0	4	0	0	0	0	0	0	0.1998
[BMIM][BF4]	[BMIM]	[BF4]	298.15	35.73	1	1	4	2	0	0	0	0	0	0	0	0	0	0	0	0	0	0	0	1	0	1	0	0	0	0	0	0	0	0	0	0	1	0	0	0	4	0	0	0	0	0	0	0.4005
[BMIM][BF4]	[BMIM]	[BF4]	348.15	33.78	1	1	4	2	0	0	0	0	0	0	0	0	0	0	0	0	0	0	0	1	0	1	0	0	0	0	0	0	0	0	0	0	1	0	0	0	4	0	0	0	0	0	0	0.1998
[BMIM][BF4]	[BMIM]	[BF4]	283.39	33.46	1	1	4	2	0	0	0	0	0	0	0	0	0	0	0	0	0	0	0	1	0	1	0	0	0	0	0	0	0	0	0	0	1	0	0	0	4	0	0	0	0	0	0	0.4825
[BMIM][BF4]	[BMIM]	[BF4]	313.39	33.32	1	1	4	2	0	0	0	0	0	0	0	0	0	0	0	0	0	0	0	1	0	1	0	0	0	0	0	0	0	0	0	0	1	0	0	0	4	0	0	0	0	0	0	0.3035
[BMIM][BF4]	[BMIM]	[BF4]	293.33	31.98	1	1	4	2	0	0	0	0	0	0	0	0	0	0	0	0	0	0	0	1	0	1	0	0	0	0	0	0	0	0	0	0	1	0	0	0	4	0	0	0	0	0	0	0.4005
[BMIM][BF4]	[BMIM]	[BF4]	343.13	31.37	1	1	4	2	0	0	0	0	0	0	0	0	0	0	0	0	0	0	0	1	0	1	0	0	0	0	0	0	0	0	0	0	1	0	0	0	4	0	0	0	0	0	0	0.1998
[BMIM][BF4]	[BMIM]	[BF4]	308.36	30.12	1	1	4	2	0	0	0	0	0	0	0	0	0	0	0	0	0	0	0	1	0	1	0	0	0	0	0	0	0	0	0	0	1	0	0	0	4	0	0	0	0	0	0	0.3035
[BMIM][BF4]	[BMIM]	[BF4]	278.47	29.26	1	1	4	2	0	0	0	0	0	0	0	0	0	0	0	0	0	0	0	1	0	1	0	0	0	0	0	0	0	0	0	0	1	0	0	0	4	0	0	0	0	0	0	0.4825
[BMIM][BF4]	[BMIM]	[BF4]	338.12	29.09	1	1	4	2	0	0	0	0	0	0	0	0	0	0	0	0	0	0	0	1	0	1	0	0	0	0	0	0	0	0	0	0	1	0	0	0	4	0	0	0	0	0	0	0.1998
[BMIM][BF4]	[BMIM]	[BF4]	288.51	28.38	1	1	4	2	0	0	0	0	0	0	0	0	0	0	0	0	0	0	0	1	0	1	0	0	0	0	0	0	0	0	0	0	1	0	0	0	4	0	0	0	0	0	0	0.4005
[BMIM][BF4]	[BMIM]	[BF4]	303.4	27.22	1	1	4	2	0	0	0	0	0	0	0	0	0	0	0	0	0	0	0	1	0	1	0	0	0	0	0	0	0	0	0	0	1	0	0	0	4	0	0	0	0	0	0	0.3035
[BMIM][BF4]	[BMIM]	[BF4]	333.18	26.86	1	1	4	2	0	0	0	0	0	0	0	0	0	0	0	0	0	0	0	1	0	1	0	0	0	0	0	0	0	0	0	0	1	0	0	0	4	0	0	0	0	0	0	0.1998
[BMIM][BF4]	[BMIM]	[BF4]	283.52	25.08	1	1	4	2	0	0	0	0	0	0	0	0	0	0	0	0	0	0	0	1	0	1	0	0	0	0	0	0	0	0	0	0	1	0	0	0	4	0	0	0	0	0	0	0.4005
[BMIM][BF4]	[BMIM]	[BF4]	328.12	24.66	1	1	4	2	0	0	0	0	0	0	0	0	0	0	0	0	0	0	0	1	0	1	0	0	0	0	0	0	0	0	0	0	1	0	0	0	4	0	0	0	0	0	0	0.1998
[BMIM][BF4]	[BMIM]	[BF4]	298.47	24.47	1	1	4	2	0	0	0	0	0	0	0	0	0	0	0	0	0	0	0	1	0	1	0	0	0	0	0	0	0	0	0	0	1	0	0	0	4	0	0	0	0	0	0	0.3035
[BMIM][BF4]	[BMIM]	[BF4]	323.15	22.69	1	1	4	2	0	0	0	0	0	0	0	0	0	0	0	0	0	0	0	1	0	1	0	0	0	0	0	0	0	0	0	0	1	0	0	0	4	0	0	0	0	0	0	0.1998
[BMIM][BF4]	[BMIM]	[BF4]	278.68	22.33	1	1	4	2	0	0	0	0	0	0	0	0	0	0	0	0	0	0	0	1	0	1	0	0	0	0	0	0	0	0	0	0	1	0	0	0	4	0	0	0	0	0	0	0.4005
[BMIM][BF4]	[BMIM]	[BF4]	293.5	21.92	1	1	4	2	0	0	0	0	0	0	0	0	0	0	0	0	0	0	0	1	0	1	0	0	0	0	0	0	0	0	0	0	1	0	0	0	4	0	0	0	0	0	0	0.3035
[BMIM][BF4]	[BMIM]	[BF4]	318.12	20.74	1	1	4	2	0	0	0	0	0	0	0	0	0	0	0	0	0	0	0	1	0	1	0	0	0	0	0	0	0	0	0	0	1	0	0	0	4	0	0	0	0	0	0	0.1998
[BMIM][BF4]	[BMIM]	[BF4]	368.14	19.89	1	1	4	2	0	0	0	0	0	0	0	0	0	0	0	0	0	0	0	1	0	1	0	0	0	0	0	0	0	0	0	0	1	0	0	0	4	0	0	0	0	0	0	0.1022
[BMIM][BF4]	[BMIM]	[BF4]	288.47	19.57	1	1	4	2	0	0	0	0	0	0	0	0	0	0	0	0	0	0	0	1	0	1	0	0	0	0	0	0	0	0	0	0	1	0	0	0	4	0	0	0	0	0	0	0.3035
[BMIM][BF4]	[BMIM]	[BF4]	313.15	18.86	1	1	4	2	0	0	0	0	0	0	0	0	0	0	0	0	0	0	0	1	0	1	0	0	0	0	0	0	0	0	0	0	1	0	0	0	4	0	0	0	0	0	0	0.1998
[BMIM][BF4]	[BMIM]	[BF4]	363.16	18.75	1	1	4	2	0	0	0	0	0	0	0	0	0	0	0	0	0	0	0	1	0	1	0	0	0	0	0	0	0	0	0	0	1	0	0	0	4	0	0	0	0	0	0	0.1022
[BMIM][BF4]	[BMIM]	[BF4]	358.17	17.69	1	1	4	2	0	0	0	0	0	0	0	0	0	0	0	0	0	0	0	1	0	1	0	0	0	0	0	0	0	0	0	0	1	0	0	0	4	0	0	0	0	0	0	0.1022
[BMIM][BF4]	[BMIM]	[BF4]	283.61	17.42	1	1	4	2	0	0	0	0	0	0	0	0	0	0	0	0	0	0	0	1	0	1	0	0	0	0	0	0	0	0	0	0	1	0	0	0	4	0	0	0	0	0	0	0.3035
[BMIM][BF4]	[BMIM]	[BF4]	308.19	17.1	1	1	4	2	0	0	0	0	0	0	0	0	0	0	0	0	0	0	0	1	0	1	0	0	0	0	0	0	0	0	0	0	1	0	0	0	4	0	0	0	0	0	0	0.1998
[BMIM][BF4]	[BMIM]	[BF4]	353.16	16.64	1	1	4	2	0	0	0	0	0	0	0	0	0	0	0	0	0	0	0	1	0	1	0	0	0	0	0	0	0	0	0	0	1	0	0	0	4	0	0	0	0	0	0	0.1022
[BMIM][BF4]	[BMIM]	[BF4]	278.53	15.47	1	1	4	2	0	0	0	0	0	0	0	0	0	0	0	0	0	0	0	1	0	1	0	0	0	0	0	0	0	0	0	0	1	0	0	0	4	0	0	0	0	0	0	0.3035
[BMIM][BF4]	[BMIM]	[BF4]	303.19	15.42	1	1	4	2	0	0	0	0	0	0	0	0	0	0	0	0	0	0	0	1	0	1	0	0	0	0	0	0	0	0	0	0	1	0	0	0	4	0	0	0	0	0	0	0.1998
[BMIM][BF4]	[BMIM]	[BF4]	348.12	15.39	1	1	4	2	0	0	0	0	0	0	0	0	0	0	0	0	0	0	0	1	0	1	0	0	0	0	0	0	0	0	0	0	1	0	0	0	4	0	0	0	0	0	0	0.1022
[BMIM][BF4]	[BMIM]	[BF4]	343.14	14.38	1	1	4	2	0	0	0	0	0	0	0	0	0	0	0	0	0	0	0	1	0	1	0	0	0	0	0	0	0	0	0	0	1	0	0	0	4	0	0	0	0	0	0	0.1022
[BMIM][BF4]	[BMIM]	[BF4]	298.17	13.88	1	1	4	2	0	0	0	0	0	0	0	0	0	0	0	0	0	0	0	1	0	1	0	0	0	0	0	0	0	0	0	0	1	0	0	0	4	0	0	0	0	0	0	0.1998
[BMIM][BF4]	[BMIM]	[BF4]	338.16	13.44	1	1	4	2	0	0	0	0	0	0	0	0	0	0	0	0	0	0	0	1	0	1	0	0	0	0	0	0	0	0	0	0	1	0	0	0	4	0	0	0	0	0	0	0.1022
[BMIM][BF4]	[BMIM]	[BF4]	293.17	12.43	1	1	4	2	0	0	0	0	0	0	0	0	0	0	0	0	0	0	0	1	0	1	0	0	0	0	0	0	0	0	0	0	1	0	0	0	4	0	0	0	0	0	0	0.1998
[BMIM][BF4]	[BMIM]	[BF4]	333.16	12.39	1	1	4	2	0	0	0	0	0	0	0	0	0	0	0	0	0	0	0	1	0	1	0	0	0	0	0	0	0	0	0	0	1	0	0	0	4	0	0	0	0	0	0	0.1022
[BMIM][BF4]	[BMIM]	[BF4]	328.14	11.43	1	1	4	2	0	0	0	0	0	0	0	0	0	0	0	0	0	0	0	1	0	1	0	0	0	0	0	0	0	0	0	0	1	0	0	0	4	0	0	0	0	0	0	0.1022
[BMIM][BF4]	[BMIM]	[BF4]	323.11	10.44	1	1	4	2	0	0	0	0	0	0	0	0	0	0	0	0	0	0	0	1	0	1	0	0	0	0	0	0	0	0	0	0	1	0	0	0	4	0	0	0	0	0	0	0.1022
[BMIM][BF4]	[BMIM]	[BF4]	318.11	9.68	1	1	4	2	0	0	0	0	0	0	0	0	0	0	0	0	0	0	0	1	0	1	0	0	0	0	0	0	0	0	0	0	1	0	0	0	4	0	0	0	0	0	0	0.1022
[BMIM][BF4]	[BMIM]	[BF4]	313.19	8.85	1	1	4	2	0	0	0	0	0	0	0	0	0	0	0	0	0	0	0	1	0	1	0	0	0	0	0	0	0	0	0	0	1	0	0	0	4	0	0	0	0	0	0	0.1022
[BMIM][BF4]	[BMIM]	[BF4]	308.15	8.03	1	1	4	2	0	0	0	0	0	0	0	0	0	0	0	0	0	0	0	1	0	1	0	0	0	0	0	0	0	0	0	0	1	0	0	0	4	0	0	0	0	0	0	0.1022
[BMIM][BF4]	[BMIM]	[BF4]	303.15	7.4	1	1	4	2	0	0	0	0	0	0	0	0	0	0	0	0	0	0	0	1	0	1	0	0	0	0	0	0	0	0	0	0	1	0	0	0	4	0	0	0	0	0	0	0.1022
[BMIM][BF4]	[BMIM]	[BF4]	298.14	6.59	1	1	4	2	0	0	0	0	0	0	0	0	0	0	0	0	0	0	0	1	0	1	0	0	0	0	0	0	0	0	0	0	1	0	0	0	4	0	0	0	0	0	0	0.1022
[BMIM][BF4]	[BMIM]	[BF4]	293.13	5.87	1	1	4	2	0	0	0	0	0	0	0	0	0	0	0	0	0	0	0	1	0	1	0	0	0	0	0	0	0	0	0	0	1	0	0	0	4	0	0	0	0	0	0	0.1022
[BMIM][BF4]	[BMIM]	[BF4]	298.05	20.002	1	1	4	2	0	0	0	0	0	0	0	0	0	0	0	0	0	0	0	1	0	1	0	0	0	0	0	0	0	0	0	0	1	0	0	0	4	0	0	0	0	0	0	0.277
[BMIM][BF4]	[BMIM]	[BF4]	283.05	20.0019	1	1	4	2	0	0	0	0	0	0	0	0	0	0	0	0	0	0	0	1	0	1	0	0	0	0	0	0	0	0	0	0	1	0	0	0	4	0	0	0	0	0	0	0.364
[BMIM][BF4]	[BMIM]	[BF4]	323.15	20	1	1	4	2	0	0	0	0	0	0	0	0	0	0	0	0	0	0	0	1	0	1	0	0	0	0	0	0	0	0	0	0	1	0	0	0	4	0	0	0	0	0	0	0.182
[BMIM][BF4]	[BMIM]	[BF4]	348.05	19.999	1	1	4	2	0	0	0	0	0	0	0	0	0	0	0	0	0	0	0	1	0	1	0	0	0	0	0	0	0	0	0	0	1	0	0	0	4	0	0	0	0	0	0	0.133
[BMIM][BF4]	[BMIM]	[BF4]	348.15	15.0024	1	1	4	2	0	0	0	0	0	0	0	0	0	0	0	0	0	0	0	1	0	1	0	0	0	0	0	0	0	0	0	0	1	0	0	0	4	0	0	0	0	0	0	0.103
[BMIM][BF4]	[BMIM]	[BF4]	323.15	15.0011	1	1	4	2	0	0	0	0	0	0	0	0	0	0	0	0	0	0	0	1	0	1	0	0	0	0	0	0	0	0	0	0	1	0	0	0	4	0	0	0	0	0	0	0.143
[BMIM][BF4]	[BMIM]	[BF4]	297.95	15.0008	1	1	4	2	0	0	0	0	0	0	0	0	0	0	0	0	0	0	0	1	0	1	0	0	0	0	0	0	0	0	0	0	1	0	0	0	4	0	0	0	0	0	0	0.221
[BMIM][BF4]	[BMIM]	[BF4]	283.15	15.0006	1	1	4	2	0	0	0	0	0	0	0	0	0	0	0	0	0	0	0	1	0	1	0	0	0	0	0	0	0	0	0	0	1	0	0	0	4	0	0	0	0	0	0	0.295
[BMIM][BF4]	[BMIM]	[BF4]	298.15	13.0022	1	1	4	2	0	0	0	0	0	0	0	0	0	0	0	0	0	0	0	1	0	1	0	0	0	0	0	0	0	0	0	0	1	0	0	0	4	0	0	0	0	0	0	0.197
[BMIM][BF4]	[BMIM]	[BF4]	283.05	13.0019	1	1	4	2	0	0	0	0	0	0	0	0	0	0	0	0	0	0	0	1	0	1	0	0	0	0	0	0	0	0	0	0	1	0	0	0	4	0	0	0	0	0	0	0.265
[BMIM][BF4]	[BMIM]	[BF4]	348.15	13	1	1	4	2	0	0	0	0	0	0	0	0	0	0	0	0	0	0	0	1	0	1	0	0	0	0	0	0	0	0	0	0	1	0	0	0	4	0	0	0	0	0	0	0.089
[BMIM][BF4]	[BMIM]	[BF4]	323.15	12.9965	1	1	4	2	0	0	0	0	0	0	0	0	0	0	0	0	0	0	0	1	0	1	0	0	0	0	0	0	0	0	0	0	1	0	0	0	4	0	0	0	0	0	0	0.127
[BMIM][BF4]	[BMIM]	[BF4]	347.95	10.0027	1	1	4	2	0	0	0	0	0	0	0	0	0	0	0	0	0	0	0	1	0	1	0	0	0	0	0	0	0	0	0	0	1	0	0	0	4	0	0	0	0	0	0	0.071
[BMIM][BF4]	[BMIM]	[BF4]	323.15	10.002	1	1	4	2	0	0	0	0	0	0	0	0	0	0	0	0	0	0	0	1	0	1	0	0	0	0	0	0	0	0	0	0	1	0	0	0	4	0	0	0	0	0	0	0.1
[BMIM][BF4]	[BMIM]	[BF4]	283.05	9.9967	1	1	4	2	0	0	0	0	0	0	0	0	0	0	0	0	0	0	0	1	0	1	0	0	0	0	0	0	0	0	0	0	1	0	0	0	4	0	0	0	0	0	0	0.216
[BMIM][BF4]	[BMIM]	[BF4]	297.95	9.9967	1	1	4	2	0	0	0	0	0	0	0	0	0	0	0	0	0	0	0	1	0	1	0	0	0	0	0	0	0	0	0	0	1	0	0	0	4	0	0	0	0	0	0	0.158
[BMIM][BF4]	[BMIM]	[BF4]	298.15	7.0022	1	1	4	2	0	0	0	0	0	0	0	0	0	0	0	0	0	0	0	1	0	1	0	0	0	0	0	0	0	0	0	0	1	0	0	0	4	0	0	0	0	0	0	0.116
[BMIM][BF4]	[BMIM]	[BF4]	283.25	6.9962	1	1	4	2	0	0	0	0	0	0	0	0	0	0	0	0	0	0	0	1	0	1	0	0	0	0	0	0	0	0	0	0	1	0	0	0	4	0	0	0	0	0	0	0.159
[BMIM][BF4]	[BMIM]	[BF4]	323.15	6.9962	1	1	4	2	0	0	0	0	0	0	0	0	0	0	0	0	0	0	0	1	0	1	0	0	0	0	0	0	0	0	0	0	1	0	0	0	4	0	0	0	0	0	0	0.073
[BMIM][BF4]	[BMIM]	[BF4]	348.15	6.9956	1	1	4	2	0	0	0	0	0	0	0	0	0	0	0	0	0	0	0	1	0	1	0	0	0	0	0	0	0	0	0	0	1	0	0	0	4	0	0	0	0	0	0	0.051
[BMIM][BF4]	[BMIM]	[BF4]	348.05	4.0018	1	1	4	2	0	0	0	0	0	0	0	0	0	0	0	0	0	0	0	1	0	1	0	0	0	0	0	0	0	0	0	0	1	0	0	0	4	0	0	0	0	0	0	0.03
[BMIM][BF4]	[BMIM]	[BF4]	283.05	4.001	1	1	4	2	0	0	0	0	0	0	0	0	0	0	0	0	0	0	0	1	0	1	0	0	0	0	0	0	0	0	0	0	1	0	0	0	4	0	0	0	0	0	0	0.096
[BMIM][BF4]	[BMIM]	[BF4]	323.15	3.997	1	1	4	2	0	0	0	0	0	0	0	0	0	0	0	0	0	0	0	1	0	1	0	0	0	0	0	0	0	0	0	0	1	0	0	0	4	0	0	0	0	0	0	0.044
[BMIM][BF4]	[BMIM]	[BF4]	298.15	3.9956	1	1	4	2	0	0	0	0	0	0	0	0	0	0	0	0	0	0	0	1	0	1	0	0	0	0	0	0	0	0	0	0	1	0	0	0	4	0	0	0	0	0	0	0.069
[BMIM][BF4]	[BMIM]	[BF4]	348.05	1.0018	1	1	4	2	0	0	0	0	0	0	0	0	0	0	0	0	0	0	0	1	0	1	0	0	0	0	0	0	0	0	0	0	1	0	0	0	4	0	0	0	0	0	0	0.007
[BMIM][BF4]	[BMIM]	[BF4]	323.15	1.0014	1	1	4	2	0	0	0	0	0	0	0	0	0	0	0	0	0	0	0	1	0	1	0	0	0	0	0	0	0	0	0	0	1	0	0	0	4	0	0	0	0	0	0	0.012
[BMIM][BF4]	[BMIM]	[BF4]	298.05	1.0013	1	1	4	2	0	0	0	0	0	0	0	0	0	0	0	0	0	0	0	1	0	1	0	0	0	0	0	0	0	0	0	0	1	0	0	0	4	0	0	0	0	0	0	0.019
[BMIM][BF4]	[BMIM]	[BF4]	283.05	1.001	1	1	4	2	0	0	0	0	0	0	0	0	0	0	0	0	0	0	0	1	0	1	0	0	0	0	0	0	0	0	0	0	1	0	0	0	4	0	0	0	0	0	0	0.026
[BMIM][BF4]	[BMIM]	[BF4]	282.95	0.5015	1	1	4	2	0	0	0	0	0	0	0	0	0	0	0	0	0	0	0	1	0	1	0	0	0	0	0	0	0	0	0	0	1	0	0	0	4	0	0	0	0	0	0	0.013
[BMIM][BF4]	[BMIM]	[BF4]	348.15	0.5013	1	1	4	2	0	0	0	0	0	0	0	0	0	0	0	0	0	0	0	1	0	1	0	0	0	0	0	0	0	0	0	0	1	0	0	0	4	0	0	0	0	0	0	0.003
[BMIM][BF4]	[BMIM]	[BF4]	323.15	0.5011	1	1	4	2	0	0	0	0	0	0	0	0	0	0	0	0	0	0	0	1	0	1	0	0	0	0	0	0	0	0	0	0	1	0	0	0	4	0	0	0	0	0	0	0.006
[BMIM][BF4]	[BMIM]	[BF4]	298.15	0.5002	1	1	4	2	0	0	0	0	0	0	0	0	0	0	0	0	0	0	0	1	0	1	0	0	0	0	0	0	0	0	0	0	1	0	0	0	4	0	0	0	0	0	0	0.01
[BMIM][BF4]	[BMIM]	[BF4]	348.15	0.102	1	1	4	2	0	0	0	0	0	0	0	0	0	0	0	0	0	0	0	1	0	1	0	0	0	0	0	0	0	0	0	0	1	0	0	0	4	0	0	0	0	0	0	0.002
[BMIM][BF4]	[BMIM]	[BF4]	282.75	0.1017	1	1	4	2	0	0	0	0	0	0	0	0	0	0	0	0	0	0	0	1	0	1	0	0	0	0	0	0	0	0	0	0	1	0	0	0	4	0	0	0	0	0	0	0.002
[BMIM][BF4]	[BMIM]	[BF4]	323.25	0.1015	1	1	4	2	0	0	0	0	0	0	0	0	0	0	0	0	0	0	0	1	0	1	0	0	0	0	0	0	0	0	0	0	1	0	0	0	4	0	0	0	0	0	0	0.003
[BMIM][BF4]	[BMIM]	[BF4]	297.95	0.0973	1	1	4	2	0	0	0	0	0	0	0	0	0	0	0	0	0	0	0	1	0	1	0	0	0	0	0	0	0	0	0	0	1	0	0	0	4	0	0	0	0	0	0	0.002
[BMIM][PF6]	[BMIM]	[PF6]	323.25	19.9978	1	1	4	2	0	0	0	0	0	0	0	0	0	0	0	0	0	0	0	1	0	0	0	0	1	0	0	0	0	0	0	0	1	0	0	0	6	0	0	0	0	0	0	0.197
[BMIM][PF6]	[BMIM]	[PF6]	283.05	19.9975	1	1	4	2	0	0	0	0	0	0	0	0	0	0	0	0	0	0	0	1	0	0	0	0	1	0	0	0	0	0	0	0	1	0	0	0	6	0	0	0	0	0	0	0.379
[BMIM][PF6]	[BMIM]	[PF6]	348.25	19.9951	1	1	4	2	0	0	0	0	0	0	0	0	0	0	0	0	0	0	0	1	0	0	0	0	1	0	0	0	0	0	0	0	1	0	0	0	6	0	0	0	0	0	0	0.149
[BMIM][PF6]	[BMIM]	[PF6]	298.05	19.9919	1	1	4	2	0	0	0	0	0	0	0	0	0	0	0	0	0	0	0	1	0	0	0	0	1	0	0	0	0	0	0	0	1	0	0	0	6	0	0	0	0	0	0	0.291
[BMIM][PF6]	[BMIM]	[PF6]	323.25	15.0027	1	1	4	2	0	0	0	0	0	0	0	0	0	0	0	0	0	0	0	1	0	0	0	0	1	0	0	0	0	0	0	0	1	0	0	0	6	0	0	0	0	0	0	0.155
[BMIM][PF6]	[BMIM]	[PF6]	348.05	14.9985	1	1	4	2	0	0	0	0	0	0	0	0	0	0	0	0	0	0	0	1	0	0	0	0	1	0	0	0	0	0	0	0	1	0	0	0	6	0	0	0	0	0	0	0.113
[BMIM][PF6]	[BMIM]	[PF6]	283.05	14.998	1	1	4	2	0	0	0	0	0	0	0	0	0	0	0	0	0	0	0	1	0	0	0	0	1	0	0	0	0	0	0	0	1	0	0	0	6	0	0	0	0	0	0	0.309
[BMIM][PF6]	[BMIM]	[PF6]	298.05	14.9942	1	1	4	2	0	0	0	0	0	0	0	0	0	0	0	0	0	0	0	1	0	0	0	0	1	0	0	0	0	0	0	0	1	0	0	0	6	0	0	0	0	0	0	0.233
[BMIM][PF6]	[BMIM]	[PF6]	348.15	13.0032	1	1	4	2	0	0	0	0	0	0	0	0	0	0	0	0	0	0	0	1	0	0	0	0	1	0	0	0	0	0	0	0	1	0	0	0	6	0	0	0	0	0	0	0.099
[BMIM][PF6]	[BMIM]	[PF6]	282.05	13.0027	1	1	4	2	0	0	0	0	0	0	0	0	0	0	0	0	0	0	0	1	0	0	0	0	1	0	0	0	0	0	0	0	1	0	0	0	6	0	0	0	0	0	0	0.284
[BMIM][PF6]	[BMIM]	[PF6]	323.15	13.0023	1	1	4	2	0	0	0	0	0	0	0	0	0	0	0	0	0	0	0	1	0	0	0	0	1	0	0	0	0	0	0	0	1	0	0	0	6	0	0	0	0	0	0	0.136
[BMIM][PF6]	[BMIM]	[PF6]	298.05	12.999	1	1	4	2	0	0	0	0	0	0	0	0	0	0	0	0	0	0	0	1	0	0	0	0	1	0	0	0	0	0	0	0	1	0	0	0	6	0	0	0	0	0	0	0.208
[BMIM][PF6]	[BMIM]	[PF6]	347.95	10.0023	1	1	4	2	0	0	0	0	0	0	0	0	0	0	0	0	0	0	0	1	0	0	0	0	1	0	0	0	0	0	0	0	1	0	0	0	6	0	0	0	0	0	0	0.078
[BMIM][PF6]	[BMIM]	[PF6]	283.65	9.9996	1	1	4	2	0	0	0	0	0	0	0	0	0	0	0	0	0	0	0	1	0	0	0	0	1	0	0	0	0	0	0	0	1	0	0	0	6	0	0	0	0	0	0	0.224
[BMIM][PF6]	[BMIM]	[PF6]	323.15	9.9979	1	1	4	2	0	0	0	0	0	0	0	0	0	0	0	0	0	0	0	1	0	0	0	0	1	0	0	0	0	0	0	0	1	0	0	0	6	0	0	0	0	0	0	0.109
[BMIM][PF6]	[BMIM]	[PF6]	298.05	9.9941	1	1	4	2	0	0	0	0	0	0	0	0	0	0	0	0	0	0	0	1	0	0	0	0	1	0	0	0	0	0	0	0	1	0	0	0	6	0	0	0	0	0	0	0.167
[BMIM][PF6]	[BMIM]	[PF6]	323.15	7.0004	1	1	4	2	0	0	0	0	0	0	0	0	0	0	0	0	0	0	0	1	0	0	0	0	1	0	0	0	0	0	0	0	1	0	0	0	6	0	0	0	0	0	0	0.079
[BMIM][PF6]	[BMIM]	[PF6]	348.05	7.0001	1	1	4	2	0	0	0	0	0	0	0	0	0	0	0	0	0	0	0	1	0	0	0	0	1	0	0	0	0	0	0	0	1	0	0	0	6	0	0	0	0	0	0	0.056
[BMIM][PF6]	[BMIM]	[PF6]	298.15	7	1	1	4	2	0	0	0	0	0	0	0	0	0	0	0	0	0	0	0	1	0	0	0	0	1	0	0	0	0	0	0	0	1	0	0	0	6	0	0	0	0	0	0	0.122
[BMIM][PF6]	[BMIM]	[PF6]	283.75	6.9959	1	1	4	2	0	0	0	0	0	0	0	0	0	0	0	0	0	0	0	1	0	0	0	0	1	0	0	0	0	0	0	0	1	0	0	0	6	0	0	0	0	0	0	0.167
[BMIM][PF6]	[BMIM]	[PF6]	348.05	3.9969	1	1	4	2	0	0	0	0	0	0	0	0	0	0	0	0	0	0	0	1	0	0	0	0	1	0	0	0	0	0	0	0	1	0	0	0	6	0	0	0	0	0	0	0.032
[BMIM][PF6]	[BMIM]	[PF6]	298.15	3.9963	1	1	4	2	0	0	0	0	0	0	0	0	0	0	0	0	0	0	0	1	0	0	0	0	1	0	0	0	0	0	0	0	1	0	0	0	6	0	0	0	0	0	0	0.072
[BMIM][PF6]	[BMIM]	[PF6]	323.25	3.9961	1	1	4	2	0	0	0	0	0	0	0	0	0	0	0	0	0	0	0	1	0	0	0	0	1	0	0	0	0	0	0	0	1	0	0	0	6	0	0	0	0	0	0	0.047
[BMIM][PF6]	[BMIM]	[PF6]	283.55	3.9956	1	1	4	2	0	0	0	0	0	0	0	0	0	0	0	0	0	0	0	1	0	0	0	0	1	0	0	0	0	0	0	0	1	0	0	0	6	0	0	0	0	0	0	0.102
[BMIM][PF6]	[BMIM]	[PF6]	298.05	1.002	1	1	4	2	0	0	0	0	0	0	0	0	0	0	0	0	0	0	0	1	0	0	0	0	1	0	0	0	0	0	0	0	1	0	0	0	6	0	0	0	0	0	0	0.018
[BMIM][PF6]	[BMIM]	[PF6]	323.15	1.002	1	1	4	2	0	0	0	0	0	0	0	0	0	0	0	0	0	0	0	1	0	0	0	0	1	0	0	0	0	0	0	0	1	0	0	0	6	0	0	0	0	0	0	0.012
[BMIM][PF6]	[BMIM]	[PF6]	283.05	1.0018	1	1	4	2	0	0	0	0	0	0	0	0	0	0	0	0	0	0	0	1	0	0	0	0	1	0	0	0	0	0	0	0	1	0	0	0	6	0	0	0	0	0	0	0.029
[BMIM][PF6]	[BMIM]	[PF6]	348.05	1.0003	1	1	4	2	0	0	0	0	0	0	0	0	0	0	0	0	0	0	0	1	0	0	0	0	1	0	0	0	0	0	0	0	1	0	0	0	6	0	0	0	0	0	0	0.007
[BMIM][PF6]	[BMIM]	[PF6]	323.15	0.5026	1	1	4	2	0	0	0	0	0	0	0	0	0	0	0	0	0	0	0	1	0	0	0	0	1	0	0	0	0	0	0	0	1	0	0	0	6	0	0	0	0	0	0	0.006
[BMIM][PF6]	[BMIM]	[PF6]	298.05	0.5015	1	1	4	2	0	0	0	0	0	0	0	0	0	0	0	0	0	0	0	1	0	0	0	0	1	0	0	0	0	0	0	0	1	0	0	0	6	0	0	0	0	0	0	0.009
[BMIM][PF6]	[BMIM]	[PF6]	283.05	0.5009	1	1	4	2	0	0	0	0	0	0	0	0	0	0	0	0	0	0	0	1	0	0	0	0	1	0	0	0	0	0	0	0	1	0	0	0	6	0	0	0	0	0	0	0.016
[BMIM][PF6]	[BMIM]	[PF6]	348.05	0.5008	1	1	4	2	0	0	0	0	0	0	0	0	0	0	0	0	0	0	0	1	0	0	0	0	1	0	0	0	0	0	0	0	1	0	0	0	6	0	0	0	0	0	0	0.002
[BMIM][PF6]	[BMIM]	[PF6]	348.15	0.1021	1	1	4	2	0	0	0	0	0	0	0	0	0	0	0	0	0	0	0	1	0	0	0	0	1	0	0	0	0	0	0	0	1	0	0	0	6	0	0	0	0	0	0	0.001
[BMIM][PF6]	[BMIM]	[PF6]	323.25	0.102	1	1	4	2	0	0	0	0	0	0	0	0	0	0	0	0	0	0	0	1	0	0	0	0	1	0	0	0	0	0	0	0	1	0	0	0	6	0	0	0	0	0	0	0.002
[BMIM][PF6]	[BMIM]	[PF6]	298.05	0.1015	1	1	4	2	0	0	0	0	0	0	0	0	0	0	0	0	0	0	0	1	0	0	0	0	1	0	0	0	0	0	0	0	1	0	0	0	6	0	0	0	0	0	0	0.001
[BMIM][PF6]	[BMIM]	[PF6]	283.05	0.0969	1	1	4	2	0	0	0	0	0	0	0	0	0	0	0	0	0	0	0	1	0	0	0	0	1	0	0	0	0	0	0	0	1	0	0	0	6	0	0	0	0	0	0	0.004
[BMIM][BF4]	[BMIM]	[BF4]	344.27	0.92	1	1	4	2	0	0	0	0	0	0	0	0	0	0	0	0	0	0	0	1	0	1	0	0	0	0	0	0	0	0	0	0	1	0	0	0	4	0	0	0	0	0	0	0.008101
[BMIM][BF4]	[BMIM]	[BF4]	342.96	0.91046	1	1	4	2	0	0	0	0	0	0	0	0	0	0	0	0	0	0	0	1	0	1	0	0	0	0	0	0	0	0	0	0	1	0	0	0	4	0	0	0	0	0	0	0.008173
[BMIM][BF4]	[BMIM]	[BF4]	334.15	0.89028	1	1	4	2	0	0	0	0	0	0	0	0	0	0	0	0	0	0	0	1	0	1	0	0	0	0	0	0	0	0	0	0	1	0	0	0	4	0	0	0	0	0	0	0.009546
[BMIM][BF4]	[BMIM]	[BF4]	324.06	0.86092	1	1	4	2	0	0	0	0	0	0	0	0	0	0	0	0	0	0	0	1	0	1	0	0	0	0	0	0	0	0	0	0	1	0	0	0	4	0	0	0	0	0	0	0.01104
[BMIM][BF4]	[BMIM]	[BF4]	323.19	0.84666	1	1	4	2	0	0	0	0	0	0	0	0	0	0	0	0	0	0	0	1	0	1	0	0	0	0	0	0	0	0	0	0	1	0	0	0	4	0	0	0	0	0	0	0.01126
[BMIM][BF4]	[BMIM]	[BF4]	324.18	0.8247	1	1	4	2	0	0	0	0	0	0	0	0	0	0	0	0	0	0	0	1	0	1	0	0	0	0	0	0	0	0	0	0	1	0	0	0	4	0	0	0	0	0	0	0.01104
[BMIM][BF4]	[BMIM]	[BF4]	313.99	0.79791	1	1	4	2	0	0	0	0	0	0	0	0	0	0	0	0	0	0	0	1	0	1	0	0	0	0	0	0	0	0	0	0	1	0	0	0	4	0	0	0	0	0	0	0.01332
[BMIM][BF4]	[BMIM]	[BF4]	303.38	0.77797	1	1	4	2	0	0	0	0	0	0	0	0	0	0	0	0	0	0	0	1	0	1	0	0	0	0	0	0	0	0	0	0	1	0	0	0	4	0	0	0	0	0	0	0.01623
[BMIM][BF4]	[BMIM]	[BF4]	303.9	0.76576	1	1	4	2	0	0	0	0	0	0	0	0	0	0	0	0	0	0	0	1	0	1	0	0	0	0	0	0	0	0	0	0	1	0	0	0	4	0	0	0	0	0	0	0.016
[BMIM][BF4]	[BMIM]	[BF4]	343.83	0.26387	1	1	4	2	0	0	0	0	0	0	0	0	0	0	0	0	0	0	0	1	0	1	0	0	0	0	0	0	0	0	0	0	1	0	0	0	4	0	0	0	0	0	0	0.007948
[BMIM][BF4]	[BMIM]	[BF4]	303.93	0.21588	1	1	4	2	0	0	0	0	0	0	0	0	0	0	0	0	0	0	0	1	0	1	0	0	0	0	0	0	0	0	0	0	1	0	0	0	4	0	0	0	0	0	0	0.01591
[BMIM][BF4]	[BMIM]	[BF4]	322.15	90	1	1	4	2	0	0	0	0	0	0	0	0	0	0	0	0	0	0	0	1	0	1	0	0	0	0	0	0	0	0	0	0	1	0	0	0	4	0	0	0	0	0	0	0.431633
[BMIM][BF4]	[BMIM]	[BF4]	317.45	86.2	1	1	4	2	0	0	0	0	0	0	0	0	0	0	0	0	0	0	0	1	0	1	0	0	0	0	0	0	0	0	0	0	1	0	0	0	4	0	0	0	0	0	0	0.444479
[BMIM][BF4]	[BMIM]	[BF4]	312.45	81.8	1	1	4	2	0	0	0	0	0	0	0	0	0	0	0	0	0	0	0	1	0	1	0	0	0	0	0	0	0	0	0	0	1	0	0	0	4	0	0	0	0	0	0	0.453401
[BMIM][BF4]	[BMIM]	[BF4]	322.15	81	1	1	4	2	0	0	0	0	0	0	0	0	0	0	0	0	0	0	0	1	0	1	0	0	0	0	0	0	0	0	0	0	1	0	0	0	4	0	0	0	0	0	0	0.410427
[BMIM][BF4]	[BMIM]	[BF4]	307.55	78.3	1	1	4	2	0	0	0	0	0	0	0	0	0	0	0	0	0	0	0	1	0	1	0	0	0	0	0	0	0	0	0	0	1	0	0	0	4	0	0	0	0	0	0	0.467223
[BMIM][BF4]	[BMIM]	[BF4]	317.45	77.5	1	1	4	2	0	0	0	0	0	0	0	0	0	0	0	0	0	0	0	1	0	1	0	0	0	0	0	0	0	0	0	0	1	0	0	0	4	0	0	0	0	0	0	0.421224
[BMIM][BF4]	[BMIM]	[BF4]	322.15	75.6	1	1	4	2	0	0	0	0	0	0	0	0	0	0	0	0	0	0	0	1	0	1	0	0	0	0	0	0	0	0	0	0	1	0	0	0	4	0	0	0	0	0	0	0.401656
[BMIM][BF4]	[BMIM]	[BF4]	312.45	73.5	1	1	4	2	0	0	0	0	0	0	0	0	0	0	0	0	0	0	0	1	0	1	0	0	0	0	0	0	0	0	0	0	1	0	0	0	4	0	0	0	0	0	0	0.436699
[BMIM][BF4]	[BMIM]	[BF4]	317.45	72.4	1	1	4	2	0	0	0	0	0	0	0	0	0	0	0	0	0	0	0	1	0	1	0	0	0	0	0	0	0	0	0	0	1	0	0	0	4	0	0	0	0	0	0	0.410427
[BMIM][BF4]	[BMIM]	[BF4]	307.55	69.8	1	1	4	2	0	0	0	0	0	0	0	0	0	0	0	0	0	0	0	1	0	1	0	0	0	0	0	0	0	0	0	0	1	0	0	0	4	0	0	0	0	0	0	0.448632
[BMIM][BF4]	[BMIM]	[BF4]	312.45	69.1	1	1	4	2	0	0	0	0	0	0	0	0	0	0	0	0	0	0	0	1	0	1	0	0	0	0	0	0	0	0	0	0	1	0	0	0	4	0	0	0	0	0	0	0.424237
[BMIM][BF4]	[BMIM]	[BF4]	322.15	67.2	1	1	4	2	0	0	0	0	0	0	0	0	0	0	0	0	0	0	0	1	0	1	0	0	0	0	0	0	0	0	0	0	1	0	0	0	4	0	0	0	0	0	0	0.372818
[BMIM][BF4]	[BMIM]	[BF4]	307.55	65.5	1	1	4	2	0	0	0	0	0	0	0	0	0	0	0	0	0	0	0	1	0	1	0	0	0	0	0	0	0	0	0	0	1	0	0	0	4	0	0	0	0	0	0	0.433815
[BMIM][BF4]	[BMIM]	[BF4]	317.45	63.9	1	1	4	2	0	0	0	0	0	0	0	0	0	0	0	0	0	0	0	1	0	1	0	0	0	0	0	0	0	0	0	0	1	0	0	0	4	0	0	0	0	0	0	0.385876
[BMIM][BF4]	[BMIM]	[BF4]	322.15	61.4	1	1	4	2	0	0	0	0	0	0	0	0	0	0	0	0	0	0	0	1	0	1	0	0	0	0	0	0	0	0	0	0	1	0	0	0	4	0	0	0	0	0	0	0.35733
[BMIM][BF4]	[BMIM]	[BF4]	312.45	61	1	1	4	2	0	0	0	0	0	0	0	0	0	0	0	0	0	0	0	1	0	1	0	0	0	0	0	0	0	0	0	0	1	0	0	0	4	0	0	0	0	0	0	0.399219
[BMIM][BF4]	[BMIM]	[BF4]	317.45	58.7	1	1	4	2	0	0	0	0	0	0	0	0	0	0	0	0	0	0	0	1	0	1	0	0	0	0	0	0	0	0	0	0	1	0	0	0	4	0	0	0	0	0	0	0.366532
[BMIM][BF4]	[BMIM]	[BF4]	307.55	57.7	1	1	4	2	0	0	0	0	0	0	0	0	0	0	0	0	0	0	0	1	0	1	0	0	0	0	0	0	0	0	0	0	1	0	0	0	4	0	0	0	0	0	0	0.40964
[BMIM][BF4]	[BMIM]	[BF4]	312.45	56.1	1	1	4	2	0	0	0	0	0	0	0	0	0	0	0	0	0	0	0	1	0	1	0	0	0	0	0	0	0	0	0	0	1	0	0	0	4	0	0	0	0	0	0	0.378107
[BMIM][BF4]	[BMIM]	[BF4]	307.55	53.3	1	1	4	2	0	0	0	0	0	0	0	0	0	0	0	0	0	0	0	1	0	1	0	0	0	0	0	0	0	0	0	0	1	0	0	0	4	0	0	0	0	0	0	0.386727
[BMIM][BF4]	[BMIM]	[BF4]	322.15	50.6	1	1	4	2	0	0	0	0	0	0	0	0	0	0	0	0	0	0	0	1	0	1	0	0	0	0	0	0	0	0	0	0	1	0	0	0	4	0	0	0	0	0	0	0.308083
[BMIM][BF4]	[BMIM]	[BF4]	317.45	48.3	1	1	4	2	0	0	0	0	0	0	0	0	0	0	0	0	0	0	0	1	0	1	0	0	0	0	0	0	0	0	0	0	1	0	0	0	4	0	0	0	0	0	0	0.329068
[BMIM][BF4]	[BMIM]	[BF4]	312.45	46.3	1	1	4	2	0	0	0	0	0	0	0	0	0	0	0	0	0	0	0	1	0	1	0	0	0	0	0	0	0	0	0	0	1	0	0	0	4	0	0	0	0	0	0	0.340076
[BMIM][BF4]	[BMIM]	[BF4]	322.15	46	1	1	4	2	0	0	0	0	0	0	0	0	0	0	0	0	0	0	0	1	0	1	0	0	0	0	0	0	0	0	0	0	1	0	0	0	4	0	0	0	0	0	0	0.290325
[BMIM][BF4]	[BMIM]	[BF4]	307.55	44	1	1	4	2	0	0	0	0	0	0	0	0	0	0	0	0	0	0	0	1	0	1	0	0	0	0	0	0	0	0	0	0	1	0	0	0	4	0	0	0	0	0	0	0.350729
[BMIM][BF4]	[BMIM]	[BF4]	317.45	44	1	1	4	2	0	0	0	0	0	0	0	0	0	0	0	0	0	0	0	1	0	1	0	0	0	0	0	0	0	0	0	0	1	0	0	0	4	0	0	0	0	0	0	0.308083
[BMIM][BF4]	[BMIM]	[BF4]	312.45	42	1	1	4	2	0	0	0	0	0	0	0	0	0	0	0	0	0	0	0	1	0	1	0	0	0	0	0	0	0	0	0	0	1	0	0	0	4	0	0	0	0	0	0	0.319784
[BMIM][BF4]	[BMIM]	[BF4]	322.15	40.5	1	1	4	2	0	0	0	0	0	0	0	0	0	0	0	0	0	0	0	1	0	1	0	0	0	0	0	0	0	0	0	0	1	0	0	0	4	0	0	0	0	0	0	0.269226
[BMIM][BF4]	[BMIM]	[BF4]	307.55	40	1	1	4	2	0	0	0	0	0	0	0	0	0	0	0	0	0	0	0	1	0	1	0	0	0	0	0	0	0	0	0	0	1	0	0	0	4	0	0	0	0	0	0	0.329068
[BMIM][BF4]	[BMIM]	[BF4]	317.45	38.4	1	1	4	2	0	0	0	0	0	0	0	0	0	0	0	0	0	0	0	1	0	1	0	0	0	0	0	0	0	0	0	0	1	0	0	0	4	0	0	0	0	0	0	0.284588
[BMIM][BF4]	[BMIM]	[BF4]	312.45	36.3	1	1	4	2	0	0	0	0	0	0	0	0	0	0	0	0	0	0	0	1	0	1	0	0	0	0	0	0	0	0	0	0	1	0	0	0	4	0	0	0	0	0	0	0.293724
[BMIM][BF4]	[BMIM]	[BF4]	307.55	34.3	1	1	4	2	0	0	0	0	0	0	0	0	0	0	0	0	0	0	0	1	0	1	0	0	0	0	0	0	0	0	0	0	1	0	0	0	4	0	0	0	0	0	0	0.299316
[BMIM][BF4]	[BMIM]	[BF4]	322.15	32.5	1	1	4	2	0	0	0	0	0	0	0	0	0	0	0	0	0	0	0	1	0	1	0	0	0	0	0	0	0	0	0	0	1	0	0	0	4	0	0	0	0	0	0	0.228446
[BMIM][BF4]	[BMIM]	[BF4]	317.45	30.8	1	1	4	2	0	0	0	0	0	0	0	0	0	0	0	0	0	0	0	1	0	1	0	0	0	0	0	0	0	0	0	0	1	0	0	0	4	0	0	0	0	0	0	0.236436
[BMIM][BF4]	[BMIM]	[BF4]	312.45	29.1	1	1	4	2	0	0	0	0	0	0	0	0	0	0	0	0	0	0	0	1	0	1	0	0	0	0	0	0	0	0	0	0	1	0	0	0	4	0	0	0	0	0	0	0.24939
[BMIM][BF4]	[BMIM]	[BF4]	307.55	27.4	1	1	4	2	0	0	0	0	0	0	0	0	0	0	0	0	0	0	0	1	0	1	0	0	0	0	0	0	0	0	0	0	1	0	0	0	4	0	0	0	0	0	0	0.259441
[BMIM][BF4]	[BMIM]	[BF4]	322.15	20.8	1	1	4	2	0	0	0	0	0	0	0	0	0	0	0	0	0	0	0	1	0	1	0	0	0	0	0	0	0	0	0	0	1	0	0	0	4	0	0	0	0	0	0	0.1659
[BMIM][BF4]	[BMIM]	[BF4]	317.45	19.7	1	1	4	2	0	0	0	0	0	0	0	0	0	0	0	0	0	0	0	1	0	1	0	0	0	0	0	0	0	0	0	0	1	0	0	0	4	0	0	0	0	0	0	0.170591
[BMIM][BF4]	[BMIM]	[BF4]	312.45	18.5	1	1	4	2	0	0	0	0	0	0	0	0	0	0	0	0	0	0	0	1	0	1	0	0	0	0	0	0	0	0	0	0	1	0	0	0	4	0	0	0	0	0	0	0.173689
[BMIM][BF4]	[BMIM]	[BF4]	307.55	17.5	1	1	4	2	0	0	0	0	0	0	0	0	0	0	0	0	0	0	0	1	0	1	0	0	0	0	0	0	0	0	0	0	1	0	0	0	4	0	0	0	0	0	0	0.182846
[HMIM][BF4]	[HMIM]	[BF4]	322.15	86.4	1	1	6	2	0	0	0	0	0	0	0	0	0	0	0	0	0	0	0	1	0	1	0	0	0	0	0	0	0	0	0	0	1	0	0	0	4	0	0	0	0	0	0	0.458087
[HMIM][BF4]	[HMIM]	[BF4]	317.45	82.3	1	1	6	2	0	0	0	0	0	0	0	0	0	0	0	0	0	0	0	1	0	1	0	0	0	0	0	0	0	0	0	0	1	0	0	0	4	0	0	0	0	0	0	0.476056
[HMIM][BF4]	[HMIM]	[BF4]	322.15	79.2	1	1	6	2	0	0	0	0	0	0	0	0	0	0	0	0	0	0	0	1	0	1	0	0	0	0	0	0	0	0	0	0	1	0	0	0	4	0	0	0	0	0	0	0.436699
[HMIM][BF4]	[HMIM]	[BF4]	312.45	78.3	1	1	6	2	0	0	0	0	0	0	0	0	0	0	0	0	0	0	0	1	0	1	0	0	0	0	0	0	0	0	0	0	1	0	0	0	4	0	0	0	0	0	0	0.489948
[HMIM][BF4]	[HMIM]	[BF4]	322.15	77	1	1	6	2	0	0	0	0	0	0	0	0	0	0	0	0	0	0	0	1	0	1	0	0	0	0	0	0	0	0	0	0	1	0	0	0	4	0	0	0	0	0	0	0.433815
[HMIM][BF4]	[HMIM]	[BF4]	317.45	75.4	1	1	6	2	0	0	0	0	0	0	0	0	0	0	0	0	0	0	0	1	0	1	0	0	0	0	0	0	0	0	0	0	1	0	0	0	4	0	0	0	0	0	0	0.448632
[HMIM][BF4]	[HMIM]	[BF4]	322.15	74.7	1	1	6	2	0	0	0	0	0	0	0	0	0	0	0	0	0	0	0	1	0	1	0	0	0	0	0	0	0	0	0	0	1	0	0	0	4	0	0	0	0	0	0	0.424237
[HMIM][BF4]	[HMIM]	[BF4]	307.55	74.1	1	1	6	2	0	0	0	0	0	0	0	0	0	0	0	0	0	0	0	1	0	1	0	0	0	0	0	0	0	0	0	0	1	0	0	0	4	0	0	0	0	0	0	0.505345
[HMIM][BF4]	[HMIM]	[BF4]	317.45	73.2	1	1	6	2	0	0	0	0	0	0	0	0	0	0	0	0	0	0	0	1	0	1	0	0	0	0	0	0	0	0	0	0	1	0	0	0	4	0	0	0	0	0	0	0.445175
[HMIM][BF4]	[HMIM]	[BF4]	312.45	71.1	1	1	6	2	0	0	0	0	0	0	0	0	0	0	0	0	0	0	0	1	0	1	0	0	0	0	0	0	0	0	0	0	1	0	0	0	4	0	0	0	0	0	0	0.465291
[HMIM][BF4]	[HMIM]	[BF4]	317.45	70.8	1	1	6	2	0	0	0	0	0	0	0	0	0	0	0	0	0	0	0	1	0	1	0	0	0	0	0	0	0	0	0	0	1	0	0	0	4	0	0	0	0	0	0	0.437415
[HMIM][BF4]	[HMIM]	[BF4]	312.45	69.3	1	1	6	2	0	0	0	0	0	0	0	0	0	0	0	0	0	0	0	1	0	1	0	0	0	0	0	0	0	0	0	0	1	0	0	0	4	0	0	0	0	0	0	0.460729
[HMIM][BF4]	[HMIM]	[BF4]	322.15	67.2	1	1	6	2	0	0	0	0	0	0	0	0	0	0	0	0	0	0	0	1	0	1	0	0	0	0	0	0	0	0	0	0	1	0	0	0	4	0	0	0	0	0	0	0.405675
[HMIM][BF4]	[HMIM]	[BF4]	307.55	67	1	1	6	2	0	0	0	0	0	0	0	0	0	0	0	0	0	0	0	1	0	1	0	0	0	0	0	0	0	0	0	0	1	0	0	0	4	0	0	0	0	0	0	0.477294
[HMIM][BF4]	[HMIM]	[BF4]	312.45	67	1	1	6	2	0	0	0	0	0	0	0	0	0	0	0	0	0	0	0	1	0	1	0	0	0	0	0	0	0	0	0	0	1	0	0	0	4	0	0	0	0	0	0	0.454075
[HMIM][BF4]	[HMIM]	[BF4]	307.55	65.2	1	1	6	2	0	0	0	0	0	0	0	0	0	0	0	0	0	0	0	1	0	1	0	0	0	0	0	0	0	0	0	0	1	0	0	0	4	0	0	0	0	0	0	0.463346
[HMIM][BF4]	[HMIM]	[BF4]	317.45	63.9	1	1	6	2	0	0	0	0	0	0	0	0	0	0	0	0	0	0	0	1	0	1	0	0	0	0	0	0	0	0	0	0	1	0	0	0	4	0	0	0	0	0	0	0.420466
[HMIM][BF4]	[HMIM]	[BF4]	307.55	63.2	1	1	6	2	0	0	0	0	0	0	0	0	0	0	0	0	0	0	0	1	0	1	0	0	0	0	0	0	0	0	0	0	1	0	0	0	4	0	0	0	0	0	0	0.44378
[HMIM][BF4]	[HMIM]	[BF4]	322.15	61.5	1	1	6	2	0	0	0	0	0	0	0	0	0	0	0	0	0	0	0	1	0	1	0	0	0	0	0	0	0	0	0	0	1	0	0	0	4	0	0	0	0	0	0	0.380718
[HMIM][BF4]	[HMIM]	[BF4]	312.45	60.5	1	1	6	2	0	0	0	0	0	0	0	0	0	0	0	0	0	0	0	1	0	1	0	0	0	0	0	0	0	0	0	0	1	0	0	0	4	0	0	0	0	0	0	0.430902
[HMIM][BF4]	[HMIM]	[BF4]	317.45	58.5	1	1	6	2	0	0	0	0	0	0	0	0	0	0	0	0	0	0	0	1	0	1	0	0	0	0	0	0	0	0	0	0	1	0	0	0	4	0	0	0	0	0	0	0.390948
[HMIM][BF4]	[HMIM]	[BF4]	307.55	57.1	1	1	6	2	0	0	0	0	0	0	0	0	0	0	0	0	0	0	0	1	0	1	0	0	0	0	0	0	0	0	0	0	1	0	0	0	4	0	0	0	0	0	0	0.415103
[HMIM][BF4]	[HMIM]	[BF4]	322.15	56.3	1	1	6	2	0	0	0	0	0	0	0	0	0	0	0	0	0	0	0	1	0	1	0	0	0	0	0	0	0	0	0	0	1	0	0	0	4	0	0	0	0	0	0	0.362883
[HMIM][BF4]	[HMIM]	[BF4]	312.45	55.4	1	1	6	2	0	0	0	0	0	0	0	0	0	0	0	0	0	0	0	1	0	1	0	0	0	0	0	0	0	0	0	0	1	0	0	0	4	0	0	0	0	0	0	0.404875
[HMIM][BF4]	[HMIM]	[BF4]	317.45	53.6	1	1	6	2	0	0	0	0	0	0	0	0	0	0	0	0	0	0	0	1	0	1	0	0	0	0	0	0	0	0	0	0	1	0	0	0	4	0	0	0	0	0	0	0.371927
[HMIM][BF4]	[HMIM]	[BF4]	307.55	52.2	1	1	6	2	0	0	0	0	0	0	0	0	0	0	0	0	0	0	0	1	0	1	0	0	0	0	0	0	0	0	0	0	1	0	0	0	4	0	0	0	0	0	0	0.395938
[HMIM][BF4]	[HMIM]	[BF4]	312.45	50.7	1	1	6	2	0	0	0	0	0	0	0	0	0	0	0	0	0	0	0	1	0	1	0	0	0	0	0	0	0	0	0	0	1	0	0	0	4	0	0	0	0	0	0	0.385876
[HMIM][BF4]	[HMIM]	[BF4]	322.15	48.9	1	1	6	2	0	0	0	0	0	0	0	0	0	0	0	0	0	0	0	1	0	1	0	0	0	0	0	0	0	0	0	0	1	0	0	0	4	0	0	0	0	0	0	0.322907
[HMIM][BF4]	[HMIM]	[BF4]	307.55	47.9	1	1	6	2	0	0	0	0	0	0	0	0	0	0	0	0	0	0	0	1	0	1	0	0	0	0	0	0	0	0	0	0	1	0	0	0	4	0	0	0	0	0	0	0.361043
[HMIM][BF4]	[HMIM]	[BF4]	317.45	46.4	1	1	6	2	0	0	0	0	0	0	0	0	0	0	0	0	0	0	0	1	0	1	0	0	0	0	0	0	0	0	0	0	1	0	0	0	4	0	0	0	0	0	0	0.336115
[HMIM][BF4]	[HMIM]	[BF4]	312.45	43.9	1	1	6	2	0	0	0	0	0	0	0	0	0	0	0	0	0	0	0	1	0	1	0	0	0	0	0	0	0	0	0	0	1	0	0	0	4	0	0	0	0	0	0	0.352629
[HMIM][BF4]	[HMIM]	[BF4]	322.15	43.1	1	1	6	2	0	0	0	0	0	0	0	0	0	0	0	0	0	0	0	1	0	1	0	0	0	0	0	0	0	0	0	0	1	0	0	0	4	0	0	0	0	0	0	0.31024
[HMIM][BF4]	[HMIM]	[BF4]	307.55	41.5	1	1	6	2	0	0	0	0	0	0	0	0	0	0	0	0	0	0	0	1	0	1	0	0	0	0	0	0	0	0	0	0	1	0	0	0	4	0	0	0	0	0	0	0.33909
[HMIM][BF4]	[HMIM]	[BF4]	317.45	41	1	1	6	2	0	0	0	0	0	0	0	0	0	0	0	0	0	0	0	1	0	1	0	0	0	0	0	0	0	0	0	0	1	0	0	0	4	0	0	0	0	0	0	0.318737
[HMIM][BF4]	[HMIM]	[BF4]	312.45	38.7	1	1	6	2	0	0	0	0	0	0	0	0	0	0	0	0	0	0	0	1	0	1	0	0	0	0	0	0	0	0	0	0	1	0	0	0	4	0	0	0	0	0	0	0.336115
[HMIM][BF4]	[HMIM]	[BF4]	322.15	36.6	1	1	6	2	0	0	0	0	0	0	0	0	0	0	0	0	0	0	0	1	0	1	0	0	0	0	0	0	0	0	0	0	1	0	0	0	4	0	0	0	0	0	0	0.274023
[HMIM][BF4]	[HMIM]	[BF4]	307.55	36.4	1	1	6	2	0	0	0	0	0	0	0	0	0	0	0	0	0	0	0	1	0	1	0	0	0	0	0	0	0	0	0	0	1	0	0	0	4	0	0	0	0	0	0	0.304821
[HMIM][BF4]	[HMIM]	[BF4]	317.45	34.5	1	1	6	2	0	0	0	0	0	0	0	0	0	0	0	0	0	0	0	1	0	1	0	0	0	0	0	0	0	0	0	0	1	0	0	0	4	0	0	0	0	0	0	0.284588
[HMIM][BF4]	[HMIM]	[BF4]	312.45	32.7	1	1	6	2	0	0	0	0	0	0	0	0	0	0	0	0	0	0	0	1	0	1	0	0	0	0	0	0	0	0	0	0	1	0	0	0	4	0	0	0	0	0	0	0.300424
[HMIM][BF4]	[HMIM]	[BF4]	307.55	30.8	1	1	6	2	0	0	0	0	0	0	0	0	0	0	0	0	0	0	0	1	0	1	0	0	0	0	0	0	0	0	0	0	1	0	0	0	4	0	0	0	0	0	0	0.231128
[HMIM][BF4]	[HMIM]	[BF4]	322.15	25.3	1	1	6	2	0	0	0	0	0	0	0	0	0	0	0	0	0	0	0	1	0	1	0	0	0	0	0	0	0	0	0	0	1	0	0	0	4	0	0	0	0	0	0	0.202006
[HMIM][BF4]	[HMIM]	[BF4]	317.45	24	1	1	6	2	0	0	0	0	0	0	0	0	0	0	0	0	0	0	0	1	0	1	0	0	0	0	0	0	0	0	0	0	1	0	0	0	4	0	0	0	0	0	0	0.207722
[HMIM][BF4]	[HMIM]	[BF4]	312.45	22.6	1	1	6	2	0	0	0	0	0	0	0	0	0	0	0	0	0	0	0	1	0	1	0	0	0	0	0	0	0	0	0	0	1	0	0	0	4	0	0	0	0	0	0	0.216144
[HMIM][BF4]	[HMIM]	[BF4]	307.55	21.3	1	1	6	2	0	0	0	0	0	0	0	0	0	0	0	0	0	0	0	1	0	1	0	0	0	0	0	0	0	0	0	0	1	0	0	0	4	0	0	0	0	0	0	0.477294
[OMIM][BF4]	[OMIM]	[BF4]	322.15	87.2	1	1	8	2	0	0	0	0	0	0	0	0	0	0	0	0	0	0	0	1	0	1	0	0	0	0	0	0	0	0	0	0	1	0	0	0	4	0	0	0	0	0	0	0.47914
[OMIM][BF4]	[OMIM]	[BF4]	322.15	87	1	1	8	2	0	0	0	0	0	0	0	0	0	0	0	0	0	0	0	1	0	1	0	0	0	0	0	0	0	0	0	0	1	0	0	0	4	0	0	0	0	0	0	0.465937
[OMIM][BF4]	[OMIM]	[BF4]	317.45	82.7	1	1	8	2	0	0	0	0	0	0	0	0	0	0	0	0	0	0	0	1	0	1	0	0	0	0	0	0	0	0	0	0	1	0	0	0	4	0	0	0	0	0	0	0.497479
[OMIM][BF4]	[OMIM]	[BF4]	317.45	82.5	1	1	8	2	0	0	0	0	0	0	0	0	0	0	0	0	0	0	0	1	0	1	0	0	0	0	0	0	0	0	0	0	1	0	0	0	4	0	0	0	0	0	0	0.492871
[OMIM][BF4]	[OMIM]	[BF4]	322.15	81.7	1	1	8	2	0	0	0	0	0	0	0	0	0	0	0	0	0	0	0	1	0	1	0	0	0	0	0	0	0	0	0	0	1	0	0	0	4	0	0	0	0	0	0	0.438129
[OMIM][BF4]	[OMIM]	[BF4]	312.45	78.2	1	1	8	2	0	0	0	0	0	0	0	0	0	0	0	0	0	0	0	1	0	1	0	0	0	0	0	0	0	0	0	0	1	0	0	0	4	0	0	0	0	0	0	0.506448
[OMIM][BF4]	[OMIM]	[BF4]	312.45	77.7	1	1	8	2	0	0	0	0	0	0	0	0	0	0	0	0	0	0	0	1	0	1	0	0	0	0	0	0	0	0	0	0	1	0	0	0	4	0	0	0	0	0	0	0.505897
[OMIM][BF4]	[OMIM]	[BF4]	317.45	77.7	1	1	8	2	0	0	0	0	0	0	0	0	0	0	0	0	0	0	0	1	0	1	0	0	0	0	0	0	0	0	0	0	1	0	0	0	4	0	0	0	0	0	0	0.476056
[OMIM][BF4]	[OMIM]	[BF4]	322.15	75.1	1	1	8	2	0	0	0	0	0	0	0	0	0	0	0	0	0	0	0	1	0	1	0	0	0	0	0	0	0	0	0	0	1	0	0	0	4	0	0	0	0	0	0	0.427218
[OMIM][BF4]	[OMIM]	[BF4]	307.55	73.9	1	1	8	2	0	0	0	0	0	0	0	0	0	0	0	0	0	0	0	1	0	1	0	0	0	0	0	0	0	0	0	0	1	0	0	0	4	0	0	0	0	0	0	0.515103
[OMIM][BF4]	[OMIM]	[BF4]	307.55	73.5	1	1	8	2	0	0	0	0	0	0	0	0	0	0	0	0	0	0	0	1	0	1	0	0	0	0	0	0	0	0	0	0	1	0	0	0	4	0	0	0	0	0	0	0.511354
[OMIM][BF4]	[OMIM]	[BF4]	312.45	73.5	1	1	8	2	0	0	0	0	0	0	0	0	0	0	0	0	0	0	0	1	0	1	0	0	0	0	0	0	0	0	0	0	1	0	0	0	4	0	0	0	0	0	0	0.483397
[OMIM][BF4]	[OMIM]	[BF4]	317.45	71.4	1	1	8	2	0	0	0	0	0	0	0	0	0	0	0	0	0	0	0	1	0	1	0	0	0	0	0	0	0	0	0	0	1	0	0	0	4	0	0	0	0	0	0	0.453401
[OMIM][BF4]	[OMIM]	[BF4]	307.55	69.2	1	1	8	2	0	0	0	0	0	0	0	0	0	0	0	0	0	0	0	1	0	1	0	0	0	0	0	0	0	0	0	0	1	0	0	0	4	0	0	0	0	0	0	0.500317
[OMIM][BF4]	[OMIM]	[BF4]	312.45	67.4	1	1	8	2	0	0	0	0	0	0	0	0	0	0	0	0	0	0	0	1	0	1	0	0	0	0	0	0	0	0	0	0	1	0	0	0	4	0	0	0	0	0	0	0.462694
[OMIM][BF4]	[OMIM]	[BF4]	317.45	66	1	1	8	2	0	0	0	0	0	0	0	0	0	0	0	0	0	0	0	1	0	1	0	0	0	0	0	0	0	0	0	0	1	0	0	0	4	0	0	0	0	0	0	0.436699
[OMIM][BF4]	[OMIM]	[BF4]	307.55	63.5	1	1	8	2	0	0	0	0	0	0	0	0	0	0	0	0	0	0	0	1	0	1	0	0	0	0	0	0	0	0	0	0	1	0	0	0	4	0	0	0	0	0	0	0.481581
[OMIM][BF4]	[OMIM]	[BF4]	322.15	63.4	1	1	8	2	0	0	0	0	0	0	0	0	0	0	0	0	0	0	0	1	0	1	0	0	0	0	0	0	0	0	0	0	1	0	0	0	4	0	0	0	0	0	0	0.400033
[OMIM][BF4]	[OMIM]	[BF4]	312.45	62.4	1	1	8	2	0	0	0	0	0	0	0	0	0	0	0	0	0	0	0	1	0	1	0	0	0	0	0	0	0	0	0	0	1	0	0	0	4	0	0	0	0	0	0	0.447255
[OMIM][BF4]	[OMIM]	[BF4]	317.45	60.2	1	1	8	2	0	0	0	0	0	0	0	0	0	0	0	0	0	0	0	1	0	1	0	0	0	0	0	0	0	0	0	0	1	0	0	0	4	0	0	0	0	0	0	0.416645
[OMIM][BF4]	[OMIM]	[BF4]	307.55	59.1	1	1	8	2	0	0	0	0	0	0	0	0	0	0	0	0	0	0	0	1	0	1	0	0	0	0	0	0	0	0	0	0	1	0	0	0	4	0	0	0	0	0	0	0.461386
[OMIM][BF4]	[OMIM]	[BF4]	312.45	57	1	1	8	2	0	0	0	0	0	0	0	0	0	0	0	0	0	0	0	1	0	1	0	0	0	0	0	0	0	0	0	0	1	0	0	0	4	0	0	0	0	0	0	0.424237
[OMIM][BF4]	[OMIM]	[BF4]	322.15	56.1	1	1	8	2	0	0	0	0	0	0	0	0	0	0	0	0	0	0	0	1	0	1	0	0	0	0	0	0	0	0	0	0	1	0	0	0	4	0	0	0	0	0	0	0.372818
[OMIM][BF4]	[OMIM]	[BF4]	307.55	53.8	1	1	8	2	0	0	0	0	0	0	0	0	0	0	0	0	0	0	0	1	0	1	0	0	0	0	0	0	0	0	0	0	1	0	0	0	4	0	0	0	0	0	0	0.436699
[OMIM][BF4]	[OMIM]	[BF4]	317.45	53.3	1	1	8	2	0	0	0	0	0	0	0	0	0	0	0	0	0	0	0	1	0	1	0	0	0	0	0	0	0	0	0	0	1	0	0	0	4	0	0	0	0	0	0	0.387576
[OMIM][BF4]	[OMIM]	[BF4]	312.45	50.5	1	1	8	2	0	0	0	0	0	0	0	0	0	0	0	0	0	0	0	1	0	1	0	0	0	0	0	0	0	0	0	0	1	0	0	0	4	0	0	0	0	0	0	0.395112
[OMIM][BF4]	[OMIM]	[BF4]	322.15	49	1	1	8	2	0	0	0	0	0	0	0	0	0	0	0	0	0	0	0	1	0	1	0	0	0	0	0	0	0	0	0	0	1	0	0	0	4	0	0	0	0	0	0	0.347858
[OMIM][BF4]	[OMIM]	[BF4]	307.55	47.7	1	1	8	2	0	0	0	0	0	0	0	0	0	0	0	0	0	0	0	1	0	1	0	0	0	0	0	0	0	0	0	0	1	0	0	0	4	0	0	0	0	0	0	0.40964
[OMIM][BF4]	[OMIM]	[BF4]	317.45	46.6	1	1	8	2	0	0	0	0	0	0	0	0	0	0	0	0	0	0	0	1	0	1	0	0	0	0	0	0	0	0	0	0	1	0	0	0	4	0	0	0	0	0	0	0.480363
[OMIM][BF4]	[OMIM]	[BF4]	312.45	44.1	1	1	8	2	0	0	0	0	0	0	0	0	0	0	0	0	0	0	0	1	0	1	0	0	0	0	0	0	0	0	0	0	1	0	0	0	4	0	0	0	0	0	0	0.372818
[OMIM][BF4]	[OMIM]	[BF4]	307.55	41.7	1	1	8	2	0	0	0	0	0	0	0	0	0	0	0	0	0	0	0	1	0	1	0	0	0	0	0	0	0	0	0	0	1	0	0	0	4	0	0	0	0	0	0	0.383308
[BMIM][BF4]	[BMIM]	[BF4]	298.1	20.002	1	1	4	2	0	0	0	0	0	0	0	0	0	0	0	0	0	0	0	1	0	1	0	0	0	0	0	0	0	0	0	0	1	0	0	0	4	0	0	0	0	0	0	0.277
[BMIM][BF4]	[BMIM]	[BF4]	298	15.001	1	1	4	2	0	0	0	0	0	0	0	0	0	0	0	0	0	0	0	1	0	1	0	0	0	0	0	0	0	0	0	0	1	0	0	0	4	0	0	0	0	0	0	0.221
[BMIM][BF4]	[BMIM]	[BF4]	298.2	13.002	1	1	4	2	0	0	0	0	0	0	0	0	0	0	0	0	0	0	0	1	0	1	0	0	0	0	0	0	0	0	0	0	1	0	0	0	4	0	0	0	0	0	0	0.197
[BMIM][BF4]	[BMIM]	[BF4]	298	9.997	1	1	4	2	0	0	0	0	0	0	0	0	0	0	0	0	0	0	0	1	0	1	0	0	0	0	0	0	0	0	0	0	1	0	0	0	4	0	0	0	0	0	0	0.158
[BMIM][BF4]	[BMIM]	[BF4]	298.2	7.002	1	1	4	2	0	0	0	0	0	0	0	0	0	0	0	0	0	0	0	1	0	1	0	0	0	0	0	0	0	0	0	0	1	0	0	0	4	0	0	0	0	0	0	0.115
[BMIM][BF4]	[BMIM]	[BF4]	298.2	3.996	1	1	4	2	0	0	0	0	0	0	0	0	0	0	0	0	0	0	0	1	0	1	0	0	0	0	0	0	0	0	0	0	1	0	0	0	4	0	0	0	0	0	0	0.069
[BMIM][BF4]	[BMIM]	[BF4]	298.1	1.001	1	1	4	2	0	0	0	0	0	0	0	0	0	0	0	0	0	0	0	1	0	1	0	0	0	0	0	0	0	0	0	0	1	0	0	0	4	0	0	0	0	0	0	0.019
[BMIM][BF4]	[BMIM]	[BF4]	298.2	0.5	1	1	4	2	0	0	0	0	0	0	0	0	0	0	0	0	0	0	0	1	0	1	0	0	0	0	0	0	0	0	0	0	1	0	0	0	4	0	0	0	0	0	0	0.01
[BMIM][BF4]	[BMIM]	[BF4]	298.2	0.1	1	1	4	2	0	0	0	0	0	0	0	0	0	0	0	0	0	0	0	1	0	1	0	0	0	0	0	0	0	0	0	0	1	0	0	0	4	0	0	0	0	0	0	0.001
[P4,4,4,4][FOR]	[P4,4,4,4]	[FOR]	298.1	19.996	0	4	4	4	0	0	0	0	0	0	0	0	0	0	0	1	0	0	0	0	0	0	0	0	0	0	0	0	0	1	0	0	0	0	0	1	0	0	0	0	0	0	0	0.348
[P4,4,4,4][FOR]	[P4,4,4,4]	[FOR]	298.1	12.997	0	4	4	4	0	0	0	0	0	0	0	0	0	0	0	1	0	0	0	0	0	0	0	0	0	0	0	0	0	1	0	0	0	0	0	1	0	0	0	0	0	0	0	0.251
[P4,4,4,4][FOR]	[P4,4,4,4]	[FOR]	298.2	9.999	0	4	4	4	0	0	0	0	0	0	0	0	0	0	0	1	0	0	0	0	0	0	0	0	0	0	0	0	0	1	0	0	0	0	0	1	0	0	0	0	0	0	0	0.203
[P4,4,4,4][FOR]	[P4,4,4,4]	[FOR]	298.1	7.004	0	4	4	4	0	0	0	0	0	0	0	0	0	0	0	1	0	0	0	0	0	0	0	0	0	0	0	0	0	1	0	0	0	0	0	1	0	0	0	0	0	0	0	0.151
[P4,4,4,4][FOR]	[P4,4,4,4]	[FOR]	298.1	1.004	0	4	4	4	0	0	0	0	0	0	0	0	0	0	0	1	0	0	0	0	0	0	0	0	0	0	0	0	0	1	0	0	0	0	0	1	0	0	0	0	0	0	0	0.034
[P4,4,4,4][FOR]	[P4,4,4,4]	[FOR]	298.2	0.502	0	4	4	4	0	0	0	0	0	0	0	0	0	0	0	1	0	0	0	0	0	0	0	0	0	0	0	0	0	1	0	0	0	0	0	1	0	0	0	0	0	0	0	0.024
[P4,4,4,4][FOR]	[P4,4,4,4]	[FOR]	298	0.1	0	4	4	4	0	0	0	0	0	0	0	0	0	0	0	1	0	0	0	0	0	0	0	0	0	0	0	0	0	1	0	0	0	0	0	1	0	0	0	0	0	0	0	0.008
[BMIM][PF6]	[BMIM]	[PF6]	298.1	19.997	1	1	4	2	0	0	0	0	0	0	0	0	0	0	0	0	0	0	0	1	0	0	0	0	1	0	0	0	0	0	0	0	1	0	0	0	6	0	0	0	0	0	0	0.286
[BMIM][PF6]	[BMIM]	[PF6]	298.1	15.003	1	1	4	2	0	0	0	0	0	0	0	0	0	0	0	0	0	0	0	1	0	0	0	0	1	0	0	0	0	0	0	0	1	0	0	0	6	0	0	0	0	0	0	0.229
[BMIM][PF6]	[BMIM]	[PF6]	298.1	12.996	1	1	4	2	0	0	0	0	0	0	0	0	0	0	0	0	0	0	0	1	0	0	0	0	1	0	0	0	0	0	0	0	1	0	0	0	6	0	0	0	0	0	0	0.202
[BMIM][PF6]	[BMIM]	[PF6]	298.1	9.997	1	1	4	2	0	0	0	0	0	0	0	0	0	0	0	0	0	0	0	1	0	0	0	0	1	0	0	0	0	0	0	0	1	0	0	0	6	0	0	0	0	0	0	0.161
[BMIM][PF6]	[BMIM]	[PF6]	298	7.003	1	1	4	2	0	0	0	0	0	0	0	0	0	0	0	0	0	0	0	1	0	0	0	0	1	0	0	0	0	0	0	0	1	0	0	0	6	0	0	0	0	0	0	0.118
[BMIM][PF6]	[BMIM]	[PF6]	298	3.998	1	1	4	2	0	0	0	0	0	0	0	0	0	0	0	0	0	0	0	1	0	0	0	0	1	0	0	0	0	0	0	0	1	0	0	0	6	0	0	0	0	0	0	0.07
[BMIM][PF6]	[BMIM]	[PF6]	298.2	1.004	1	1	4	2	0	0	0	0	0	0	0	0	0	0	0	0	0	0	0	1	0	0	0	0	1	0	0	0	0	0	0	0	1	0	0	0	6	0	0	0	0	0	0	0.019
[BMIM][PF6]	[BMIM]	[PF6]	298.1	0.504	1	1	4	2	0	0	0	0	0	0	0	0	0	0	0	0	0	0	0	1	0	0	0	0	1	0	0	0	0	0	0	0	1	0	0	0	6	0	0	0	0	0	0	0.009
[BMIM][PF6]	[BMIM]	[PF6]	298	0.105	1	1	4	2	0	0	0	0	0	0	0	0	0	0	0	0	0	0	0	1	0	0	0	0	1	0	0	0	0	0	0	0	1	0	0	0	6	0	0	0	0	0	0	0.001
[EMIM][Tf2N]	[EMIM]	[Tf2N]	298.1	19.998	1	1	2	2	0	0	0	0	0	0	0	0	0	0	0	0	0	0	0	1	0	0	0	0	0	0	0	0	1	0	0	0	0	0	0	0	2	0	0	1	0	0	0	0.39
[EMIM][Tf2N]	[EMIM]	[Tf2N]	298.1	14.995	1	1	2	2	0	0	0	0	0	0	0	0	0	0	0	0	0	0	0	1	0	0	0	0	0	0	0	0	1	0	0	0	0	0	0	0	2	0	0	1	0	0	0	0.317
[EMIM][Tf2N]	[EMIM]	[Tf2N]	298.1	12.999	1	1	2	2	0	0	0	0	0	0	0	0	0	0	0	0	0	0	0	1	0	0	0	0	0	0	0	0	1	0	0	0	0	0	0	0	2	0	0	1	0	0	0	0.287
[EMIM][Tf2N]	[EMIM]	[Tf2N]	298.2	9.997	1	1	2	2	0	0	0	0	0	0	0	0	0	0	0	0	0	0	0	1	0	0	0	0	0	0	0	0	1	0	0	0	0	0	0	0	2	0	0	1	0	0	0	0.234
[EMIM][Tf2N]	[EMIM]	[Tf2N]	298.2	6.998	1	1	2	2	0	0	0	0	0	0	0	0	0	0	0	0	0	0	0	1	0	0	0	0	0	0	0	0	1	0	0	0	0	0	0	0	2	0	0	1	0	0	0	0.174
[EMIM][Tf2N]	[EMIM]	[Tf2N]	297.9	3.998	1	1	2	2	0	0	0	0	0	0	0	0	0	0	0	0	0	0	0	1	0	0	0	0	0	0	0	0	1	0	0	0	0	0	0	0	2	0	0	1	0	0	0	0.107
[EMIM][Tf2N]	[EMIM]	[Tf2N]	298	0.998	1	1	2	2	0	0	0	0	0	0	0	0	0	0	0	0	0	0	0	1	0	0	0	0	0	0	0	0	1	0	0	0	0	0	0	0	2	0	0	1	0	0	0	0.03
[EMIM][Tf2N]	[EMIM]	[Tf2N]	298.1	0.5	1	1	2	2	0	0	0	0	0	0	0	0	0	0	0	0	0	0	0	1	0	0	0	0	0	0	0	0	1	0	0	0	0	0	0	0	2	0	0	1	0	0	0	0.015
[EMIM][Tf2N]	[EMIM]	[Tf2N]	298.2	0.1	1	1	2	2	0	0	0	0	0	0	0	0	0	0	0	0	0	0	0	1	0	0	0	0	0	0	0	0	1	0	0	0	0	0	0	0	2	0	0	1	0	0	0	0.004
[HMIM][Tf2N]	[HMIM]	[Tf2N]	297.3	19.748	1	1	6	2	0	0	0	0	0	0	0	0	0	0	0	0	0	0	0	1	0	0	0	0	0	0	0	0	1	0	0	0	0	0	0	0	2	0	0	1	0	0	0	0.433
[HMIM][Tf2N]	[HMIM]	[Tf2N]	297.3	14.82	1	1	6	2	0	0	0	0	0	0	0	0	0	0	0	0	0	0	0	1	0	0	0	0	0	0	0	0	1	0	0	0	0	0	0	0	2	0	0	1	0	0	0	0.36
[HMIM][Tf2N]	[HMIM]	[Tf2N]	297.4	12.848	1	1	6	2	0	0	0	0	0	0	0	0	0	0	0	0	0	0	0	1	0	0	0	0	0	0	0	0	1	0	0	0	0	0	0	0	2	0	0	1	0	0	0	0.326
[HMIM][Tf2N]	[HMIM]	[Tf2N]	297.4	9.89	1	1	6	2	0	0	0	0	0	0	0	0	0	0	0	0	0	0	0	1	0	0	0	0	0	0	0	0	1	0	0	0	0	0	0	0	2	0	0	1	0	0	0	0.27
[HMIM][Tf2N]	[HMIM]	[Tf2N]	297.3	6.922	1	1	6	2	0	0	0	0	0	0	0	0	0	0	0	0	0	0	0	1	0	0	0	0	0	0	0	0	1	0	0	0	0	0	0	0	2	0	0	1	0	0	0	0.203
[HMIM][Tf2N]	[HMIM]	[Tf2N]	297.4	3.943	1	1	6	2	0	0	0	0	0	0	0	0	0	0	0	0	0	0	0	1	0	0	0	0	0	0	0	0	1	0	0	0	0	0	0	0	2	0	0	1	0	0	0	0.126
[HMIM][Tf2N]	[HMIM]	[Tf2N]	297.3	0.983	1	1	6	2	0	0	0	0	0	0	0	0	0	0	0	0	0	0	0	1	0	0	0	0	0	0	0	0	1	0	0	0	0	0	0	0	2	0	0	1	0	0	0	0.037
[HMIM][Tf2N]	[HMIM]	[Tf2N]	297.4	0.487	1	1	6	2	0	0	0	0	0	0	0	0	0	0	0	0	0	0	0	1	0	0	0	0	0	0	0	0	1	0	0	0	0	0	0	0	2	0	0	1	0	0	0	0.02
[HMIM][Tf2N]	[HMIM]	[Tf2N]	297.4	0.091	1	1	6	2	0	0	0	0	0	0	0	0	0	0	0	0	0	0	0	1	0	0	0	0	0	0	0	0	1	0	0	0	0	0	0	0	2	0	0	1	0	0	0	0.006
[BMIM][TFA]	[BMIM]	[TFA]	298.1	19.996	1	1	4	2	0	0	0	0	0	0	0	0	0	0	0	0	0	0	0	1	0	0	0	0	0	0	0	0	0	1	0	0	0	0	0	0	1	0	0	1	0	0	0	0.301
[BMIM][TFA]	[BMIM]	[TFA]	298.1	14.996	1	1	4	2	0	0	0	0	0	0	0	0	0	0	0	0	0	0	0	1	0	0	0	0	0	0	0	0	0	1	0	0	0	0	0	0	1	0	0	1	0	0	0	0.239
[BMIM][TFA]	[BMIM]	[TFA]	298.1	13.004	1	1	4	2	0	0	0	0	0	0	0	0	0	0	0	0	0	0	0	1	0	0	0	0	0	0	0	0	0	1	0	0	0	0	0	0	1	0	0	1	0	0	0	0.213
[BMIM][TFA]	[BMIM]	[TFA]	298.1	9.996	1	1	4	2	0	0	0	0	0	0	0	0	0	0	0	0	0	0	0	1	0	0	0	0	0	0	0	0	0	1	0	0	0	0	0	0	1	0	0	1	0	0	0	0.172
[BMIM][TFA]	[BMIM]	[TFA]	298.2	6.992	1	1	4	2	0	0	0	0	0	0	0	0	0	0	0	0	0	0	0	1	0	0	0	0	0	0	0	0	0	1	0	0	0	0	0	0	1	0	0	1	0	0	0	0.123
[BMIM][TFA]	[BMIM]	[TFA]	298	3.999	1	1	4	2	0	0	0	0	0	0	0	0	0	0	0	0	0	0	0	1	0	0	0	0	0	0	0	0	0	1	0	0	0	0	0	0	1	0	0	1	0	0	0	0.075
[BMIM][TFA]	[BMIM]	[TFA]	298.1	1.001	1	1	4	2	0	0	0	0	0	0	0	0	0	0	0	0	0	0	0	1	0	0	0	0	0	0	0	0	0	1	0	0	0	0	0	0	1	0	0	1	0	0	0	0.022
[BMIM][TFA]	[BMIM]	[TFA]	298.1	0.504	1	1	4	2	0	0	0	0	0	0	0	0	0	0	0	0	0	0	0	1	0	0	0	0	0	0	0	0	0	1	0	0	0	0	0	0	1	0	0	1	0	0	0	0.013
[BMIM][TFA]	[BMIM]	[TFA]	298.1	0.105	1	1	4	2	0	0	0	0	0	0	0	0	0	0	0	0	0	0	0	1	0	0	0	0	0	0	0	0	0	1	0	0	0	0	0	0	1	0	0	1	0	0	0	0.005
[EMIM][TFA]	[EMIM]	[TFA]	298.1	19.996	1	1	2	2	0	0	0	0	0	0	0	0	0	0	0	0	0	0	0	1	0	0	0	0	0	0	0	0	0	1	0	0	0	0	0	0	1	0	0	1	0	0	0	0.282
[EMIM][TFA]	[EMIM]	[TFA]	298.1	14.998	1	1	2	2	0	0	0	0	0	0	0	0	0	0	0	0	0	0	0	1	0	0	0	0	0	0	0	0	0	1	0	0	0	0	0	0	1	0	0	1	0	0	0	0.226
[EMIM][TFA]	[EMIM]	[TFA]	298.1	12.997	1	1	2	2	0	0	0	0	0	0	0	0	0	0	0	0	0	0	0	1	0	0	0	0	0	0	0	0	0	1	0	0	0	0	0	0	1	0	0	1	0	0	0	0.201
[EMIM][TFA]	[EMIM]	[TFA]	298.1	9.999	1	1	2	2	0	0	0	0	0	0	0	0	0	0	0	0	0	0	0	1	0	0	0	0	0	0	0	0	0	1	0	0	0	0	0	0	1	0	0	1	0	0	0	0.16
[EMIM][TFA]	[EMIM]	[TFA]	298.1	6.997	1	1	2	2	0	0	0	0	0	0	0	0	0	0	0	0	0	0	0	1	0	0	0	0	0	0	0	0	0	1	0	0	0	0	0	0	1	0	0	1	0	0	0	0.115
[EMIM][TFA]	[EMIM]	[TFA]	298.1	3.999	1	1	2	2	0	0	0	0	0	0	0	0	0	0	0	0	0	0	0	1	0	0	0	0	0	0	0	0	0	1	0	0	0	0	0	0	1	0	0	1	0	0	0	0.068
[EMIM][TFA]	[EMIM]	[TFA]	298.1	0.998	1	1	2	2	0	0	0	0	0	0	0	0	0	0	0	0	0	0	0	1	0	0	0	0	0	0	0	0	0	1	0	0	0	0	0	0	1	0	0	1	0	0	0	0.018
[EMIM][TFA]	[EMIM]	[TFA]	298.1	0.498	1	1	2	2	0	0	0	0	0	0	0	0	0	0	0	0	0	0	0	1	0	0	0	0	0	0	0	0	0	1	0	0	0	0	0	0	1	0	0	1	0	0	0	0.009
[EMIM][TFA]	[EMIM]	[TFA]	298.1	0.1	1	1	2	2	0	0	0	0	0	0	0	0	0	0	0	0	0	0	0	1	0	0	0	0	0	0	0	0	0	1	0	0	0	0	0	0	1	0	0	1	0	0	0	0.001
[BMIM][BF4]	[BMIM]	[BF4]	298.15	60.7	1	1	4	2	0	0	0	0	0	0	0	0	0	0	0	0	0	0	0	1	0	1	0	0	0	0	0	0	0	0	0	0	1	0	0	0	4	0	0	0	0	0	0	0.528048
[BMIM][BF4]	[BMIM]	[BF4]	298.15	51.7	1	1	4	2	0	0	0	0	0	0	0	0	0	0	0	0	0	0	0	1	0	1	0	0	0	0	0	0	0	0	0	0	1	0	0	0	4	0	0	0	0	0	0	0.492797
[BMIM][BF4]	[BMIM]	[BF4]	298.15	40.6	1	1	4	2	0	0	0	0	0	0	0	0	0	0	0	0	0	0	0	1	0	1	0	0	0	0	0	0	0	0	0	0	1	0	0	0	4	0	0	0	0	0	0	0.427826
[BMIM][BF4]	[BMIM]	[BF4]	298.15	31.4	1	1	4	2	0	0	0	0	0	0	0	0	0	0	0	0	0	0	0	1	0	1	0	0	0	0	0	0	0	0	0	0	1	0	0	0	4	0	0	0	0	0	0	0.36175
[BMIM][BF4]	[BMIM]	[BF4]	298.15	21.3	1	1	4	2	0	0	0	0	0	0	0	0	0	0	0	0	0	0	0	1	0	1	0	0	0	0	0	0	0	0	0	0	1	0	0	0	4	0	0	0	0	0	0	0.270041
[BMIM][BF4]	[BMIM]	[BF4]	298.15	13	1	1	4	2	0	0	0	0	0	0	0	0	0	0	0	0	0	0	0	1	0	1	0	0	0	0	0	0	0	0	0	0	1	0	0	0	4	0	0	0	0	0	0	0.175877
[BMIM][BF4]	[BMIM]	[BF4]	298.15	6.5	1	1	4	2	0	0	0	0	0	0	0	0	0	0	0	0	0	0	0	1	0	1	0	0	0	0	0	0	0	0	0	0	1	0	0	0	4	0	0	0	0	0	0	0.104854
[BMIM][BF4]	[BMIM]	[BF4]	313.2	59.8	1	1	4	2	0	0	0	0	0	0	0	0	0	0	0	0	0	0	0	1	0	1	0	0	0	0	0	0	0	0	0	0	1	0	0	0	4	0	0	0	0	0	0	0.466
[BMIM][BF4]	[BMIM]	[BF4]	333.2	59.5	1	1	4	2	0	0	0	0	0	0	0	0	0	0	0	0	0	0	0	1	0	1	0	0	0	0	0	0	0	0	0	0	1	0	0	0	4	0	0	0	0	0	0	0.362
[BMIM][BF4]	[BMIM]	[BF4]	313.2	55.3	1	1	4	2	0	0	0	0	0	0	0	0	0	0	0	0	0	0	0	1	0	1	0	0	0	0	0	0	0	0	0	0	1	0	0	0	4	0	0	0	0	0	0	0.4402
[BMIM][BF4]	[BMIM]	[BF4]	298.2	55	1	1	4	2	0	0	0	0	0	0	0	0	0	0	0	0	0	0	0	1	0	1	0	0	0	0	0	0	0	0	0	0	1	0	0	0	4	0	0	0	0	0	0	0.49
[BMIM][BF4]	[BMIM]	[BF4]	333.2	54.3	1	1	4	2	0	0	0	0	0	0	0	0	0	0	0	0	0	0	0	1	0	1	0	0	0	0	0	0	0	0	0	0	1	0	0	0	4	0	0	0	0	0	0	0.324
[BMIM][BF4]	[BMIM]	[BF4]	333.2	53.9	1	1	4	2	0	0	0	0	0	0	0	0	0	0	0	0	0	0	0	1	0	1	0	0	0	0	0	0	0	0	0	0	1	0	0	0	4	0	0	0	0	0	0	0.36
[BMIM][BF4]	[BMIM]	[BF4]	298.2	49.3	1	1	4	2	0	0	0	0	0	0	0	0	0	0	0	0	0	0	0	1	0	1	0	0	0	0	0	0	0	0	0	0	1	0	0	0	4	0	0	0	0	0	0	0.477
[BMIM][BF4]	[BMIM]	[BF4]	313.2	49.1	1	1	4	2	0	0	0	0	0	0	0	0	0	0	0	0	0	0	0	1	0	1	0	0	0	0	0	0	0	0	0	0	1	0	0	0	4	0	0	0	0	0	0	0.4106
[BMIM][BF4]	[BMIM]	[BF4]	313.2	48.1	1	1	4	2	0	0	0	0	0	0	0	0	0	0	0	0	0	0	0	1	0	1	0	0	0	0	0	0	0	0	0	0	1	0	0	0	4	0	0	0	0	0	0	0.38
[BMIM][BF4]	[BMIM]	[BF4]	333.2	44.2	1	1	4	2	0	0	0	0	0	0	0	0	0	0	0	0	0	0	0	1	0	1	0	0	0	0	0	0	0	0	0	0	1	0	0	0	4	0	0	0	0	0	0	0.3167
[BMIM][BF4]	[BMIM]	[BF4]	298.2	43.3	1	1	4	2	0	0	0	0	0	0	0	0	0	0	0	0	0	0	0	1	0	1	0	0	0	0	0	0	0	0	0	0	1	0	0	0	4	0	0	0	0	0	0	0.435
[BMIM][BF4]	[BMIM]	[BF4]	313.2	42.9	1	1	4	2	0	0	0	0	0	0	0	0	0	0	0	0	0	0	0	1	0	1	0	0	0	0	0	0	0	0	0	0	1	0	0	0	4	0	0	0	0	0	0	0.35
[BMIM][BF4]	[BMIM]	[BF4]	333.2	41.7	1	1	4	2	0	0	0	0	0	0	0	0	0	0	0	0	0	0	0	1	0	1	0	0	0	0	0	0	0	0	0	0	1	0	0	0	4	0	0	0	0	0	0	0.284
[BMIM][BF4]	[BMIM]	[BF4]	313.2	38.4	1	1	4	2	0	0	0	0	0	0	0	0	0	0	0	0	0	0	0	1	0	1	0	0	0	0	0	0	0	0	0	0	1	0	0	0	4	0	0	0	0	0	0	0.325
[BMIM][BF4]	[BMIM]	[BF4]	313.2	38.3	1	1	4	2	0	0	0	0	0	0	0	0	0	0	0	0	0	0	0	1	0	1	0	0	0	0	0	0	0	0	0	0	1	0	0	0	4	0	0	0	0	0	0	0.337
[BMIM][BF4]	[BMIM]	[BF4]	333.2	37.6	1	1	4	2	0	0	0	0	0	0	0	0	0	0	0	0	0	0	0	1	0	1	0	0	0	0	0	0	0	0	0	0	1	0	0	0	4	0	0	0	0	0	0	0.244
[BMIM][BF4]	[BMIM]	[BF4]	298.2	36.9	1	1	4	2	0	0	0	0	0	0	0	0	0	0	0	0	0	0	0	1	0	1	0	0	0	0	0	0	0	0	0	0	1	0	0	0	4	0	0	0	0	0	0	0.393
[BMIM][BF4]	[BMIM]	[BF4]	333.2	34.1	1	1	4	2	0	0	0	0	0	0	0	0	0	0	0	0	0	0	0	1	0	1	0	0	0	0	0	0	0	0	0	0	1	0	0	0	4	0	0	0	0	0	0	0.2615
[BMIM][BF4]	[BMIM]	[BF4]	298.2	32.9	1	1	4	2	0	0	0	0	0	0	0	0	0	0	0	0	0	0	0	1	0	1	0	0	0	0	0	0	0	0	0	0	1	0	0	0	4	0	0	0	0	0	0	0.331
[BMIM][BF4]	[BMIM]	[BF4]	313.2	32.6	1	1	4	2	0	0	0	0	0	0	0	0	0	0	0	0	0	0	0	1	0	1	0	0	0	0	0	0	0	0	0	0	1	0	0	0	4	0	0	0	0	0	0	0.285
[BMIM][BF4]	[BMIM]	[BF4]	333.2	29.6	1	1	4	2	0	0	0	0	0	0	0	0	0	0	0	0	0	0	0	1	0	1	0	0	0	0	0	0	0	0	0	0	1	0	0	0	4	0	0	0	0	0	0	0.2
[BMIM][BF4]	[BMIM]	[BF4]	313.2	28.6	1	1	4	2	0	0	0	0	0	0	0	0	0	0	0	0	0	0	0	1	0	1	0	0	0	0	0	0	0	0	0	0	1	0	0	0	4	0	0	0	0	0	0	0.2849
[BMIM][BF4]	[BMIM]	[BF4]	333.2	24.4	1	1	4	2	0	0	0	0	0	0	0	0	0	0	0	0	0	0	0	1	0	1	0	0	0	0	0	0	0	0	0	0	1	0	0	0	4	0	0	0	0	0	0	0.169
[BMIM][BF4]	[BMIM]	[BF4]	333.2	24.2	1	1	4	2	0	0	0	0	0	0	0	0	0	0	0	0	0	0	0	1	0	1	0	0	0	0	0	0	0	0	0	0	1	0	0	0	4	0	0	0	0	0	0	0.2077
[BMIM][BF4]	[BMIM]	[BF4]	298.2	23.1	1	1	4	2	0	0	0	0	0	0	0	0	0	0	0	0	0	0	0	1	0	1	0	0	0	0	0	0	0	0	0	0	1	0	0	0	4	0	0	0	0	0	0	0.264
[BMIM][BF4]	[BMIM]	[BF4]	313.2	22.7	1	1	4	2	0	0	0	0	0	0	0	0	0	0	0	0	0	0	0	1	0	1	0	0	0	0	0	0	0	0	0	0	1	0	0	0	4	0	0	0	0	0	0	0.197
[BMIM][BF4]	[BMIM]	[BF4]	313.2	19.4	1	1	4	2	0	0	0	0	0	0	0	0	0	0	0	0	0	0	0	1	0	1	0	0	0	0	0	0	0	0	0	0	1	0	0	0	4	0	0	0	0	0	0	0.2055
[BMIM][BF4]	[BMIM]	[BF4]	313.2	16.5	1	1	4	2	0	0	0	0	0	0	0	0	0	0	0	0	0	0	0	1	0	1	0	0	0	0	0	0	0	0	0	0	1	0	0	0	4	0	0	0	0	0	0	0.154
[BMIM][BF4]	[BMIM]	[BF4]	333.2	16.5	1	1	4	2	0	0	0	0	0	0	0	0	0	0	0	0	0	0	0	1	0	1	0	0	0	0	0	0	0	0	0	0	1	0	0	0	4	0	0	0	0	0	0	0.119
[BMIM][BF4]	[BMIM]	[BF4]	333.2	14.8	1	1	4	2	0	0	0	0	0	0	0	0	0	0	0	0	0	0	0	1	0	1	0	0	0	0	0	0	0	0	0	0	1	0	0	0	4	0	0	0	0	0	0	0.1304
[BMIM][BF4]	[BMIM]	[BF4]	298.2	12.4	1	1	4	2	0	0	0	0	0	0	0	0	0	0	0	0	0	0	0	1	0	1	0	0	0	0	0	0	0	0	0	0	1	0	0	0	4	0	0	0	0	0	0	0.137
[BMIM][BF4]	[BMIM]	[BF4]	333.2	11.3	1	1	4	2	0	0	0	0	0	0	0	0	0	0	0	0	0	0	0	1	0	1	0	0	0	0	0	0	0	0	0	0	1	0	0	0	4	0	0	0	0	0	0	0.093
[BMIM][BF4]	[BMIM]	[BF4]	313.2	11.2	1	1	4	2	0	0	0	0	0	0	0	0	0	0	0	0	0	0	0	1	0	1	0	0	0	0	0	0	0	0	0	0	1	0	0	0	4	0	0	0	0	0	0	0.1158
[BMIM][BF4]	[BMIM]	[BF4]	333.2	9.8	1	1	4	2	0	0	0	0	0	0	0	0	0	0	0	0	0	0	0	1	0	1	0	0	0	0	0	0	0	0	0	0	1	0	0	0	4	0	0	0	0	0	0	0.072
[BMIM][BF4]	[BMIM]	[BF4]	313.2	8.6	1	1	4	2	0	0	0	0	0	0	0	0	0	0	0	0	0	0	0	1	0	1	0	0	0	0	0	0	0	0	0	0	1	0	0	0	4	0	0	0	0	0	0	0.082
[BMIM][BF4]	[BMIM]	[BF4]	323.1	1.92	1	1	4	2	0	0	0	0	0	0	0	0	0	0	0	0	0	0	0	1	0	1	0	0	0	0	0	0	0	0	0	0	1	0	0	0	4	0	0	0	0	0	0	0.0208
[BMIM][BF4]	[BMIM]	[BF4]	352.4	1.9	1	1	4	2	0	0	0	0	0	0	0	0	0	0	0	0	0	0	0	1	0	1	0	0	0	0	0	0	0	0	0	0	1	0	0	0	4	0	0	0	0	0	0	0.0131
[BMIM][BF4]	[BMIM]	[BF4]	342.9	1.81	1	1	4	2	0	0	0	0	0	0	0	0	0	0	0	0	0	0	0	1	0	1	0	0	0	0	0	0	0	0	0	0	1	0	0	0	4	0	0	0	0	0	0	0.014
[BMIM][BF4]	[BMIM]	[BF4]	313.3	1.79	1	1	4	2	0	0	0	0	0	0	0	0	0	0	0	0	0	0	0	1	0	1	0	0	0	0	0	0	0	0	0	0	1	0	0	0	4	0	0	0	0	0	0	0.0227
[BMIM][BF4]	[BMIM]	[BF4]	332.9	1.71	1	1	4	2	0	0	0	0	0	0	0	0	0	0	0	0	0	0	0	1	0	1	0	0	0	0	0	0	0	0	0	0	1	0	0	0	4	0	0	0	0	0	0	0.0152
[BMIM][BF4]	[BMIM]	[BF4]	298.6	1.59	1	1	4	2	0	0	0	0	0	0	0	0	0	0	0	0	0	0	0	1	0	1	0	0	0	0	0	0	0	0	0	0	1	0	0	0	4	0	0	0	0	0	0	0.0261
[BMIM][BF4]	[BMIM]	[BF4]	352	1.2	1	1	4	2	0	0	0	0	0	0	0	0	0	0	0	0	0	0	0	1	0	1	0	0	0	0	0	0	0	0	0	0	1	0	0	0	4	0	0	0	0	0	0	0.0078
[BMIM][BF4]	[BMIM]	[BF4]	298.6	1.18	1	1	4	2	0	0	0	0	0	0	0	0	0	0	0	0	0	0	0	1	0	1	0	0	0	0	0	0	0	0	0	0	1	0	0	0	4	0	0	0	0	0	0	0.0196
[BMIM][BF4]	[BMIM]	[BF4]	333.8	1.07	1	1	4	2	0	0	0	0	0	0	0	0	0	0	0	0	0	0	0	1	0	1	0	0	0	0	0	0	0	0	0	0	1	0	0	0	4	0	0	0	0	0	0	0.0094
[BMIM][BF4]	[BMIM]	[BF4]	324.5	1.01	1	1	4	2	0	0	0	0	0	0	0	0	0	0	0	0	0	0	0	1	0	1	0	0	0	0	0	0	0	0	0	0	1	0	0	0	4	0	0	0	0	0	0	0.0102
[BMIM][BF4]	[BMIM]	[BF4]	313.1	0.92	1	1	4	2	0	0	0	0	0	0	0	0	0	0	0	0	0	0	0	1	0	1	0	0	0	0	0	0	0	0	0	0	1	0	0	0	4	0	0	0	0	0	0	0.012
[BMIM][BF4]	[BMIM]	[BF4]	298.4	0.81	1	1	4	2	0	0	0	0	0	0	0	0	0	0	0	0	0	0	0	1	0	1	0	0	0	0	0	0	0	0	0	0	1	0	0	0	4	0	0	0	0	0	0	0.014
[BMIM][BF4]	[BMIM]	[BF4]	354.2	0.65	1	1	4	2	0	0	0	0	0	0	0	0	0	0	0	0	0	0	0	1	0	1	0	0	0	0	0	0	0	0	0	0	1	0	0	0	4	0	0	0	0	0	0	0.004
[BMIM][BF4]	[BMIM]	[BF4]	298.6	0.61	1	1	4	2	0	0	0	0	0	0	0	0	0	0	0	0	0	0	0	1	0	1	0	0	0	0	0	0	0	0	0	0	1	0	0	0	4	0	0	0	0	0	0	0.0101
[BMIM][BF4]	[BMIM]	[BF4]	324.7	0.46	1	1	4	2	0	0	0	0	0	0	0	0	0	0	0	0	0	0	0	1	0	1	0	0	0	0	0	0	0	0	0	0	1	0	0	0	4	0	0	0	0	0	0	0.0043
[BMIM][PF6]	[BMIM]	[PF6]	323.6	1.86	1	1	4	2	0	0	0	0	0	0	0	0	0	0	0	0	0	0	0	1	0	0	0	0	1	0	0	0	0	0	0	0	1	0	0	0	6	0	0	0	0	0	0	0.0223
[BMIM][PF6]	[BMIM]	[PF6]	353.8	1.81	1	1	4	2	0	0	0	0	0	0	0	0	0	0	0	0	0	0	0	1	0	0	0	0	1	0	0	0	0	0	0	0	1	0	0	0	6	0	0	0	0	0	0	0.0145
[BMIM][PF6]	[BMIM]	[PF6]	334.3	1.8	1	1	4	2	0	0	0	0	0	0	0	0	0	0	0	0	0	0	0	1	0	0	0	0	1	0	0	0	0	0	0	0	1	0	0	0	6	0	0	0	0	0	0	0.0186
[BMIM][PF6]	[BMIM]	[PF6]	313.6	1.71	1	1	4	2	0	0	0	0	0	0	0	0	0	0	0	0	0	0	0	1	0	0	0	0	1	0	0	0	0	0	0	0	1	0	0	0	6	0	0	0	0	0	0	0.0239
[BMIM][PF6]	[BMIM]	[PF6]	352.5	1.71	1	1	4	2	0	0	0	0	0	0	0	0	0	0	0	0	0	0	0	1	0	0	0	0	1	0	0	0	0	0	0	0	1	0	0	0	6	0	0	0	0	0	0	0.0136
[BMIM][PF6]	[BMIM]	[PF6]	342.4	1.69	1	1	4	2	0	0	0	0	0	0	0	0	0	0	0	0	0	0	0	1	0	0	0	0	1	0	0	0	0	0	0	0	1	0	0	0	6	0	0	0	0	0	0	0.0157
[BMIM][PF6]	[BMIM]	[PF6]	344.7	1.63	1	1	4	2	0	0	0	0	0	0	0	0	0	0	0	0	0	0	0	1	0	0	0	0	1	0	0	0	0	0	0	0	1	0	0	0	6	0	0	0	0	0	0	0.0144
[BMIM][PF6]	[BMIM]	[PF6]	322.7	1.62	1	1	4	2	0	0	0	0	0	0	0	0	0	0	0	0	0	0	0	1	0	0	0	0	1	0	0	0	0	0	0	0	1	0	0	0	6	0	0	0	0	0	0	0.0189
[BMIM][PF6]	[BMIM]	[PF6]	332.3	1.58	1	1	4	2	0	0	0	0	0	0	0	0	0	0	0	0	0	0	0	1	0	0	0	0	1	0	0	0	0	0	0	0	1	0	0	0	6	0	0	0	0	0	0	0.0168
[BMIM][PF6]	[BMIM]	[PF6]	354.9	1.56	1	1	4	2	0	0	0	0	0	0	0	0	0	0	0	0	0	0	0	1	0	0	0	0	1	0	0	0	0	0	0	0	1	0	0	0	6	0	0	0	0	0	0	0.0123
[BMIM][PF6]	[BMIM]	[PF6]	334	1.53	1	1	4	2	0	0	0	0	0	0	0	0	0	0	0	0	0	0	0	1	0	0	0	0	1	0	0	0	0	0	0	0	1	0	0	0	6	0	0	0	0	0	0	0.0166
[BMIM][PF6]	[BMIM]	[PF6]	298.8	1.49	1	1	4	2	0	0	0	0	0	0	0	0	0	0	0	0	0	0	0	1	0	0	0	0	1	0	0	0	0	0	0	0	1	0	0	0	6	0	0	0	0	0	0	0.0271
[BMIM][PF6]	[BMIM]	[PF6]	313	1.49	1	1	4	2	0	0	0	0	0	0	0	0	0	0	0	0	0	0	0	1	0	0	0	0	1	0	0	0	0	0	0	0	1	0	0	0	6	0	0	0	0	0	0	0.0203
[BMIM][PF6]	[BMIM]	[PF6]	332.7	1.46	1	1	4	2	0	0	0	0	0	0	0	0	0	0	0	0	0	0	0	1	0	0	0	0	1	0	0	0	0	0	0	0	1	0	0	0	6	0	0	0	0	0	0	0.0151
[BMIM][PF6]	[BMIM]	[PF6]	298.3	1.09	1	1	4	2	0	0	0	0	0	0	0	0	0	0	0	0	0	0	0	1	0	0	0	0	1	0	0	0	0	0	0	0	1	0	0	0	6	0	0	0	0	0	0	0.0197
[BMIM][PF6]	[BMIM]	[PF6]	313.3	1.03	1	1	4	2	0	0	0	0	0	0	0	0	0	0	0	0	0	0	0	1	0	0	0	0	1	0	0	0	0	0	0	0	1	0	0	0	6	0	0	0	0	0	0	0.0162
[BMIM][PF6]	[BMIM]	[PF6]	312.3	0.97	1	1	4	2	0	0	0	0	0	0	0	0	0	0	0	0	0	0	0	1	0	0	0	0	1	0	0	0	0	0	0	0	1	0	0	0	6	0	0	0	0	0	0	0.0133
[BMIM][PF6]	[BMIM]	[PF6]	334.4	0.78	1	1	4	2	0	0	0	0	0	0	0	0	0	0	0	0	0	0	0	1	0	0	0	0	1	0	0	0	0	0	0	0	1	0	0	0	6	0	0	0	0	0	0	0.0077
[BMIM][PF6]	[BMIM]	[PF6]	354.7	0.73	1	1	4	2	0	0	0	0	0	0	0	0	0	0	0	0	0	0	0	1	0	0	0	0	1	0	0	0	0	0	0	0	1	0	0	0	6	0	0	0	0	0	0	0.0056
[BMIM][PF6]	[BMIM]	[PF6]	313.5	0.64	1	1	4	2	0	0	0	0	0	0	0	0	0	0	0	0	0	0	0	1	0	0	0	0	1	0	0	0	0	0	0	0	1	0	0	0	6	0	0	0	0	0	0	0.01
[BMIM][Cl]	[BMIM]	[Cl]	373.15	369.46	1	1	4	2	0	0	0	0	0	0	0	0	0	0	0	0	0	0	0	1	0	0	1	0	0	0	0	0	0	0	0	0	0	0	0	0	0	0	0	0	0	0	0	0.406
[BMIM][Cl]	[BMIM]	[Cl]	368.15	349.47	1	1	4	2	0	0	0	0	0	0	0	0	0	0	0	0	0	0	0	1	0	0	1	0	0	0	0	0	0	0	0	0	0	0	0	0	0	0	0	0	0	0	0	0.406
[BMIM][Cl]	[BMIM]	[Cl]	363.15	330.17	1	1	4	2	0	0	0	0	0	0	0	0	0	0	0	0	0	0	0	1	0	0	1	0	0	0	0	0	0	0	0	0	0	0	0	0	0	0	0	0	0	0	0	0.406
[BMIM][Cl]	[BMIM]	[Cl]	358.15	311.9	1	1	4	2	0	0	0	0	0	0	0	0	0	0	0	0	0	0	0	1	0	0	1	0	0	0	0	0	0	0	0	0	0	0	0	0	0	0	0	0	0	0	0	0.406
[BMIM][Cl]	[BMIM]	[Cl]	353.15	293.64	1	1	4	2	0	0	0	0	0	0	0	0	0	0	0	0	0	0	0	1	0	0	1	0	0	0	0	0	0	0	0	0	0	0	0	0	0	0	0	0	0	0	0	0.406
[BMIM][Cl]	[BMIM]	[Cl]	373.15	282.26	1	1	4	2	0	0	0	0	0	0	0	0	0	0	0	0	0	0	0	1	0	0	1	0	0	0	0	0	0	0	0	0	0	0	0	0	0	0	0	0	0	0	0	0.3777
[BMIM][Cl]	[BMIM]	[Cl]	368.15	269.97	1	1	4	2	0	0	0	0	0	0	0	0	0	0	0	0	0	0	0	1	0	0	1	0	0	0	0	0	0	0	0	0	0	0	0	0	0	0	0	0	0	0	0	0.3777
[BMIM][Cl]	[BMIM]	[Cl]	363.15	255.73	1	1	4	2	0	0	0	0	0	0	0	0	0	0	0	0	0	0	0	1	0	0	1	0	0	0	0	0	0	0	0	0	0	0	0	0	0	0	0	0	0	0	0	0.3777
[BMIM][Cl]	[BMIM]	[Cl]	358.15	233.5	1	1	4	2	0	0	0	0	0	0	0	0	0	0	0	0	0	0	0	1	0	0	1	0	0	0	0	0	0	0	0	0	0	0	0	0	0	0	0	0	0	0	0	0.3777
[BMIM][Cl]	[BMIM]	[Cl]	353.15	212.99	1	1	4	2	0	0	0	0	0	0	0	0	0	0	0	0	0	0	0	1	0	0	1	0	0	0	0	0	0	0	0	0	0	0	0	0	0	0	0	0	0	0	0	0.3777
[BMIM][Cl]	[BMIM]	[Cl]	373.15	184.73	1	1	4	2	0	0	0	0	0	0	0	0	0	0	0	0	0	0	0	1	0	0	1	0	0	0	0	0	0	0	0	0	0	0	0	0	0	0	0	0	0	0	0	0.343
[BMIM][Cl]	[BMIM]	[Cl]	368.15	171.86	1	1	4	2	0	0	0	0	0	0	0	0	0	0	0	0	0	0	0	1	0	0	1	0	0	0	0	0	0	0	0	0	0	0	0	0	0	0	0	0	0	0	0	0.343
[BMIM][Cl]	[BMIM]	[Cl]	363.15	157.73	1	1	4	2	0	0	0	0	0	0	0	0	0	0	0	0	0	0	0	1	0	0	1	0	0	0	0	0	0	0	0	0	0	0	0	0	0	0	0	0	0	0	0	0.343
[BMIM][Cl]	[BMIM]	[Cl]	373.15	149.95	1	1	4	2	0	0	0	0	0	0	0	0	0	0	0	0	0	0	0	1	0	0	1	0	0	0	0	0	0	0	0	0	0	0	0	0	0	0	0	0	0	0	0	0.3021
[BMIM][Cl]	[BMIM]	[Cl]	358.15	145.27	1	1	4	2	0	0	0	0	0	0	0	0	0	0	0	0	0	0	0	1	0	0	1	0	0	0	0	0	0	0	0	0	0	0	0	0	0	0	0	0	0	0	0	0.343
[BMIM][Cl]	[BMIM]	[Cl]	368.15	142.39	1	1	4	2	0	0	0	0	0	0	0	0	0	0	0	0	0	0	0	1	0	0	1	0	0	0	0	0	0	0	0	0	0	0	0	0	0	0	0	0	0	0	0	0.3021
[BMIM][Cl]	[BMIM]	[Cl]	353.15	136.25	1	1	4	2	0	0	0	0	0	0	0	0	0	0	0	0	0	0	0	1	0	0	1	0	0	0	0	0	0	0	0	0	0	0	0	0	0	0	0	0	0	0	0	0.343
[BMIM][Cl]	[BMIM]	[Cl]	363.15	133.64	1	1	4	2	0	0	0	0	0	0	0	0	0	0	0	0	0	0	0	1	0	0	1	0	0	0	0	0	0	0	0	0	0	0	0	0	0	0	0	0	0	0	0	0.3021
[BMIM][Cl]	[BMIM]	[Cl]	358.15	121.76	1	1	4	2	0	0	0	0	0	0	0	0	0	0	0	0	0	0	0	1	0	0	1	0	0	0	0	0	0	0	0	0	0	0	0	0	0	0	0	0	0	0	0	0.3021
[BMIM][Cl]	[BMIM]	[Cl]	373.15	116.68	1	1	4	2	0	0	0	0	0	0	0	0	0	0	0	0	0	0	0	1	0	0	1	0	0	0	0	0	0	0	0	0	0	0	0	0	0	0	0	0	0	0	0	0.2652
[BMIM][Cl]	[BMIM]	[Cl]	353.15	111.67	1	1	4	2	0	0	0	0	0	0	0	0	0	0	0	0	0	0	0	1	0	0	1	0	0	0	0	0	0	0	0	0	0	0	0	0	0	0	0	0	0	0	0	0.3021
[BMIM][Cl]	[BMIM]	[Cl]	368.15	109.15	1	1	4	2	0	0	0	0	0	0	0	0	0	0	0	0	0	0	0	1	0	0	1	0	0	0	0	0	0	0	0	0	0	0	0	0	0	0	0	0	0	0	0	0.2652
[BMIM][Cl]	[BMIM]	[Cl]	363.15	100.04	1	1	4	2	0	0	0	0	0	0	0	0	0	0	0	0	0	0	0	1	0	0	1	0	0	0	0	0	0	0	0	0	0	0	0	0	0	0	0	0	0	0	0	0.2652
[BMIM][Cl]	[BMIM]	[Cl]	358.15	94.77	1	1	4	2	0	0	0	0	0	0	0	0	0	0	0	0	0	0	0	1	0	0	1	0	0	0	0	0	0	0	0	0	0	0	0	0	0	0	0	0	0	0	0	0.2652
[BMIM][Cl]	[BMIM]	[Cl]	353.15	90.14	1	1	4	2	0	0	0	0	0	0	0	0	0	0	0	0	0	0	0	1	0	0	1	0	0	0	0	0	0	0	0	0	0	0	0	0	0	0	0	0	0	0	0	0.2652
[BMIM][Cl]	[BMIM]	[Cl]	373.15	83.89	1	1	4	2	0	0	0	0	0	0	0	0	0	0	0	0	0	0	0	1	0	0	1	0	0	0	0	0	0	0	0	0	0	0	0	0	0	0	0	0	0	0	0	0.2375
[BMIM][Cl]	[BMIM]	[Cl]	368.15	80.95	1	1	4	2	0	0	0	0	0	0	0	0	0	0	0	0	0	0	0	1	0	0	1	0	0	0	0	0	0	0	0	0	0	0	0	0	0	0	0	0	0	0	0	0.2375
[BMIM][Cl]	[BMIM]	[Cl]	363.15	75.62	1	1	4	2	0	0	0	0	0	0	0	0	0	0	0	0	0	0	0	1	0	0	1	0	0	0	0	0	0	0	0	0	0	0	0	0	0	0	0	0	0	0	0	0.2375
[BMIM][Cl]	[BMIM]	[Cl]	358.15	71.52	1	1	4	2	0	0	0	0	0	0	0	0	0	0	0	0	0	0	0	1	0	0	1	0	0	0	0	0	0	0	0	0	0	0	0	0	0	0	0	0	0	0	0	0.2375
[BMIM][Cl]	[BMIM]	[Cl]	353.15	66.64	1	1	4	2	0	0	0	0	0	0	0	0	0	0	0	0	0	0	0	1	0	0	1	0	0	0	0	0	0	0	0	0	0	0	0	0	0	0	0	0	0	0	0	0.2375
[BMIM][Cl]	[BMIM]	[Cl]	373.15	56.01	1	1	4	2	0	0	0	0	0	0	0	0	0	0	0	0	0	0	0	1	0	0	1	0	0	0	0	0	0	0	0	0	0	0	0	0	0	0	0	0	0	0	0	0.1786
[BMIM][Cl]	[BMIM]	[Cl]	368.15	52.98	1	1	4	2	0	0	0	0	0	0	0	0	0	0	0	0	0	0	0	1	0	0	1	0	0	0	0	0	0	0	0	0	0	0	0	0	0	0	0	0	0	0	0	0.1786
[BMIM][Cl]	[BMIM]	[Cl]	363.15	49.15	1	1	4	2	0	0	0	0	0	0	0	0	0	0	0	0	0	0	0	1	0	0	1	0	0	0	0	0	0	0	0	0	0	0	0	0	0	0	0	0	0	0	0	0.1786
[BMIM][Cl]	[BMIM]	[Cl]	358.15	46.29	1	1	4	2	0	0	0	0	0	0	0	0	0	0	0	0	0	0	0	1	0	0	1	0	0	0	0	0	0	0	0	0	0	0	0	0	0	0	0	0	0	0	0	0.1786
[BMIM][Cl]	[BMIM]	[Cl]	353.15	43.38	1	1	4	2	0	0	0	0	0	0	0	0	0	0	0	0	0	0	0	1	0	0	1	0	0	0	0	0	0	0	0	0	0	0	0	0	0	0	0	0	0	0	0	0.1786
[BMIM][Cl]	[BMIM]	[Cl]	373.15	40.51	1	1	4	2	0	0	0	0	0	0	0	0	0	0	0	0	0	0	0	1	0	0	1	0	0	0	0	0	0	0	0	0	0	0	0	0	0	0	0	0	0	0	0	0.1522
[BMIM][Cl]	[BMIM]	[Cl]	368.15	38.48	1	1	4	2	0	0	0	0	0	0	0	0	0	0	0	0	0	0	0	1	0	0	1	0	0	0	0	0	0	0	0	0	0	0	0	0	0	0	0	0	0	0	0	0.1522
[BMIM][Cl]	[BMIM]	[Cl]	363.15	35.82	1	1	4	2	0	0	0	0	0	0	0	0	0	0	0	0	0	0	0	1	0	0	1	0	0	0	0	0	0	0	0	0	0	0	0	0	0	0	0	0	0	0	0	0.1522
[BMIM][Cl]	[BMIM]	[Cl]	358.15	33.8	1	1	4	2	0	0	0	0	0	0	0	0	0	0	0	0	0	0	0	1	0	0	1	0	0	0	0	0	0	0	0	0	0	0	0	0	0	0	0	0	0	0	0	0.1522
[BMIM][Cl]	[BMIM]	[Cl]	353.15	31.42	1	1	4	2	0	0	0	0	0	0	0	0	0	0	0	0	0	0	0	1	0	0	1	0	0	0	0	0	0	0	0	0	0	0	0	0	0	0	0	0	0	0	0	0.1522
[BMIM][Cl]	[BMIM]	[Cl]	373.15	29.69	1	1	4	2	0	0	0	0	0	0	0	0	0	0	0	0	0	0	0	1	0	0	1	0	0	0	0	0	0	0	0	0	0	0	0	0	0	0	0	0	0	0	0	0.1306
[BMIM][Cl]	[BMIM]	[Cl]	368.15	28.09	1	1	4	2	0	0	0	0	0	0	0	0	0	0	0	0	0	0	0	1	0	0	1	0	0	0	0	0	0	0	0	0	0	0	0	0	0	0	0	0	0	0	0	0.1306
[BMIM][Cl]	[BMIM]	[Cl]	363.15	26.67	1	1	4	2	0	0	0	0	0	0	0	0	0	0	0	0	0	0	0	1	0	0	1	0	0	0	0	0	0	0	0	0	0	0	0	0	0	0	0	0	0	0	0	0.1306
[BMIM][Cl]	[BMIM]	[Cl]	358.15	25.25	1	1	4	2	0	0	0	0	0	0	0	0	0	0	0	0	0	0	0	1	0	0	1	0	0	0	0	0	0	0	0	0	0	0	0	0	0	0	0	0	0	0	0	0.1306
[BMIM][Cl]	[BMIM]	[Cl]	353.15	24.54	1	1	4	2	0	0	0	0	0	0	0	0	0	0	0	0	0	0	0	1	0	0	1	0	0	0	0	0	0	0	0	0	0	0	0	0	0	0	0	0	0	0	0	0.1306
[BMIM][DBPO4]	[BMIM]	[DBPO4]	313.15	1.754	1	1	4	2	0	0	0	0	0	0	0	0	0	0	0	0	0	0	0	1	0	0	0	0	0	0	0	0	0	0	0	1	0	0	0	0	2	0	4	0	0	0	0	0.03529
[BMIM][DBPO4]	[BMIM]	[DBPO4]	323.15	1.732	1	1	4	2	0	0	0	0	0	0	0	0	0	0	0	0	0	0	0	1	0	0	0	0	0	0	0	0	0	0	0	1	0	0	0	0	2	0	4	0	0	0	0	0.02984
[BMIM][DBPO4]	[BMIM]	[DBPO4]	333.15	1.6871	1	1	4	2	0	0	0	0	0	0	0	0	0	0	0	0	0	0	0	1	0	0	0	0	0	0	0	0	0	0	0	1	0	0	0	0	2	0	4	0	0	0	0	0.02471
[BMIM][DBPO4]	[BMIM]	[DBPO4]	313.15	1.4996	1	1	4	2	0	0	0	0	0	0	0	0	0	0	0	0	0	0	0	1	0	0	0	0	0	0	0	0	0	0	0	1	0	0	0	0	2	0	4	0	0	0	0	0.02979
[BMIM][DBPO4]	[BMIM]	[DBPO4]	323.15	1.45	1	1	4	2	0	0	0	0	0	0	0	0	0	0	0	0	0	0	0	1	0	0	0	0	0	0	0	0	0	0	0	1	0	0	0	0	2	0	4	0	0	0	0	0.02519
[BMIM][DBPO4]	[BMIM]	[DBPO4]	333.15	1.3617	1	1	4	2	0	0	0	0	0	0	0	0	0	0	0	0	0	0	0	1	0	0	0	0	0	0	0	0	0	0	0	1	0	0	0	0	2	0	4	0	0	0	0	0.01965
[BMIM][DBPO4]	[BMIM]	[DBPO4]	313.15	1.0398	1	1	4	2	0	0	0	0	0	0	0	0	0	0	0	0	0	0	0	1	0	0	0	0	0	0	0	0	0	0	0	1	0	0	0	0	2	0	4	0	0	0	0	0.02056
[BMIM][DBPO4]	[BMIM]	[DBPO4]	323.15	1.0384	1	1	4	2	0	0	0	0	0	0	0	0	0	0	0	0	0	0	0	1	0	0	0	0	0	0	0	0	0	0	0	1	0	0	0	0	2	0	4	0	0	0	0	0.01782
[BMIM][DBPO4]	[BMIM]	[DBPO4]	333.15	1.0315	1	1	4	2	0	0	0	0	0	0	0	0	0	0	0	0	0	0	0	1	0	0	0	0	0	0	0	0	0	0	0	1	0	0	0	0	2	0	4	0	0	0	0	0.01497
[BMIM][DBPO4]	[BMIM]	[DBPO4]	323.15	0.7253	1	1	4	2	0	0	0	0	0	0	0	0	0	0	0	0	0	0	0	1	0	0	0	0	0	0	0	0	0	0	0	1	0	0	0	0	2	0	4	0	0	0	0	0.01255
[BMIM][DBPO4]	[BMIM]	[DBPO4]	333.15	0.7205	1	1	4	2	0	0	0	0	0	0	0	0	0	0	0	0	0	0	0	1	0	0	0	0	0	0	0	0	0	0	0	1	0	0	0	0	2	0	4	0	0	0	0	0.01049
[BMIM][DBPO4]	[BMIM]	[DBPO4]	313.15	0.7198	1	1	4	2	0	0	0	0	0	0	0	0	0	0	0	0	0	0	0	1	0	0	0	0	0	0	0	0	0	0	0	1	0	0	0	0	2	0	4	0	0	0	0	0.01412
[BMIM][DBPO4]	[BMIM]	[DBPO4]	323.15	0.4488	1	1	4	2	0	0	0	0	0	0	0	0	0	0	0	0	0	0	0	1	0	0	0	0	0	0	0	0	0	0	0	1	0	0	0	0	2	0	4	0	0	0	0	0.00773
[BMIM][DBPO4]	[BMIM]	[DBPO4]	333.15	0.4426	1	1	4	2	0	0	0	0	0	0	0	0	0	0	0	0	0	0	0	1	0	0	0	0	0	0	0	0	0	0	0	1	0	0	0	0	2	0	4	0	0	0	0	0.00619
[BMIM][DBPO4]	[BMIM]	[DBPO4]	313.15	0.4357	1	1	4	2	0	0	0	0	0	0	0	0	0	0	0	0	0	0	0	1	0	0	0	0	0	0	0	0	0	0	0	1	0	0	0	0	2	0	4	0	0	0	0	0.00849
[BMIM][DBPO4]	[BMIM]	[DBPO4]	333.15	0.2303	1	1	4	2	0	0	0	0	0	0	0	0	0	0	0	0	0	0	0	1	0	0	0	0	0	0	0	0	0	0	0	1	0	0	0	0	2	0	4	0	0	0	0	0.00317
[BMIM][DBPO4]	[BMIM]	[DBPO4]	323.15	0.2241	1	1	4	2	0	0	0	0	0	0	0	0	0	0	0	0	0	0	0	1	0	0	0	0	0	0	0	0	0	0	0	1	0	0	0	0	2	0	4	0	0	0	0	0.00372
[BMIM][DBPO4]	[BMIM]	[DBPO4]	313.15	0.2234	1	1	4	2	0	0	0	0	0	0	0	0	0	0	0	0	0	0	0	1	0	0	0	0	0	0	0	0	0	0	0	1	0	0	0	0	2	0	4	0	0	0	0	0.00426
[EMIM][DEPO4]	[EMIM]	[DEPO4]	333.15	1.9884	1	1	2	2	0	0	0	0	0	0	0	0	0	0	0	0	0	0	0	1	0	0	0	0	0	0	0	0	0	0	0	1	0	0	0	0	2	0	2	0	0	0	0	0.02041
[EMIM][DEPO4]	[EMIM]	[DEPO4]	333.15	1.9209	1	1	2	2	0	0	0	0	0	0	0	0	0	0	0	0	0	0	0	1	0	0	0	0	0	0	0	0	0	0	0	1	0	0	0	0	2	0	2	0	0	0	0	0.01962
[EMIM][DEPO4]	[EMIM]	[DEPO4]	323.15	1.8912	1	1	2	2	0	0	0	0	0	0	0	0	0	0	0	0	0	0	0	1	0	0	0	0	0	0	0	0	0	0	0	1	0	0	0	0	2	0	2	0	0	0	0	0.0234
[EMIM][DEPO4]	[EMIM]	[DEPO4]	313.15	1.8905	1	1	2	2	0	0	0	0	0	0	0	0	0	0	0	0	0	0	0	1	0	0	0	0	0	0	0	0	0	0	0	1	0	0	0	0	2	0	2	0	0	0	0	0.02666
[EMIM][DEPO4]	[EMIM]	[DEPO4]	333.15	1.7995	1	1	2	2	0	0	0	0	0	0	0	0	0	0	0	0	0	0	0	1	0	0	0	0	0	0	0	0	0	0	0	1	0	0	0	0	2	0	2	0	0	0	0	0.01852
[EMIM][DEPO4]	[EMIM]	[DEPO4]	323.15	1.752	1	1	2	2	0	0	0	0	0	0	0	0	0	0	0	0	0	0	0	1	0	0	0	0	0	0	0	0	0	0	0	1	0	0	0	0	2	0	2	0	0	0	0	0.0213
[EMIM][DEPO4]	[EMIM]	[DEPO4]	313.15	1.7464	1	1	2	2	0	0	0	0	0	0	0	0	0	0	0	0	0	0	0	1	0	0	0	0	0	0	0	0	0	0	0	1	0	0	0	0	2	0	2	0	0	0	0	0.02475
[EMIM][DEPO4]	[EMIM]	[DEPO4]	333.15	1.5775	1	1	2	2	0	0	0	0	0	0	0	0	0	0	0	0	0	0	0	1	0	0	0	0	0	0	0	0	0	0	0	1	0	0	0	0	2	0	2	0	0	0	0	0.01619
[EMIM][DEPO4]	[EMIM]	[DEPO4]	323.15	1.4879	1	1	2	2	0	0	0	0	0	0	0	0	0	0	0	0	0	0	0	1	0	0	0	0	0	0	0	0	0	0	0	1	0	0	0	0	2	0	2	0	0	0	0	0.01833
[EMIM][DEPO4]	[EMIM]	[DEPO4]	313.15	1.4796	1	1	2	2	0	0	0	0	0	0	0	0	0	0	0	0	0	0	0	1	0	0	0	0	0	0	0	0	0	0	0	1	0	0	0	0	2	0	2	0	0	0	0	0.02138
[EMIM][DEPO4]	[EMIM]	[DEPO4]	333.15	1.3141	1	1	2	2	0	0	0	0	0	0	0	0	0	0	0	0	0	0	0	1	0	0	0	0	0	0	0	0	0	0	0	1	0	0	0	0	2	0	2	0	0	0	0	0.0137
[EMIM][DEPO4]	[EMIM]	[DEPO4]	333.15	1.1114	1	1	2	2	0	0	0	0	0	0	0	0	0	0	0	0	0	0	0	1	0	0	0	0	0	0	0	0	0	0	0	1	0	0	0	0	2	0	2	0	0	0	0	0.01156
[EMIM][DEPO4]	[EMIM]	[DEPO4]	323.15	1.0363	1	1	2	2	0	0	0	0	0	0	0	0	0	0	0	0	0	0	0	1	0	0	0	0	0	0	0	0	0	0	0	1	0	0	0	0	2	0	2	0	0	0	0	0.01241
[EMIM][DEPO4]	[EMIM]	[DEPO4]	313.15	1.0259	1	1	2	2	0	0	0	0	0	0	0	0	0	0	0	0	0	0	0	1	0	0	0	0	0	0	0	0	0	0	0	1	0	0	0	0	2	0	2	0	0	0	0	0.01457
[EMIM][DEPO4]	[EMIM]	[DEPO4]	333.15	0.8632	1	1	2	2	0	0	0	0	0	0	0	0	0	0	0	0	0	0	0	1	0	0	0	0	0	0	0	0	0	0	0	1	0	0	0	0	2	0	2	0	0	0	0	0.00896
[EMIM][DEPO4]	[EMIM]	[DEPO4]	323.15	0.7253	1	1	2	2	0	0	0	0	0	0	0	0	0	0	0	0	0	0	0	1	0	0	0	0	0	0	0	0	0	0	0	1	0	0	0	0	2	0	2	0	0	0	0	0.00865
[EMIM][DEPO4]	[EMIM]	[DEPO4]	313.15	0.7171	1	1	2	2	0	0	0	0	0	0	0	0	0	0	0	0	0	0	0	1	0	0	0	0	0	0	0	0	0	0	0	1	0	0	0	0	2	0	2	0	0	0	0	0.01025
[EMIM][DEPO4]	[EMIM]	[DEPO4]	323.15	0.4613	1	1	2	2	0	0	0	0	0	0	0	0	0	0	0	0	0	0	0	1	0	0	0	0	0	0	0	0	0	0	0	1	0	0	0	0	2	0	2	0	0	0	0	0.00563
[EMIM][DEPO4]	[EMIM]	[DEPO4]	313.15	0.4447	1	1	2	2	0	0	0	0	0	0	0	0	0	0	0	0	0	0	0	1	0	0	0	0	0	0	0	0	0	0	0	1	0	0	0	0	2	0	2	0	0	0	0	0.00631
[EMIM][DEPO4]	[EMIM]	[DEPO4]	333.15	0.4123	1	1	2	2	0	0	0	0	0	0	0	0	0	0	0	0	0	0	0	1	0	0	0	0	0	0	0	0	0	0	0	1	0	0	0	0	2	0	2	0	0	0	0	0.00422
[EMIM][DEPO4]	[EMIM]	[DEPO4]	323.15	0.2572	1	1	2	2	0	0	0	0	0	0	0	0	0	0	0	0	0	0	0	1	0	0	0	0	0	0	0	0	0	0	0	1	0	0	0	0	2	0	2	0	0	0	0	0.00307
[EMIM][DEPO4]	[EMIM]	[DEPO4]	313.15	0.2379	1	1	2	2	0	0	0	0	0	0	0	0	0	0	0	0	0	0	0	1	0	0	0	0	0	0	0	0	0	0	0	1	0	0	0	0	2	0	2	0	0	0	0	0.00328
[MMIM][DMPO4]	[MMIM]	[DMPO4]	333.15	1.7464	1	1	1	2	0	0	0	0	0	0	0	0	0	0	0	0	0	0	0	1	0	0	0	0	0	0	0	0	0	0	0	1	0	0	0	0	2	0	1	0	0	0	0	0.01148
[MMIM][DMPO4]	[MMIM]	[DMPO4]	323.15	1.7395	1	1	1	2	0	0	0	0	0	0	0	0	0	0	0	0	0	0	0	1	0	0	0	0	0	0	0	0	0	0	0	1	0	0	0	0	2	0	1	0	0	0	0	0.01361
[MMIM][DMPO4]	[MMIM]	[DMPO4]	313.15	1.7313	1	1	1	2	0	0	0	0	0	0	0	0	0	0	0	0	0	0	0	1	0	0	0	0	0	0	0	0	0	0	0	1	0	0	0	0	2	0	1	0	0	0	0	0.01597
[MMIM][DMPO4]	[MMIM]	[DMPO4]	333.15	1.4831	1	1	1	2	0	0	0	0	0	0	0	0	0	0	0	0	0	0	0	1	0	0	0	0	0	0	0	0	0	0	0	1	0	0	0	0	2	0	1	0	0	0	0	0.00977
[MMIM][DMPO4]	[MMIM]	[DMPO4]	323.15	1.4671	1	1	1	2	0	0	0	0	0	0	0	0	0	0	0	0	0	0	0	1	0	0	0	0	0	0	0	0	0	0	0	1	0	0	0	0	2	0	1	0	0	0	0	0.01142
[MMIM][DMPO4]	[MMIM]	[DMPO4]	313.15	1.4486	1	1	1	2	0	0	0	0	0	0	0	0	0	0	0	0	0	0	0	1	0	0	0	0	0	0	0	0	0	0	0	1	0	0	0	0	2	0	1	0	0	0	0	0.01347
[MMIM][DMPO4]	[MMIM]	[DMPO4]	333.15	0.9791	1	1	1	2	0	0	0	0	0	0	0	0	0	0	0	0	0	0	0	1	0	0	0	0	0	0	0	0	0	0	0	1	0	0	0	0	2	0	1	0	0	0	0	0.00629
[MMIM][DMPO4]	[MMIM]	[DMPO4]	323.15	0.946	1	1	1	2	0	0	0	0	0	0	0	0	0	0	0	0	0	0	0	1	0	0	0	0	0	0	0	0	0	0	0	1	0	0	0	0	2	0	1	0	0	0	0	0.00741
[MMIM][DMPO4]	[MMIM]	[DMPO4]	313.15	0.9294	1	1	1	2	0	0	0	0	0	0	0	0	0	0	0	0	0	0	0	1	0	0	0	0	0	0	0	0	0	0	0	1	0	0	0	0	2	0	1	0	0	0	0	0.00913
[MMIM][DMPO4]	[MMIM]	[DMPO4]	333.15	0.5626	1	1	1	2	0	0	0	0	0	0	0	0	0	0	0	0	0	0	0	1	0	0	0	0	0	0	0	0	0	0	0	1	0	0	0	0	2	0	1	0	0	0	0	0.00346
[MMIM][DMPO4]	[MMIM]	[DMPO4]	323.15	0.5185	1	1	1	2	0	0	0	0	0	0	0	0	0	0	0	0	0	0	0	1	0	0	0	0	0	0	0	0	0	0	0	1	0	0	0	0	2	0	1	0	0	0	0	0.004
[MMIM][DMPO4]	[MMIM]	[DMPO4]	313.15	0.4881	1	1	1	2	0	0	0	0	0	0	0	0	0	0	0	0	0	0	0	1	0	0	0	0	0	0	0	0	0	0	0	1	0	0	0	0	2	0	1	0	0	0	0	0.00459
[BMIM][Tf2N]	[BMIM]	[Tf2N]	373.15	142.61	1	1	4	2	0	0	0	0	0	0	0	0	0	0	0	0	0	0	0	1	0	0	0	0	0	0	0	0	1	0	0	0	0	0	0	0	2	0	0	1	0	0	0	0.5852
[BMIM][Tf2N]	[BMIM]	[Tf2N]	400.59	140.99	1	1	4	2	0	0	0	0	0	0	0	0	0	0	0	0	0	0	0	1	0	0	0	0	0	0	0	0	1	0	0	0	0	0	0	0	2	0	0	1	0	0	0	0.5257
[BMIM][Tf2N]	[BMIM]	[Tf2N]	415.25	140.23	1	1	4	2	0	0	0	0	0	0	0	0	0	0	0	0	0	0	0	1	0	0	0	0	0	0	0	0	1	0	0	0	0	0	0	0	2	0	0	1	0	0	0	0.4866
[BMIM][Tf2N]	[BMIM]	[Tf2N]	371.59	139.59	1	1	4	2	0	0	0	0	0	0	0	0	0	0	0	0	0	0	0	1	0	0	0	0	0	0	0	0	1	0	0	0	0	0	0	0	2	0	0	1	0	0	0	0.5852
[BMIM][Tf2N]	[BMIM]	[Tf2N]	413.15	137.82	1	1	4	2	0	0	0	0	0	0	0	0	0	0	0	0	0	0	0	1	0	0	0	0	0	0	0	0	1	0	0	0	0	0	0	0	2	0	0	1	0	0	0	0.4866
[BMIM][Tf2N]	[BMIM]	[Tf2N]	410.37	134.73	1	1	4	2	0	0	0	0	0	0	0	0	0	0	0	0	0	0	0	1	0	0	0	0	0	0	0	0	1	0	0	0	0	0	0	0	2	0	0	1	0	0	0	0.4866
[BMIM][Tf2N]	[BMIM]	[Tf2N]	393.15	131.51	1	1	4	2	0	0	0	0	0	0	0	0	0	0	0	0	0	0	0	1	0	0	0	0	0	0	0	0	1	0	0	0	0	0	0	0	2	0	0	1	0	0	0	0.5257
[BMIM][Tf2N]	[BMIM]	[Tf2N]	390.95	128.74	1	1	4	2	0	0	0	0	0	0	0	0	0	0	0	0	0	0	0	1	0	0	0	0	0	0	0	0	1	0	0	0	0	0	0	0	2	0	0	1	0	0	0	0.5257
[BMIM][Tf2N]	[BMIM]	[Tf2N]	361.93	123.04	1	1	4	2	0	0	0	0	0	0	0	0	0	0	0	0	0	0	0	1	0	0	0	0	0	0	0	0	1	0	0	0	0	0	0	0	2	0	0	1	0	0	0	0.5852
[BMIM][Tf2N]	[BMIM]	[Tf2N]	381.11	116.25	1	1	4	2	0	0	0	0	0	0	0	0	0	0	0	0	0	0	0	1	0	0	0	0	0	0	0	0	1	0	0	0	0	0	0	0	2	0	0	1	0	0	0	0.5257
[BMIM][Tf2N]	[BMIM]	[Tf2N]	393.15	115.58	1	1	4	2	0	0	0	0	0	0	0	0	0	0	0	0	0	0	0	1	0	0	0	0	0	0	0	0	1	0	0	0	0	0	0	0	2	0	0	1	0	0	0	0.4866
[BMIM][Tf2N]	[BMIM]	[Tf2N]	390.87	112.73	1	1	4	2	0	0	0	0	0	0	0	0	0	0	0	0	0	0	0	1	0	0	0	0	0	0	0	0	1	0	0	0	0	0	0	0	2	0	0	1	0	0	0	0.4866
[BMIM][Tf2N]	[BMIM]	[Tf2N]	453.15	110.73	1	1	4	2	0	0	0	0	0	0	0	0	0	0	0	0	0	0	0	1	0	0	0	0	0	0	0	0	1	0	0	0	0	0	0	0	2	0	0	1	0	0	0	0.3818
[BMIM][Tf2N]	[BMIM]	[Tf2N]	353.15	108.49	1	1	4	2	0	0	0	0	0	0	0	0	0	0	0	0	0	0	0	1	0	0	0	0	0	0	0	0	1	0	0	0	0	0	0	0	2	0	0	1	0	0	0	0.5852
[BMIM][Tf2N]	[BMIM]	[Tf2N]	449.41	108.33	1	1	4	2	0	0	0	0	0	0	0	0	0	0	0	0	0	0	0	1	0	0	0	0	0	0	0	0	1	0	0	0	0	0	0	0	2	0	0	1	0	0	0	0.3818
[BMIM][Tf2N]	[BMIM]	[Tf2N]	352.11	107.13	1	1	4	2	0	0	0	0	0	0	0	0	0	0	0	0	0	0	0	1	0	0	0	0	0	0	0	0	1	0	0	0	0	0	0	0	2	0	0	1	0	0	0	0.5852
[BMIM][Tf2N]	[BMIM]	[Tf2N]	373.15	106.32	1	1	4	2	0	0	0	0	0	0	0	0	0	0	0	0	0	0	0	1	0	0	0	0	0	0	0	0	1	0	0	0	0	0	0	0	2	0	0	1	0	0	0	0.5257
[BMIM][Tf2N]	[BMIM]	[Tf2N]	371.43	104.25	1	1	4	2	0	0	0	0	0	0	0	0	0	0	0	0	0	0	0	1	0	0	0	0	0	0	0	0	1	0	0	0	0	0	0	0	2	0	0	1	0	0	0	0.5257
[BMIM][Tf2N]	[BMIM]	[Tf2N]	439.65	101.98	1	1	4	2	0	0	0	0	0	0	0	0	0	0	0	0	0	0	0	1	0	0	0	0	0	0	0	0	1	0	0	0	0	0	0	0	2	0	0	1	0	0	0	0.3818
[BMIM][Tf2N]	[BMIM]	[Tf2N]	433.15	97.74	1	1	4	2	0	0	0	0	0	0	0	0	0	0	0	0	0	0	0	1	0	0	0	0	0	0	0	0	1	0	0	0	0	0	0	0	2	0	0	1	0	0	0	0.3818
[BMIM][Tf2N]	[BMIM]	[Tf2N]	429.86	95.48	1	1	4	2	0	0	0	0	0	0	0	0	0	0	0	0	0	0	0	1	0	0	0	0	0	0	0	0	1	0	0	0	0	0	0	0	2	0	0	1	0	0	0	0.3818
[BMIM][Tf2N]	[BMIM]	[Tf2N]	373.15	93.41	1	1	4	2	0	0	0	0	0	0	0	0	0	0	0	0	0	0	0	1	0	0	0	0	0	0	0	0	1	0	0	0	0	0	0	0	2	0	0	1	0	0	0	0.4866
[BMIM][Tf2N]	[BMIM]	[Tf2N]	361.76	92.5	1	1	4	2	0	0	0	0	0	0	0	0	0	0	0	0	0	0	0	1	0	0	0	0	0	0	0	0	1	0	0	0	0	0	0	0	2	0	0	1	0	0	0	0.5257
[BMIM][Tf2N]	[BMIM]	[Tf2N]	342.43	92.13	1	1	4	2	0	0	0	0	0	0	0	0	0	0	0	0	0	0	0	1	0	0	0	0	0	0	0	0	1	0	0	0	0	0	0	0	2	0	0	1	0	0	0	0.5852
[BMIM][Tf2N]	[BMIM]	[Tf2N]	371.46	91.72	1	1	4	2	0	0	0	0	0	0	0	0	0	0	0	0	0	0	0	1	0	0	0	0	0	0	0	0	1	0	0	0	0	0	0	0	2	0	0	1	0	0	0	0.4866
[BMIM][Tf2N]	[BMIM]	[Tf2N]	420.12	89.33	1	1	4	2	0	0	0	0	0	0	0	0	0	0	0	0	0	0	0	1	0	0	0	0	0	0	0	0	1	0	0	0	0	0	0	0	2	0	0	1	0	0	0	0.3818
[BMIM][Tf2N]	[BMIM]	[Tf2N]	413.15	84.35	1	1	4	2	0	0	0	0	0	0	0	0	0	0	0	0	0	0	0	1	0	0	0	0	0	0	0	0	1	0	0	0	0	0	0	0	2	0	0	1	0	0	0	0.3818
[BMIM][Tf2N]	[BMIM]	[Tf2N]	353.15	82.54	1	1	4	2	0	0	0	0	0	0	0	0	0	0	0	0	0	0	0	1	0	0	0	0	0	0	0	0	1	0	0	0	0	0	0	0	2	0	0	1	0	0	0	0.5257
[BMIM][Tf2N]	[BMIM]	[Tf2N]	410.52	82.48	1	1	4	2	0	0	0	0	0	0	0	0	0	0	0	0	0	0	0	1	0	0	0	0	0	0	0	0	1	0	0	0	0	0	0	0	2	0	0	1	0	0	0	0.3818
[BMIM][Tf2N]	[BMIM]	[Tf2N]	352.11	81.24	1	1	4	2	0	0	0	0	0	0	0	0	0	0	0	0	0	0	0	1	0	0	0	0	0	0	0	0	1	0	0	0	0	0	0	0	2	0	0	1	0	0	0	0.5257
[BMIM][Tf2N]	[BMIM]	[Tf2N]	333.15	79.07	1	1	4	2	0	0	0	0	0	0	0	0	0	0	0	0	0	0	0	1	0	0	0	0	0	0	0	0	1	0	0	0	0	0	0	0	2	0	0	1	0	0	0	0.5852
[BMIM][Tf2N]	[BMIM]	[Tf2N]	332.73	78.28	1	1	4	2	0	0	0	0	0	0	0	0	0	0	0	0	0	0	0	1	0	0	0	0	0	0	0	0	1	0	0	0	0	0	0	0	2	0	0	1	0	0	0	0.5852
[BMIM][Tf2N]	[BMIM]	[Tf2N]	400.63	75.93	1	1	4	2	0	0	0	0	0	0	0	0	0	0	0	0	0	0	0	1	0	0	0	0	0	0	0	0	1	0	0	0	0	0	0	0	2	0	0	1	0	0	0	0.3818
[BMIM][Tf2N]	[BMIM]	[Tf2N]	453.15	74.83	1	1	4	2	0	0	0	0	0	0	0	0	0	0	0	0	0	0	0	1	0	0	0	0	0	0	0	0	1	0	0	0	0	0	0	0	2	0	0	1	0	0	0	0.2926
[BMIM][Tf2N]	[BMIM]	[Tf2N]	449.36	73.25	1	1	4	2	0	0	0	0	0	0	0	0	0	0	0	0	0	0	0	1	0	0	0	0	0	0	0	0	1	0	0	0	0	0	0	0	2	0	0	1	0	0	0	0.2926
[BMIM][Tf2N]	[BMIM]	[Tf2N]	353.15	72.34	1	1	4	2	0	0	0	0	0	0	0	0	0	0	0	0	0	0	0	1	0	0	0	0	0	0	0	0	1	0	0	0	0	0	0	0	2	0	0	1	0	0	0	0.4866
[BMIM][Tf2N]	[BMIM]	[Tf2N]	352.1	71.97	1	1	4	2	0	0	0	0	0	0	0	0	0	0	0	0	0	0	0	1	0	0	0	0	0	0	0	0	1	0	0	0	0	0	0	0	2	0	0	1	0	0	0	0.4866
[BMIM][Tf2N]	[BMIM]	[Tf2N]	393.15	70.94	1	1	4	2	0	0	0	0	0	0	0	0	0	0	0	0	0	0	0	1	0	0	0	0	0	0	0	0	1	0	0	0	0	0	0	0	2	0	0	1	0	0	0	0.3818
[BMIM][Tf2N]	[BMIM]	[Tf2N]	342.45	70.74	1	1	4	2	0	0	0	0	0	0	0	0	0	0	0	0	0	0	0	1	0	0	0	0	0	0	0	0	1	0	0	0	0	0	0	0	2	0	0	1	0	0	0	0.5257
[BMIM][Tf2N]	[BMIM]	[Tf2N]	390.91	69.43	1	1	4	2	0	0	0	0	0	0	0	0	0	0	0	0	0	0	0	1	0	0	0	0	0	0	0	0	1	0	0	0	0	0	0	0	2	0	0	1	0	0	0	0.3818
[BMIM][Tf2N]	[BMIM]	[Tf2N]	439.6	69	1	1	4	2	0	0	0	0	0	0	0	0	0	0	0	0	0	0	0	1	0	0	0	0	0	0	0	0	1	0	0	0	0	0	0	0	2	0	0	1	0	0	0	0.2926
[BMIM][Tf2N]	[BMIM]	[Tf2N]	433.15	66.17	1	1	4	2	0	0	0	0	0	0	0	0	0	0	0	0	0	0	0	1	0	0	0	0	0	0	0	0	1	0	0	0	0	0	0	0	2	0	0	1	0	0	0	0.2926
[BMIM][Tf2N]	[BMIM]	[Tf2N]	323.13	65.88	1	1	4	2	0	0	0	0	0	0	0	0	0	0	0	0	0	0	0	1	0	0	0	0	0	0	0	0	1	0	0	0	0	0	0	0	2	0	0	1	0	0	0	0.5852
[BMIM][Tf2N]	[BMIM]	[Tf2N]	429.87	64.75	1	1	4	2	0	0	0	0	0	0	0	0	0	0	0	0	0	0	0	1	0	0	0	0	0	0	0	0	1	0	0	0	0	0	0	0	2	0	0	1	0	0	0	0.2926
[BMIM][Tf2N]	[BMIM]	[Tf2N]	381.25	63.03	1	1	4	2	0	0	0	0	0	0	0	0	0	0	0	0	0	0	0	1	0	0	0	0	0	0	0	0	1	0	0	0	0	0	0	0	2	0	0	1	0	0	0	0.3818
[BMIM][Tf2N]	[BMIM]	[Tf2N]	342.53	61.37	1	1	4	2	0	0	0	0	0	0	0	0	0	0	0	0	0	0	0	1	0	0	0	0	0	0	0	0	1	0	0	0	0	0	0	0	2	0	0	1	0	0	0	0.4866
[BMIM][Tf2N]	[BMIM]	[Tf2N]	333.15	61.19	1	1	4	2	0	0	0	0	0	0	0	0	0	0	0	0	0	0	0	1	0	0	0	0	0	0	0	0	1	0	0	0	0	0	0	0	2	0	0	1	0	0	0	0.5257
[BMIM][Tf2N]	[BMIM]	[Tf2N]	332.79	60.99	1	1	4	2	0	0	0	0	0	0	0	0	0	0	0	0	0	0	0	1	0	0	0	0	0	0	0	0	1	0	0	0	0	0	0	0	2	0	0	1	0	0	0	0.5257
[BMIM][Tf2N]	[BMIM]	[Tf2N]	420.21	60.35	1	1	4	2	0	0	0	0	0	0	0	0	0	0	0	0	0	0	0	1	0	0	0	0	0	0	0	0	1	0	0	0	0	0	0	0	2	0	0	1	0	0	0	0.2926
[BMIM][Tf2N]	[BMIM]	[Tf2N]	373.15	57.89	1	1	4	2	0	0	0	0	0	0	0	0	0	0	0	0	0	0	0	1	0	0	0	0	0	0	0	0	1	0	0	0	0	0	0	0	2	0	0	1	0	0	0	0.3818
[BMIM][Tf2N]	[BMIM]	[Tf2N]	413.15	57.24	1	1	4	2	0	0	0	0	0	0	0	0	0	0	0	0	0	0	0	1	0	0	0	0	0	0	0	0	1	0	0	0	0	0	0	0	2	0	0	1	0	0	0	0.2926
[BMIM][Tf2N]	[BMIM]	[Tf2N]	371.5	56.82	1	1	4	2	0	0	0	0	0	0	0	0	0	0	0	0	0	0	0	1	0	0	0	0	0	0	0	0	1	0	0	0	0	0	0	0	2	0	0	1	0	0	0	0.3818
[BMIM][Tf2N]	[BMIM]	[Tf2N]	410.37	56	1	1	4	2	0	0	0	0	0	0	0	0	0	0	0	0	0	0	0	1	0	0	0	0	0	0	0	0	1	0	0	0	0	0	0	0	2	0	0	1	0	0	0	0.2926
[BMIM][Tf2N]	[BMIM]	[Tf2N]	313.65	55.27	1	1	4	2	0	0	0	0	0	0	0	0	0	0	0	0	0	0	0	1	0	0	0	0	0	0	0	0	1	0	0	0	0	0	0	0	2	0	0	1	0	0	0	0.5852
[BMIM][Tf2N]	[BMIM]	[Tf2N]	313.65	54.83	1	1	4	2	0	0	0	0	0	0	0	0	0	0	0	0	0	0	0	1	0	0	0	0	0	0	0	0	1	0	0	0	0	0	0	0	2	0	0	1	0	0	0	0.5852
[BMIM][Tf2N]	[BMIM]	[Tf2N]	313.15	54.37	1	1	4	2	0	0	0	0	0	0	0	0	0	0	0	0	0	0	0	1	0	0	0	0	0	0	0	0	1	0	0	0	0	0	0	0	2	0	0	1	0	0	0	0.5852
[BMIM][Tf2N]	[BMIM]	[Tf2N]	333.15	53.39	1	1	4	2	0	0	0	0	0	0	0	0	0	0	0	0	0	0	0	1	0	0	0	0	0	0	0	0	1	0	0	0	0	0	0	0	2	0	0	1	0	0	0	0.4866
[BMIM][Tf2N]	[BMIM]	[Tf2N]	332.76	52.89	1	1	4	2	0	0	0	0	0	0	0	0	0	0	0	0	0	0	0	1	0	0	0	0	0	0	0	0	1	0	0	0	0	0	0	0	2	0	0	1	0	0	0	0.4866
[BMIM][Tf2N]	[BMIM]	[Tf2N]	323.15	51.74	1	1	4	2	0	0	0	0	0	0	0	0	0	0	0	0	0	0	0	1	0	0	0	0	0	0	0	0	1	0	0	0	0	0	0	0	2	0	0	1	0	0	0	0.5257
[BMIM][Tf2N]	[BMIM]	[Tf2N]	400.62	51.5	1	1	4	2	0	0	0	0	0	0	0	0	0	0	0	0	0	0	0	1	0	0	0	0	0	0	0	0	1	0	0	0	0	0	0	0	2	0	0	1	0	0	0	0.2926
[BMIM][Tf2N]	[BMIM]	[Tf2N]	361.86	50.82	1	1	4	2	0	0	0	0	0	0	0	0	0	0	0	0	0	0	0	1	0	0	0	0	0	0	0	0	1	0	0	0	0	0	0	0	2	0	0	1	0	0	0	0.3818
[BMIM][Tf2N]	[BMIM]	[Tf2N]	393.15	48.29	1	1	4	2	0	0	0	0	0	0	0	0	0	0	0	0	0	0	0	1	0	0	0	0	0	0	0	0	1	0	0	0	0	0	0	0	2	0	0	1	0	0	0	0.2926
[BMIM][Tf2N]	[BMIM]	[Tf2N]	390.88	47.29	1	1	4	2	0	0	0	0	0	0	0	0	0	0	0	0	0	0	0	1	0	0	0	0	0	0	0	0	1	0	0	0	0	0	0	0	2	0	0	1	0	0	0	0.2926
[BMIM][Tf2N]	[BMIM]	[Tf2N]	353.15	45.57	1	1	4	2	0	0	0	0	0	0	0	0	0	0	0	0	0	0	0	1	0	0	0	0	0	0	0	0	1	0	0	0	0	0	0	0	2	0	0	1	0	0	0	0.3818
[BMIM][Tf2N]	[BMIM]	[Tf2N]	352.12	44.97	1	1	4	2	0	0	0	0	0	0	0	0	0	0	0	0	0	0	0	1	0	0	0	0	0	0	0	0	1	0	0	0	0	0	0	0	2	0	0	1	0	0	0	0.3818
[BMIM][Tf2N]	[BMIM]	[Tf2N]	314.65	44.48	1	1	4	2	0	0	0	0	0	0	0	0	0	0	0	0	0	0	0	1	0	0	0	0	0	0	0	0	1	0	0	0	0	0	0	0	2	0	0	1	0	0	0	0.5257
[BMIM][Tf2N]	[BMIM]	[Tf2N]	313.15	43.31	1	1	4	2	0	0	0	0	0	0	0	0	0	0	0	0	0	0	0	1	0	0	0	0	0	0	0	0	1	0	0	0	0	0	0	0	2	0	0	1	0	0	0	0.5257
[BMIM][Tf2N]	[BMIM]	[Tf2N]	381.22	43.04	1	1	4	2	0	0	0	0	0	0	0	0	0	0	0	0	0	0	0	1	0	0	0	0	0	0	0	0	1	0	0	0	0	0	0	0	2	0	0	1	0	0	0	0.2926
[BMIM][Tf2N]	[BMIM]	[Tf2N]	453.15	42.24	1	1	4	2	0	0	0	0	0	0	0	0	0	0	0	0	0	0	0	1	0	0	0	0	0	0	0	0	1	0	0	0	0	0	0	0	2	0	0	1	0	0	0	0.1886
[BMIM][Tf2N]	[BMIM]	[Tf2N]	449.38	41.33	1	1	4	2	0	0	0	0	0	0	0	0	0	0	0	0	0	0	0	1	0	0	0	0	0	0	0	0	1	0	0	0	0	0	0	0	2	0	0	1	0	0	0	0.1886
[BMIM][Tf2N]	[BMIM]	[Tf2N]	373.15	39.57	1	1	4	2	0	0	0	0	0	0	0	0	0	0	0	0	0	0	0	1	0	0	0	0	0	0	0	0	1	0	0	0	0	0	0	0	2	0	0	1	0	0	0	0.2926
[BMIM][Tf2N]	[BMIM]	[Tf2N]	342.47	39.43	1	1	4	2	0	0	0	0	0	0	0	0	0	0	0	0	0	0	0	1	0	0	0	0	0	0	0	0	1	0	0	0	0	0	0	0	2	0	0	1	0	0	0	0.3818
[BMIM][Tf2N]	[BMIM]	[Tf2N]	371.56	39	1	1	4	2	0	0	0	0	0	0	0	0	0	0	0	0	0	0	0	1	0	0	0	0	0	0	0	0	1	0	0	0	0	0	0	0	2	0	0	1	0	0	0	0.2926
[BMIM][Tf2N]	[BMIM]	[Tf2N]	439.64	38.88	1	1	4	2	0	0	0	0	0	0	0	0	0	0	0	0	0	0	0	1	0	0	0	0	0	0	0	0	1	0	0	0	0	0	0	0	2	0	0	1	0	0	0	0.1886
[BMIM][Tf2N]	[BMIM]	[Tf2N]	313.57	37.99	1	1	4	2	0	0	0	0	0	0	0	0	0	0	0	0	0	0	0	1	0	0	0	0	0	0	0	0	1	0	0	0	0	0	0	0	2	0	0	1	0	0	0	0.4866
[BMIM][Tf2N]	[BMIM]	[Tf2N]	313.15	37.58	1	1	4	2	0	0	0	0	0	0	0	0	0	0	0	0	0	0	0	1	0	0	0	0	0	0	0	0	1	0	0	0	0	0	0	0	2	0	0	1	0	0	0	0.4866
[BMIM][Tf2N]	[BMIM]	[Tf2N]	433.15	37.29	1	1	4	2	0	0	0	0	0	0	0	0	0	0	0	0	0	0	0	1	0	0	0	0	0	0	0	0	1	0	0	0	0	0	0	0	2	0	0	1	0	0	0	0.1886
[BMIM][Tf2N]	[BMIM]	[Tf2N]	429.89	36.48	1	1	4	2	0	0	0	0	0	0	0	0	0	0	0	0	0	0	0	1	0	0	0	0	0	0	0	0	1	0	0	0	0	0	0	0	2	0	0	1	0	0	0	0.1886
[BMIM][Tf2N]	[BMIM]	[Tf2N]	361.77	35	1	1	4	2	0	0	0	0	0	0	0	0	0	0	0	0	0	0	0	1	0	0	0	0	0	0	0	0	1	0	0	0	0	0	0	0	2	0	0	1	0	0	0	0.2926
[BMIM][Tf2N]	[BMIM]	[Tf2N]	333.15	34.37	1	1	4	2	0	0	0	0	0	0	0	0	0	0	0	0	0	0	0	1	0	0	0	0	0	0	0	0	1	0	0	0	0	0	0	0	2	0	0	1	0	0	0	0.3818
[BMIM][Tf2N]	[BMIM]	[Tf2N]	332.77	34.23	1	1	4	2	0	0	0	0	0	0	0	0	0	0	0	0	0	0	0	1	0	0	0	0	0	0	0	0	1	0	0	0	0	0	0	0	2	0	0	1	0	0	0	0.3818
[BMIM][Tf2N]	[BMIM]	[Tf2N]	420.16	33.98	1	1	4	2	0	0	0	0	0	0	0	0	0	0	0	0	0	0	0	1	0	0	0	0	0	0	0	0	1	0	0	0	0	0	0	0	2	0	0	1	0	0	0	0.1886
[BMIM][Tf2N]	[BMIM]	[Tf2N]	413.15	32.25	1	1	4	2	0	0	0	0	0	0	0	0	0	0	0	0	0	0	0	1	0	0	0	0	0	0	0	0	1	0	0	0	0	0	0	0	2	0	0	1	0	0	0	0.1886
[BMIM][Tf2N]	[BMIM]	[Tf2N]	410.37	31.58	1	1	4	2	0	0	0	0	0	0	0	0	0	0	0	0	0	0	0	1	0	0	0	0	0	0	0	0	1	0	0	0	0	0	0	0	2	0	0	1	0	0	0	0.1886
[BMIM][Tf2N]	[BMIM]	[Tf2N]	353.15	31.32	1	1	4	2	0	0	0	0	0	0	0	0	0	0	0	0	0	0	0	1	0	0	0	0	0	0	0	0	1	0	0	0	0	0	0	0	2	0	0	1	0	0	0	0.2926
[BMIM][Tf2N]	[BMIM]	[Tf2N]	352.1	31.05	1	1	4	2	0	0	0	0	0	0	0	0	0	0	0	0	0	0	0	1	0	0	0	0	0	0	0	0	1	0	0	0	0	0	0	0	2	0	0	1	0	0	0	0.2926
[BMIM][Tf2N]	[BMIM]	[Tf2N]	323.08	29.38	1	1	4	2	0	0	0	0	0	0	0	0	0	0	0	0	0	0	0	1	0	0	0	0	0	0	0	0	1	0	0	0	0	0	0	0	2	0	0	1	0	0	0	0.3818
[BMIM][Tf2N]	[BMIM]	[Tf2N]	400.64	29.12	1	1	4	2	0	0	0	0	0	0	0	0	0	0	0	0	0	0	0	1	0	0	0	0	0	0	0	0	1	0	0	0	0	0	0	0	2	0	0	1	0	0	0	0.1886
[BMIM][Tf2N]	[BMIM]	[Tf2N]	393.15	27.25	1	1	4	2	0	0	0	0	0	0	0	0	0	0	0	0	0	0	0	1	0	0	0	0	0	0	0	0	1	0	0	0	0	0	0	0	2	0	0	1	0	0	0	0.1886
[BMIM][Tf2N]	[BMIM]	[Tf2N]	342.55	27	1	1	4	2	0	0	0	0	0	0	0	0	0	0	0	0	0	0	0	1	0	0	0	0	0	0	0	0	1	0	0	0	0	0	0	0	2	0	0	1	0	0	0	0.2926
[BMIM][Tf2N]	[BMIM]	[Tf2N]	390.86	26.68	1	1	4	2	0	0	0	0	0	0	0	0	0	0	0	0	0	0	0	1	0	0	0	0	0	0	0	0	1	0	0	0	0	0	0	0	2	0	0	1	0	0	0	0.1886
[BMIM][Tf2N]	[BMIM]	[Tf2N]	313.5	24.73	1	1	4	2	0	0	0	0	0	0	0	0	0	0	0	0	0	0	0	1	0	0	0	0	0	0	0	0	1	0	0	0	0	0	0	0	2	0	0	1	0	0	0	0.3818
[BMIM][Tf2N]	[BMIM]	[Tf2N]	313.15	24.67	1	1	4	2	0	0	0	0	0	0	0	0	0	0	0	0	0	0	0	1	0	0	0	0	0	0	0	0	1	0	0	0	0	0	0	0	2	0	0	1	0	0	0	0.3818
[BMIM][Tf2N]	[BMIM]	[Tf2N]	380.99	24.33	1	1	4	2	0	0	0	0	0	0	0	0	0	0	0	0	0	0	0	1	0	0	0	0	0	0	0	0	1	0	0	0	0	0	0	0	2	0	0	1	0	0	0	0.1886
[BMIM][Tf2N]	[BMIM]	[Tf2N]	333.15	23.79	1	1	4	2	0	0	0	0	0	0	0	0	0	0	0	0	0	0	0	1	0	0	0	0	0	0	0	0	1	0	0	0	0	0	0	0	2	0	0	1	0	0	0	0.2926
[BMIM][Tf2N]	[BMIM]	[Tf2N]	332.75	23.5	1	1	4	2	0	0	0	0	0	0	0	0	0	0	0	0	0	0	0	1	0	0	0	0	0	0	0	0	1	0	0	0	0	0	0	0	2	0	0	1	0	0	0	0.2926
[BMIM][Tf2N]	[BMIM]	[Tf2N]	373.15	22.41	1	1	4	2	0	0	0	0	0	0	0	0	0	0	0	0	0	0	0	1	0	0	0	0	0	0	0	0	1	0	0	0	0	0	0	0	2	0	0	1	0	0	0	0.1886
[BMIM][Tf2N]	[BMIM]	[Tf2N]	371.43	22.02	1	1	4	2	0	0	0	0	0	0	0	0	0	0	0	0	0	0	0	1	0	0	0	0	0	0	0	0	1	0	0	0	0	0	0	0	2	0	0	1	0	0	0	0.1886
[BMIM][Tf2N]	[BMIM]	[Tf2N]	323.08	20.24	1	1	4	2	0	0	0	0	0	0	0	0	0	0	0	0	0	0	0	1	0	0	0	0	0	0	0	0	1	0	0	0	0	0	0	0	2	0	0	1	0	0	0	0.2926
[BMIM][Tf2N]	[BMIM]	[Tf2N]	361.76	19.72	1	1	4	2	0	0	0	0	0	0	0	0	0	0	0	0	0	0	0	1	0	0	0	0	0	0	0	0	1	0	0	0	0	0	0	0	2	0	0	1	0	0	0	0.1886
[BMIM][Tf2N]	[BMIM]	[Tf2N]	353.15	17.83	1	1	4	2	0	0	0	0	0	0	0	0	0	0	0	0	0	0	0	1	0	0	0	0	0	0	0	0	1	0	0	0	0	0	0	0	2	0	0	1	0	0	0	0.1886
[BMIM][Tf2N]	[BMIM]	[Tf2N]	352.11	17.57	1	1	4	2	0	0	0	0	0	0	0	0	0	0	0	0	0	0	0	1	0	0	0	0	0	0	0	0	1	0	0	0	0	0	0	0	2	0	0	1	0	0	0	0.1886
[BMIM][Tf2N]	[BMIM]	[Tf2N]	453.15	17.41	1	1	4	2	0	0	0	0	0	0	0	0	0	0	0	0	0	0	0	1	0	0	0	0	0	0	0	0	1	0	0	0	0	0	0	0	2	0	0	1	0	0	0	0.0847
[BMIM][Tf2N]	[BMIM]	[Tf2N]	313.58	17.24	1	1	4	2	0	0	0	0	0	0	0	0	0	0	0	0	0	0	0	1	0	0	0	0	0	0	0	0	1	0	0	0	0	0	0	0	2	0	0	1	0	0	0	0.2926
[BMIM][Tf2N]	[BMIM]	[Tf2N]	313.15	17.23	1	1	4	2	0	0	0	0	0	0	0	0	0	0	0	0	0	0	0	1	0	0	0	0	0	0	0	0	1	0	0	0	0	0	0	0	2	0	0	1	0	0	0	0.2926
[BMIM][Tf2N]	[BMIM]	[Tf2N]	449.29	17.03	1	1	4	2	0	0	0	0	0	0	0	0	0	0	0	0	0	0	0	1	0	0	0	0	0	0	0	0	1	0	0	0	0	0	0	0	2	0	0	1	0	0	0	0.0847
[BMIM][Tf2N]	[BMIM]	[Tf2N]	439.54	16.03	1	1	4	2	0	0	0	0	0	0	0	0	0	0	0	0	0	0	0	1	0	0	0	0	0	0	0	0	1	0	0	0	0	0	0	0	2	0	0	1	0	0	0	0.0847
[BMIM][Tf2N]	[BMIM]	[Tf2N]	342.42	15.52	1	1	4	2	0	0	0	0	0	0	0	0	0	0	0	0	0	0	0	1	0	0	0	0	0	0	0	0	1	0	0	0	0	0	0	0	2	0	0	1	0	0	0	0.1886
[BMIM][Tf2N]	[BMIM]	[Tf2N]	433.15	15.39	1	1	4	2	0	0	0	0	0	0	0	0	0	0	0	0	0	0	0	1	0	0	0	0	0	0	0	0	1	0	0	0	0	0	0	0	2	0	0	1	0	0	0	0.0847
[BMIM][Tf2N]	[BMIM]	[Tf2N]	429.98	15.03	1	1	4	2	0	0	0	0	0	0	0	0	0	0	0	0	0	0	0	1	0	0	0	0	0	0	0	0	1	0	0	0	0	0	0	0	2	0	0	1	0	0	0	0.0847
[BMIM][Tf2N]	[BMIM]	[Tf2N]	420.12	14.08	1	1	4	2	0	0	0	0	0	0	0	0	0	0	0	0	0	0	0	1	0	0	0	0	0	0	0	0	1	0	0	0	0	0	0	0	2	0	0	1	0	0	0	0.0847
[BMIM][Tf2N]	[BMIM]	[Tf2N]	333.15	13.63	1	1	4	2	0	0	0	0	0	0	0	0	0	0	0	0	0	0	0	1	0	0	0	0	0	0	0	0	1	0	0	0	0	0	0	0	2	0	0	1	0	0	0	0.1886
[BMIM][Tf2N]	[BMIM]	[Tf2N]	332.74	13.57	1	1	4	2	0	0	0	0	0	0	0	0	0	0	0	0	0	0	0	1	0	0	0	0	0	0	0	0	1	0	0	0	0	0	0	0	2	0	0	1	0	0	0	0.1886
[BMIM][Tf2N]	[BMIM]	[Tf2N]	413.15	13.31	1	1	4	2	0	0	0	0	0	0	0	0	0	0	0	0	0	0	0	1	0	0	0	0	0	0	0	0	1	0	0	0	0	0	0	0	2	0	0	1	0	0	0	0.0847
[BMIM][Tf2N]	[BMIM]	[Tf2N]	410.32	13.03	1	1	4	2	0	0	0	0	0	0	0	0	0	0	0	0	0	0	0	1	0	0	0	0	0	0	0	0	1	0	0	0	0	0	0	0	2	0	0	1	0	0	0	0.0847
[BMIM][Tf2N]	[BMIM]	[Tf2N]	400.58	11.98	1	1	4	2	0	0	0	0	0	0	0	0	0	0	0	0	0	0	0	1	0	0	0	0	0	0	0	0	1	0	0	0	0	0	0	0	2	0	0	1	0	0	0	0.0847
[BMIM][Tf2N]	[BMIM]	[Tf2N]	323.08	11.72	1	1	4	2	0	0	0	0	0	0	0	0	0	0	0	0	0	0	0	1	0	0	0	0	0	0	0	0	1	0	0	0	0	0	0	0	2	0	0	1	0	0	0	0.1886
[BMIM][Tf2N]	[BMIM]	[Tf2N]	393.15	11.23	1	1	4	2	0	0	0	0	0	0	0	0	0	0	0	0	0	0	0	1	0	0	0	0	0	0	0	0	1	0	0	0	0	0	0	0	2	0	0	1	0	0	0	0.0847
[BMIM][Tf2N]	[BMIM]	[Tf2N]	390.67	10.98	1	1	4	2	0	0	0	0	0	0	0	0	0	0	0	0	0	0	0	1	0	0	0	0	0	0	0	0	1	0	0	0	0	0	0	0	2	0	0	1	0	0	0	0.0847
[BMIM][Tf2N]	[BMIM]	[Tf2N]	381.17	10.03	1	1	4	2	0	0	0	0	0	0	0	0	0	0	0	0	0	0	0	1	0	0	0	0	0	0	0	0	1	0	0	0	0	0	0	0	2	0	0	1	0	0	0	0.0847
[BMIM][Tf2N]	[BMIM]	[Tf2N]	313.6	10.02	1	1	4	2	0	0	0	0	0	0	0	0	0	0	0	0	0	0	0	1	0	0	0	0	0	0	0	0	1	0	0	0	0	0	0	0	2	0	0	1	0	0	0	0.1886
[BMIM][Tf2N]	[BMIM]	[Tf2N]	313.15	9.94	1	1	4	2	0	0	0	0	0	0	0	0	0	0	0	0	0	0	0	1	0	0	0	0	0	0	0	0	1	0	0	0	0	0	0	0	2	0	0	1	0	0	0	0.1886
[BMIM][Tf2N]	[BMIM]	[Tf2N]	373.15	9.22	1	1	4	2	0	0	0	0	0	0	0	0	0	0	0	0	0	0	0	1	0	0	0	0	0	0	0	0	1	0	0	0	0	0	0	0	2	0	0	1	0	0	0	0.0847
[BMIM][Tf2N]	[BMIM]	[Tf2N]	371.5	9.03	1	1	4	2	0	0	0	0	0	0	0	0	0	0	0	0	0	0	0	1	0	0	0	0	0	0	0	0	1	0	0	0	0	0	0	0	2	0	0	1	0	0	0	0.0847
[BMIM][Tf2N]	[BMIM]	[Tf2N]	361.82	8.13	1	1	4	2	0	0	0	0	0	0	0	0	0	0	0	0	0	0	0	1	0	0	0	0	0	0	0	0	1	0	0	0	0	0	0	0	2	0	0	1	0	0	0	0.0847
[BMIM][Tf2N]	[BMIM]	[Tf2N]	353.15	7.34	1	1	4	2	0	0	0	0	0	0	0	0	0	0	0	0	0	0	0	1	0	0	0	0	0	0	0	0	1	0	0	0	0	0	0	0	2	0	0	1	0	0	0	0.0847
[BMIM][Tf2N]	[BMIM]	[Tf2N]	352.13	7.23	1	1	4	2	0	0	0	0	0	0	0	0	0	0	0	0	0	0	0	1	0	0	0	0	0	0	0	0	1	0	0	0	0	0	0	0	2	0	0	1	0	0	0	0.0847
[BMIM][Tf2N]	[BMIM]	[Tf2N]	342.43	6.48	1	1	4	2	0	0	0	0	0	0	0	0	0	0	0	0	0	0	0	1	0	0	0	0	0	0	0	0	1	0	0	0	0	0	0	0	2	0	0	1	0	0	0	0.0847
[BMIM][Tf2N]	[BMIM]	[Tf2N]	333.15	5.64	1	1	4	2	0	0	0	0	0	0	0	0	0	0	0	0	0	0	0	1	0	0	0	0	0	0	0	0	1	0	0	0	0	0	0	0	2	0	0	1	0	0	0	0.0847
[BMIM][Tf2N]	[BMIM]	[Tf2N]	332.73	5.58	1	1	4	2	0	0	0	0	0	0	0	0	0	0	0	0	0	0	0	1	0	0	0	0	0	0	0	0	1	0	0	0	0	0	0	0	2	0	0	1	0	0	0	0.0847
[BMIM][Tf2N]	[BMIM]	[Tf2N]	323.08	4.88	1	1	4	2	0	0	0	0	0	0	0	0	0	0	0	0	0	0	0	1	0	0	0	0	0	0	0	0	1	0	0	0	0	0	0	0	2	0	0	1	0	0	0	0.0847
[BMIM][Tf2N]	[BMIM]	[Tf2N]	313.55	4.22	1	1	4	2	0	0	0	0	0	0	0	0	0	0	0	0	0	0	0	1	0	0	0	0	0	0	0	0	1	0	0	0	0	0	0	0	2	0	0	1	0	0	0	0.0847
[BMIM][Tf2N]	[BMIM]	[Tf2N]	313.15	4.2	1	1	4	2	0	0	0	0	0	0	0	0	0	0	0	0	0	0	0	1	0	0	0	0	0	0	0	0	1	0	0	0	0	0	0	0	2	0	0	1	0	0	0	0.0847
[BMIM][DCA]	[BMIM]	[DCA]	313.17	467.49	1	1	4	2	0	0	0	0	0	0	0	0	0	0	0	0	0	0	0	1	0	0	0	1	0	0	0	0	0	0	0	0	0	1	0	0	2	0	0	0	0	0	0	0.601
[BMIM][DCA]	[BMIM]	[DCA]	303.14	398.66	1	1	4	2	0	0	0	0	0	0	0	0	0	0	0	0	0	0	0	1	0	0	0	1	0	0	0	0	0	0	0	0	0	1	0	0	2	0	0	0	0	0	0	0.601
[BMIM][DCA]	[BMIM]	[DCA]	293.41	326.06	1	1	4	2	0	0	0	0	0	0	0	0	0	0	0	0	0	0	0	1	0	0	0	1	0	0	0	0	0	0	0	0	0	1	0	0	2	0	0	0	0	0	0	0.601
[BMIM][DCA]	[BMIM]	[DCA]	363.2	295.83	1	1	4	2	0	0	0	0	0	0	0	0	0	0	0	0	0	0	0	1	0	0	0	1	0	0	0	0	0	0	0	0	0	1	0	0	2	0	0	0	0	0	0	0.507
[BMIM][DCA]	[BMIM]	[DCA]	353.01	257.59	1	1	4	2	0	0	0	0	0	0	0	0	0	0	0	0	0	0	0	1	0	0	0	1	0	0	0	0	0	0	0	0	0	1	0	0	2	0	0	0	0	0	0	0.507
[BMIM][DCA]	[BMIM]	[DCA]	343.12	217.5	1	1	4	2	0	0	0	0	0	0	0	0	0	0	0	0	0	0	0	1	0	0	0	1	0	0	0	0	0	0	0	0	0	1	0	0	2	0	0	0	0	0	0	0.507
[BMIM][DCA]	[BMIM]	[DCA]	333.21	175.66	1	1	4	2	0	0	0	0	0	0	0	0	0	0	0	0	0	0	0	1	0	0	0	1	0	0	0	0	0	0	0	0	0	1	0	0	2	0	0	0	0	0	0	0.507
[BMIM][DCA]	[BMIM]	[DCA]	322.93	131.84	1	1	4	2	0	0	0	0	0	0	0	0	0	0	0	0	0	0	0	1	0	0	0	1	0	0	0	0	0	0	0	0	0	1	0	0	2	0	0	0	0	0	0	0.507
[BMIM][DCA]	[BMIM]	[DCA]	363.18	131.06	1	1	4	2	0	0	0	0	0	0	0	0	0	0	0	0	0	0	0	1	0	0	0	1	0	0	0	0	0	0	0	0	0	1	0	0	2	0	0	0	0	0	0	0.41
[BMIM][DCA]	[BMIM]	[DCA]	353.13	111.66	1	1	4	2	0	0	0	0	0	0	0	0	0	0	0	0	0	0	0	1	0	0	0	1	0	0	0	0	0	0	0	0	0	1	0	0	2	0	0	0	0	0	0	0.41
[BMIM][DCA]	[BMIM]	[DCA]	343.01	94.52	1	1	4	2	0	0	0	0	0	0	0	0	0	0	0	0	0	0	0	1	0	0	0	1	0	0	0	0	0	0	0	0	0	1	0	0	2	0	0	0	0	0	0	0.41
[BMIM][DCA]	[BMIM]	[DCA]	313.03	88.56	1	1	4	2	0	0	0	0	0	0	0	0	0	0	0	0	0	0	0	1	0	0	0	1	0	0	0	0	0	0	0	0	0	1	0	0	2	0	0	0	0	0	0	0.507
[BMIM][DCA]	[BMIM]	[DCA]	363.11	77.76	1	1	4	2	0	0	0	0	0	0	0	0	0	0	0	0	0	0	0	1	0	0	0	1	0	0	0	0	0	0	0	0	0	1	0	0	2	0	0	0	0	0	0	0.3
[BMIM][DCA]	[BMIM]	[DCA]	333.13	77.43	1	1	4	2	0	0	0	0	0	0	0	0	0	0	0	0	0	0	0	1	0	0	0	1	0	0	0	0	0	0	0	0	0	1	0	0	2	0	0	0	0	0	0	0.41
[BMIM][DCA]	[BMIM]	[DCA]	353.1	67.22	1	1	4	2	0	0	0	0	0	0	0	0	0	0	0	0	0	0	0	1	0	0	0	1	0	0	0	0	0	0	0	0	0	1	0	0	2	0	0	0	0	0	0	0.3
[BMIM][DCA]	[BMIM]	[DCA]	323.47	63.95	1	1	4	2	0	0	0	0	0	0	0	0	0	0	0	0	0	0	0	1	0	0	0	1	0	0	0	0	0	0	0	0	0	1	0	0	2	0	0	0	0	0	0	0.41
[BMIM][DCA]	[BMIM]	[DCA]	302.91	60.56	1	1	4	2	0	0	0	0	0	0	0	0	0	0	0	0	0	0	0	1	0	0	0	1	0	0	0	0	0	0	0	0	0	1	0	0	2	0	0	0	0	0	0	0.507
[BMIM][DCA]	[BMIM]	[DCA]	343.34	57.76	1	1	4	2	0	0	0	0	0	0	0	0	0	0	0	0	0	0	0	1	0	0	0	1	0	0	0	0	0	0	0	0	0	1	0	0	2	0	0	0	0	0	0	0.3
[BMIM][DCA]	[BMIM]	[DCA]	313.32	50.88	1	1	4	2	0	0	0	0	0	0	0	0	0	0	0	0	0	0	0	1	0	0	0	1	0	0	0	0	0	0	0	0	0	1	0	0	2	0	0	0	0	0	0	0.41
[BMIM][DCA]	[BMIM]	[DCA]	333.28	48.6	1	1	4	2	0	0	0	0	0	0	0	0	0	0	0	0	0	0	0	1	0	0	0	1	0	0	0	0	0	0	0	0	0	1	0	0	2	0	0	0	0	0	0	0.3
[BMIM][DCA]	[BMIM]	[DCA]	293.44	44.96	1	1	4	2	0	0	0	0	0	0	0	0	0	0	0	0	0	0	0	1	0	0	0	1	0	0	0	0	0	0	0	0	0	1	0	0	2	0	0	0	0	0	0	0.507
[BMIM][DCA]	[BMIM]	[DCA]	363.25	43.28	1	1	4	2	0	0	0	0	0	0	0	0	0	0	0	0	0	0	0	1	0	0	0	1	0	0	0	0	0	0	0	0	0	1	0	0	2	0	0	0	0	0	0	0.2
[BMIM][DCA]	[BMIM]	[DCA]	323.04	40.05	1	1	4	2	0	0	0	0	0	0	0	0	0	0	0	0	0	0	0	1	0	0	0	1	0	0	0	0	0	0	0	0	0	1	0	0	2	0	0	0	0	0	0	0.3
[BMIM][DCA]	[BMIM]	[DCA]	303.45	39.5	1	1	4	2	0	0	0	0	0	0	0	0	0	0	0	0	0	0	0	1	0	0	0	1	0	0	0	0	0	0	0	0	0	1	0	0	2	0	0	0	0	0	0	0.41
[BMIM][DCA]	[BMIM]	[DCA]	353.09	37.45	1	1	4	2	0	0	0	0	0	0	0	0	0	0	0	0	0	0	0	1	0	0	0	1	0	0	0	0	0	0	0	0	0	1	0	0	2	0	0	0	0	0	0	0.2
[BMIM][DCA]	[BMIM]	[DCA]	313.06	32.3	1	1	4	2	0	0	0	0	0	0	0	0	0	0	0	0	0	0	0	1	0	0	0	1	0	0	0	0	0	0	0	0	0	1	0	0	2	0	0	0	0	0	0	0.3
[BMIM][DCA]	[BMIM]	[DCA]	343.12	31.08	1	1	4	2	0	0	0	0	0	0	0	0	0	0	0	0	0	0	0	1	0	0	0	1	0	0	0	0	0	0	0	0	0	1	0	0	2	0	0	0	0	0	0	0.2
[BMIM][DCA]	[BMIM]	[DCA]	293.38	30.15	1	1	4	2	0	0	0	0	0	0	0	0	0	0	0	0	0	0	0	1	0	0	0	1	0	0	0	0	0	0	0	0	0	1	0	0	2	0	0	0	0	0	0	0.41
[BMIM][DCA]	[BMIM]	[DCA]	332.72	26.44	1	1	4	2	0	0	0	0	0	0	0	0	0	0	0	0	0	0	0	1	0	0	0	1	0	0	0	0	0	0	0	0	0	1	0	0	2	0	0	0	0	0	0	0.2
[BMIM][DCA]	[BMIM]	[DCA]	303.4	25.9	1	1	4	2	0	0	0	0	0	0	0	0	0	0	0	0	0	0	0	1	0	0	0	1	0	0	0	0	0	0	0	0	0	1	0	0	2	0	0	0	0	0	0	0.3
[BMIM][DCA]	[BMIM]	[DCA]	322.94	22.6	1	1	4	2	0	0	0	0	0	0	0	0	0	0	0	0	0	0	0	1	0	0	0	1	0	0	0	0	0	0	0	0	0	1	0	0	2	0	0	0	0	0	0	0.2
[BMIM][DCA]	[BMIM]	[DCA]	293.5	19.8	1	1	4	2	0	0	0	0	0	0	0	0	0	0	0	0	0	0	0	1	0	0	0	1	0	0	0	0	0	0	0	0	0	1	0	0	2	0	0	0	0	0	0	0.3
[BMIM][DCA]	[BMIM]	[DCA]	313.36	17.71	1	1	4	2	0	0	0	0	0	0	0	0	0	0	0	0	0	0	0	1	0	0	0	1	0	0	0	0	0	0	0	0	0	1	0	0	2	0	0	0	0	0	0	0.2
[BMIM][DCA]	[BMIM]	[DCA]	303.45	13.6	1	1	4	2	0	0	0	0	0	0	0	0	0	0	0	0	0	0	0	1	0	0	0	1	0	0	0	0	0	0	0	0	0	1	0	0	2	0	0	0	0	0	0	0.2
[BMIM][DCA]	[BMIM]	[DCA]	293.36	10.18	1	1	4	2	0	0	0	0	0	0	0	0	0	0	0	0	0	0	0	1	0	0	0	1	0	0	0	0	0	0	0	0	0	1	0	0	2	0	0	0	0	0	0	0.2
[BMIM][Tf2N]	[BMIM]	[Tf2N]	323.3	499.9	1	1	4	2	0	0	0	0	0	0	0	0	0	0	0	0	0	0	0	1	0	0	0	0	0	0	0	0	1	0	0	0	0	0	0	0	2	0	0	1	0	0	0	0.801
[BMIM][Tf2N]	[BMIM]	[Tf2N]	363.25	460.1	1	1	4	2	0	0	0	0	0	0	0	0	0	0	0	0	0	0	0	1	0	0	0	0	0	0	0	0	1	0	0	0	0	0	0	0	2	0	0	1	0	0	0	0.771
[BMIM][Tf2N]	[BMIM]	[Tf2N]	313.25	447.4	1	1	4	2	0	0	0	0	0	0	0	0	0	0	0	0	0	0	0	1	0	0	0	0	0	0	0	0	1	0	0	0	0	0	0	0	2	0	0	1	0	0	0	0.801
[BMIM][Tf2N]	[BMIM]	[Tf2N]	353.22	420.3	1	1	4	2	0	0	0	0	0	0	0	0	0	0	0	0	0	0	0	1	0	0	0	0	0	0	0	0	1	0	0	0	0	0	0	0	2	0	0	1	0	0	0	0.771
[BMIM][Tf2N]	[BMIM]	[Tf2N]	303.19	393.73	1	1	4	2	0	0	0	0	0	0	0	0	0	0	0	0	0	0	0	1	0	0	0	0	0	0	0	0	1	0	0	0	0	0	0	0	2	0	0	1	0	0	0	0.801
[BMIM][Tf2N]	[BMIM]	[Tf2N]	343.08	380.81	1	1	4	2	0	0	0	0	0	0	0	0	0	0	0	0	0	0	0	1	0	0	0	0	0	0	0	0	1	0	0	0	0	0	0	0	2	0	0	1	0	0	0	0.771
[BMIM][Tf2N]	[BMIM]	[Tf2N]	363.18	363.65	1	1	4	2	0	0	0	0	0	0	0	0	0	0	0	0	0	0	0	1	0	0	0	0	0	0	0	0	1	0	0	0	0	0	0	0	2	0	0	1	0	0	0	0.749
[BMIM][Tf2N]	[BMIM]	[Tf2N]	333.28	336.93	1	1	4	2	0	0	0	0	0	0	0	0	0	0	0	0	0	0	0	1	0	0	0	0	0	0	0	0	1	0	0	0	0	0	0	0	2	0	0	1	0	0	0	0.771
[BMIM][Tf2N]	[BMIM]	[Tf2N]	293.26	332.63	1	1	4	2	0	0	0	0	0	0	0	0	0	0	0	0	0	0	0	1	0	0	0	0	0	0	0	0	1	0	0	0	0	0	0	0	2	0	0	1	0	0	0	0.801
[BMIM][Tf2N]	[BMIM]	[Tf2N]	353.09	332.19	1	1	4	2	0	0	0	0	0	0	0	0	0	0	0	0	0	0	0	1	0	0	0	0	0	0	0	0	1	0	0	0	0	0	0	0	2	0	0	1	0	0	0	0.749
[BMIM][Tf2N]	[BMIM]	[Tf2N]	343.2	292.05	1	1	4	2	0	0	0	0	0	0	0	0	0	0	0	0	0	0	0	1	0	0	0	0	0	0	0	0	1	0	0	0	0	0	0	0	2	0	0	1	0	0	0	0.749
[BMIM][Tf2N]	[BMIM]	[Tf2N]	323.13	289.6	1	1	4	2	0	0	0	0	0	0	0	0	0	0	0	0	0	0	0	1	0	0	0	0	0	0	0	0	1	0	0	0	0	0	0	0	2	0	0	1	0	0	0	0.771
[BMIM][Tf2N]	[BMIM]	[Tf2N]	333.17	251.24	1	1	4	2	0	0	0	0	0	0	0	0	0	0	0	0	0	0	0	1	0	0	0	0	0	0	0	0	1	0	0	0	0	0	0	0	2	0	0	1	0	0	0	0.749
[BMIM][Tf2N]	[BMIM]	[Tf2N]	313.23	239.43	1	1	4	2	0	0	0	0	0	0	0	0	0	0	0	0	0	0	0	1	0	0	0	0	0	0	0	0	1	0	0	0	0	0	0	0	2	0	0	1	0	0	0	0.771
[BMIM][Tf2N]	[BMIM]	[Tf2N]	362.99	224.68	1	1	4	2	0	0	0	0	0	0	0	0	0	0	0	0	0	0	0	1	0	0	0	0	0	0	0	0	1	0	0	0	0	0	0	0	2	0	0	1	0	0	0	0.701
[BMIM][Tf2N]	[BMIM]	[Tf2N]	323.11	205.43	1	1	4	2	0	0	0	0	0	0	0	0	0	0	0	0	0	0	0	1	0	0	0	0	0	0	0	0	1	0	0	0	0	0	0	0	2	0	0	1	0	0	0	0.749
[BMIM][Tf2N]	[BMIM]	[Tf2N]	353.14	194.37	1	1	4	2	0	0	0	0	0	0	0	0	0	0	0	0	0	0	0	1	0	0	0	0	0	0	0	0	1	0	0	0	0	0	0	0	2	0	0	1	0	0	0	0.701
[BMIM][Tf2N]	[BMIM]	[Tf2N]	303.31	187.26	1	1	4	2	0	0	0	0	0	0	0	0	0	0	0	0	0	0	0	1	0	0	0	0	0	0	0	0	1	0	0	0	0	0	0	0	2	0	0	1	0	0	0	0.771
[BMIM][Tf2N]	[BMIM]	[Tf2N]	343.25	161.44	1	1	4	2	0	0	0	0	0	0	0	0	0	0	0	0	0	0	0	1	0	0	0	0	0	0	0	0	1	0	0	0	0	0	0	0	2	0	0	1	0	0	0	0.701
[BMIM][Tf2N]	[BMIM]	[Tf2N]	313.12	158.1	1	1	4	2	0	0	0	0	0	0	0	0	0	0	0	0	0	0	0	1	0	0	0	0	0	0	0	0	1	0	0	0	0	0	0	0	2	0	0	1	0	0	0	0.749
[BMIM][Tf2N]	[BMIM]	[Tf2N]	333.1	131.5	1	1	4	2	0	0	0	0	0	0	0	0	0	0	0	0	0	0	0	1	0	0	0	0	0	0	0	0	1	0	0	0	0	0	0	0	2	0	0	1	0	0	0	0.701
[BMIM][Tf2N]	[BMIM]	[Tf2N]	293.42	128.29	1	1	4	2	0	0	0	0	0	0	0	0	0	0	0	0	0	0	0	1	0	0	0	0	0	0	0	0	1	0	0	0	0	0	0	0	2	0	0	1	0	0	0	0.771
[BMIM][Tf2N]	[BMIM]	[Tf2N]	363.23	117.76	1	1	4	2	0	0	0	0	0	0	0	0	0	0	0	0	0	0	0	1	0	0	0	0	0	0	0	0	1	0	0	0	0	0	0	0	2	0	0	1	0	0	0	0.602
[BMIM][Tf2N]	[BMIM]	[Tf2N]	303.19	108.12	1	1	4	2	0	0	0	0	0	0	0	0	0	0	0	0	0	0	0	1	0	0	0	0	0	0	0	0	1	0	0	0	0	0	0	0	2	0	0	1	0	0	0	0.749
[BMIM][Tf2N]	[BMIM]	[Tf2N]	323.09	102.15	1	1	4	2	0	0	0	0	0	0	0	0	0	0	0	0	0	0	0	1	0	0	0	0	0	0	0	0	1	0	0	0	0	0	0	0	2	0	0	1	0	0	0	0.701
[BMIM][Tf2N]	[BMIM]	[Tf2N]	353.2	101.96	1	1	4	2	0	0	0	0	0	0	0	0	0	0	0	0	0	0	0	1	0	0	0	0	0	0	0	0	1	0	0	0	0	0	0	0	2	0	0	1	0	0	0	0.602
[BMIM][Tf2N]	[BMIM]	[Tf2N]	343.02	86.75	1	1	4	2	0	0	0	0	0	0	0	0	0	0	0	0	0	0	0	1	0	0	0	0	0	0	0	0	1	0	0	0	0	0	0	0	2	0	0	1	0	0	0	0.602
[BMIM][Tf2N]	[BMIM]	[Tf2N]	313.11	78.6	1	1	4	2	0	0	0	0	0	0	0	0	0	0	0	0	0	0	0	1	0	0	0	0	0	0	0	0	1	0	0	0	0	0	0	0	2	0	0	1	0	0	0	0.701
[BMIM][Tf2N]	[BMIM]	[Tf2N]	363.18	73.72	1	1	4	2	0	0	0	0	0	0	0	0	0	0	0	0	0	0	0	1	0	0	0	0	0	0	0	0	1	0	0	0	0	0	0	0	2	0	0	1	0	0	0	0.503
[BMIM][Tf2N]	[BMIM]	[Tf2N]	333.2	72.69	1	1	4	2	0	0	0	0	0	0	0	0	0	0	0	0	0	0	0	1	0	0	0	0	0	0	0	0	1	0	0	0	0	0	0	0	2	0	0	1	0	0	0	0.602
[BMIM][Tf2N]	[BMIM]	[Tf2N]	353.17	64.12	1	1	4	2	0	0	0	0	0	0	0	0	0	0	0	0	0	0	0	1	0	0	0	0	0	0	0	0	1	0	0	0	0	0	0	0	2	0	0	1	0	0	0	0.503
[BMIM][Tf2N]	[BMIM]	[Tf2N]	323.13	60.15	1	1	4	2	0	0	0	0	0	0	0	0	0	0	0	0	0	0	0	1	0	0	0	0	0	0	0	0	1	0	0	0	0	0	0	0	2	0	0	1	0	0	0	0.602
[BMIM][Tf2N]	[BMIM]	[Tf2N]	293.32	59.07	1	1	4	2	0	0	0	0	0	0	0	0	0	0	0	0	0	0	0	1	0	0	0	0	0	0	0	0	1	0	0	0	0	0	0	0	2	0	0	1	0	0	0	0.749
[BMIM][Tf2N]	[BMIM]	[Tf2N]	303.19	58.8	1	1	4	2	0	0	0	0	0	0	0	0	0	0	0	0	0	0	0	1	0	0	0	0	0	0	0	0	1	0	0	0	0	0	0	0	2	0	0	1	0	0	0	0.701
[BMIM][Tf2N]	[BMIM]	[Tf2N]	343.24	54.99	1	1	4	2	0	0	0	0	0	0	0	0	0	0	0	0	0	0	0	1	0	0	0	0	0	0	0	0	1	0	0	0	0	0	0	0	2	0	0	1	0	0	0	0.503
[BMIM][Tf2N]	[BMIM]	[Tf2N]	363.17	51.56	1	1	4	2	0	0	0	0	0	0	0	0	0	0	0	0	0	0	0	1	0	0	0	0	0	0	0	0	1	0	0	0	0	0	0	0	2	0	0	1	0	0	0	0.404
[BMIM][Tf2N]	[BMIM]	[Tf2N]	313.13	49.12	1	1	4	2	0	0	0	0	0	0	0	0	0	0	0	0	0	0	0	1	0	0	0	0	0	0	0	0	1	0	0	0	0	0	0	0	2	0	0	1	0	0	0	0.602
[BMIM][Tf2N]	[BMIM]	[Tf2N]	333.12	46.7	1	1	4	2	0	0	0	0	0	0	0	0	0	0	0	0	0	0	0	1	0	0	0	0	0	0	0	0	1	0	0	0	0	0	0	0	2	0	0	1	0	0	0	0.503
[BMIM][Tf2N]	[BMIM]	[Tf2N]	353.12	45.12	1	1	4	2	0	0	0	0	0	0	0	0	0	0	0	0	0	0	0	1	0	0	0	0	0	0	0	0	1	0	0	0	0	0	0	0	2	0	0	1	0	0	0	0.404
[BMIM][Tf2N]	[BMIM]	[Tf2N]	293.37	44.33	1	1	4	2	0	0	0	0	0	0	0	0	0	0	0	0	0	0	0	1	0	0	0	0	0	0	0	0	1	0	0	0	0	0	0	0	2	0	0	1	0	0	0	0.701
[BMIM][Tf2N]	[BMIM]	[Tf2N]	303.31	39.62	1	1	4	2	0	0	0	0	0	0	0	0	0	0	0	0	0	0	0	1	0	0	0	0	0	0	0	0	1	0	0	0	0	0	0	0	2	0	0	1	0	0	0	0.602
[BMIM][Tf2N]	[BMIM]	[Tf2N]	323.2	39.09	1	1	4	2	0	0	0	0	0	0	0	0	0	0	0	0	0	0	0	1	0	0	0	0	0	0	0	0	1	0	0	0	0	0	0	0	2	0	0	1	0	0	0	0.503
[BMIM][Tf2N]	[BMIM]	[Tf2N]	343.11	38.97	1	1	4	2	0	0	0	0	0	0	0	0	0	0	0	0	0	0	0	1	0	0	0	0	0	0	0	0	1	0	0	0	0	0	0	0	2	0	0	1	0	0	0	0.404
[BMIM][Tf2N]	[BMIM]	[Tf2N]	363.19	35.79	1	1	4	2	0	0	0	0	0	0	0	0	0	0	0	0	0	0	0	1	0	0	0	0	0	0	0	0	1	0	0	0	0	0	0	0	2	0	0	1	0	0	0	0.319
[BMIM][Tf2N]	[BMIM]	[Tf2N]	333.23	33.16	1	1	4	2	0	0	0	0	0	0	0	0	0	0	0	0	0	0	0	1	0	0	0	0	0	0	0	0	1	0	0	0	0	0	0	0	2	0	0	1	0	0	0	0.404
[BMIM][Tf2N]	[BMIM]	[Tf2N]	313.1	31.96	1	1	4	2	0	0	0	0	0	0	0	0	0	0	0	0	0	0	0	1	0	0	0	0	0	0	0	0	1	0	0	0	0	0	0	0	2	0	0	1	0	0	0	0.503
[BMIM][Tf2N]	[BMIM]	[Tf2N]	353.09	31.21	1	1	4	2	0	0	0	0	0	0	0	0	0	0	0	0	0	0	0	1	0	0	0	0	0	0	0	0	1	0	0	0	0	0	0	0	2	0	0	1	0	0	0	0.319
[BMIM][Tf2N]	[BMIM]	[Tf2N]	293.27	30.52	1	1	4	2	0	0	0	0	0	0	0	0	0	0	0	0	0	0	0	1	0	0	0	0	0	0	0	0	1	0	0	0	0	0	0	0	2	0	0	1	0	0	0	0.602
[BMIM][Tf2N]	[BMIM]	[Tf2N]	323.26	27.87	1	1	4	2	0	0	0	0	0	0	0	0	0	0	0	0	0	0	0	1	0	0	0	0	0	0	0	0	1	0	0	0	0	0	0	0	2	0	0	1	0	0	0	0.404
[BMIM][Tf2N]	[BMIM]	[Tf2N]	342.87	26.82	1	1	4	2	0	0	0	0	0	0	0	0	0	0	0	0	0	0	0	1	0	0	0	0	0	0	0	0	1	0	0	0	0	0	0	0	2	0	0	1	0	0	0	0.319
[BMIM][Tf2N]	[BMIM]	[Tf2N]	303.12	25.68	1	1	4	2	0	0	0	0	0	0	0	0	0	0	0	0	0	0	0	1	0	0	0	0	0	0	0	0	1	0	0	0	0	0	0	0	2	0	0	1	0	0	0	0.503
[BMIM][Tf2N]	[BMIM]	[Tf2N]	363.26	24.85	1	1	4	2	0	0	0	0	0	0	0	0	0	0	0	0	0	0	0	1	0	0	0	0	0	0	0	0	1	0	0	0	0	0	0	0	2	0	0	1	0	0	0	0.231
[BMIM][Tf2N]	[BMIM]	[Tf2N]	333.17	22.83	1	1	4	2	0	0	0	0	0	0	0	0	0	0	0	0	0	0	0	1	0	0	0	0	0	0	0	0	1	0	0	0	0	0	0	0	2	0	0	1	0	0	0	0.319
[BMIM][Tf2N]	[BMIM]	[Tf2N]	313.17	22.73	1	1	4	2	0	0	0	0	0	0	0	0	0	0	0	0	0	0	0	1	0	0	0	0	0	0	0	0	1	0	0	0	0	0	0	0	2	0	0	1	0	0	0	0.404
[BMIM][Tf2N]	[BMIM]	[Tf2N]	353.2	21.79	1	1	4	2	0	0	0	0	0	0	0	0	0	0	0	0	0	0	0	1	0	0	0	0	0	0	0	0	1	0	0	0	0	0	0	0	2	0	0	1	0	0	0	0.231
[BMIM][Tf2N]	[BMIM]	[Tf2N]	293.22	19.97	1	1	4	2	0	0	0	0	0	0	0	0	0	0	0	0	0	0	0	1	0	0	0	0	0	0	0	0	1	0	0	0	0	0	0	0	2	0	0	1	0	0	0	0.503
[BMIM][Tf2N]	[BMIM]	[Tf2N]	323.27	18.92	1	1	4	2	0	0	0	0	0	0	0	0	0	0	0	0	0	0	0	1	0	0	0	0	0	0	0	0	1	0	0	0	0	0	0	0	2	0	0	1	0	0	0	0.319
[BMIM][Tf2N]	[BMIM]	[Tf2N]	343	18.74	1	1	4	2	0	0	0	0	0	0	0	0	0	0	0	0	0	0	0	1	0	0	0	0	0	0	0	0	1	0	0	0	0	0	0	0	2	0	0	1	0	0	0	0.231
[BMIM][Tf2N]	[BMIM]	[Tf2N]	303.1	18.12	1	1	4	2	0	0	0	0	0	0	0	0	0	0	0	0	0	0	0	1	0	0	0	0	0	0	0	0	1	0	0	0	0	0	0	0	2	0	0	1	0	0	0	0.404
[BMIM][Tf2N]	[BMIM]	[Tf2N]	333.19	15.74	1	1	4	2	0	0	0	0	0	0	0	0	0	0	0	0	0	0	0	1	0	0	0	0	0	0	0	0	1	0	0	0	0	0	0	0	2	0	0	1	0	0	0	0.231
[BMIM][Tf2N]	[BMIM]	[Tf2N]	313.19	15.4	1	1	4	2	0	0	0	0	0	0	0	0	0	0	0	0	0	0	0	1	0	0	0	0	0	0	0	0	1	0	0	0	0	0	0	0	2	0	0	1	0	0	0	0.319
[BMIM][Tf2N]	[BMIM]	[Tf2N]	293.53	14.1	1	1	4	2	0	0	0	0	0	0	0	0	0	0	0	0	0	0	0	1	0	0	0	0	0	0	0	0	1	0	0	0	0	0	0	0	2	0	0	1	0	0	0	0.404
[BMIM][Tf2N]	[BMIM]	[Tf2N]	323.22	13.03	1	1	4	2	0	0	0	0	0	0	0	0	0	0	0	0	0	0	0	1	0	0	0	0	0	0	0	0	1	0	0	0	0	0	0	0	2	0	0	1	0	0	0	0.231
[BMIM][Tf2N]	[BMIM]	[Tf2N]	303.05	12.23	1	1	4	2	0	0	0	0	0	0	0	0	0	0	0	0	0	0	0	1	0	0	0	0	0	0	0	0	1	0	0	0	0	0	0	0	2	0	0	1	0	0	0	0.319
[BMIM][Tf2N]	[BMIM]	[Tf2N]	313.32	10.5	1	1	4	2	0	0	0	0	0	0	0	0	0	0	0	0	0	0	0	1	0	0	0	0	0	0	0	0	1	0	0	0	0	0	0	0	2	0	0	1	0	0	0	0.231
[BMIM][Tf2N]	[BMIM]	[Tf2N]	293.21	9.15	1	1	4	2	0	0	0	0	0	0	0	0	0	0	0	0	0	0	0	1	0	0	0	0	0	0	0	0	1	0	0	0	0	0	0	0	2	0	0	1	0	0	0	0.319
[BMIM][Tf2N]	[BMIM]	[Tf2N]	303.18	7.86	1	1	4	2	0	0	0	0	0	0	0	0	0	0	0	0	0	0	0	1	0	0	0	0	0	0	0	0	1	0	0	0	0	0	0	0	2	0	0	1	0	0	0	0.231
[BMIM][Tf2N]	[BMIM]	[Tf2N]	292.65	6.29	1	1	4	2	0	0	0	0	0	0	0	0	0	0	0	0	0	0	0	1	0	0	0	0	0	0	0	0	1	0	0	0	0	0	0	0	2	0	0	1	0	0	0	0.231
[BMIM][MDEGSO4]	[BMIM]	[MDEGSO4]	333.36	91.2	1	1	4	2	0	0	0	0	0	0	0	0	0	0	0	0	0	0	0	1	0	0	0	0	0	0	0	1	0	0	0	0	0	0	0	0	1	0	0	0	5	2	0	0.494
[BMIM][MDEGSO4]	[BMIM]	[MDEGSO4]	313.31	84	1	1	4	2	0	0	0	0	0	0	0	0	0	0	0	0	0	0	0	1	0	0	0	0	0	0	0	1	0	0	0	0	0	0	0	0	1	0	0	0	5	2	0	0.46
[BMIM][MDEGSO4]	[BMIM]	[MDEGSO4]	333.36	78	1	1	4	2	0	0	0	0	0	0	0	0	0	0	0	0	0	0	0	1	0	0	0	0	0	0	0	1	0	0	0	0	0	0	0	0	1	0	0	0	5	2	0	0.406
[BMIM][MDEGSO4]	[BMIM]	[MDEGSO4]	333.36	66.9	1	1	4	2	0	0	0	0	0	0	0	0	0	0	0	0	0	0	0	1	0	0	0	0	0	0	0	1	0	0	0	0	0	0	0	0	1	0	0	0	5	2	0	0.35
[BMIM][MDEGSO4]	[BMIM]	[MDEGSO4]	313.31	63.9	1	1	4	2	0	0	0	0	0	0	0	0	0	0	0	0	0	0	0	1	0	0	0	0	0	0	0	1	0	0	0	0	0	0	0	0	1	0	0	0	5	2	0	0.345
[BMIM][MDEGSO4]	[BMIM]	[MDEGSO4]	333.36	56.5	1	1	4	2	0	0	0	0	0	0	0	0	0	0	0	0	0	0	0	1	0	0	0	0	0	0	0	1	0	0	0	0	0	0	0	0	1	0	0	0	5	2	0	0.308
[BMIM][MDEGSO4]	[BMIM]	[MDEGSO4]	313.31	44.1	1	1	4	2	0	0	0	0	0	0	0	0	0	0	0	0	0	0	0	1	0	0	0	0	0	0	0	1	0	0	0	0	0	0	0	0	1	0	0	0	5	2	0	0.206
[BMIM][MDEGSO4]	[BMIM]	[MDEGSO4]	333.36	41.4	1	1	4	2	0	0	0	0	0	0	0	0	0	0	0	0	0	0	0	1	0	0	0	0	0	0	0	1	0	0	0	0	0	0	0	0	1	0	0	0	5	2	0	0.216
[BMIM][MDEGSO4]	[BMIM]	[MDEGSO4]	313.31	26.5	1	1	4	2	0	0	0	0	0	0	0	0	0	0	0	0	0	0	0	1	0	0	0	0	0	0	0	1	0	0	0	0	0	0	0	0	1	0	0	0	5	2	0	0.121
[BMIM][MDEGSO4]	[BMIM]	[MDEGSO4]	333.36	20.9	1	1	4	2	0	0	0	0	0	0	0	0	0	0	0	0	0	0	0	1	0	0	0	0	0	0	0	1	0	0	0	0	0	0	0	0	1	0	0	0	5	2	0	0.0932
[BMIM][MDEGSO4]	[BMIM]	[MDEGSO4]	313.31	14.3	1	1	4	2	0	0	0	0	0	0	0	0	0	0	0	0	0	0	0	1	0	0	0	0	0	0	0	1	0	0	0	0	0	0	0	0	1	0	0	0	5	2	0	0.0962
[C6F9MIM][Tf2N]	[C6F9MIM]	[Tf2N]	313.22	92.3	1	0	0	2	1	6	0	0	0	0	0	0	0	0	0	0	0	0	0	1	0	0	0	0	0	0	0	0	1	0	0	0	0	0	0	0	2	0	0	1	0	0	0	0.853
[C6F9MIM][Tf2N]	[C6F9MIM]	[Tf2N]	333.3	90.9	1	0	0	2	1	6	0	0	0	0	0	0	0	0	0	0	0	0	0	1	0	0	0	0	0	0	0	0	1	0	0	0	0	0	0	0	2	0	0	1	0	0	0	0.761
[C6F9MIM][Tf2N]	[C6F9MIM]	[Tf2N]	333.3	77.2	1	0	0	2	1	6	0	0	0	0	0	0	0	0	0	0	0	0	0	1	0	0	0	0	0	0	0	0	1	0	0	0	0	0	0	0	2	0	0	1	0	0	0	0.699
[C6F9MIM][Tf2N]	[C6F9MIM]	[Tf2N]	313.22	70.3	1	0	0	2	1	6	0	0	0	0	0	0	0	0	0	0	0	0	0	1	0	0	0	0	0	0	0	0	1	0	0	0	0	0	0	0	2	0	0	1	0	0	0	0.781
[C6F9MIM][Tf2N]	[C6F9MIM]	[Tf2N]	333.3	66.9	1	0	0	2	1	6	0	0	0	0	0	0	0	0	0	0	0	0	0	1	0	0	0	0	0	0	0	0	1	0	0	0	0	0	0	0	2	0	0	1	0	0	0	0.668
[C6F9MIM][Tf2N]	[C6F9MIM]	[Tf2N]	333.3	56.9	1	0	0	2	1	6	0	0	0	0	0	0	0	0	0	0	0	0	0	1	0	0	0	0	0	0	0	0	1	0	0	0	0	0	0	0	2	0	0	1	0	0	0	0.617
[C6F9MIM][Tf2N]	[C6F9MIM]	[Tf2N]	313.22	56.6	1	0	0	2	1	6	0	0	0	0	0	0	0	0	0	0	0	0	0	1	0	0	0	0	0	0	0	0	1	0	0	0	0	0	0	0	2	0	0	1	0	0	0	0.735
[C6F9MIM][Tf2N]	[C6F9MIM]	[Tf2N]	298.13	51.9	1	0	0	2	1	6	0	0	0	0	0	0	0	0	0	0	0	0	0	1	0	0	0	0	0	0	0	0	1	0	0	0	0	0	0	0	2	0	0	1	0	0	0	0.762
[C6F9MIM][Tf2N]	[C6F9MIM]	[Tf2N]	313.22	46.4	1	0	0	2	1	6	0	0	0	0	0	0	0	0	0	0	0	0	0	1	0	0	0	0	0	0	0	0	1	0	0	0	0	0	0	0	2	0	0	1	0	0	0	0.668
[C6F9MIM][Tf2N]	[C6F9MIM]	[Tf2N]	333.3	42.9	1	0	0	2	1	6	0	0	0	0	0	0	0	0	0	0	0	0	0	1	0	0	0	0	0	0	0	0	1	0	0	0	0	0	0	0	2	0	0	1	0	0	0	0.557
[C6F9MIM][Tf2N]	[C6F9MIM]	[Tf2N]	298.13	36	1	0	0	2	1	6	0	0	0	0	0	0	0	0	0	0	0	0	0	1	0	0	0	0	0	0	0	0	1	0	0	0	0	0	0	0	2	0	0	1	0	0	0	0.683
[C6F9MIM][Tf2N]	[C6F9MIM]	[Tf2N]	313.22	35.6	1	0	0	2	1	6	0	0	0	0	0	0	0	0	0	0	0	0	0	1	0	0	0	0	0	0	0	0	1	0	0	0	0	0	0	0	2	0	0	1	0	0	0	0.627
[C6F9MIM][Tf2N]	[C6F9MIM]	[Tf2N]	333.3	32.2	1	0	0	2	1	6	0	0	0	0	0	0	0	0	0	0	0	0	0	1	0	0	0	0	0	0	0	0	1	0	0	0	0	0	0	0	2	0	0	1	0	0	0	0.479
[C6F9MIM][Tf2N]	[C6F9MIM]	[Tf2N]	313.22	27.1	1	0	0	2	1	6	0	0	0	0	0	0	0	0	0	0	0	0	0	1	0	0	0	0	0	0	0	0	1	0	0	0	0	0	0	0	2	0	0	1	0	0	0	0.562
[C6F9MIM][Tf2N]	[C6F9MIM]	[Tf2N]	298.13	25.9	1	0	0	2	1	6	0	0	0	0	0	0	0	0	0	0	0	0	0	1	0	0	0	0	0	0	0	0	1	0	0	0	0	0	0	0	2	0	0	1	0	0	0	0.554
[C6F9MIM][Tf2N]	[C6F9MIM]	[Tf2N]	333.3	20.4	1	0	0	2	1	6	0	0	0	0	0	0	0	0	0	0	0	0	0	1	0	0	0	0	0	0	0	0	1	0	0	0	0	0	0	0	2	0	0	1	0	0	0	0.377
[C6F9MIM][Tf2N]	[C6F9MIM]	[Tf2N]	313.22	17.3	1	0	0	2	1	6	0	0	0	0	0	0	0	0	0	0	0	0	0	1	0	0	0	0	0	0	0	0	1	0	0	0	0	0	0	0	2	0	0	1	0	0	0	0.394
[C6F9MIM][Tf2N]	[C6F9MIM]	[Tf2N]	298.13	16.9	1	0	0	2	1	6	0	0	0	0	0	0	0	0	0	0	0	0	0	1	0	0	0	0	0	0	0	0	1	0	0	0	0	0	0	0	2	0	0	1	0	0	0	0.473
[C6F9MIM][Tf2N]	[C6F9MIM]	[Tf2N]	298.16	13	1	0	0	2	1	6	0	0	0	0	0	0	0	0	0	0	0	0	0	1	0	0	0	0	0	0	0	0	1	0	0	0	0	0	0	0	2	0	0	1	0	0	0	0.337
[C6F9MIM][Tf2N]	[C6F9MIM]	[Tf2N]	298.16	13	1	0	0	2	1	6	0	0	0	0	0	0	0	0	0	0	0	0	0	1	0	0	0	0	0	0	0	0	1	0	0	0	0	0	0	0	2	0	0	1	0	0	0	0.337
[C6F9MIM][Tf2N]	[C6F9MIM]	[Tf2N]	333.13	13	1	0	0	2	1	6	0	0	0	0	0	0	0	0	0	0	0	0	0	1	0	0	0	0	0	0	0	0	1	0	0	0	0	0	0	0	2	0	0	1	0	0	0	0.22
[C6F9MIM][Tf2N]	[C6F9MIM]	[Tf2N]	333.13	13	1	0	0	2	1	6	0	0	0	0	0	0	0	0	0	0	0	0	0	1	0	0	0	0	0	0	0	0	1	0	0	0	0	0	0	0	2	0	0	1	0	0	0	0.22
[C6F9MIM][Tf2N]	[C6F9MIM]	[Tf2N]	298.16	12	1	0	0	2	1	6	0	0	0	0	0	0	0	0	0	0	0	0	0	1	0	0	0	0	0	0	0	0	1	0	0	0	0	0	0	0	2	0	0	1	0	0	0	0.319
[C6F9MIM][Tf2N]	[C6F9MIM]	[Tf2N]	333.13	12	1	0	0	2	1	6	0	0	0	0	0	0	0	0	0	0	0	0	0	1	0	0	0	0	0	0	0	0	1	0	0	0	0	0	0	0	2	0	0	1	0	0	0	0.208
[C6F9MIM][Tf2N]	[C6F9MIM]	[Tf2N]	298.13	11.1	1	0	0	2	1	6	0	0	0	0	0	0	0	0	0	0	0	0	0	1	0	0	0	0	0	0	0	0	1	0	0	0	0	0	0	0	2	0	0	1	0	0	0	0.242
[C6F9MIM][Tf2N]	[C6F9MIM]	[Tf2N]	298.16	11	1	0	0	2	1	6	0	0	0	0	0	0	0	0	0	0	0	0	0	1	0	0	0	0	0	0	0	0	1	0	0	0	0	0	0	0	2	0	0	1	0	0	0	0.299
[C6F9MIM][Tf2N]	[C6F9MIM]	[Tf2N]	298.16	11	1	0	0	2	1	6	0	0	0	0	0	0	0	0	0	0	0	0	0	1	0	0	0	0	0	0	0	0	1	0	0	0	0	0	0	0	2	0	0	1	0	0	0	0.301
[C6F9MIM][Tf2N]	[C6F9MIM]	[Tf2N]	333.13	11	1	0	0	2	1	6	0	0	0	0	0	0	0	0	0	0	0	0	0	1	0	0	0	0	0	0	0	0	1	0	0	0	0	0	0	0	2	0	0	1	0	0	0	0.194
[C6F9MIM][Tf2N]	[C6F9MIM]	[Tf2N]	333.13	11	1	0	0	2	1	6	0	0	0	0	0	0	0	0	0	0	0	0	0	1	0	0	0	0	0	0	0	0	1	0	0	0	0	0	0	0	2	0	0	1	0	0	0	0.194
[C6F9MIM][Tf2N]	[C6F9MIM]	[Tf2N]	333.3	10.1	1	0	0	2	1	6	0	0	0	0	0	0	0	0	0	0	0	0	0	1	0	0	0	0	0	0	0	0	1	0	0	0	0	0	0	0	2	0	0	1	0	0	0	0.24
[C6F9MIM][Tf2N]	[C6F9MIM]	[Tf2N]	298.16	10	1	0	0	2	1	6	0	0	0	0	0	0	0	0	0	0	0	0	0	1	0	0	0	0	0	0	0	0	1	0	0	0	0	0	0	0	2	0	0	1	0	0	0	0.279
[C6F9MIM][Tf2N]	[C6F9MIM]	[Tf2N]	333.13	9.97	1	0	0	2	1	6	0	0	0	0	0	0	0	0	0	0	0	0	0	1	0	0	0	0	0	0	0	0	1	0	0	0	0	0	0	0	2	0	0	1	0	0	0	0.179
[C6F9MIM][Tf2N]	[C6F9MIM]	[Tf2N]	298.16	8.5	1	0	0	2	1	6	0	0	0	0	0	0	0	0	0	0	0	0	0	1	0	0	0	0	0	0	0	0	1	0	0	0	0	0	0	0	2	0	0	1	0	0	0	0.245
[C6F9MIM][Tf2N]	[C6F9MIM]	[Tf2N]	333.13	8.5	1	0	0	2	1	6	0	0	0	0	0	0	0	0	0	0	0	0	0	1	0	0	0	0	0	0	0	0	1	0	0	0	0	0	0	0	2	0	0	1	0	0	0	0.156
[C6F9MIM][Tf2N]	[C6F9MIM]	[Tf2N]	298.16	6.99	1	0	0	2	1	6	0	0	0	0	0	0	0	0	0	0	0	0	0	1	0	0	0	0	0	0	0	0	1	0	0	0	0	0	0	0	2	0	0	1	0	0	0	0.21
[C6F9MIM][Tf2N]	[C6F9MIM]	[Tf2N]	333.13	6.99	1	0	0	2	1	6	0	0	0	0	0	0	0	0	0	0	0	0	0	1	0	0	0	0	0	0	0	0	1	0	0	0	0	0	0	0	2	0	0	1	0	0	0	0.133
[C6F9MIM][Tf2N]	[C6F9MIM]	[Tf2N]	333.13	6.01	1	0	0	2	1	6	0	0	0	0	0	0	0	0	0	0	0	0	0	1	0	0	0	0	0	0	0	0	1	0	0	0	0	0	0	0	2	0	0	1	0	0	0	0.113
[C6F9MIM][Tf2N]	[C6F9MIM]	[Tf2N]	298.16	6	1	0	0	2	1	6	0	0	0	0	0	0	0	0	0	0	0	0	0	1	0	0	0	0	0	0	0	0	1	0	0	0	0	0	0	0	2	0	0	1	0	0	0	0.188
[C6F9MIM][Tf2N]	[C6F9MIM]	[Tf2N]	298.16	5.5	1	0	0	2	1	6	0	0	0	0	0	0	0	0	0	0	0	0	0	1	0	0	0	0	0	0	0	0	1	0	0	0	0	0	0	0	2	0	0	1	0	0	0	0.171
[C6F9MIM][Tf2N]	[C6F9MIM]	[Tf2N]	333.13	5.49	1	0	0	2	1	6	0	0	0	0	0	0	0	0	0	0	0	0	0	1	0	0	0	0	0	0	0	0	1	0	0	0	0	0	0	0	2	0	0	1	0	0	0	0.106
[C6F9MIM][Tf2N]	[C6F9MIM]	[Tf2N]	333.13	4.01	1	0	0	2	1	6	0	0	0	0	0	0	0	0	0	0	0	0	0	1	0	0	0	0	0	0	0	0	1	0	0	0	0	0	0	0	2	0	0	1	0	0	0	0.0767
[C6F9MIM][Tf2N]	[C6F9MIM]	[Tf2N]	298.16	4	1	0	0	2	1	6	0	0	0	0	0	0	0	0	0	0	0	0	0	1	0	0	0	0	0	0	0	0	1	0	0	0	0	0	0	0	2	0	0	1	0	0	0	0.128
[C6F9MIM][Tf2N]	[C6F9MIM]	[Tf2N]	298.16	2.5	1	0	0	2	1	6	0	0	0	0	0	0	0	0	0	0	0	0	0	1	0	0	0	0	0	0	0	0	1	0	0	0	0	0	0	0	2	0	0	1	0	0	0	0.0821
[C6F9MIM][Tf2N]	[C6F9MIM]	[Tf2N]	333.13	2.49	1	0	0	2	1	6	0	0	0	0	0	0	0	0	0	0	0	0	0	1	0	0	0	0	0	0	0	0	1	0	0	0	0	0	0	0	2	0	0	1	0	0	0	0.0488
[C6F9MIM][Tf2N]	[C6F9MIM]	[Tf2N]	333.13	2	1	0	0	2	1	6	0	0	0	0	0	0	0	0	0	0	0	0	0	1	0	0	0	0	0	0	0	0	1	0	0	0	0	0	0	0	2	0	0	1	0	0	0	0.0352
[C6F9MIM][Tf2N]	[C6F9MIM]	[Tf2N]	298.16	2	1	0	0	2	1	6	0	0	0	0	0	0	0	0	0	0	0	0	0	1	0	0	0	0	0	0	0	0	1	0	0	0	0	0	0	0	2	0	0	1	0	0	0	0.074
[C6F9MIM][Tf2N]	[C6F9MIM]	[Tf2N]	298.16	0.999	1	0	0	2	1	6	0	0	0	0	0	0	0	0	0	0	0	0	0	1	0	0	0	0	0	0	0	0	1	0	0	0	0	0	0	0	2	0	0	1	0	0	0	0.0342
[C6F9MIM][Tf2N]	[C6F9MIM]	[Tf2N]	333.13	0.998	1	0	0	2	1	6	0	0	0	0	0	0	0	0	0	0	0	0	0	1	0	0	0	0	0	0	0	0	1	0	0	0	0	0	0	0	2	0	0	1	0	0	0	0.0215
[C6F9MIM][Tf2N]	[C6F9MIM]	[Tf2N]	298.16	0.5	1	0	0	2	1	6	0	0	0	0	0	0	0	0	0	0	0	0	0	1	0	0	0	0	0	0	0	0	1	0	0	0	0	0	0	0	2	0	0	1	0	0	0	0.0168
[C6F9MIM][Tf2N]	[C6F9MIM]	[Tf2N]	333.13	0.494	1	0	0	2	1	6	0	0	0	0	0	0	0	0	0	0	0	0	0	1	0	0	0	0	0	0	0	0	1	0	0	0	0	0	0	0	2	0	0	1	0	0	0	0.0106
[C6F9MIM][Tf2N]	[C6F9MIM]	[Tf2N]	333.13	0.206	1	0	0	2	1	6	0	0	0	0	0	0	0	0	0	0	0	0	0	1	0	0	0	0	0	0	0	0	1	0	0	0	0	0	0	0	2	0	0	1	0	0	0	0.000823
[C6F9MIM][Tf2N]	[C6F9MIM]	[Tf2N]	298.16	0.198	1	0	0	2	1	6	0	0	0	0	0	0	0	0	0	0	0	0	0	1	0	0	0	0	0	0	0	0	1	0	0	0	0	0	0	0	2	0	0	1	0	0	0	0.0117
[C6F9MIM][Tf2N]	[C6F9MIM]	[Tf2N]	298.16	0.0987	1	0	0	2	1	6	0	0	0	0	0	0	0	0	0	0	0	0	0	1	0	0	0	0	0	0	0	0	1	0	0	0	0	0	0	0	2	0	0	1	0	0	0	0.00354
[C6F9MIM][Tf2N]	[C6F9MIM]	[Tf2N]	333.13	0.0947	1	0	0	2	1	6	0	0	0	0	0	0	0	0	0	0	0	0	0	1	0	0	0	0	0	0	0	0	1	0	0	0	0	0	0	0	2	0	0	1	0	0	0	0.00195
[C6F9MIM][Tf2N]	[C6F9MIM]	[Tf2N]	298.16	0.073	1	0	0	2	1	6	0	0	0	0	0	0	0	0	0	0	0	0	0	1	0	0	0	0	0	0	0	0	1	0	0	0	0	0	0	0	2	0	0	1	0	0	0	0.00277
[C6F9MIM][Tf2N]	[C6F9MIM]	[Tf2N]	333.13	0.0693	1	0	0	2	1	6	0	0	0	0	0	0	0	0	0	0	0	0	0	1	0	0	0	0	0	0	0	0	1	0	0	0	0	0	0	0	2	0	0	1	0	0	0	0.00235
[C6F9MIM][Tf2N]	[C6F9MIM]	[Tf2N]	298.16	0.0476	1	0	0	2	1	6	0	0	0	0	0	0	0	0	0	0	0	0	0	1	0	0	0	0	0	0	0	0	1	0	0	0	0	0	0	0	2	0	0	1	0	0	0	0.0016
[C6F9MIM][Tf2N]	[C6F9MIM]	[Tf2N]	333.13	0.0426	1	0	0	2	1	6	0	0	0	0	0	0	0	0	0	0	0	0	0	1	0	0	0	0	0	0	0	0	1	0	0	0	0	0	0	0	2	0	0	1	0	0	0	0.000774
[C6F9MIM][Tf2N]	[C6F9MIM]	[Tf2N]	298.16	0.0157	1	0	0	2	1	6	0	0	0	0	0	0	0	0	0	0	0	0	0	1	0	0	0	0	0	0	0	0	1	0	0	0	0	0	0	0	2	0	0	1	0	0	0	0.000243
[C8F13MIM][Tf2N]	[C8F13MIM]	[Tf2N]	298.16	36.2	1	0	0	2	1	8	0	0	0	0	0	0	0	0	0	0	0	0	0	1	0	0	0	0	0	0	0	0	1	0	0	0	0	0	0	0	2	0	0	1	0	0	0	0.655
[C8F13MIM][Tf2N]	[C8F13MIM]	[Tf2N]	298.16	22.1	1	0	0	2	1	8	0	0	0	0	0	0	0	0	0	0	0	0	0	1	0	0	0	0	0	0	0	0	1	0	0	0	0	0	0	0	2	0	0	1	0	0	0	0.548
[C8F13MIM][Tf2N]	[C8F13MIM]	[Tf2N]	298.16	13.1	1	0	0	2	1	8	0	0	0	0	0	0	0	0	0	0	0	0	0	1	0	0	0	0	0	0	0	0	1	0	0	0	0	0	0	0	2	0	0	1	0	0	0	0.455
[C8F13MIM][Tf2N]	[C8F13MIM]	[Tf2N]	298.16	13	1	0	0	2	1	8	0	0	0	0	0	0	0	0	0	0	0	0	0	1	0	0	0	0	0	0	0	0	1	0	0	0	0	0	0	0	2	0	0	1	0	0	0	0.351
[C8F13MIM][Tf2N]	[C8F13MIM]	[Tf2N]	298.16	13	1	0	0	2	1	8	0	0	0	0	0	0	0	0	0	0	0	0	0	1	0	0	0	0	0	0	0	0	1	0	0	0	0	0	0	0	2	0	0	1	0	0	0	0.351
[C8F13MIM][Tf2N]	[C8F13MIM]	[Tf2N]	333.05	13	1	0	0	2	1	8	0	0	0	0	0	0	0	0	0	0	0	0	0	1	0	0	0	0	0	0	0	0	1	0	0	0	0	0	0	0	2	0	0	1	0	0	0	0.232
[C8F13MIM][Tf2N]	[C8F13MIM]	[Tf2N]	333.05	13	1	0	0	2	1	8	0	0	0	0	0	0	0	0	0	0	0	0	0	1	0	0	0	0	0	0	0	0	1	0	0	0	0	0	0	0	2	0	0	1	0	0	0	0.232
[C8F13MIM][Tf2N]	[C8F13MIM]	[Tf2N]	298.16	12	1	0	0	2	1	8	0	0	0	0	0	0	0	0	0	0	0	0	0	1	0	0	0	0	0	0	0	0	1	0	0	0	0	0	0	0	2	0	0	1	0	0	0	0.332
[truncated: 8,118 more rows]

## Sheet: Table S6
Table S6. Model input features based on CORE descriptor
[truncated: 10,117 more rows]

## Sheet: Table S7
Table S7 Comparison of performance of different EL models based on FSD descriptor in different datasets.
[truncated: 8 more rows]

[truncated: 5 more sheets: Table S8, Table S9, Table S10, Table S11, Table S12]
